# Supplementary material for: Pd-Catalyzed coupling reaction of cyclobutanols with propargylic carbonates
Source: Royal Society of Chemistry journal article supplement (doi:10.1039/c9qo00192a), 2019-01-01

## **Pd-catalyzed coupling reaction of cyclobutanols with propargylic carbonates**

Penglin Wu,<sup>a</sup> Minqiang Jia,<sup>a,\*</sup> and Shengming Ma<sup>a,b,\*</sup>

<sup>a</sup> Research Center of Molecular Recognition and Synthesis, Department of Chemistry,  
Fudan University, 220 Handan Road, Shanghai 200433, P. R. China.

<sup>b</sup> State Key Laboratory of Organometallic Chemistry, Shanghai Institute of Organic  
Chemistry, Chinese Academy of Sciences, 345 Lingling Road,  
Shanghai 200032, P. R. China.

E-mail: [masm@sioc.ac.cn](mailto:masm@sioc.ac.cn),  
[mqjia@fudan.edu.cn](mailto:mqjia@fudan.edu.cn)

### **Supporting information**

|                                          |          |
|------------------------------------------|----------|
| General information                      | S2       |
| Experimental details and analytical data | S3-S29   |
| Reference                                | S30      |
| NMR Spectra                              | S31- S85 |

**General Information.** NMR spectra were taken with an Agilent-400 spectrometer (400 MHz for  $^1\text{H}$  NMR, 100 MHz for  $^{13}\text{C}$  NMR, and 376 MHz for  $^{19}\text{F}$  NMR). Chemical shifts were recorded in ppm in relative to the TMS in  $\text{CDCl}_3$  and  $\text{CFCl}_3$  ( $^{19}\text{F}$  CPD,  $\delta = 0$ ) as the internal standards, respectively, and coupling constants were reported in Hz. All reactions were carried out in flame-dried Schlenk tubes under an argon atmosphere.  $\text{Pd}(\text{dba})_2$  was purchased from TCI Chemicals; XPhos was purchased from Energy Chemical;  $\text{K}_3\text{PO}_4 \cdot 3\text{H}_2\text{O}$  was purchased from Sinopharm Reagent Co., Ltd.; Toluene, THF, and dioxane were dried over sodium wire with benzophenone as the indicator and distilled freshly before use. DCM and  $\text{CH}_3\text{CN}$  were dried over  $\text{CaH}_2$  and distilled freshly before use. DMF was dried over  $\text{MgSO}_4$  and distilled before use. Petroleum ether (60  $^\circ\text{C}$  - 90  $^\circ\text{C}$ ) was used for chromatography. All the temperatures are referred to the oil baths, acetone/dry ice bath, or ice/water bath used. NMR yields and recovery of starting material were determined by  $^1\text{H}$  NMR analysis of the related reaction mixtures using dibromomethane as the internal standard. Cyclobutanols **1a-1g**,<sup>[1a]</sup> **1h**,<sup>[1b]</sup> **1i**,<sup>[1c]</sup> **1j**,<sup>[1d]</sup> **1k**,<sup>[1a]</sup> were synthesized according to the reported procedures. **1l** was purchased from Bide Pharmatech Ltd. Propargylic carbonates **2a**,<sup>[2a]</sup> **2b**,<sup>[2b]</sup> **2c**,<sup>[2b]</sup> **2e**,<sup>[2b]</sup> **2f**,<sup>[2c]</sup> **2h**,<sup>[2d]</sup> **2k**,<sup>[2d]</sup> were synthesized from propargylic alcohols according to the reported procedures.

## Experimental details and analytical data

### 1. Synthesis of cyclobutanol **1k**.

Synthesis of 3-(benzyloxy)-1-phenylcyclobutanol (**1k**)<sup>[1a]</sup> (wpl-4-190)

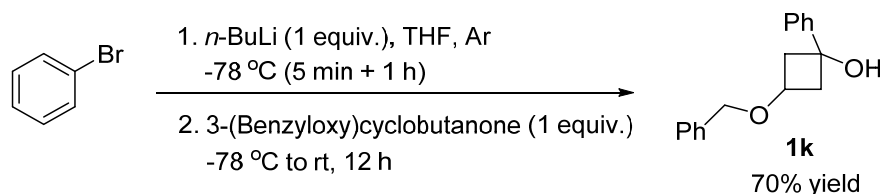

To a flame-dried three-necked flask charged with bromobenzene (0.42 mL,  $d = 1.491$  g/mL, 0.6262 g, 4 mmol) and 10 mL of THF was cooled to -78 °C. Then *n*-BuLi (1.6 mL, 2.5 M in hexane, 4.0 mmol, 1.0 equiv.) was added dropwise via a syringe within 5 min under Ar. The resulting mixture was stirred for 1.0 h at -78 °C followed by the addition of 3-(benzyloxy)cyclobutanone (0.7037 g, 4.0 mmol, 1.0 equiv.). The resulting mixture was naturally warmed up to room temperature and stirred for 12 h. Then the mixture was cooled to 0 °C with an ice/water bath and quenched with a saturated solution of NH<sub>4</sub>Cl (aq) (10 mL), extracted with ethyl acetate (10 mL  $\times$  3), washed with a saturated solution of NaCl (aq) (20 mL), dried over anhydrous Na<sub>2</sub>SO<sub>4</sub>, filtered, and concentrated. The residue was purified by column chromatography on silica gel [eluent: petroleum ether/ethyl acetate = 20/1 (0.4 L) to 5/1 (0.4 L)] to afford **1k** (0.7121 g, 70%) as an oil: <sup>1</sup>H NMR (400 MHz, CDCl<sub>3</sub>):  $\delta = 7.47$ - $7.41$  (m, 2 H, Ar-H),  $7.38$ - $7.21$  (m, 8 H, Ar-H),  $4.43$  (s, 2 H, OCH<sub>2</sub>),  $3.82$  (quint,  $J = 6.7$  Hz, 1 H, CH),  $2.95$ - $2.86$  (m, 2 H, CH<sub>2</sub>),  $2.58$  (s, 1 H, OH),  $2.48$ - $2.39$  (m, 2 H, CH<sub>2</sub>); <sup>13</sup>C NMR (100 MHz, CDCl<sub>3</sub>):  $\delta = 145.4$ , 138.0, 128.5, 128.4, 127.8, 127.7, 127.3, 125.1, 70.4, 70.2, 65.3, 45.2; IR (neat, cm<sup>-1</sup>):  $\nu = 3405$ , 3061, 3029, 2984, 2937, 2864, 1602, 1495, 1447, 1348, 1237, 1154, 1094, 1049, 1026; MS (70 eV, EI)  $m/z$  (%): 163 [(M<sup>+</sup>-CH<sub>2</sub>Ph), 22.0], 91 (100); HRMS Calcd for C<sub>10</sub>H<sub>11</sub>O<sub>2</sub> (M<sup>+</sup>-CH<sub>2</sub>Ph): 163.0759; Found: 163.0751.

### 2. Synthesis of propargylic carbonates **2d**, **2g**, **2i** and **2j**.

(1) Synthesis of 3-(2-(methoxycarbonyl)phenyl)-1-phenylprop-2-ynyl methyl carbonate (**2d**)<sup>[2a]</sup> (wpl-2-98)

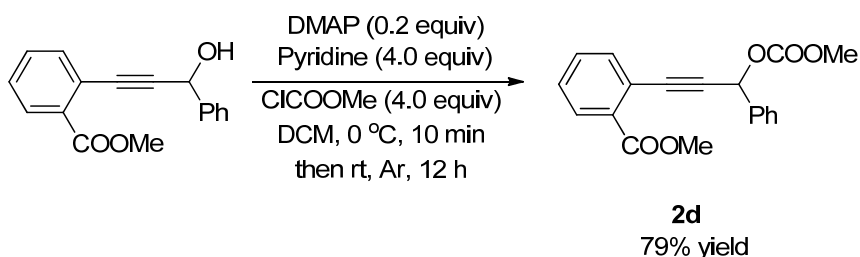

To a three-necked flask were added 3-(2-(methoxycarbonyl)phenyl)-1-phenylprop-2-ynol<sup>2f</sup> (1.3401 g, 5.0 mmol), CH<sub>2</sub>Cl<sub>2</sub> (10 mL), and DMAP (0.1220 g, 1.0 mmol) under Ar. After being cooled to 0 °C with stirring, pyridine (1.6 mL, d = 0.983 g/mL, 1.5728 g, 19.9 mmol) was added. Methyl chloroformate (1.5 mL, d = 1.223 g/mL, 1.8345 g, 19.4 mmol) was then added dropwise slowly within 10 minutes. The reaction was naturally warmed up to room temperature and stirred overnight (12 h). The resulting mixture was then diluted with CH<sub>2</sub>Cl<sub>2</sub> (20 mL), and this CH<sub>2</sub>Cl<sub>2</sub> solution was washed sequentially with water (20 mL × 3), 1 mol/L HCl (aq) (20 mL × 3), a saturated solution of NaCl (aq) (30 mL), dried over anhydrous Na<sub>2</sub>SO<sub>4</sub>, filtered, and concentrated. The residue was purified by column chromatography on silica gel [eluent: petroleum ether/ethyl acetate = 20/1 (0.8 L) to 10/1 (0.8 L)] to afford **2d** (1.2960 g, 79%) as an oil: <sup>1</sup>H NMR (400 MHz, CDCl<sub>3</sub>): δ = 7.94 (dd, *J* = 8.0 Hz, 1.2 Hz, 1 H, Ar-H), 7.71-7.63 (m, 2 H, Ar-H), 7.59 (dd, *J* = 7.6 Hz, 1.0 Hz, 1 H, Ar-H), 7.51-7.34 (m, 5 H, Ar-H), 6.58 (s, 1 H, OCH), 3.829 (s, 3 H, CH<sub>3</sub>), 3.826 (s, 3 H, CH<sub>3</sub>); <sup>13</sup>C NMR (100 MHz, CDCl<sub>3</sub>): δ = 166.5, 154.9, 136.4, 134.2, 132.3, 131.6, 130.4, 129.2, 128.7, 128.6, 127.9, 122.2, 89.5, 86.6, 70.3, 55.0, 52.0; IR (neat, cm<sup>-1</sup>): ν = 2953, 1747, 1728, 1595, 1568, 1486, 1439, 1250, 1191, 1129, 1083, 1044, 1009; MS (70 eV, EI) *m/z* (%): 324 [M<sup>+</sup>, 3.19], 233 (100); HRMS Calcd for C<sub>19</sub>H<sub>16</sub>O<sub>5</sub> (M<sup>+</sup>): 324.0998; Found: 324.1001.

(2) Synthesis of 1-(3,4-dichlorophenyl)-3-phenylprop-2-ynyl methyl carbonate (**2g**)  
(wpl-2-92)

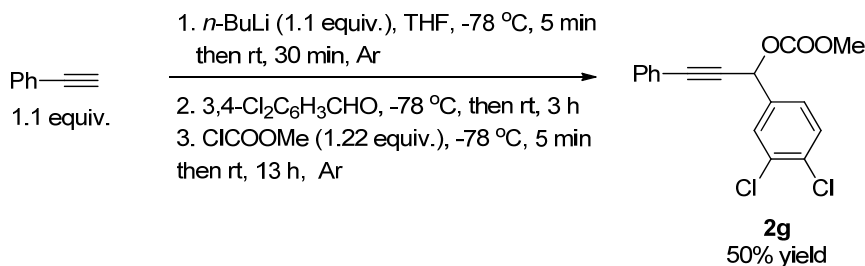

To a three-necked bottle were added THF (40 mL) and phenylacetylene (4.4 mL,  $d = 0.93 \text{ g/mL}$ , 4.092 g, 40.1 mmol). After being cooled with an acetone/dry ice bath to -78 °C with stirring, *n*-BuLi (16.0 mL, 2.5 M in hexane, 40.0 mmol) was added dropwise in 5 minutes. Then the acetone/dry ice bath was removed, and reaction was stirred at room temperature for 30 minutes. The resulting mixture was cooled to -78 °C with an acetone/dry ice bath again, followed by addition of 3,4-dichlorobenzaldehyde (6.3 g, 36.0 mmol). The acetone/dry ice bath was removed, and the reaction was stirred for 3 hours at room temperature. Then the reaction was cooled to -78 °C again with acetone/dry ice bath, and methyl chloroformate (3.4 mL,  $d = 1.223 \text{ g/mL}$ , 4.1582 g, 44.0 mmol) was added slowly in 5 minutes. Then the acetone/dry ice bath was removed, the resulting mixture was stirred at room temperature for 13 hours, then cooled to 0 °C with an ice/water bath and quenched with H<sub>2</sub>O (40 mL). The reaction was extracted with ethyl acetate (30 mL  $\times$  3), washed with a saturated solution of NaCl (aq) (40 mL), dried over anhydrous Na<sub>2</sub>SO<sub>4</sub>, filtered, and concentrated. The residue was purified by column chromatography on silica gel [eluent: petroleum ether/ethyl acetate = 80/1 (1.6 L)] to afford **2g** (6.0213 g, 50%) as an oil: <sup>1</sup>H NMR (400 MHz, CDCl<sub>3</sub>):  $\delta = 7.71$  (d,  $J = 2.0 \text{ Hz}$ , 1 H, Ar-H), 7.52-7.41 (m, 4 H, Ar-H), 7.40-7.28 (m, 3 H, Ar-H), 6.47 (s, 1 H, OCH), 3.83 (s, 3 H, CH<sub>3</sub>); <sup>13</sup>C NMR (100 MHz, CDCl<sub>3</sub>):  $\delta = 154.7, 136.7, 133.4, 132.9, 131.9, 130.7, 129.7, 129.2, 128.3, 127.0, 121.4, 88.7, 83.7, 68.7, 55.3$ ; IR (neat, cm<sup>-1</sup>):  $\nu = 2956, 2232, 1747, 1597, 1566, 1491, 1470, 1440, 1401, 1329, 1307, 1253, 1194, 1131, 1098, 1070, 1032, 1013$ ; MS (70 eV, EI)  $m/z$  (%): 338 [ $\text{M}^+(\text{}^{37,37}\text{Cl}_2)$ , 3.16], 336 [ $\text{M}^+(\text{}^{37,35}\text{Cl}_2)$ , 18.58], 334 [ $\text{M}^+(\text{}^{35,35}\text{Cl}_2)$ , 27.63], 259 (100); HRMS Calcd for C<sub>17</sub>H<sub>12</sub><sup>35,35</sup>Cl<sub>2</sub>O<sub>3</sub> (M<sup>+</sup>): 334.0163; Found: 334.0166.

(3) Synthesis of 1-(2-methoxy)-3-phenylprop-2-ynyl methyl carbonate (**2i**)

(wpl-4-180)

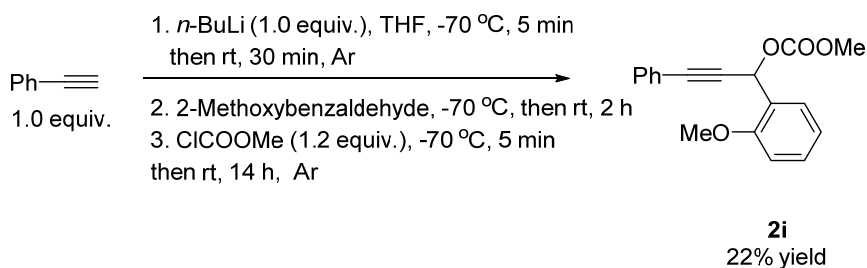

To a three-necked flask were added THF (60 mL) and phenylacetylene (4.4 mL,  $d = 0.93$  g/mL, 4.092 g, 40.1 mmol) under Ar. After being cooled to -70 °C with an ethanol/dry ice bath with stirring, *n*-BuLi (16.0 mL, 2.5 M in hexane, 40.0 mmol) was added dropwise within 5 minutes. Then the ethanol/dry ice bath was removed, and reaction was stirred at room temperature for 30 minutes. The resulting mixture was cooled to -70 °C with an ethanol/dry ice bath again, followed by addition of 2-methoxybenzaldehyde (5.46 g, 40.0 mmol). The ethanol/dry ice bath was removed, and the reaction was stirred for 2 hours at room temperature. Then the reaction was cooled to -70 °C again with an ethanol/dry ice bath, and methyl chloroformate (3.7 mL,  $d = 1.223$  g/mL, 4.5251 g, 48.0 mmol) was added slowly within 5 minutes. Then the ethanol/dry ice bath was removed, and the resulting mixture was stirred at room temperature for 14 hours, cooled to 0 °C with an ice/water bath, and quenched with a saturated solution of NH<sub>4</sub>Cl (aq) (50 mL). The reaction was extracted with ethyl acetate (30 mL  $\times$  3), washed with a saturated solution of NaCl (aq) (30 mL), dried over anhydrous Na<sub>2</sub>SO<sub>4</sub>, filtered, and concentrated. The residue was purified by recrystallize (petroleum ether/dichloromethane) to afford **2i** (2.5716 g, 22%) as a white solid: m.p. = 70.1-71.0 °C (petroleum ether/dichloromethane); <sup>1</sup>H NMR (400 MHz, CDCl<sub>3</sub>):  $\delta = 7.78$ -7.73 (m, 1 H, Ar-H), 7.51-7.44 (m, 2 H, Ar-H), 7.38-7.27 (m, 4 H, Ar-H), 7.01 (t,  $J = 7.4$  Hz, 1 H, Ar-H), 6.92 (s, 1 H, CH), 6.91 (d,  $J = 7.6$  Hz, 1 H, Ar-H), 3.87 (s, 3 H, OCH<sub>3</sub>), 3.82 (s, 3 H, OCH<sub>3</sub>); <sup>13</sup>C NMR (100 MHz, CDCl<sub>3</sub>):  $\delta = 156.8, 154.9, 131.9, 130.6, 129.1, 128.7, 128.2, 124.6, 122.2, 120.6, 110.8, 87.3, 85.0, 65.0, 55.6, 54.9$ ; IR (neat, cm<sup>-1</sup>):  $\nu = 2961, 2939, 2841, 2232, 1746, 1602, 1587, 1491, 1464, 1440, 1342, 1318, 1286, 1267, 1248, 1239, 1173, 1162, 1114, 1094, 1073, 1050,$

1022, 1007; MS (70 eV, EI)  $m/z$  (%): 296 ( $M^+$ , 22.87), 115 (100); Anal. Calcd for  $C_{18}H_{16}O_4$ : C 72.96, H 5.44; Found: C 72.89, H 5.45.

(4) Synthesis of 3-methyl-1-phenyl-1-hexyn-3-yl methyl carbonate (**2j**) (wpl-2-124)

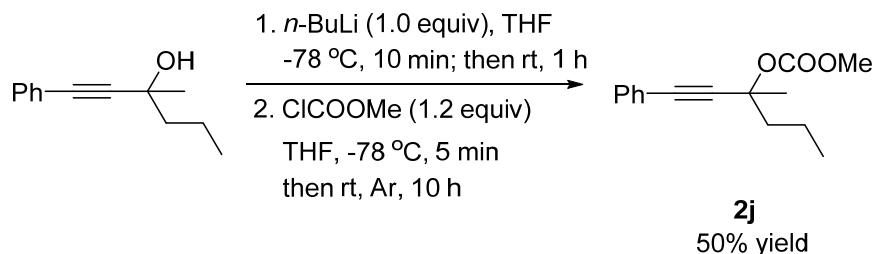

To a three-necked bottle were added THF (30 mL) and 3-methyl-1-phenyl-1-hexyn-3-ol<sup>2g</sup> (1.8824 g, 10.0 mmol). The reaction was cooled to -78 °C with an acetone/dry ice bath with stirring, *n*-BuLi (4.0 mL, 2.5 M in hexane, 10.0 mmol) was added dropwise in 10 minutes. The acetone/dry ice bath was removed and stirred at room temperature for one hour. The reaction was cooled to -78 °C with acetone/dry ice bath again, and methyl chloroformate (0.95 mL,  $d = 1.223$  g/mL, 1.1618 g, 12.3 mmol) was added dropwise slowly in 5 minutes. The acetone/dry ice bath was removed and stirred at room temperature for 10 hours. The reaction mixture was cooled to 0 °C with an ice/water bath and quenched with  $H_2O$  (20 mL). The reaction was extracted with ethyl acetate (20 mL  $\times$  3), washed with a solution of saturated NaCl (aq) (30 mL), dried over anhydrous  $Na_2SO_4$ , filtered, and concentrated. The residue was purified by column chromatography on silica gel [eluent: petroleum ether/ethyl acetate = 60/1 (1.2 L)] to afford **2j** (1.2301 g, 50%) as an oil:  $^1H$  NMR (400 MHz,  $CDCl_3$ ):  $\delta = 7.48$ -7.39 (m, 2 H, Ar-H), 7.35-7.24 (m, 3 H, Ar-H), 3.77 (s, 3 H,  $OCH_3$ ), 2.10-1.97 (m, 1 H, one proton of  $CH_2$ ), 1.96-1.82 (m, 1 H, one proton of  $CH_2$ ), 1.79 (s, 3 H,  $CH_3$ ), 1.70-1.50 (m, 2 H,  $CH_2$ ), 0.98 (t,  $J = 7.2$  Hz, 3 H,  $CH_3$ );  $^{13}C$  NMR (100 MHz,  $CDCl_3$ ):  $\delta = 153.5$ , 131.8, 128.4, 128.1, 122.4, 88.6, 85.4, 77.9, 54.2, 43.7, 26.4, 17.6, 14.0; IR (neat,  $cm^{-1}$ ):  $\nu = 2960$ , 2874, 1750, 1599, 1490, 1440, 1375, 1320, 1257, 1188, 1149, 1133, 1115, 1072, 1046, 1027, 1014; MS (70 eV, EI)  $m/z$  (%): 246 [ $M^+$ , 5.08], 142 (100); HRMS Calcd for  $C_{15}H_{18}O_3$  ( $M^+$ ):

### 3. Palladium-catalyzed synthesis of $\delta$ -allenyl ketones

(1) Preparation of 1,5,7-triphenylhepta-5,6-dien-1-one (**3aa**) (wpl-2-79)

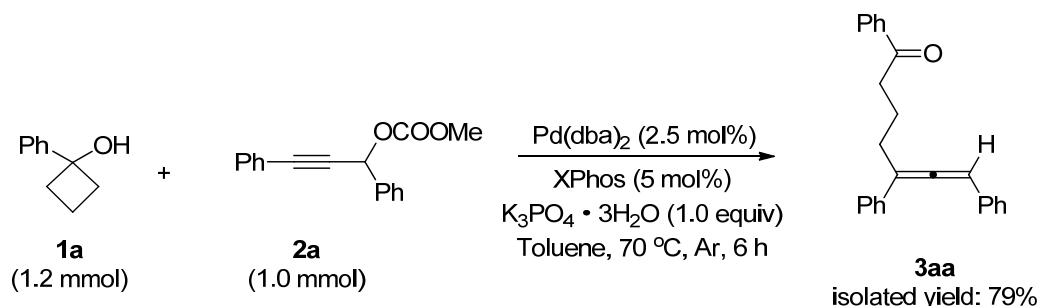

**Typical Procedure A:** To a flame-dried Schlenk tube were added Pd(dba)<sub>2</sub> (14.4 mg, 0.025 mmol), XPhos (23.7 mg, 0.05 mmol), and K<sub>3</sub>PO<sub>4</sub> · 3H<sub>2</sub>O (266.3 mg, 1.0 mmol) under Ar atmosphere. Then **1a** (solid, 177.6 mg, 1.2 mmol), **2a** (266.2 mg, 1.0 mmol)/toluene (1.0 mL), and toluene (4.0 mL) were then added sequentially under Ar atmosphere at room temperature. The Schlenk tube was then stirred at 70 °C until completion of the reaction as monitored by TLC and <sup>1</sup>H NMR (6 h). The crude reaction mixture was filtrated through a short column of silica gel (height: 3 cm,  $\Phi$ : 3.5 cm) eluted with ethyl acetate (60 mL). After evaporation, the residue was purified by chromatography on silica gel to afford **3aa** (267.3 mg, 79%) [eluent: petroleum ether/ethyl acetate = 60/1 (2.0 L)] as a white solid: m.p. = 60.6-66.1 °C (petroleum ether/dichloromethane); <sup>1</sup>H NMR (400 MHz, CDCl<sub>3</sub>)  $\delta$  = 7.93-7.80 (m, 2 H, Ar-H), 7.57-7.43 (m, 3 H, Ar-H), 7.42-7.16 (m, 10 H, Ar-H), 6.56 (t,  $J$  = 3.0 Hz, 1 H, =CH), 3.06 (t,  $J$  = 7.2 Hz, 2 H, CH<sub>2</sub>CO), 2.76-2.60 (m, 2 H, CH<sub>2</sub>), 2.18-1.98 (m, 2 H, CH<sub>2</sub>); <sup>13</sup>C NMR (100 MHz, CDCl<sub>3</sub>):  $\delta$  = 206.4, 199.9, 136.9, 135.7, 134.4, 132.9, 128.7, 128.53, 128.48, 128.0, 127.2, 127.1, 126.8, 126.1, 109.3, 98.3, 38.0, 29.6, 22.2; IR (neat, cm<sup>-1</sup>):  $\nu$  = 3057, 2957, 2891, 2843, 1934, 1680, 1594, 1578, 1490, 1460, 1445, 1404, 1370, 1339, 1285, 1268, 1229, 1196, 1174, 1156, 1072, 1028; MS (70 eV, EI)  $m/z$  (%): 338 (M<sup>+</sup>, 1.61), 220 (100); Anal. Calcd for C<sub>25</sub>H<sub>22</sub>O: C 88.72, H 6.55; Found: C 88.57, H 6.62.



(2) Preparation of 1-(4-fluorophenyl)-5,7-diphenylhepta-5,6-dien-1-one (**3ba**) (wpl-2-73)

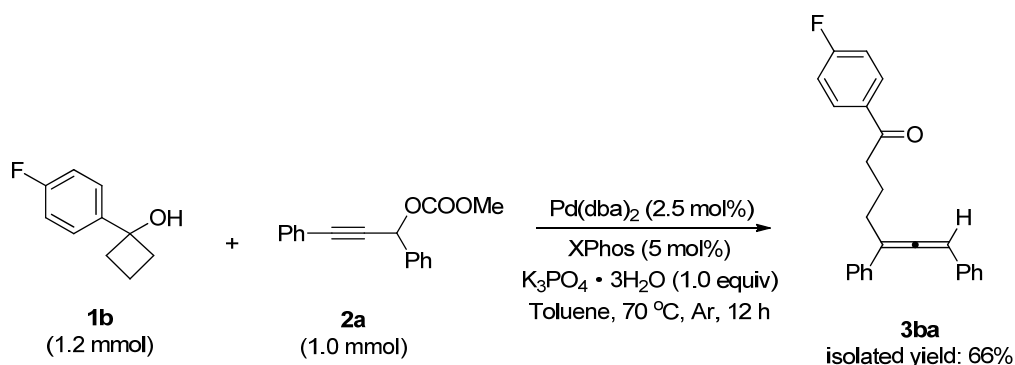

**Typical Procedure B:** To a flame-dried Schlenk tube were added Pd(dba)<sub>2</sub> (14.5 mg, 0.025 mmol), XPhos (23.6 mg, 0.05 mmol), and K<sub>3</sub>PO<sub>4</sub> · 3H<sub>2</sub>O (266.7 mg, 1.0 mmol) under Ar atmosphere. Then **1b** (liquid, 199.1 mg, 1.2 mmol) in toluene (1.0 mL), **2a** (266.0 mg, 1.0 mmol) in toluene (1.0 mL), and toluene (3.0 mL) were then added sequentially under Ar atmosphere at room temperature. The Schlenk tube was stirred at 70 °C until completion of the reaction as monitored by TLC and <sup>1</sup>H NMR (12 h). The crude reaction mixture was filtrated through a short column of silica gel (height: 3 cm, Φ: 3.5 cm) eluted with ethyl acetate (60 mL). After evaporation, the residue was purified by chromatography on silica gel to afford **3ba** (235.6 mg, 66%) [eluent: petroleum ether/ethyl acetate = 80/1 (1.2 L)] as a white solid: m.p. = 80.6-81.3 °C (petroleum ether/dichloromethane); <sup>1</sup>H NMR (400 MHz, CDCl<sub>3</sub>) δ = 7.92-7.80 (m, 2 H, Ar-H), 7.47 (d, *J* = 7.6 Hz, 2 H, Ar-H), 7.38-7.15 (m, 8 H, Ar-H), 7.04 (t, *J* = 8.6 Hz, 2 H, Ar-H), 6.56 (t, *J* = 3.0 Hz, 1 H, =CH), 3.10-2.94 (m, 2 H, CH<sub>2</sub>CO) 2.76-2.60 (m, 2 H, CH<sub>2</sub>), 2.17-1.97 (m, 2 H, CH<sub>2</sub>); <sup>13</sup>C NMR (100 MHz, CDCl<sub>3</sub>): δ = 206.4, 198.3, 165.5 (d, *J* = 252.8 Hz), 135.7, 134.3, 133.3 (d, *J* = 2.3 Hz), 130.6 (d, *J* = 9.1 Hz), 128.8, 128.5, 127.19, 127.14, 126.8, 126.0, 115.5 (d, *J* = 21.3 Hz), 109.2, 98.3, 37.8, 29.5, 22.1; <sup>19</sup>F NMR (376 MHz, CFC<sub>3</sub>): δ = -106.1; IR (neat, cm<sup>-1</sup>): ν = 3030, 2957, 2902, 2865, 2843, 2825, 1932, 1677, 1592, 1504, 1491, 1461, 1445, 1406, 1369, 1328, 1298, 1264, 1229, 1194, 1160, 1151, 1098, 1072, 1029; MS (70 eV, EI) *m/z* (%): 356 (M<sup>+</sup>, 3.68), 238 (100); Anal. Calcd for C<sub>25</sub>H<sub>21</sub>FO: C 84.24, H 5.94; Found: C 83.94, H 5.93.

(3) Preparation of 1-(4-chlorophenyl)-5,7-diphenylhepta-5,6-dien-1-one (**3ca**) (wpl-2-27)

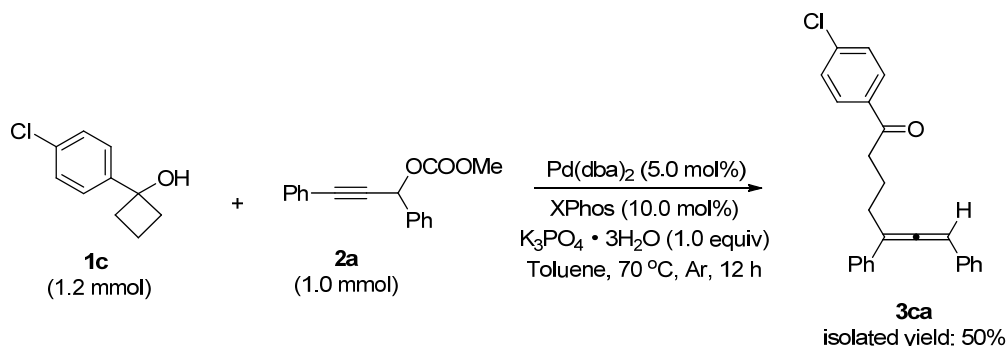

Following **Typical Procedure A**, the reaction of Pd(dba)<sub>2</sub> (28.9 mg, 0.05 mmol), XPhos (47.8 mg, 0.10 mmol), K<sub>3</sub>PO<sub>4</sub> · 3H<sub>2</sub>O (266.9 mg, 1.0 mmol), **1c** (solid, 219.1 mg, 1.2 mmol), **2a** (266.5 mg, 1.0 mmol)/toluene (1.0 mL), and toluene (4.0 mL) for 12 h afforded **3ca** (187.9 mg, 50%) [eluent: petroleum ether/ethyl acetate = 120:1 (1.0 L) for the first run, then all the products (245.5 mg) was collected and treated with the second run of chromatography, eluent: petroleum ether/ethyl acetate = 100/1 (0.8 L)] as an oil: <sup>1</sup>H NMR (400 MHz, CDCl<sub>3</sub>): δ = 7.82-7.72 (m, 2 H, Ar-H), 7.47 (d, *J* = 7.6 Hz, 2 H, Ar-H), 7.40-7.18 (m, 10 H, Ar-H), 6.57 (t, *J* = 3.0 Hz, 1 H, =CH), 3.10-2.94 (m, 2 H, CH<sub>2</sub>CO), 2.76-2.60 (m, 2 H, CH<sub>2</sub>), 2.17-1.97 (m, 2 H, CH<sub>2</sub>); <sup>13</sup>C NMR (100 MHz, CDCl<sub>3</sub>): δ = 206.4, 198.6, 139.2, 135.6, 135.2, 134.3, 129.3, 128.8, 128.7, 128.5, 127.2, 127.1, 126.7, 126.0, 109.2, 98.3, 37.9, 29.5, 22.0; IR (neat, cm<sup>-1</sup>): ν = 3082, 3060, 3027, 2931, 2894, 1932, 1682, 1588, 1491, 1446, 1399, 1365, 1314, 1259, 1223, 1198, 1175, 1091, 1028, 1012; MS (70 eV, EI) *m/z* (%): 374 [M<sup>+</sup>(<sup>37</sup>Cl), 3.58], 372 [M<sup>+</sup>(<sup>35</sup>Cl), 10.17], 139 (100); HRMS Calcd for C<sub>25</sub>H<sub>21</sub><sup>35</sup>ClO (M<sup>+</sup>): 372.1281; Found: 372.1284.

(4) Preparation of 1-(4-methoxyphenyl)-5,7-diphenylhepta-5,6-dien-1-one (**3da**) (wpl-2-7)

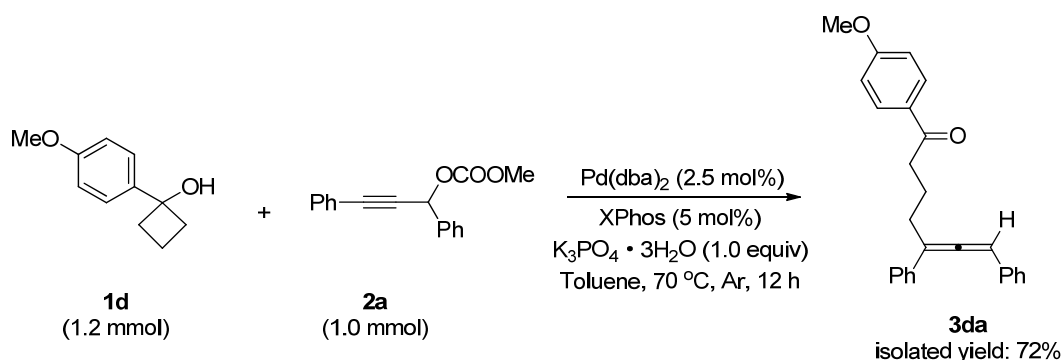

Following **Typical Procedure B**, the reaction of  $\text{Pd(dba)}_2$  (14.5 mg, 0.025 mmol), XPhos (23.6 mg, 0.05 mmol),  $\text{K}_3\text{PO}_4 \cdot 3\text{H}_2\text{O}$  (267.0 mg, 1.0 mmol), **1d** (liquid, 214.2 mg, 1.2 mmol)/toluene (1.0 mL), **2a** (266.4 mg, 1.0 mmol)/toluene (1.0 mL), and toluene (3.0 mL) for 12 h afforded **3da** (263.7 mg, 72%) [eluent: petroleum ether/ethyl acetate = 40/1 (0.4 L) to 30/1 (0.6 L)] as a yellow solid: m.p. = 88.9-89.4 °C (petroleum ether/ethyl acetate);  $^1\text{H}$  NMR (400 MHz,  $\text{CDCl}_3$ )  $\delta$  = 7.85 (d,  $J$  = 8.8 Hz, 2 H, Ar-H), 7.47 (d,  $J$  = 7.6 Hz, 2 H, Ar-H), 7.38-7.28 (m, 6 H, Ar-H), 7.26-7.18 (m, 2 H, Ar-H), 6.86 (d,  $J$  = 8.4 Hz, 2 H, Ar-H), 6.56 (t,  $J$  = 3.0 Hz, 1 H, =CH), 3.85 (s, 3 H, OMe), 3.02 (t,  $J$  = 7.2 Hz, 2 H,  $\text{CH}_2\text{CO}$ ), 2.75-2.60 (m, 2 H,  $\text{CH}_2$ ), 2.12-1.97 (m, 2 H,  $\text{CH}_2$ );  $^{13}\text{C}$  NMR (100 MHz,  $\text{CDCl}_3$ ):  $\delta$  = 206.4, 198.6, 163.3, 135.8, 134.4, 130.2, 130.0, 128.7, 128.5, 127.13, 127.08, 126.8, 126.1, 113.6, 109.3, 98.2, 55.4, 37.7, 29.7, 22.5; IR (neat,  $\text{cm}^{-1}$ ):  $\nu$  = 3025, 2953, 2894, 2842, 1933, 1672, 1599, 1574, 1507, 1493, 1459, 1447, 1417, 1370, 1346, 1311, 1259, 1201, 1182, 1105, 1073, 1024; MS (70 eV, EI)  $m/z$  (%): 368 ( $\text{M}^+$ , 2.23), 250 (100); Anal. Calcd for  $\text{C}_{26}\text{H}_{24}\text{O}_2$ : C 84.75, H 6.57; Found: C 84.45, H 6.61.

(5) Preparation of 1-(3-methoxyphenyl)-5,7-diphenylhepta-5,6-dien-1-one (**3ea**) (wpl-2-71)

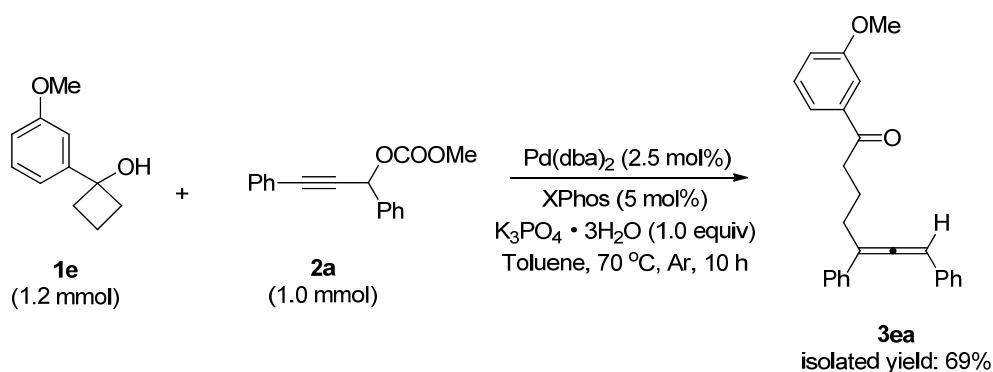

Following **Typical Procedure A**, the reaction of Pd(dba)<sub>2</sub> (14.5 mg, 0.025 mmol), XPhos (23.6 mg, 0.05 mmol), K<sub>3</sub>PO<sub>4</sub> · 3H<sub>2</sub>O (266.2 mg, 1.0 mmol), **1e** (solid, 213.6 mg, 1.2 mmol), **2a** (265.9 mg, 1.0 mmol)/toluene (1.0 mL), and toluene (4.0 mL) for 10 h afforded **3ea** (251.2 mg, 69%) [eluent: petroleum ether/ethyl acetate = 80/1 (0.4 L) to 40/1 (0.8 L)] as an oil: <sup>1</sup>H NMR (400 MHz, CDCl<sub>3</sub>) δ = 7.51-7.40 (m, 4 H, Ar-H), 7.38-7.18 (m, 9 H, Ar-H), 7.10-7.05 (m, 1 H, Ar-H), 7.11-7.04 (m, 1 H, Ar-H), 6.56 (t, *J* = 3.0 Hz, 1 H, =CH), 3.82 (s, 3 H, OCH<sub>3</sub>), 3.06 (t, *J* = 7.2 Hz, 2 H, CH<sub>2</sub>CO), 2.75-2.60 (m, 2 H, CH<sub>2</sub>), 2.18-1.98 (m, 2 H, CH<sub>2</sub>); <sup>13</sup>C NMR (100 MHz, CDCl<sub>3</sub>): δ = 206.3, 199.6, 160.0, 138.2, 135.7, 134.3, 129.4, 128.7, 128.5, 127.1, 126.7, 126.0, 120.6, 119.3, 112.1, 109.2, 98.24, 98.16, 55.3, 38.0, 29.5, 22.3; IR (neat, cm<sup>-1</sup>): ν = 2953, 2893, 1932, 1684, 1596, 1580, 1491, 1450, 1437, 1406, 1369, 1327, 1286, 1267, 1252, 1192, 1156, 1073, 1042; MS (70 eV, EI) *m/z* (%): 368 (M<sup>+</sup>, 3.30), 135 (100); HRMS Calcd for C<sub>26</sub>H<sub>24</sub>O<sub>2</sub> (M<sup>+</sup>): 368.1776; Found: 368.1772.

(6) Preparation of 1-(2-methoxyphenyl)-5,7-diphenylhepta-5,6-dien-1-one (**3fa**) (wpl-2-70)

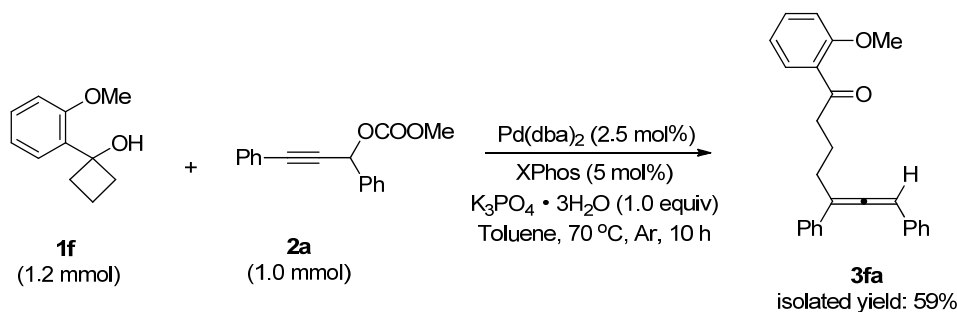

Following **Typical Procedure B**, the reaction of Pd(dba)<sub>2</sub> (14.4 mg, 0.025 mmol), XPhos (23.9 mg, 0.05 mmol), K<sub>3</sub>PO<sub>4</sub> · 3H<sub>2</sub>O (266.4 mg, 1.0 mmol), **1f** (liquid, 213.5

mg, 1.2 mmol)/toluene (1.0 mL), **2a** (266.1 mg, 1.0 mmol)/toluene (1.0 mL), and toluene (3.0 mL) for 10 h afforded **3fa** (216.2 mg, 59%) [eluent: petroleum ether/ethyl acetate = 80/1 (0.4 L) to 40/1 (0.8 L)] as a white solid: m.p. = 76.0-76.7 °C (petroleum ether/dichloromethane); <sup>1</sup>H NMR (400 MHz, CDCl<sub>3</sub>) δ = 7.62 (dd, *J*<sub>1</sub> = 8.0 Hz, *J*<sub>2</sub> = 1.6 Hz, 1 H, Ar-H), 7.52-7.38 (m, 3 H, Ar-H), 7.36-7.12 (m, 8 H, Ar-H), 6.96 (t, *J* = 7.2 Hz, 1 H, Ar-H), 6.90 (d, *J* = 8.4 Hz, 1 H, Ar-H), 6.52 (t, *J* = 2.8 Hz, 1 H, =CH), 3.78 (s, 3 H, CH<sub>3</sub>), 3.08 (t, *J* = 7.2 Hz, 2 H, CH<sub>2</sub>CO), 2.67-2.53 (m, 2 H, CH<sub>2</sub>), 2.11-1.95 (m, 2 H, CH<sub>2</sub>); <sup>13</sup>C NMR (100 MHz, CDCl<sub>3</sub>): δ = 206.4, 202.4, 158.3, 135.8, 134.4, 133.1, 130.1, 128.6, 128.4, 127.0, 126.9, 126.7, 126.1, 120.5, 111.4, 109.5, 98.0, 55.3, 43.3, 29.7, 22.7; IR (neat, cm<sup>-1</sup>): ν = 2969, 2933, 2901, 1927, 1659, 1593, 1493, 1481, 1462, 1447, 1434, 1392, 1373, 1315, 1277, 1236, 1188, 1158, 1112, 1077, 1021, 1002; MS (70 eV, EI) *m/z* (%): 368 (M<sup>+</sup>, 4.45), 135 (100); Anal. Calcd for C<sub>26</sub>H<sub>24</sub>O<sub>2</sub>: C 84.75, H 6.57; Found: C 84.37, H 6.59.

(7) Preparation of 1-(3,4-methylenedioxyphenyl)-5,7-diphenylhepta-5,6-dien-1-one (**3ga**) (wpl-2-82)

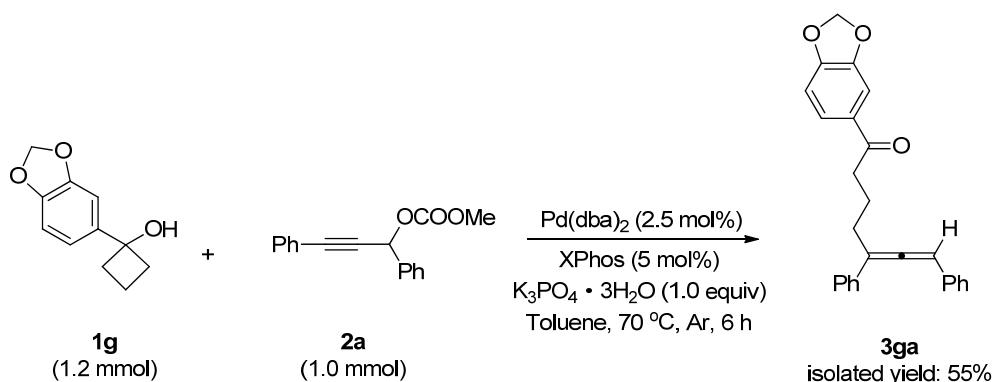

Following **Typical Procedure B**, the reaction of Pd(dba)<sub>2</sub> (14.4 mg, 0.025 mmol), XPhos (23.7 mg, 0.05 mmol), K<sub>3</sub>PO<sub>4</sub> · 3H<sub>2</sub>O (266.5 mg, 1.0 mmol), **1g** (liquid, 230.7 mg, 1.2 mmol)/toluene (1.0 mL), **2a** (266.0 mg, 1.0 mmol)/toluene (1.0 mL), and toluene (3.0 mL) for 6 h afforded **3ga** (210.3 mg, 55%) [eluent: petroleum ether/ethyl acetate = 40:1 (1.2 L) for the first run, then all the product (270.2 mg) was collected and treated with the second run of chromatography, eluent: dichloromethane/ether/petroleum ether = 1/1/15 (0.6 L), finally crystallized (petroleum

ether/dichloromethane) to provide the desired **3ga** as a yellow solid]: m.p. = 79.1-80.1 °C (petroleum ether/dichloromethane); <sup>1</sup>H NMR (400 MHz, CDCl<sub>3</sub>) δ = 7.53-7.18 (m, 12 H, Ar-H), 6.76 (d, *J* = 8.0 Hz, 1 H, Ar-H), 6.57 (t, *J* = 3.0 Hz, 1 H, =CH), 6.02 (s, 2 H, OCH<sub>2</sub>O), 2.99 (t, *J* = 7.2 Hz, 2 H, CH<sub>2</sub>CO), 2.77-2.58 (m, 2 H, CH<sub>2</sub>), 2.17-1.95 (m, 2 H, CH<sub>2</sub>); <sup>13</sup>C NMR (100 MHz, CDCl<sub>3</sub>): δ = 206.4, 198.0, 151.5, 148.1, 135.7, 134.4, 131.8, 128.7, 128.5, 127.14, 127.10, 126.8, 126.1, 124.2, 109.3, 107.8, 107.7, 101.7, 98.2, 37.7, 29.6, 22.4; IR (neat, cm<sup>-1</sup>): ν = 2893, 2838, 1933, 1798, 1681, 1620, 1597, 1501, 1484, 1440, 1409, 1363, 1338, 1326, 1284, 1260, 1246, 1193, 1108, 1069, 1036; MS (70 eV, EI) *m/z* (%): 382 (M<sup>+</sup>, 7.87), 264 (100); Anal. Calcd for C<sub>26</sub>H<sub>22</sub>O<sub>3</sub>: C 81.65, H 5.80; Found: C 81.33, H 5.84.

(8) Preparation of 9,11-diphenylundecan-9,10-dien-5-one (**3ha**) (wpl-2-39)

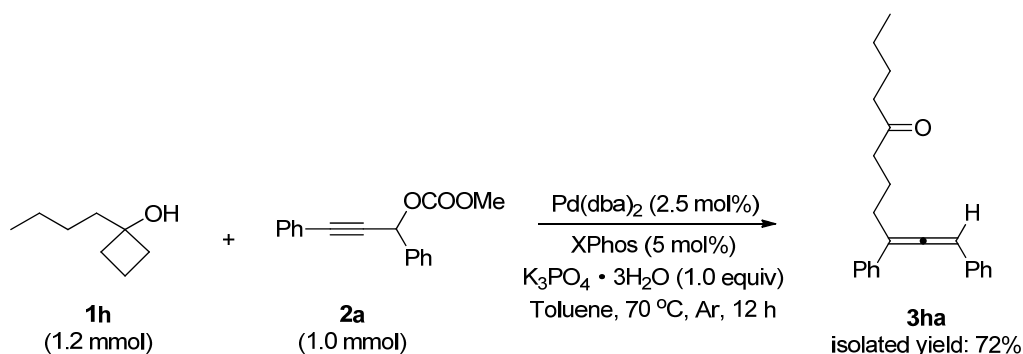

Following **Typical Procedure B**, the reaction of Pd(dba)<sub>2</sub> (14.4 mg, 0.025 mmol), XPhos (23.9 mg, 0.05 mmol), K<sub>3</sub>PO<sub>4</sub> · 3H<sub>2</sub>O (266.7 mg, 1.0 mmol), **1h** (liquid, 153.5 mg, 1.2 mmol)/toluene (1.0 mL), **2a** (266.4 mg, 1.0 mmol)/toluene (1.0 mL), and toluene (3.0 mL) for 12 h afforded **3ha** (229.2 mg, 72%) [eluent: petroleum ether/ethyl acetate = 80/1 (1.2 L)] as an oil: <sup>1</sup>H NMR (400 MHz, CDCl<sub>3</sub>): δ = 7.45 (d, *J* = 8.0 Hz, 2 H, Ar-H), 7.37-7.15 (m, 8 H, Ar-H), 6.55 (bs, 1 H, =CH), 2.58 (t, *J* = 6.6 Hz, 2 H, CH<sub>2</sub>), 2.50 (t, *J* = 7.2 Hz, 2 H, CH<sub>2</sub>), 2.30 (t, *J* = 7.6 Hz, 2 H, CH<sub>2</sub>), 1.98-1.80 (m, 2 H, CH<sub>2</sub>), 1.56-1.42 (quint, *J* = 7.5 Hz, 2 H, CH<sub>2</sub>), 1.33-1.18 (m, 2 H, CH<sub>2</sub>), 0.86 (t, *J* = 7.4 Hz, 3 H, CH<sub>3</sub>); <sup>13</sup>C NMR (100 MHz, CDCl<sub>3</sub>): δ = 211.0, 206.3, 135.7, 134.3, 128.7, 128.5, 127.1, 127.0, 126.7, 126.0, 109.2, 98.2, 42.4, 42.0, 29.4, 25.8, 22.2, 21.9, 13.8; IR (neat, cm<sup>-1</sup>): ν = 2955, 2930, 2871, 1932, 1708, 1596, 1493,

1447, 1408, 1370, 1257, 1126, 1073, 1027; MS (70 eV, EI)  $m/z$  (%): 318 ( $M^+$ , 6.43), 200 (100); HRMS Calcd for  $C_{23}H_{26}O$  ( $M^+$ ): 318.1984; Found: 318.1986.

(9) Preparation of 1-cyclohexyl-5,7-diphenylhepta-5,6-dien-1-one (**3ia**) (wpl-2-48)

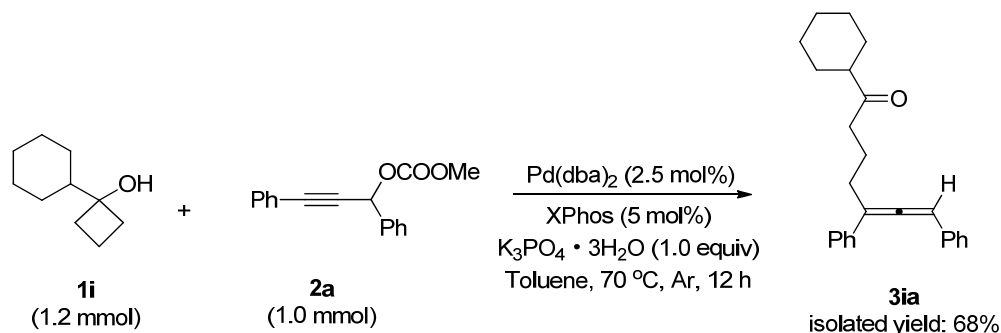

Following **Typical procedure B**, the reaction of  $\text{Pd}(\text{dba})_2$  (14.5 mg, 0.025 mmol), XPhos (23.7 mg, 0.05 mmol),  $\text{K}_3\text{PO}_4 \cdot 3\text{H}_2\text{O}$  (265.9 mg, 1.0 mmol), **1i** (liquid, 184.7 mg, 1.2 mmol)/toluene (1.0 mL), **2a** (265.9 mg, 1.0 mmol)/toluene (1.0 mL), and toluene (3.0 mL) for 12 h afforded **3ia** (233.5 mg, 68%) [eluent: petroleum ether/ethyl acetate = 80/1 (0.8 L)] as an oil:  $^1\text{H}$  NMR (400 MHz,  $\text{CDCl}_3$ ):  $\delta$  = 7.45 (d,  $J$  = 7.6 Hz, 2 H, Ar-H), 7.38-7.27 (m, 6 H, Ar-H), 7.27-7.18 (m, 2 H, Ar-H), 6.55 (t,  $J$  = 3.0 Hz, 1 H, =CH), 2.65-2.45 (m, 4 H,  $2 \times \text{CH}_2$ ), 2.28-2.18 (m, 1 H, CH), 1.95-1.81 (m, 2 H,  $\text{CH}_2$ ), 1.80-1.66 (m, 4 H,  $2 \times \text{CH}_2$ ), 1.65-1.60 (m, 1 H, one proton of  $\text{CH}_2$ ), 1.32-1.08 (m, 5 H,  $2 \times \text{CH}_2$  + one proton of  $\text{CH}_2$ );  $^{13}\text{C}$  NMR (100 MHz,  $\text{CDCl}_3$ ):  $\delta$  = 213.8, 206.4, 135.7, 134.3, 128.7, 128.5, 127.09, 127.06, 126.7, 126.0, 109.3, 98.2, 50.7, 39.8, 29.4, 28.4, 28.3, 25.7, 25.58, 25.56, 21.7; IR (neat,  $\text{cm}^{-1}$ ):  $\nu$  = 2927, 2852, 1932, 1703, 1596, 1492, 1446, 1406, 1372, 1312, 1239, 1192, 1143, 1073, 1027; MS (70 eV, EI)  $m/z$  (%): 344 ( $M^+$ , 2.61), 84 (100); HRMS Calcd for  $C_{25}H_{28}O$  ( $M^+$ ): 344.2140; Found: 344.2137.

(10) Preparation of 1,6,8-triphenylocta-6,7-dien-2-one (**3ja**) (wpl-2-72)

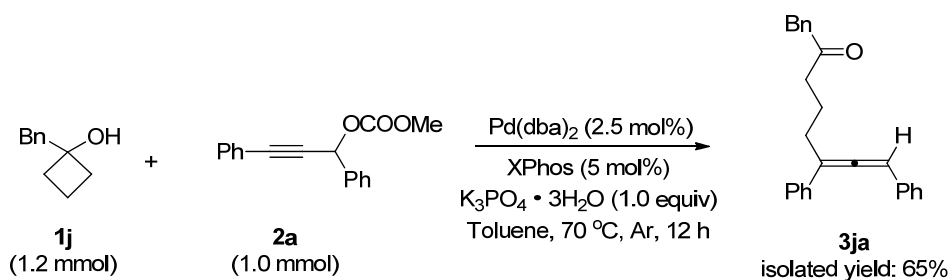

Following **Typical Procedure B**: the reaction of  $\text{Pd(dba)}_2$  (14.2 mg, 0.025 mmol),  $\text{XPhos}$  (23.6 mg, 0.05 mmol),  $\text{K}_3\text{PO}_4 \cdot 3\text{H}_2\text{O}$  (266.9 mg, 1.0 mmol), **1j** (liquid, 194.7 mg, 1.2 mmol)/toluene (1.0 mL), **2a** (266.5 mg, 1.0 mmol)/toluene (1.0 mL), and toluene (3.0 mL) for 12 h afforded **3ja** (230.4 mg, 65%) [eluent: petroleum ether/ethyl acetate = 80/1 (1.2 L)] as an oil:  $^1\text{H NMR}$  (400 MHz,  $\text{CDCl}_3$ )  $\delta$  = 7.41 (d,  $J$  = 7.2 Hz, 2 H, Ar-H), 7.36-7.16 (m, 11 H, Ar-H), 7.12 (d,  $J$  = 6.8 Hz, 2 H, Ar-H), 6.50 (t,  $J$  = 3.0 Hz, 1 H, =CH), 3.59 (s, 2 H,  $\text{CH}_2$  from Bn), 2.60-2.48 (m, 4 H,  $2 \times \text{CH}_2$ ), 1.95-1.80 (m, 2 H,  $\text{CH}_2$ );  $^{13}\text{C NMR}$  (100 MHz,  $\text{CDCl}_3$ ):  $\delta$  = 208.0, 206.3, 135.7, 134.3, 134.2, 129.3, 128.7, 128.6, 128.5, 127.1, 126.9, 126.7, 126.0, 109.2, 98.3, 98.2, 50.1, 41.3, 29.3, 21.8; IR (neat,  $\text{cm}^{-1}$ ):  $\nu$  = 3083, 3060, 3027, 2931, 2893, 1932, 1709, 1596, 1493, 1447, 1405, 1364, 1311, 1185, 1093, 1074, 1029; MS (70 eV, EI)  $m/z$  (%): 352 ( $\text{M}^+$ , 1.12), 149 (100); HRMS Calcd for  $\text{C}_{26}\text{H}_{24}\text{O}$  ( $\text{M}^+$ ): 352.1827; Found: 352.1829.

(11) Preparation of 1,5,7-triphenyl-3-benzyloxyhepta-5,6-dien-1-one (**3ka**) (wpl-4-194)

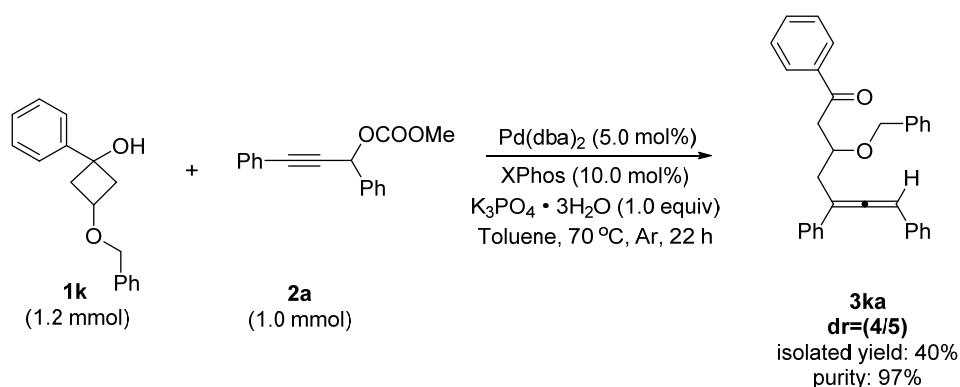

Following **Typical Procedure B**, the reaction of  $\text{Pd(dba)}_2$  (29.0 mg, 0.05 mmol),  $\text{XPhos}$  (47.4 mg, 0.10 mmol),  $\text{K}_3\text{PO}_4 \cdot 3\text{H}_2\text{O}$  (267.0 mg, 1.0 mmol), **1k** (liquid, 305.7 mg, 1.2 mmol)/toluene (2.5 mL), and **2a** (266.4 mg, 1.0 mmol)/toluene (2.5 mL) for



22 h afforded **3ka** (177.7 mg, 40%, 97%purity, dr = 4/5: determined by crude  $^1\text{H}$  NMR analysis) [eluent: petroleum ether/ethyl acetate = 150/1 (0.4 L) to 100/1 (0.8 L)] as an yellow oil:  $^1\text{H}$  NMR (400 MHz,  $\text{CDCl}_3$ )  $\delta$  = 7.89-7.79 (m, 2 H, Ar-H), 7.57-7.09 (m, 19 H, Ar-H), [6.53 (t,  $J$  = 2.8 Hz, 0.45 H), 6.49 (t,  $J$  = 2.6 Hz, 0.55 H), 1 H, =CH], [4.57 (s, 1.06 H), 4.53 (s, 0.85 H), 2 H,  $\text{OCH}_2$ ], 4.50-4.38 (m, 1 H, CH), 3.41-3.33 (m, 1 H, one proton of  $\text{CH}_2$ ), 3.27-3.17 (m, 1 H, one proton of  $\text{CH}_2$ ), 3.03-2.94 (m, 1 H, one proton of  $\text{CH}_2$ ), 2.94-2.82 (m, 1 H, one proton of  $\text{CH}_2$ ); IR (neat,  $\text{cm}^{-1}$ ):  $\nu$  = 3084, 3060, 3028, 2903, 2863, 1934, 1682, 1596, 1580, 1493, 1447, 1355, 1211, 1181, 1093, 1071, 1027, 1001; MS (70 eV, EI)  $m/z$  (%): 353 [ $(\text{M}^+ - \text{CH}_2\text{Ph})$ , 2.02], 233 (100); HRMS Calcd for  $\text{C}_{25}\text{H}_{21}\text{O}_2$  ( $\text{M}^+ - \text{CH}_2\text{Ph}$ ): 353.1542; Found: 353.1532; Anal. Calcd for  $\text{C}_{32}\text{H}_{28}\text{O}_2$ : C 86.45, H 6.35; Found: C 86.01, H 6.35.

(12) Preparation of 1-(2-(1,3-diphenylpropa-1,2-dienyl)phenyl)-3-phenylpropan-2-one (**3la**) (wpl-2-159)

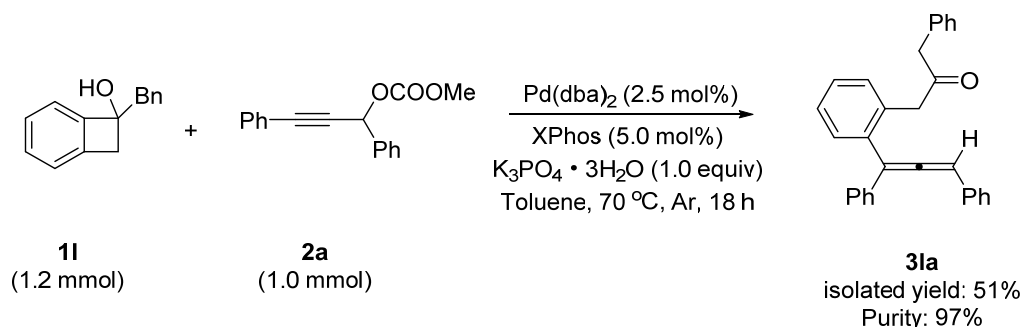

Following **Typical Procedure B**: the reaction of  $\text{Pd(dba)}_2$  (14.4 mg, 0.025 mmol), XPhos (23.7 mg, 0.05 mmol),  $\text{K}_3\text{PO}_4 \cdot 3\text{H}_2\text{O}$  (267.0 mg, 1.0 mmol), **1I** (liquid, 253.0 mg, 1.2 mmol)/toluene (1.0 mL), **2a** (266.1 mg, 1.0 mmol)/toluene (1.0 mL) and toluene (3.0 mL) for 18 h afforded **3la** (210.5 mg, 51%, 97% purity) [eluent: petroleum ether/ethyl acetate = 100:1 (0.4 L) to 80:1 (1.6 L) for the first run, then all the products (220.3 mg) was collected and treated with the second run of chromatography, eluent: petroleum ether/ethyl acetate = 100/1 (3.0 L)] as an oil:  $^1\text{H}$  NMR (400 MHz,  $\text{CDCl}_3$ ):  $\delta$  = 7.54-7.13 (m, 17 H, Ar-H), 6.97 (d,  $J$  = 6.0 Hz, 2 H, Ar-H), 6.49 (s, 1 H, =CH), 3.73 (s, 2 H,  $\text{CH}_2$ ), 3.43 (s, 2 H,  $\text{CH}_2$ );  $^{13}\text{C}$  NMR (100 MHz,  $\text{CDCl}_3$ ):  $\delta$  = 206.6, 205.1, 135.9, 135.8, 134.0, 133.6, 133.1, 131.3, 130.7,

129.4, 128.8, 128.7, 128.5, 128.1, 127.52, 127.47, 127.4, 127.1, 127.0, 126.8, 111.2, 97.6, 49.2, 46.9; IR (neat,  $\text{cm}^{-1}$ ):  $\nu = 3058, 3026, 1931, 1716, 1596, 1489, 1446, 1408, 1328, 1181, 1055, 1028, 1000$ ; MS (70 eV, EI)  $m/z$  (%): 400 [ $\text{M}^+$ , 8.15], 91 (100); HRMS Calcd for  $\text{C}_{30}\text{H}_{24}\text{O}$  ( $\text{M}^+$ ): 400.1827; Found: 400.1832.

(13) Preparation of 5-(4-acetylphenyl)-1,7-diphenylhepta-5,6-dien-1-one (**3ab**) (wpl-2-93)

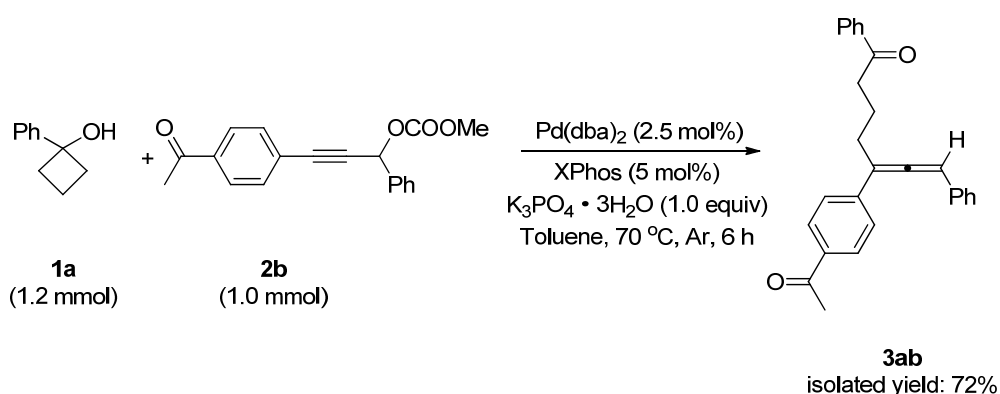

Following **Typical Procedure A**, the reaction of  $\text{Pd}(\text{dba})_2$  (14.4 mg, 0.025 mmol), XPhos (23.7 mg, 0.05 mmol),  $\text{K}_3\text{PO}_4 \cdot 3\text{H}_2\text{O}$  (266.4 mg, 1.0 mmol), **1a** (solid, 177.5 mg, 1.2 mmol), **2a** (308.1 mg, 1.0 mmol)/toluene (1.0 mL), and toluene (4.0 mL) for 6 h afforded **3ab** (272.0 mg, 72%) [eluent: petroleum ether/ethyl acetate = 50:1 (1.2 L) to 30:1 (0.4 L), then dichloromethane/ethyl acetate/petroleum ether = 1/2/40 (0.8 L)] as a yellow solid: m.p. = 85.3-86.1 °C (petroleum ether/dichloromethane);  $^1\text{H}$  NMR (400 MHz,  $\text{CDCl}_3$ )  $\delta = 7.98\text{-}7.80$  (m, 4 H, Ar-H), 7.63-7.47 (m, 3 H, Ar-H), 7.46-7.17 (m, 7 H, Ar-H), 6.62 (t,  $J = 2.8$  Hz, 1 H, =CH), 3.08 (t,  $J = 7.0$  Hz, 2 H,  $\text{CH}_2\text{CO}$ ), 2.78-2.62 (m, 2 H,  $\text{CH}_2$ ), 2.58 (s, 3 H,  $\text{COCH}_3$ ), 2.18-2.00 (m, 2 H,  $\text{CH}_2$ );  $^{13}\text{C}$  NMR (100 MHz,  $\text{CDCl}_3$ ):  $\delta = 207.5, 199.7, 197.5, 140.9, 136.9, 135.7, 133.6, 132.9, 128.8, 128.6, 128.5, 127.9, 127.4, 126.9, 126.1, 109.0, 98.8, 37.8, 29.5, 26.5, 22.2$ ; IR (neat,  $\text{cm}^{-1}$ ):  $\nu = 3059, 2957, 2894, 1925, 1677, 1596, 1578, 1495, 1448, 1428, 1408, 1372, 1359, 1343, 1309, 1286, 1263, 1197, 1157, 1114, 1074, 1014, 1001$ ; MS (70 eV, EI)  $m/z$  (%): 380 ( $\text{M}^+$ , 8.79), 262 (100); Anal. Calcd for  $\text{C}_{27}\text{H}_{24}\text{O}_2$ : C 85.23, H 6.36; Found: C 84.87, H 6.35.

(14) Preparation of 5-(2-chlorophenyl)-1,7-diphenylhepta-5,6-dien-1-one (**3ac**)  
(wpl-2-90)

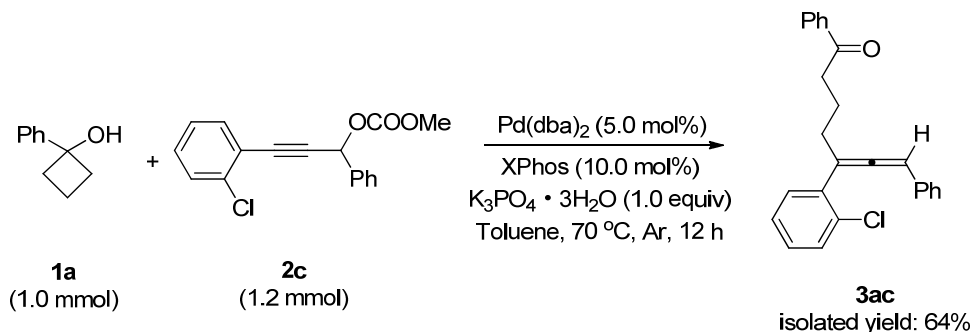

To a flame-dried Schlenk tube were added Pd(dba)<sub>2</sub> (28.7 mg, 0.05 mmol), XPhos (47.4 mg, 0.10 mmol), and K<sub>3</sub>PO<sub>4</sub> · 3H<sub>2</sub>O (266.4 mg, 1.0 mmol) under Ar atmosphere. Then **1a** (solid, 148.0 mg, 1.0 mmol), **2c** (355.0 mg, 1.2 mmol)/toluene (1.0 mL), and toluene (4.0 mL) were then added sequentially under Ar atmosphere at room temperature. The Schlenk tube was then stirred at 70 °C until completion of the reaction monitored by TLC and <sup>1</sup>H NMR (12 h). The crude reaction mixture was filtrated through a short column of silica gel (height: 3 cm,  $\Phi$ : 3.5 cm) eluted with ethyl acetate (60 mL). After evaporation, the residue was purified by chromatography on silica gel to afford **3ac** (240.3 mg, 64%) [eluent: petroleum ether/ethyl acetate = 100/1 (1.2 L)] as an oil: <sup>1</sup>H NMR (400 MHz, CDCl<sub>3</sub>)  $\delta$  = 7.95-7.82 (m, 2 H, Ar-H), 7.51 (t,  $J$  = 7.4 Hz, 1 H, Ar-H), 7.46-7.10 (m, 11 H, Ar-H), 6.34 (t,  $J$  = 3.0 Hz, 1 H, =CH), 3.06 (t,  $J$  = 7.2 Hz, 2 H, CH<sub>2</sub>CO), 2.72-2.53 (m, 2 H, CH<sub>2</sub>), 2.08-1.90 (m, 2 H, CH<sub>2</sub>); <sup>13</sup>C NMR (100 MHz, CDCl<sub>3</sub>):  $\delta$  = 204.5, 199.9, 136.9, 136.5, 134.3, 132.89, 132.85, 130.1, 129.9, 128.6, 128.5, 128.4, 128.0, 127.04, 127.01, 126.8, 107.6, 96.2, 37.8, 32.8, 22.2; IR (neat, cm<sup>-1</sup>):  $\nu$  = 3060, 2931, 1946, 1682, 1597, 1580, 1495, 1472, 1448, 1434, 1364, 1319, 1260, 1225, 1199, 1179, 1123, 1072, 1035, 1001; MS (70 eV, EI)  $m/z$  (%): 374 [ $M^+$ (<sup>37</sup>Cl), 0.50], 372 [ $M^+$ (<sup>35</sup>Cl), 1.58], 105 (100); HRMS Calcd for C<sub>25</sub>H<sub>21</sub><sup>35</sup>ClO ( $M^+$ ): 372.1281; Found: 372.1277.

(15) Preparation of 5-(2-(methoxycarbonyl)phenyl)-1,7-diphenylhepta-5,6-dien-1-one

**(3ad)** (wpl-2-112)

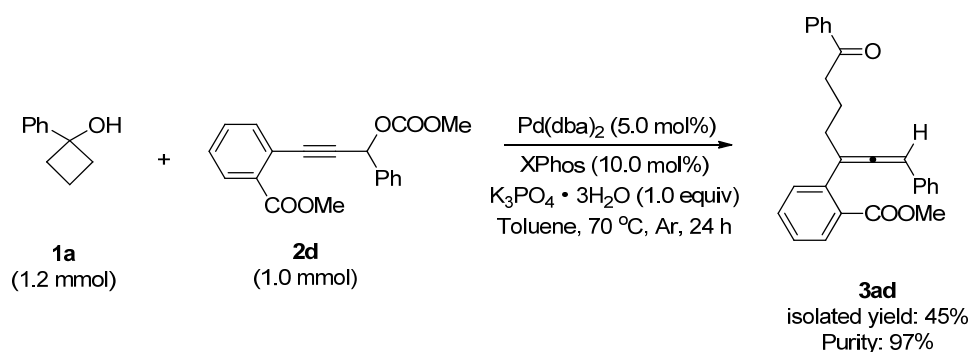

Following **Typical Procedure A**, the reaction of  $\text{Pd}(\text{dba})_2$  (28.7 mg, 0.05 mmol), XPhos (47.5 mg, 0.10 mmol),  $\text{K}_3\text{PO}_4 \cdot 3\text{H}_2\text{O}$  (268.0 mg, 1.0 mmol), **1a** (soild, 177.1 mg, 1.2 mmol), **2d** (324.0 mg, 1.0 mmol)/toluene (1.0 mL) and toluene (4.0 mL) for 24 h afforded **3ad** (183.4 mg, 45%, 97% purity) [eluent: petroleum ether/ethyl acetate = 40:1 (0.6 L) to 20:1 (0.4 L) for the first run, then all the products (204.5 mg) was collected and treated with the second run of chromatography, eluent: petroleum ether/ethyl acetate = 100/1 (3.0 L)] as an oil:  $^1\text{H}$  NMR (400 MHz,  $\text{CDCl}_3$ )  $\delta$  = 7.89 (d,  $J$  = 8.4 Hz, 2 H, Ar-H), 7.79 (dd,  $J$  = 7.6, 1.2 Hz, 1 H, Ar-H), 7.57-7.23 (m, 10 H, Ar-H), 7.22-7.14 (m, 1 H, Ar-H), 6.32 (t,  $J$  = 3.2 Hz, 1 H, =CH), 3.84 (s, 3 H, OMe), 3.09 (t,  $J$  = 7.2 Hz, 2 H,  $\text{CH}_2\text{CO}$ ), 2.67-2.48 (m, 2 H,  $\text{CH}_2$ ), 2.12-1.94 (m, 2 H,  $\text{CH}_2$ );  $^{13}\text{C}$  NMR (100 MHz,  $\text{CDCl}_3$ ):  $\delta$  = 203.7, 200.1, 168.0, 138.9, 137.0, 134.7, 132.8, 131.7, 130.1, 129.91, 129.86, 128.5, 128.4, 128.0, 127.2, 127.0, 126.9, 109.9, 96.3, 52.1, 37.8, 33.4, 22.3; IR (neat,  $\text{cm}^{-1}$ ):  $\nu$  = 3061, 3027, 2948, 1947, 1721, 1682, 1596, 1579, 1484, 1447, 1433, 1365, 1289, 1254, 1226, 1196, 1124, 1085, 1027, 1001; MS (70 eV, EI)  $m/z$  (%): 396 ( $\text{M}^+$ , 34.14), 105 (100); HRMS Calcd for  $\text{C}_{27}\text{H}_{24}\text{O}_3$  ( $\text{M}^+$ ): 396.1725; Found: 396.1729.

(16) Preparation of 5-hexyl-1,7-diphenylhepta-5,6-dien-1-one (**3ae**) (wpl-2-44)

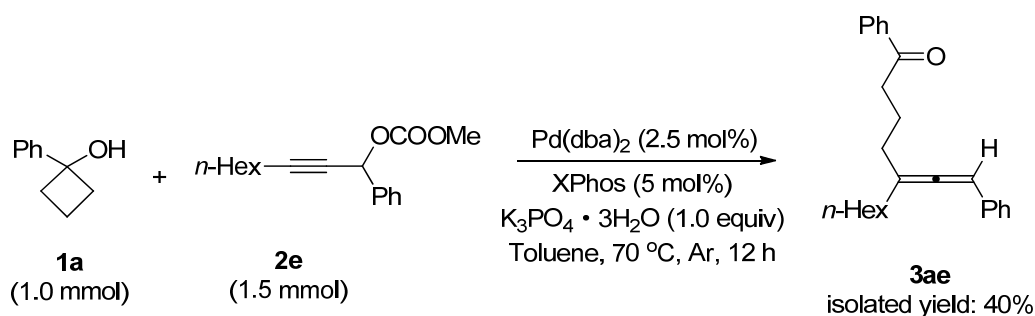

**Typical Procedure C:** To a flame-dried Schlenk tube were added  $\text{Pd}(\text{dba})_2$  (14.5 mg, 0.025 mmol),  $\text{XPhos}$  (23.9 mg, 0.05 mmol), and  $\text{K}_3\text{PO}_4 \cdot 3\text{H}_2\text{O}$  (266.7 mg, 1.0 mmol) under Ar atmosphere. **1a** (solid, 148.1 mg, 1.0 mmol), **2e** (410.2 mg, 1.5 mmol) in toluene (1.0 mL), and toluene (4.0 mL) were then added sequentially under Ar atmosphere at room temperature. The Schlenk tube was then stirred at 70 °C until completion of the reaction as monitored by TLC and  $^1\text{H}$  NMR (12 h). The crude reaction mixture was filtrated through a short column of silica gel (height: 3 cm,  $\Phi$ : 3.5 cm) eluted with ethyl acetate (60 mL). After evaporation, the residue was purified by chromatography on silica gel to afford **3ae** (138.5 mg, 40%) [eluent: petroleum ether/ethyl acetate = 80:1 (0.8 L) for the first run, then all the product was collected and treated with the second run of chromatography, eluent: petroleum ether/diethyl ether = 250:1 (2.0 L)] as an oil:  $^1\text{H}$  NMR (400 MHz,  $\text{CDCl}_3$ )  $\delta$  = 7.89-7.83 (m, 2 H, Ar-H), 7.51 (t,  $J$  = 7.4 Hz, 1 H, Ar-H), 7.39 (t,  $J$  = 7.8 Hz, 2 H, Ar-H), 7.32-7.23 (m, 4 H, Ar-H), 7.21-7.12 (m, 1 H, Ar-H), 6.15 (quint,  $J$  = 3.0 Hz, 1 H, =CH), 3.05-2.92 (m, 2 H,  $\text{CH}_2$ ), 2.25-2.16 (m, 2 H,  $\text{CH}_2$ ), 2.15-2.04 (m, 2 H,  $\text{CH}_2$ ), 2.02-1.85 (m, 2 H,  $\text{CH}_2$ ), 1.54-1.40 (m, 2 H,  $\text{CH}_2$ ), 1.38-1.18 (m, 6 H,  $3 \times \text{CH}_2$ ), 0.85 (t,  $J$  = 7.0 Hz, 3 H,  $\text{CH}_3$ );  $^{13}\text{C}$  NMR (100 MHz,  $\text{CDCl}_3$ ):  $\delta$  = 202.2, 200.2, 137.0, 135.9, 132.8, 128.51, 128.46, 128.0, 126.4, 108.1, 95.7, 38.0, 32.7, 32.2, 31.6, 29.1, 27.6, 22.6, 22.0, 14.0; IR (neat,  $\text{cm}^{-1}$ ):  $\nu$  = 3030, 2953, 2925, 2854, 1946, 1685, 1597, 1580, 1495, 1448, 1406, 1364, 1260, 1230, 1209, 1179, 1072, 1001; MS (70 eV, EI)  $m/z$  (%): 346 ( $\text{M}^+$ , 4.35), 105 (100); HRMS Calcd for  $\text{C}_{25}\text{H}_{30}\text{O}$  ( $\text{M}^+$ ): 346.2297; Found: 346.2293.

(17) Preparation of 7-(4-chlorophenyl)-1,5-diphenylhepta-5,6-dien-1-one (**3af**)

(wpl-2-26)

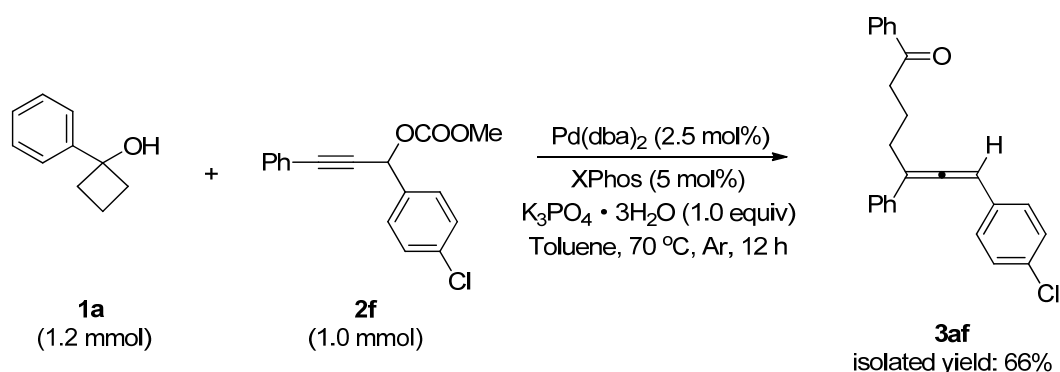

Following **Typical Procedure A**, the reaction of Pd(dba)<sub>2</sub> (14.5 mg, 0.025 mmol), XPhos (23.9 mg, 0.05 mmol), K<sub>3</sub>PO<sub>4</sub> · 3H<sub>2</sub>O (266.4 mg, 1.0 mmol), **1a** (soild, 177.9 mg, 1.2 mmol), **2f** (300.7 mg, 1.0 mmol)/toluene (1.0 mL), and toluene (4.0 mL) for 12 h afforded **3af** (246.0 mg, 66%) [eluent: petroleum ether/ethyl acetate = 80/1 (0.8 L)] as a white solid: m.p. = 96.5-97.0 °C (petroleum ether/dichloromethane); <sup>1</sup>H NMR (400 MHz, CDCl<sub>3</sub>) δ = 7.89-7.82 (m, 2 H, Ar-H), 7.58-7.49 (m, 1 H, Ar-H), 7.48-7.37 (m, 4 H, Ar-H), 7.36-7.28 (m, 2 H, Ar-H), 7.27-7.20 (m, 5 H, Ar-H), 6.52 (t, 1 H, *J* = 3.0 Hz, =CH), 3.06 (t, 2 H, *J* = 7.0 Hz, CH<sub>2</sub>CO), 2.75-2.60 (m, 2 H, CH<sub>2</sub>), 2.16-1.98 (m, 2 H, CH<sub>2</sub>); <sup>13</sup>C NMR (100 MHz, CDCl<sub>3</sub>): δ = 206.6, 199.8, 136.9, 135.4, 133.0, 132.7, 128.9, 128.6, 128.5, 127.9, 127.3, 126.1, 109.8, 97.4, 37.9, 29.6, 22.1; IR (neat, cm<sup>-1</sup>): ν = 3057, 2954, 2894, 1934, 1716, 1685, 1595, 1578, 1489, 1448, 1433, 1406, 1371, 1345, 1329, 1311, 1265, 1232, 1197, 1176, 1087, 1072, 1030, 1010, 1002; MS (70 eV, EI) *m/z* (%): 374 [M<sup>+</sup>(<sup>37</sup>Cl), 1.10], 372 [M<sup>+</sup>(<sup>35</sup>Cl), 3.29], 220 (100); Anal. Calcd for C<sub>25</sub>H<sub>21</sub>OCl: C 80.53, H 5.68; Found: C 80.54, H 5.77.

(18) Preparation of 7-(3,4-dichlorophenyl)-1,5-diphenylhepta-5,6-dien-1-one (**3ag**)  
(wpl-2-104)

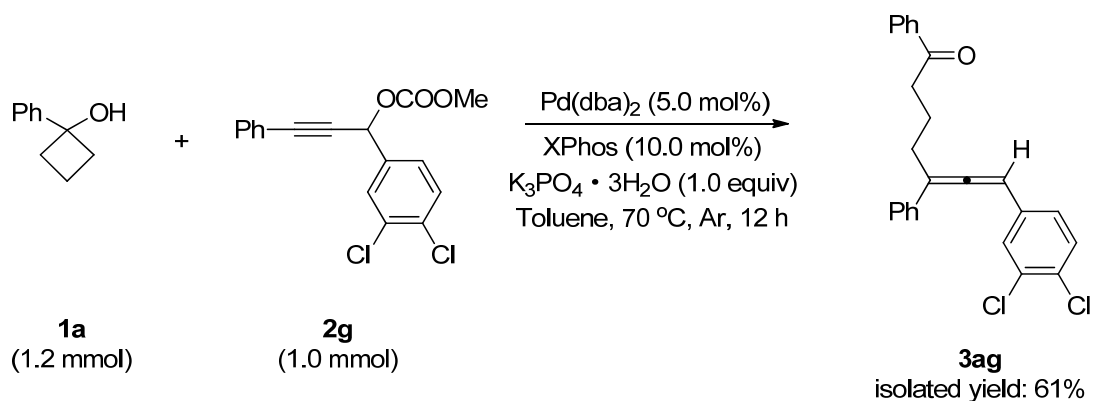

Following **Typical Procedure A**, the reaction of  $\text{Pd(dba)}_2$  (28.6 mg, 0.05 mmol), XPhos (47.7 mg, 0.10 mmol),  $\text{K}_3\text{PO}_4 \cdot 3\text{H}_2\text{O}$  (266.3 mg, 1.0 mmol), **1a** (solid, 178.0 mg, 1.2 mmol), **2g** (335.0 mg, 1.0 mmol)/toluene (1.0 mL), and toluene (4.0 mL) for 12 h afforded **3ag** (247.8 mg, 61%) [eluent: petroleum ether/ethyl acetate = 60:1 (0.8 L) to 40:1 (0.8 L), finally re-crystallized (petroleum ether/dichloromethane) to provide the desired **3ag** as a white solid]: m.p. = 113.4-114.3 °C (petroleum ether/dichloromethane);  $^1\text{H}$  NMR (400 MHz,  $\text{CDCl}_3$ )  $\delta$  = 7.87 (d,  $J$  = 6.8 Hz, 2 H, Ar-H), 7.70-7.20 (m, 10 H, Ar-H), 7.13 (dd,  $J_1$  = 8.4 Hz,  $J_2$  = 2.0 Hz, 1 H, Ar-H), 6.46 (t,  $J$  = 2.8 Hz, 1 H, =CH), 3.06 (t,  $J$  = 7.0 Hz, 2 H,  $\text{CH}_2\text{CO}$ ), 2.81-2.55 (m, 2 H,  $\text{CH}_2$ ), 2.20-1.94 (m, 2 H,  $\text{CH}_2$ );  $^{13}\text{C}$  NMR (100 MHz,  $\text{CDCl}_3$ ):  $\delta$  = 206.8, 199.6, 136.8, 135.0, 134.8, 133.0, 132.8, 130.7, 130.6, 128.7, 128.5, 128.2, 127.9, 127.5, 126.1, 125.9, 110.3, 96.6, 37.8, 29.5, 22.0; IR (neat,  $\text{cm}^{-1}$ ):  $\nu$  = 3064, 2951, 2895, 1938, 1686, 1596, 1555, 1492, 1474, 1448, 1433, 1418, 1406, 1373, 1359, 1343, 1329, 1312, 1275, 1265, 1231, 1199, 1179, 1158, 1128, 1073, 1057, 1026, 1002; MS (70 eV, EI)  $m/z$  (%): 408 [ $\text{M}^+(\text{}^{37,35}\text{Cl}_2)$ , 1.09], 406 [ $\text{M}^+(\text{}^{35,35}\text{Cl}_2)$ , 1.76], 220 (100); Anal. Calcd for  $\text{C}_{25}\text{H}_{20}\text{Cl}_2\text{O}$ : C 73.72, H 4.95; Found: C 73.64, H 4.95.

(19) Preparation of 7-(2-cyanophenyl)-1,5-diphenylhepta-5,6-dien-1-one (**3ah**) (wpl-2-111)

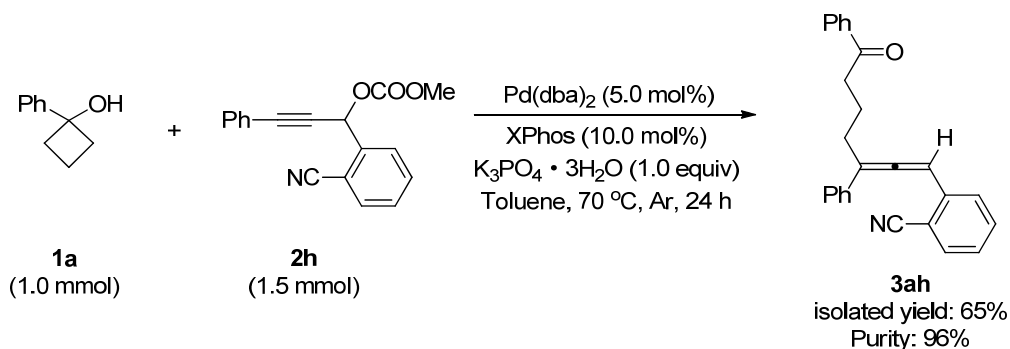

Following **Typical Procedure C**, the reaction of Pd(dba)<sub>2</sub> (28.6 mg, 0.05 mmol), XPhos (47.5 mg, 0.10 mmol), K<sub>3</sub>PO<sub>4</sub> · 3H<sub>2</sub>O (266.2 mg, 1.0 mmol), **1a** (soild, 148.0 mg, 1.0 mmol), **2h** (436.0 mg, 1.5 mmol)/toluene (1.0 mL), and toluene (4.0 mL) for 24 h afforded **3ah** (244.0 mg, 65%, 96% purity) [eluent: petroleum ether/ethyl acetate = 40:1 (0.6 L) to 30:1 (0.4 L) to 20:1 (0.8 L) for the first run, then all the products (276.0 mg) was collected and treated with the second run of chromatography, eluent: petroleum ether/ethyl acetate = 80:1 (1.2 L) to 40:1 (1.2 L)] as an oil: <sup>1</sup>H NMR (400 MHz, CDCl<sub>3</sub>) δ = 7.91 (d, *J* = 7.2 Hz, 2 H, Ar-H), 7.61 (dd, *J*<sub>1</sub> = 7.6 Hz, *J*<sub>2</sub> = 0.8 Hz, 1 H, Ar-H), 7.58-7.49 (m, 2 H, Ar-H), 7.48-7.38 (m, 5 H, Ar-H), 7.37-7.30 (m, 2 H, Ar-H), 7.28-7.20 (m, 2 H, Ar-H), 6.93 (t, *J* = 3.0 Hz, 1 H, =CH), 3.08 (t, *J* = 7.0 Hz, 2 H, CH<sub>2</sub>CO), 2.82-2.63 (m, 2 H, CH<sub>2</sub>), 2.14-2.00 (m, 2 H, CH<sub>2</sub>); <sup>13</sup>C NMR (100 MHz, CDCl<sub>3</sub>): δ = 208.0, 199.6, 138.1, 136.8, 134.6, 133.04, 132.96, 132.7, 128.6, 128.5, 127.9, 127.6, 127.2, 127.0, 126.2, 117.6, 110.9, 110.2, 95.1, 37.8, 29.6, 22.2; IR (neat, cm<sup>-1</sup>): ν = 3059, 2931, 2221, 1932, 1682, 1596, 1579, 1485, 1446, 1407, 1364, 1296, 1260, 1226, 1201, 1180, 1160, 1089, 1074, 1029, 1001; MS (70 eV, EI) *m/z* (%): 363 [M<sup>+</sup>, 10.98], 105 (100); HRMS Calcd for C<sub>26</sub>H<sub>21</sub>NO (M<sup>+</sup>): 363.1623; Found: 363.1625.

(20) Preparation of 7-(2-methoxyphenyl)-1,5-diphenylhepta-5,6-dien-1-one (**3ai**) (wpl-4-184)



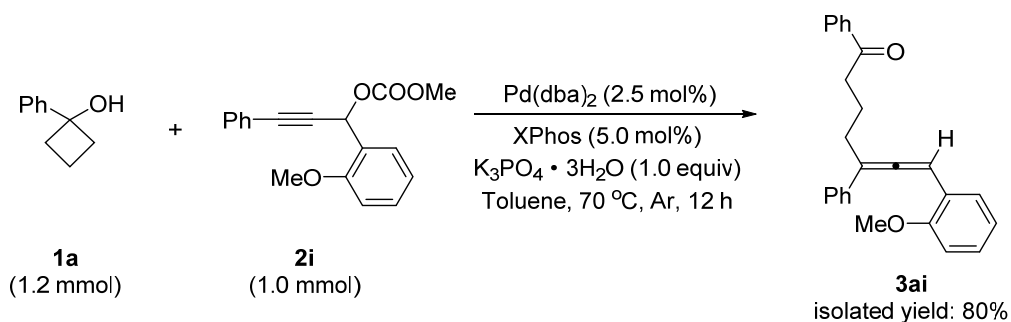

Following **Typical Procedure A**, the reaction of  $\text{Pd(dba)}_2$  (14.3 mg, 0.025 mmol), XPhos (23.6 mg, 0.05 mmol),  $\text{K}_3\text{PO}_4 \cdot 3\text{H}_2\text{O}$  (266.7 mg, 1.0 mmol), **1a** (soild, 177.6 mg, 1.2 mmol), **2i** (soild, 297.0 mg, 1.0 mmol), and toluene (5.0 mL) for 12 h afforded **3ai** (294.8 mg, 80%) [eluent: petroleum ether/ethyl acetate = 80:1 (0.4 L) to 40:1 (0.8 L)] as an oil:  $^1\text{H}$  NMR (400 MHz,  $\text{CDCl}_3$ )  $\delta$  = 7.88-7.83 (m, 2 H, Ar-H), 7.54-7.44 (m, 3 H, Ar-H), 7.42-7.35 (m, 3 H, Ar-H), 7.34-7.28 (m, 2 H, Ar-H), 7.24-7.15 (m, 2 H, Ar-H), 6.96 (t,  $J$  = 3.0 Hz, 1 H, =CH), 6.91-6.84 (m, 2 H, Ar-H), 3.83 (s, 3 H,  $\text{OCH}_3$ ), 3.06 (t,  $J$  = 7.2 Hz, 2 H,  $\text{CH}_2\text{CO}$ ), 2.76-2.59 (m, 2 H,  $\text{CH}_2$ ), 2.17-2.00 (m, 2 H,  $\text{CH}_2$ );  $^{13}\text{C}$  NMR (100 MHz,  $\text{CDCl}_3$ ):  $\delta$  = 206.9, 200.1, 156.2, 137.0, 136.1, 132.8, 128.5, 128.2, 128.0, 127.6, 126.9, 126.0, 122.7, 120.8, 111.1, 108.3, 92.2, 55.5, 38.0, 29.6, 22.3; IR (neat,  $\text{cm}^{-1}$ ):  $\nu$  = 3059, 3025, 3003, 2935, 2900, 2837, 1932, 1683, 1596, 1581, 1492, 1463, 1448, 1391, 1365, 1287, 1245, 1200, 1171, 1159, 1103, 1074, 1048, 1027, 1001; MS (70 eV, EI)  $m/z$  (%): 353 [ $(\text{M}^+ - \text{CH}_3)$ , 2.88], 220 (100); HRMS Calcd for  $\text{C}_{26}\text{H}_{24}\text{O}_2$  ( $\text{M}^+$ ): 368.1771; Found: 368.1769.

(21) Preparation of 7-methyl-1,5-diphenyldeca-5,6-dien-1-one (**3aj**) (wpl-2-128)

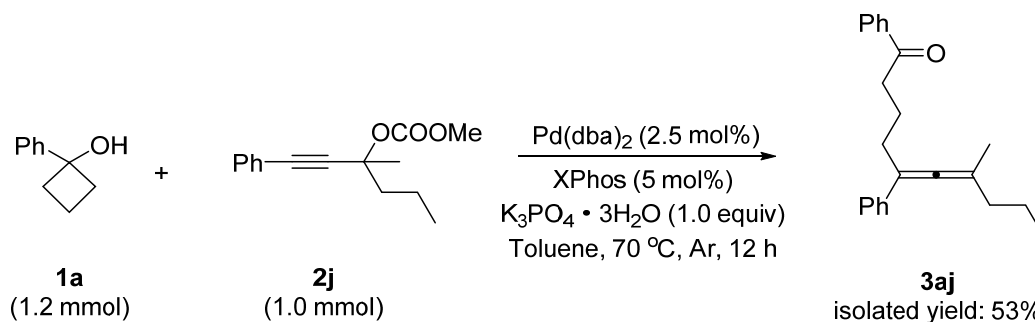

Following **Typical Procedure A**, the reaction of  $\text{Pd(dba)}_2$  (14.4 mg, 0.025 mmol), XPhos (23.7 mg, 0.05 mmol),  $\text{K}_3\text{PO}_4 \cdot 3\text{H}_2\text{O}$  (266.9 mg, 1.0 mmol), **1a** (soild, 177.6 mg, 1.2 mmol), **2j** (246.0 mg, 1.0 mmol)/toluene (1.0 mL), and toluene (4.0 mL) for

12 h afforded **3aj** (169.2 mg, 53%) [eluent: petroleum ether/ethyl acetate = 100:1 (0.8 L)] as an oil:  $^1\text{H}$  NMR (400 MHz,  $\text{CDCl}_3$ )  $\delta$  = 7.98-7.88 (m, 2 H, Ar-H), 7.53 (t,  $J$  = 7.2 Hz, 1 H, Ar-H), 7.47-7.34 (m, 4 H, Ar-H), 7.29 (t,  $J$  = 7.8 Hz, 2 H, Ar-H), 7.16 (t,  $J$  = 7.6 Hz, 1 H, Ar-H), 3.10-3.02 (m, 2 H,  $\text{CH}_2\text{CO}$ ), 2.52 (t,  $J$  = 7.2 Hz, 2 H,  $\text{CH}_2\text{C}=\text{C}$ ), 2.10-1.92 (m, 4 H,  $2\times\text{CH}_2$ ), 1.78 (s, 3 H, Me), 1.55-1.40 (m, 2 H,  $\text{CH}_2$ ), 0.91 (t,  $J$  = 7.4 Hz, 3 H,  $\text{CH}_3$ );  $^{13}\text{C}$  NMR (100 MHz,  $\text{CDCl}_3$ ):  $\delta$  = 201.4, 200.2, 138.1, 137.1, 132.8, 128.5, 128.2, 128.0, 126.1, 125.9, 103.9, 103.2, 38.1, 36.5, 29.7, 22.5, 21.0, 18.9, 14.0; IR (neat,  $\text{cm}^{-1}$ ):  $\nu$  = 3059, 2956, 2930, 2870, 1947, 1684, 1597, 1580, 1492, 1447, 1407, 1366, 1319, 1225, 1198, 1179, 1156, 1073, 1028, 1001; MS (70 eV, EI)  $m/z$  (%): 318 ( $\text{M}^+$ , 3.58), 220 (100); HRMS Calcd for  $\text{C}_{23}\text{H}_{26}\text{O}$  ( $\text{M}^+$ ): 318.1984; Found: 318.1982.

(22) Preparation of 1,5-diphenylhepta-5,6-dien-1-one (**3ak**) (wpl-4-182)

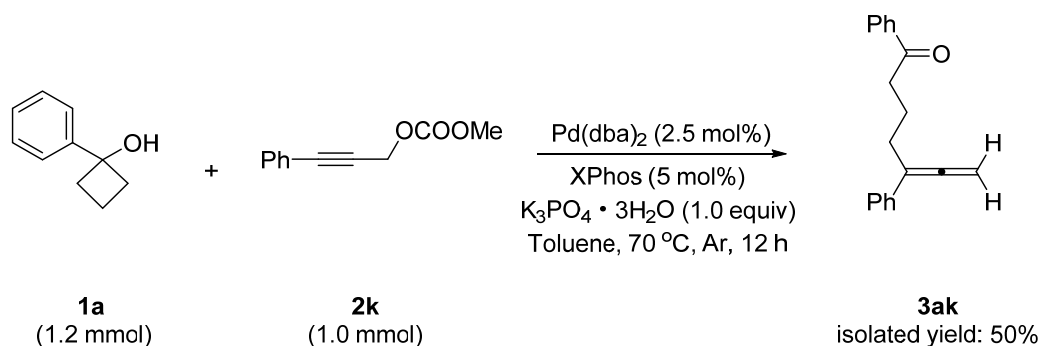

Following **Typical Procedure A**, the reaction of  $\text{Pd}(\text{dba})_2$  (14.6 mg, 0.025 mmol),  $\text{XPhos}$  (24.0 mg, 0.05 mmol),  $\text{K}_3\text{PO}_4 \cdot 3\text{H}_2\text{O}$  (266.4 mg, 1.0 mmol), **1a** (soild, 177.9 mg, 1.2 mmol), **2k** (190.4 mg, 1.0 mmol)/toluene (1.0 mL), and toluene (4.0 mL) for 12 h afforded **3ak** (131.5 mg, 50%) [eluent: petroleum ether/ethyl acetate = 80/1 (0.8 L)] as an oil:  $^1\text{H}$  NMR (400 MHz,  $\text{CDCl}_3$ )  $\delta$  = 7.95 (d,  $J$  = 8.0 Hz, 2 H, Ar-H), 7.58-7.50 (m, 1 H, Ar-H), 7.48-7.36 (m, 4 H, Ar-H), 7.32 (t,  $J$  = 7.6 Hz, 2 H, Ar-H), 7.20 (t,  $J$  = 7.4 Hz, 1 H, Ar-H), 5.08 (t,  $J$  = 3.2 Hz, 2 H, =CH), 3.07 (t,  $J$  = 7.2 Hz, 2 H,  $\text{CH}_2\text{CO}$ ), 2.58-2.49 (m, 2 H,  $\text{CH}_2$ ), 2.04 (quint,  $J$  = 7.3 Hz, 2 H,  $\text{CH}_2$ );  $^{13}\text{C}$  NMR (100 MHz,  $\text{CDCl}_3$ ):  $\delta$  = 208.5, 200.1, 137.0, 136.1, 132.9, 128.5, 128.4, 128.0, 126.7, 126.0, 104.4, 78.5, 37.9, 29.0, 22.3; IR (neat,  $\text{cm}^{-1}$ ):  $\nu$  = 3084, 3058, 3030, 1939, 1682,

1597, 1580, 1494, 1448, 1407, 1365, 1227, 1199, 1180, 1075, 1028, 1001; MS (70 eV, EI)  $m/z$  (%): 262 ( $M^+$ , 4.03), 105 (100); HRMS Calcd for  $C_{19}H_{18}O$  ( $M^+$ ): 262.1352; Found: 262.1348.

#### 4. Gram scale synthesis of 7-(4-chlorophenyl)-1,5-diphenylhepta-5,6-dien-1-one (3af) (wpl-2-117)

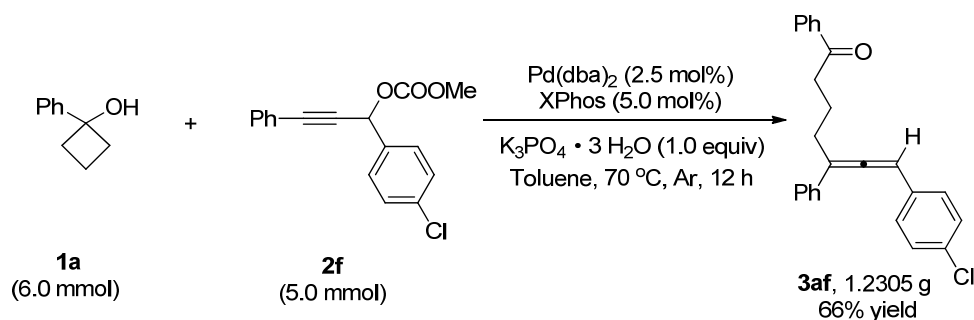

Following **Typical Procedure A**, the reaction of  $Pd(dba)_2$  (71.9 mg, 0.125 mmol), XPhos (119.2 mg, 0.250 mmol),  $K_3PO_4 \cdot 3H_2O$  (1332.0 mg, 5.0 mmol), **1a** (solid, 888.0 mg, 6.0 mmol), **2f** (1502.7 mg, 5.0 mmol)/toluene (5.0 mL), and toluene (20.0 mL) for 12 h afforded **3af** (1.2305 g, 66%) [eluent: petroleum ether/ethyl acetate = 40/1 (0.8 L) to 30/1 (1.2L)] as a white solid;  $^1H$  NMR (400 MHz,  $CDCl_3$ )  $\delta$  = 7.85 (d,  $J$  = 7.6 Hz, 2 H, Ar-H), 7.52 (t,  $J$  = 7.2 Hz, 1 H, Ar-H), 7.48-7.36 (m, 4 H, Ar-H), 7.32 (t,  $J$  = 7.6 Hz, 2 H, Ar-H), 7.27-7.17 (m, 5 H, Ar-H), 6.50 (t,  $J$  = 2.8 Hz, 1 H, =CH), 3.04 (t,  $J$  = 7.0 Hz, 2 H,  $CH_2CO$ ), 2.75-2.60 (m, 2 H,  $CH_2$ ), 2.16-1.97 (m, 2 H,  $CH_2$ );  $^{13}C$  NMR (100 MHz,  $CDCl_3$ ):  $\delta$  = 206.5, 199.7, 136.8, 135.4, 132.9, 132.6, 128.9, 128.6, 128.5, 127.9, 127.3, 126.0, 109.7, 97.3, 37.8, 29.5, 22.1.

#### 5. Transformations of product 3af.

(1) Reduction with  $NaBH_4$  for the synthesis of 7-(4-chlorophenyl)-1,5-diphenyl hepta-5,6-dien-1-ol (**4**) (wpl-2-133, wpl-3-157)

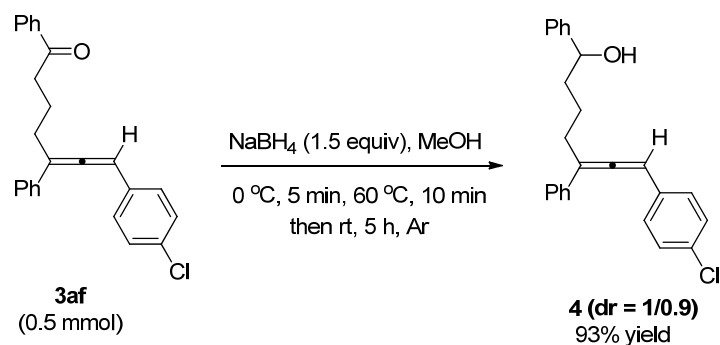

To a flame-dried schlenk tube were added **3af** (186.4 mg, 0.5 mmol) and MeOH (5.0 mL). The reaction was cooled to  $0\text{ }^\circ\text{C}$  and  $\text{NaBH}_4$  (28.7 mg, 0.75 mmol, 1.5 equiv) was added in portion. Then, the reaction was stirred at  $0\text{ }^\circ\text{C}$  for 5 min and  $60\text{ }^\circ\text{C}$  for 10 min. The resulting mixture was allowed to cool to room temperature and stirred at room temperature for 5 h. The reaction was then cooled to  $0\text{ }^\circ\text{C}$  and quenched with water (10 mL). The aqueous layer was extracted by EtOAc (10 mL  $\times$  3). The combined organic phases was washed with brine (20 mL), dried over  $\text{Na}_2\text{SO}_4$ , filtered, and concentrated under reduced pressure. After evaporation, the residue was purified by chromatography on silica gel [eluent: petroleum ether/ethyl acetate = 40/1 (0.8 L) to 20/1 (1.0 L)] to afford **4** (173.9 mg, 93%, dr = 1/0.9: determined by quantitative  $^{13}\text{C}$  NMR analysis) as a colorless oil:  $^1\text{H}$  NMR (400 MHz,  $\text{CDCl}_3$ )  $\delta$  = 7.39 (d,  $J$  = 7.6 Hz, 2 H, ArH), 7.33-7.02 (m, 12 H, ArH), 6.50-6.42 (m, 1 H, =CH), 4.67-4.54 (m, 1 H, OCH), 2.65-2.49 (m, 2 H,  $\text{CH}_2$ ), 2.01-1.52 (m, 5 H,  $2\times\text{CH}_2 + \text{OH}$ ); IR (neat,  $\text{cm}^{-1}$ ):  $\nu$  = 3577, 3372, 3028, 2930, 1932, 1674, 1596, 1489, 1451, 1381, 1308, 1215, 1089, 1028, 1012; MS (70 eV, EI)  $m/z$  (%): 376 [ $\text{M}^+(\text{^{37}Cl})$ , 11.31], 374 [ $\text{M}^+(\text{^{35}Cl})$ , 31.87], 105 (100); Anal. Calcd for  $\text{C}_{25}\text{H}_{23}\text{ClO}$ : C, 80.09; H, 6.18; Found: C, 79.88; H, 6.50.

(2) Reaction with a Wittig reagent for the synthesis of 1-(4-chlorophenyl)-3,7-diphenyl-octa-1,2,7-triene (**5**)<sup>[3]</sup> (wpl-2-174)

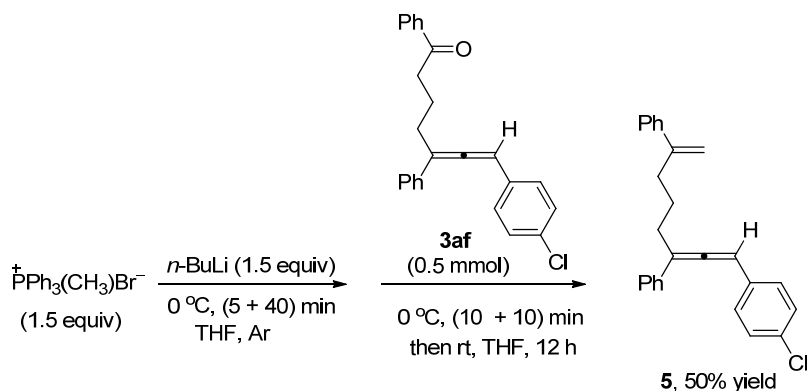

To a mixture of methyltriphenylphosphonium bromide (267.0 mg, 0.75 mmol, 1.5 equiv) in dry THF (5 mL) at  $0\text{ }^\circ\text{C}$  (ice/water bath) was slowly added  $n\text{-BuLi}$  (2.5 M in hexane, 0.3 mL, 0.75 mmol, 1.5 equiv) within 5 minutes under Ar atmosphere with stirring and the solution was stirred at  $0\text{ }^\circ\text{C}$  vigorously for 40 minutes. A solution of **3af** (186.5 mg, 0.5 mmol, 1.0 equiv) in dry THF (2.5 mL) was then added dropwise at  $0\text{ }^\circ\text{C}$  to the resulting mixture over a period of 10 minutes. After being stirred at  $0\text{ }^\circ\text{C}$  for another 10 minutes, the ice/water bath was removed. After 12 hours at room temperature, the reaction was quenched by addition of a saturated solution of  $\text{NH}_4\text{Cl}$  (aq, 15 mL) and extracted with EtOAc (15 mL  $\times$  3), and the combined organic phase was dried by  $\text{Na}_2\text{SO}_4$ . The solvent was then removed in vacuo to give a crude mixture, which was purified by silica gel column chromatography [petroleum ether/ethyl acetate = 200/1 (0.6 L)] to afford **5** (92.7 mg, 50%) as an oil:  $^1\text{H}$  NMR (400 MHz,  $\text{CDCl}_3$ ):  $\delta$  = 7.50-7.10 (m, 14 H, Ar-H), 6.45 (t,  $J$  = 2.6 Hz, 1 H, =CH), 5.27 (s, 1 H, one proton of = $\text{CH}_2$ ), 5.03 (s, 1 H, one proton of = $\text{CH}_2$ ), 2.70-2.48 (m, 4 H,  $2\times\text{CH}_2$ ), 1.85-1.66 (m, 2 H,  $\text{CH}_2$ );  $^{13}\text{C}$  NMR (100 MHz,  $\text{CDCl}_3$ ):  $\delta$  = 206.5, 147.9, 141.0, 135.6, 133.0, 132.5, 128.8, 128.5, 128.2, 127.9, 127.3, 127.2, 126.1, 126.0, 112.6, 110.0, 97.1, 34.9, 29.5, 26.2; IR (neat,  $\text{cm}^{-1}$ ):  $\nu$  = 3104, 3083, 3052, 2932, 2898, 2828, 1935, 1624, 1595, 1573, 1489, 1450, 1434, 1382, 1349, 1328, 1292, 1276, 1216, 1195, 1161, 1088, 1072, 1027, 1012; MS (70 eV, EI)  $m/z$  (%): 372 [ $\text{M}^+(\text{Cl})$ , 11.41], 370 [ $\text{M}^+(\text{Cl})$ , 31.85], 205 (100); HRMS Calcd for  $\text{C}_{26}\text{H}_{23}^{35}\text{Cl}$  ( $\text{M}^+$ ): 370.1488; Found: 370.1490.

## References:

- [1] a) K. Jia, F. Zhang, H. Huang, Y. Chen, *J. Am. Chem. Soc.* 2016, **138**, 1514; b) H. Zeng, P. Pan, J. Chen, H. Gong, C. Jun, *Eur. J. Org. Chem.* 2017, 1070; c) B. M. Casey, C. A. Eakin, R. A. Flowers II, *Tetrahedron Lett.* 2009, **50**, 1264; d) C. S. A. Antunes, M. Bietti, O. Lanzalunga, M. Salamone, *J. Org. Chem.* 2004, **69**, 5281.
- [2] a) R. Shen, J. Yang, S. Zhu, C. Chen, L. Wu, *Adv. Synth. Catal.* 2015, **357**, 1259; b) P. Wu, M. Jia, W. Lin, S. Ma, *Org. Lett.* 2018, **20**, 554; c) M. Xiong, H. Hu, X. Hu, Y. Liu, *Org. Lett.* 2018, **20**, 3661; d) H. Luo, Y. Yu, S. Ma, *Org. Chem. Front.* 2016, **3**, 1705; e) A. Zhang, S. Ma, *J. Org. Chem.* 2002, **67**, 2287; f) G. Gangadhararao, R. Kotikalapudi, M. N. Reddy, K. C. K. Swamy, *Beilstein J. Org. Chem.* 2014, **10**, 996. g) J. Ying, C. Zhou, X. Wu, *Org. Biomol. Chem.* 2018, **16**, 1065.
- [3] K.-P. Wang, S. Y. Yun, D. Lee, D. J. Wink, *J. Am. Chem. Soc.* 2009, **131**, 15114.

7.448  
7.445  
7.425  
7.361  
7.343  
7.332  
7.321  
7.275  
7.271  
7.267  
7.256

4.431  
3.851  
3.834  
3.818  
3.801  
3.784

2.933  
2.916  
2.909  
2.901  
2.884  
2.581  
2.460  
2.444  
2.436  
2.428  
2.411

0.000

wpl-4-190H  
Pulse length = 10.000 usec  
Recycle delay = 20.000 sec  
NA = 4  
Solvent = CDCl3  
PTS1d = 65536  
F1 = 400.130035 MHz  
F2 = 1.000000 MHz

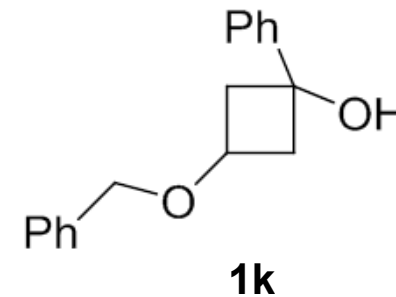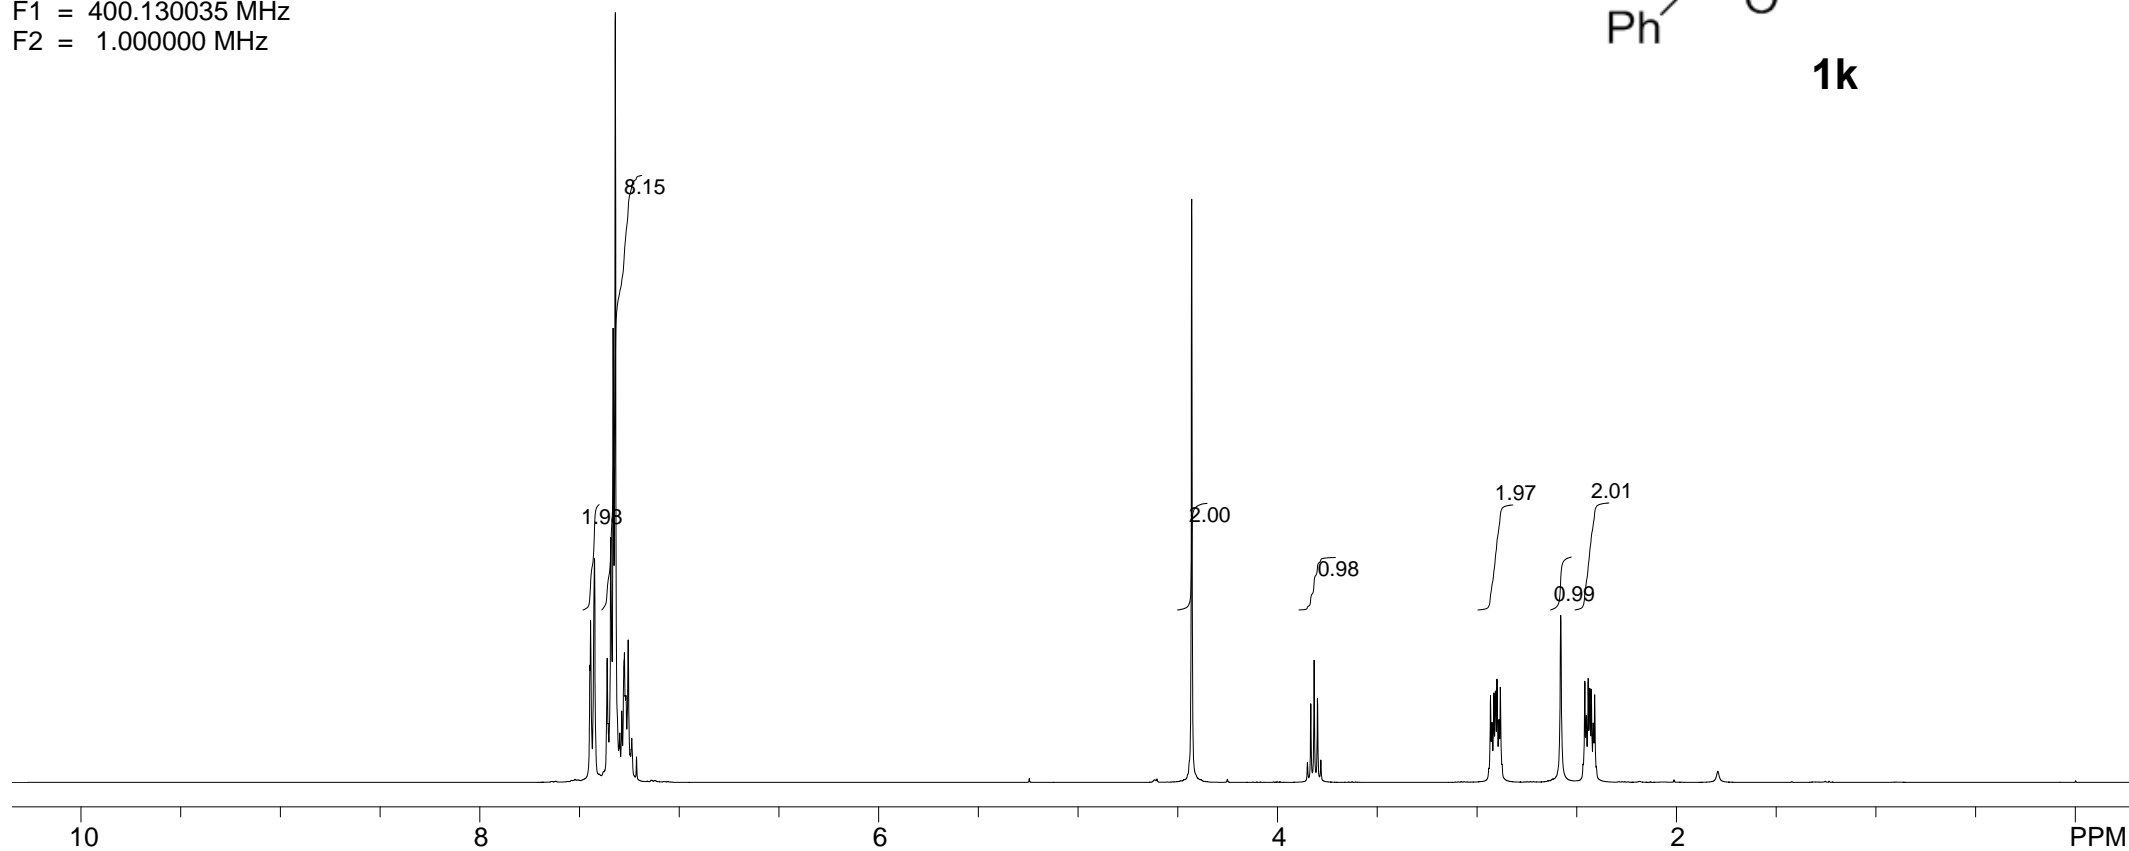

wpl-4-190C  
Pulse length = 10.000 usec  
Recycle delay = 1.000 sec  
NA = 512  
Solvent = CDCl3  
PTS1d = 32768  
F1 = 100.612770 MHz  
F2 = 1.000000 MHz

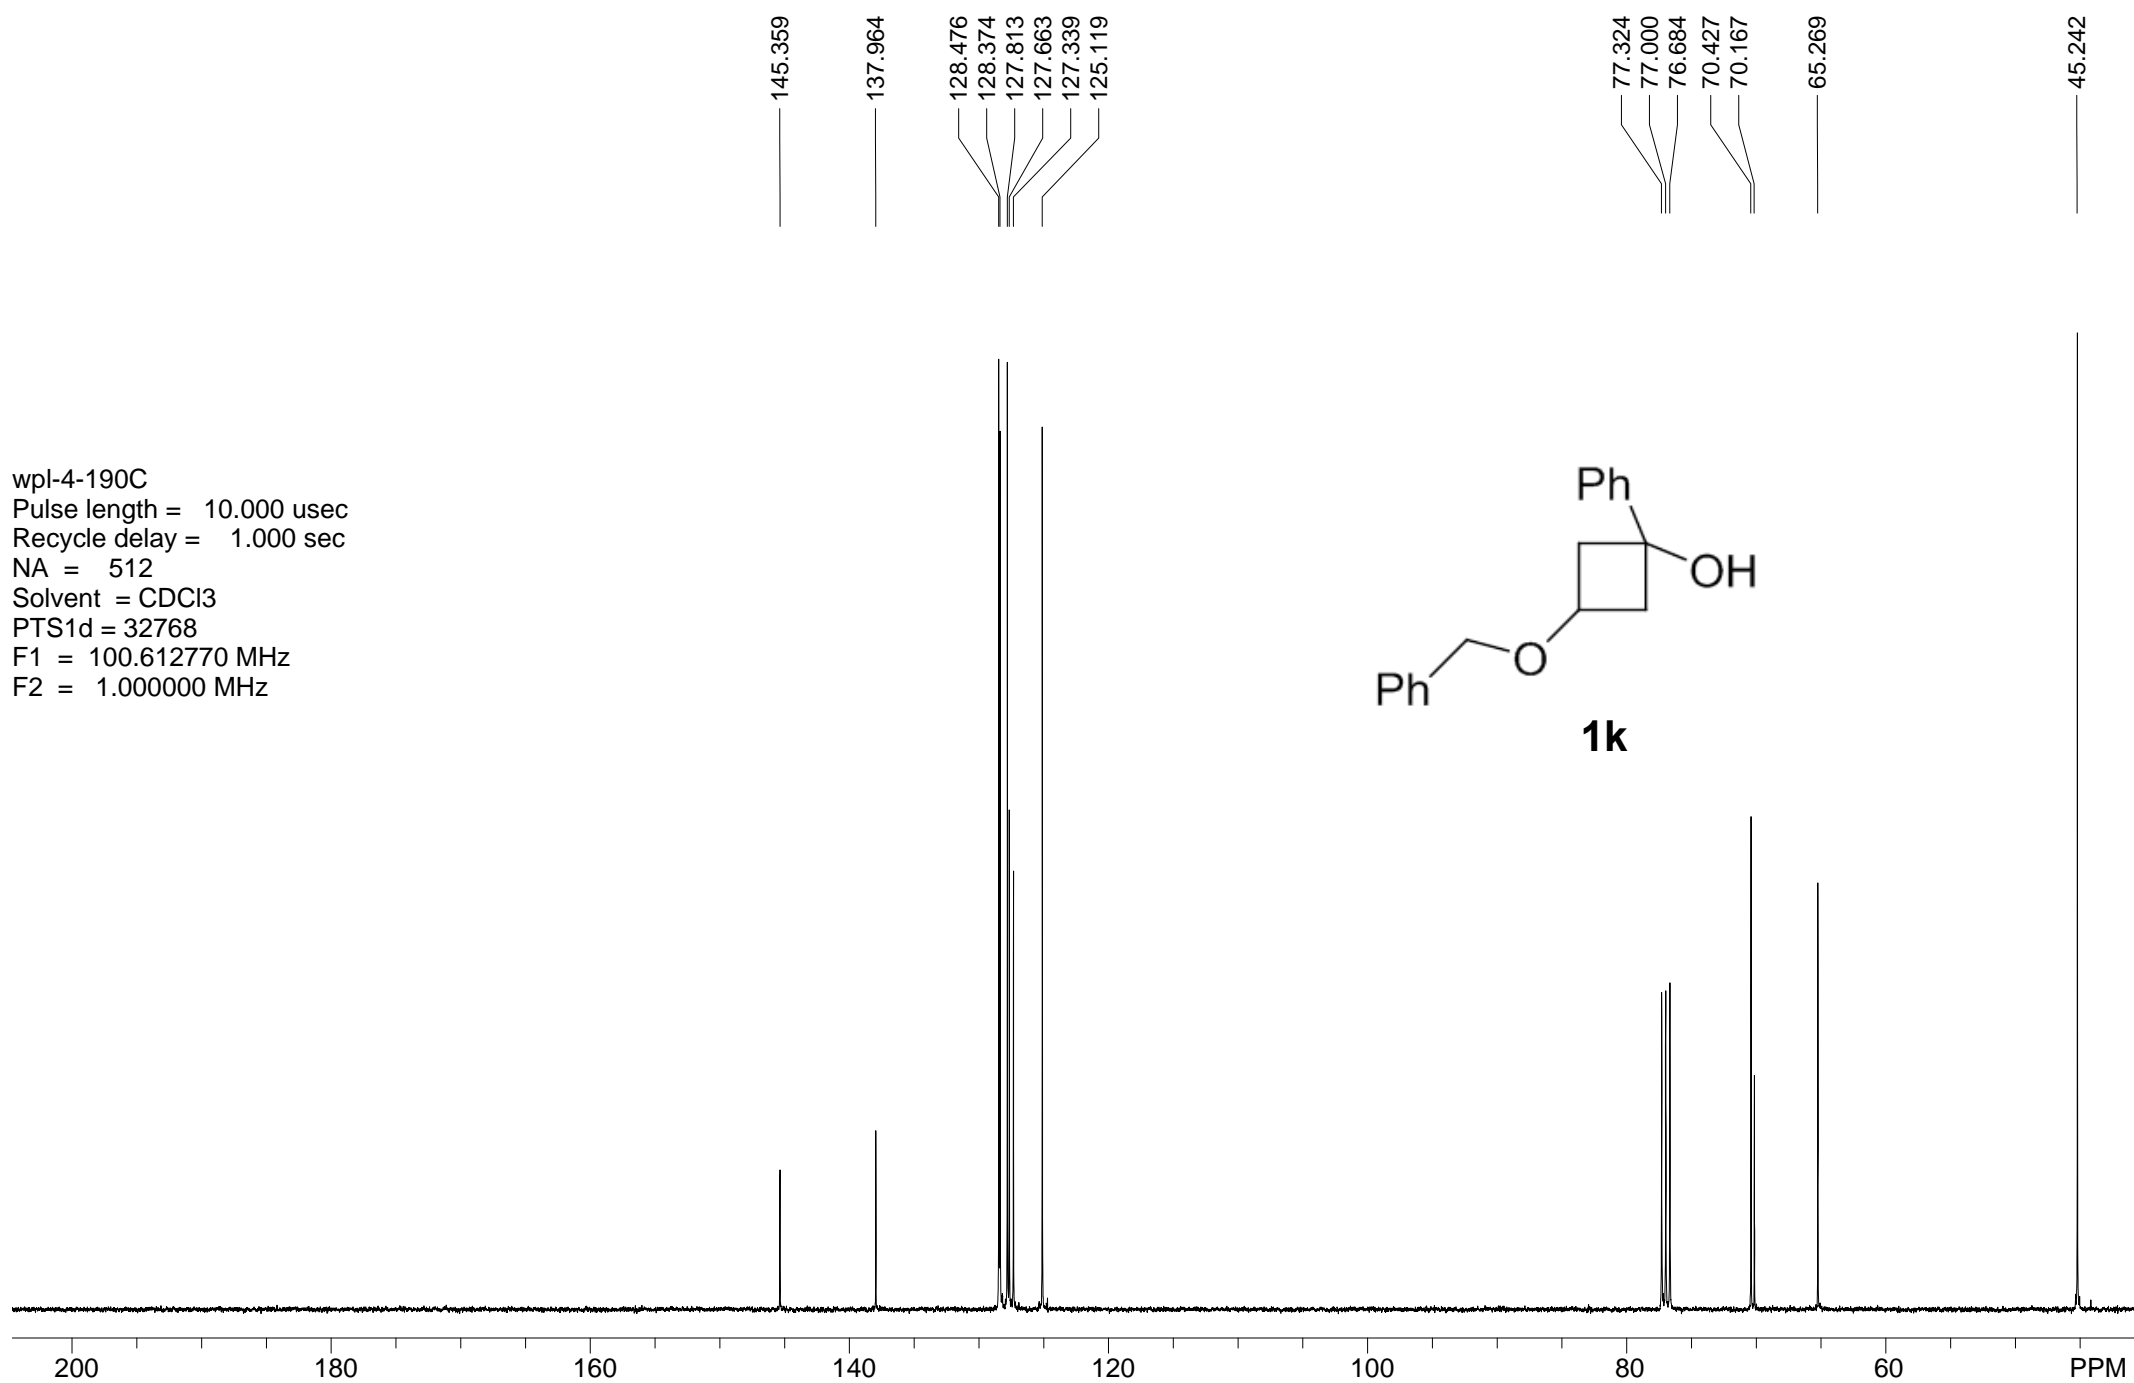



7.956  
7.953  
7.936  
7.933  
7.675  
7.670  
7.654  
7.597  
7.595  
7.578  
7.575  
7.480  
7.476  
7.461  
7.458  
7.438  
7.428  
7.416  
7.411  
7.398  
7.394  
7.378  
7.372  
7.257  
6.580  
3.829  
3.826

1.700  
-0.000

wpl-2-98H  
Nov 21 2017  
Pulse length = 3.400 usec  
Recycle delay = 20.000 sec  
NA = 4  
Solvent = cdcl3  
FID PTS1d = 16384  
PTS1d = 16384  
F1 = 399.749542 MHz  
F2 = 100.526031 MHz

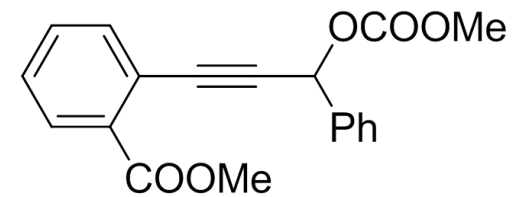

**2d**

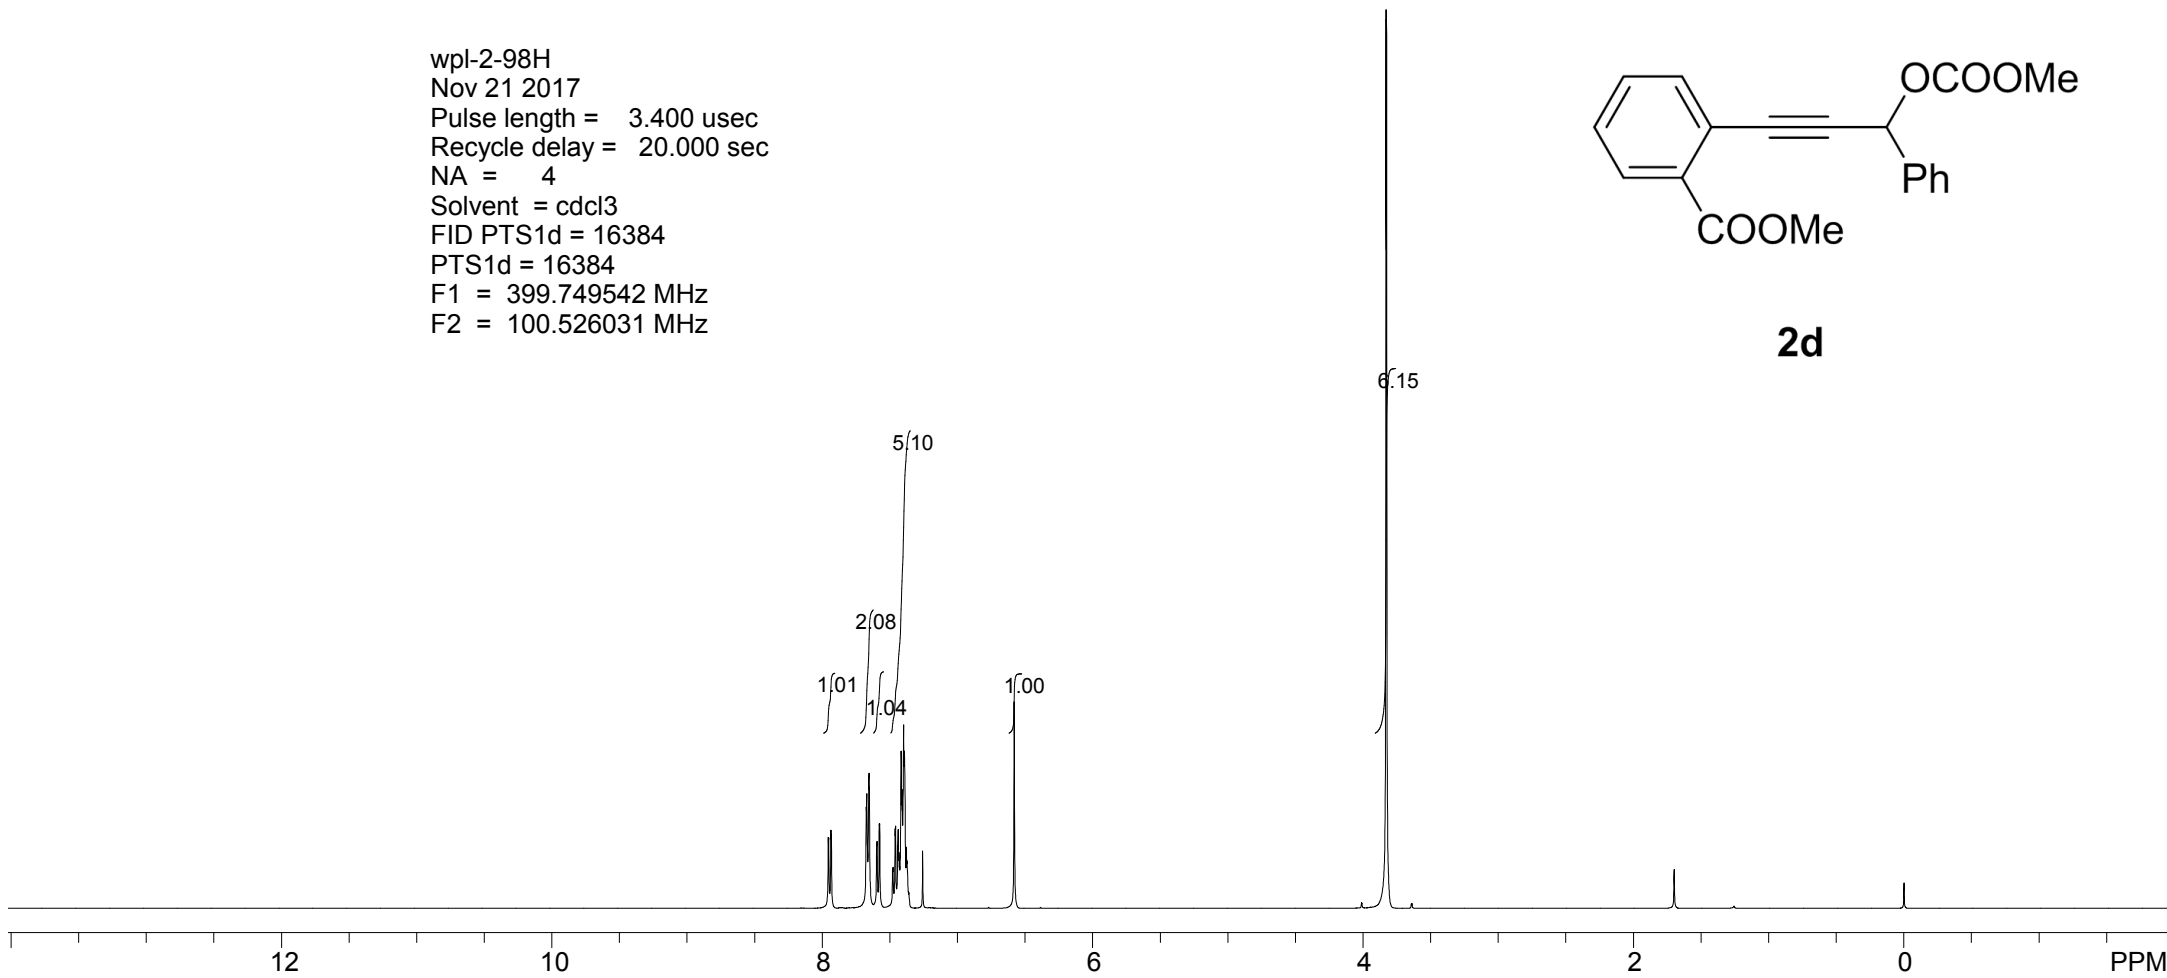

wpl-2-98C  
Nov 21 2017  
Pulse length = 4.000 usec  
Recycle delay = 1.000 sec  
NA = 512  
Solvent = cdcl3  
FID PTS1d = 32768  
PTS1d = 32768  
F1 = 100.527557 MHz  
F2 = 399.749146 MHz

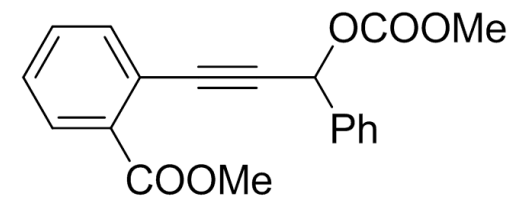

**2d**

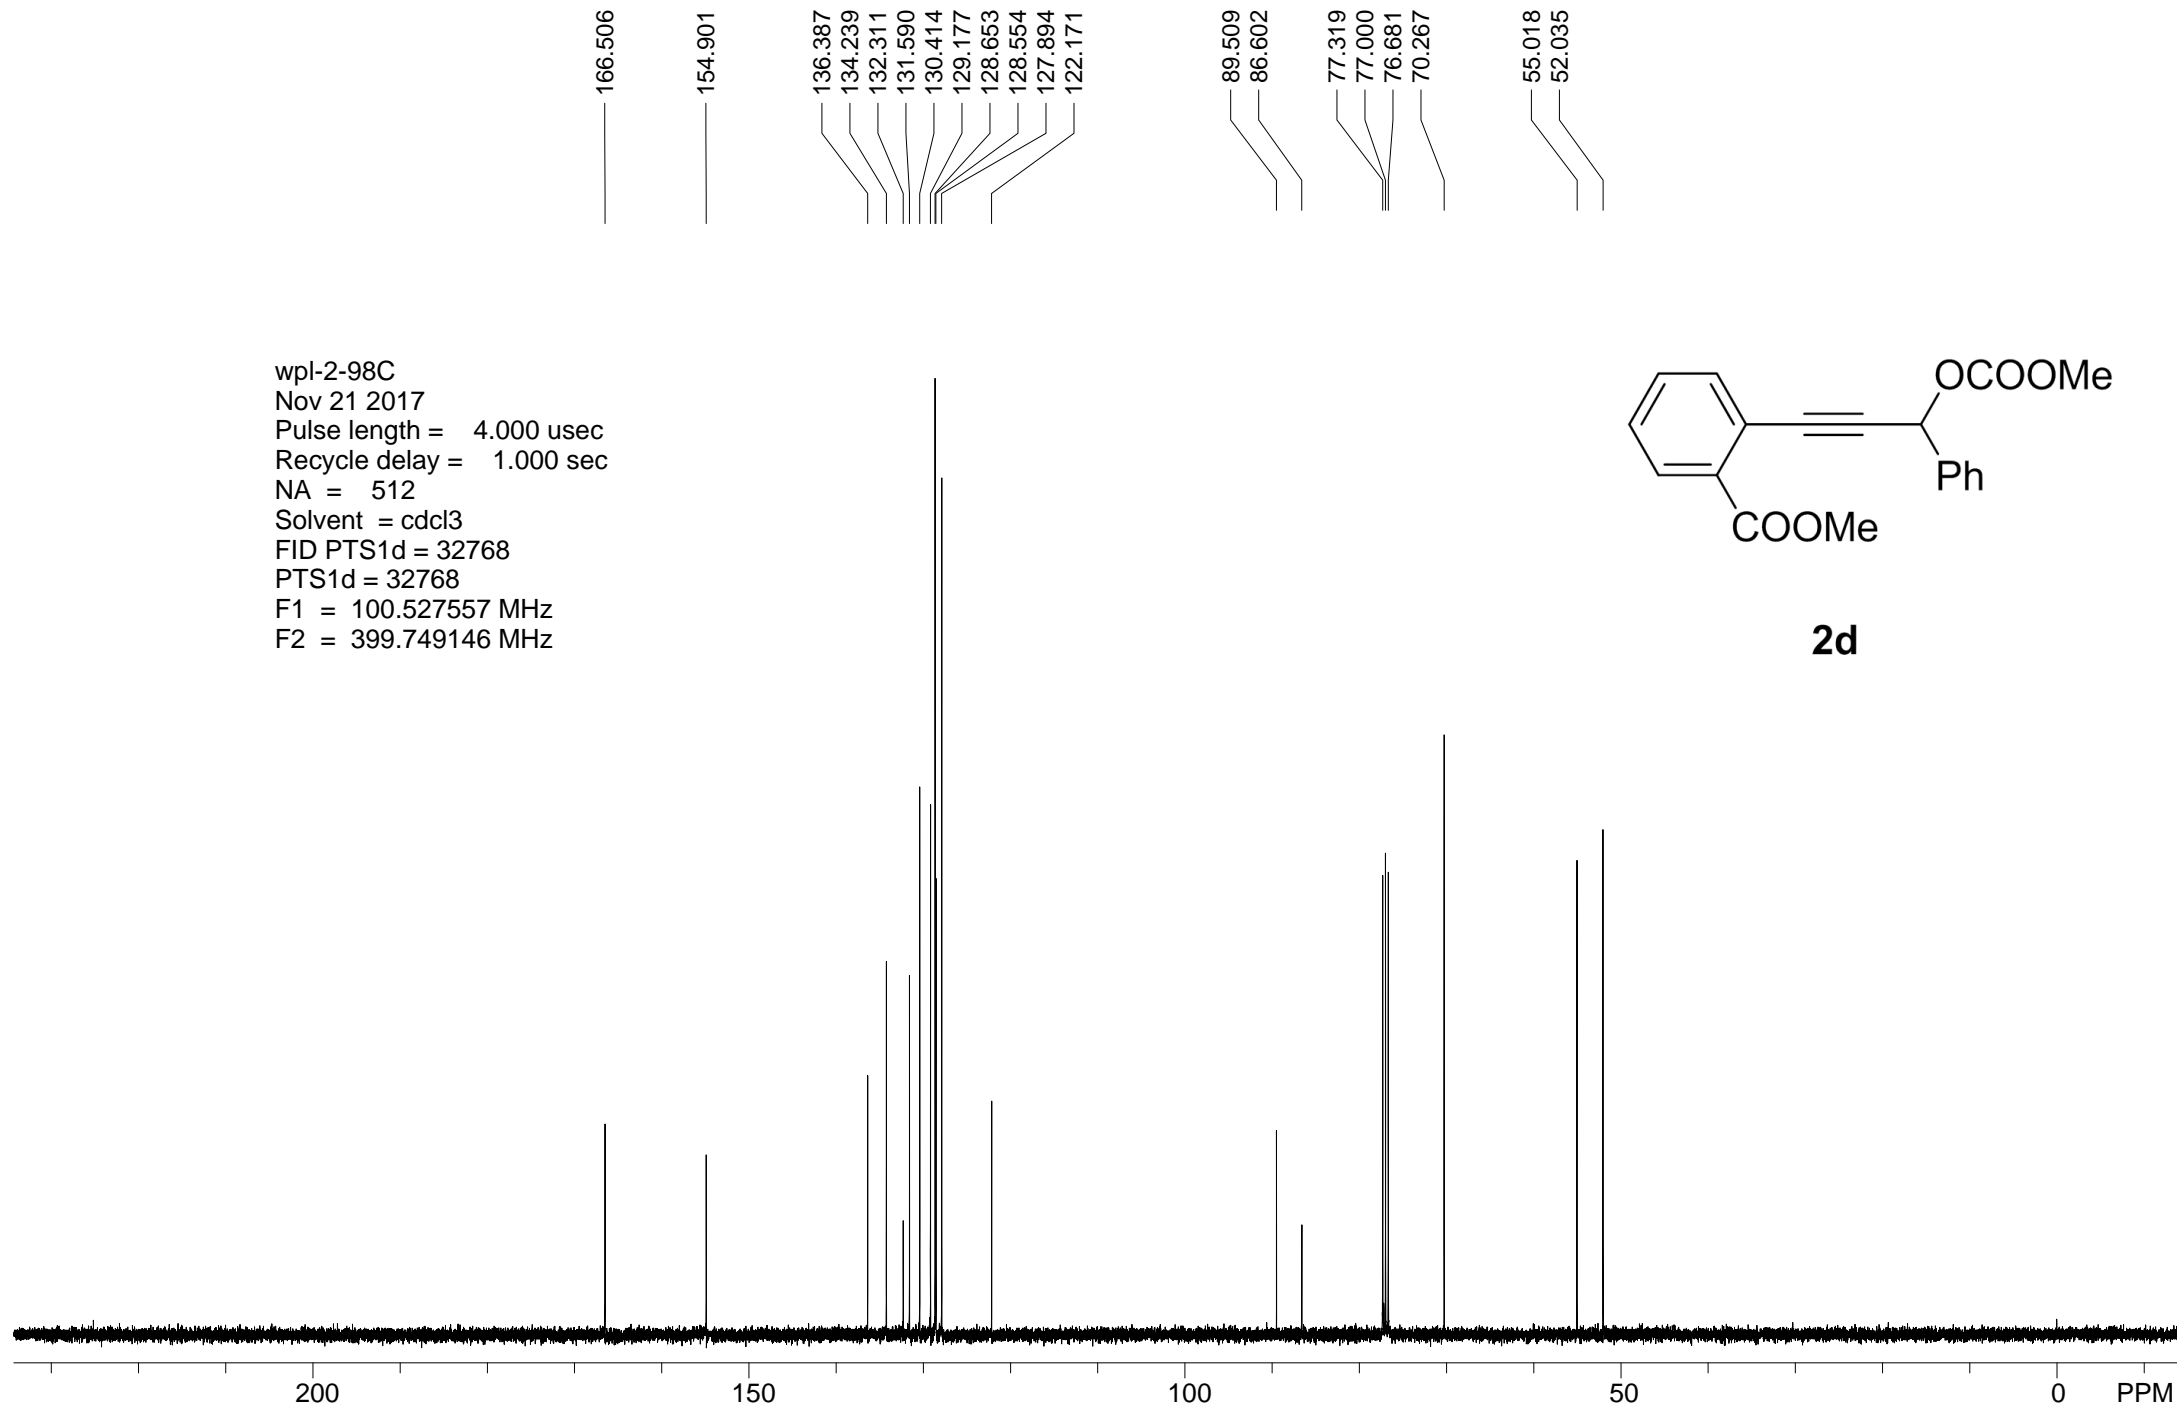

7.710  
7.705  
7.485  
7.482  
7.468  
7.461  
7.457  
7.452  
7.435  
7.431  
7.376  
7.372  
7.358  
7.338  
7.320  
7.308  
7.304  
7.298  
7.252  
6.467  
3.834

1.595

-0.000

wpl-2-92H  
Nov 16 2017  
Pulse length = 3.400 usec  
Recycle delay = 20.000 sec  
NA = 4  
Solvent = cdcl3  
FID PTS1d = 16384  
PTS1d = 16384  
F1 = 399.749542 MHz  
F2 = 100.526031 MHz

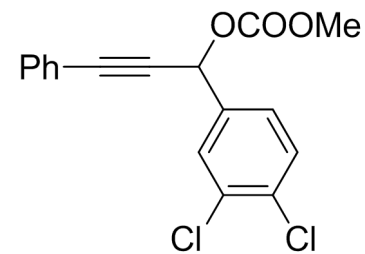

**2g**

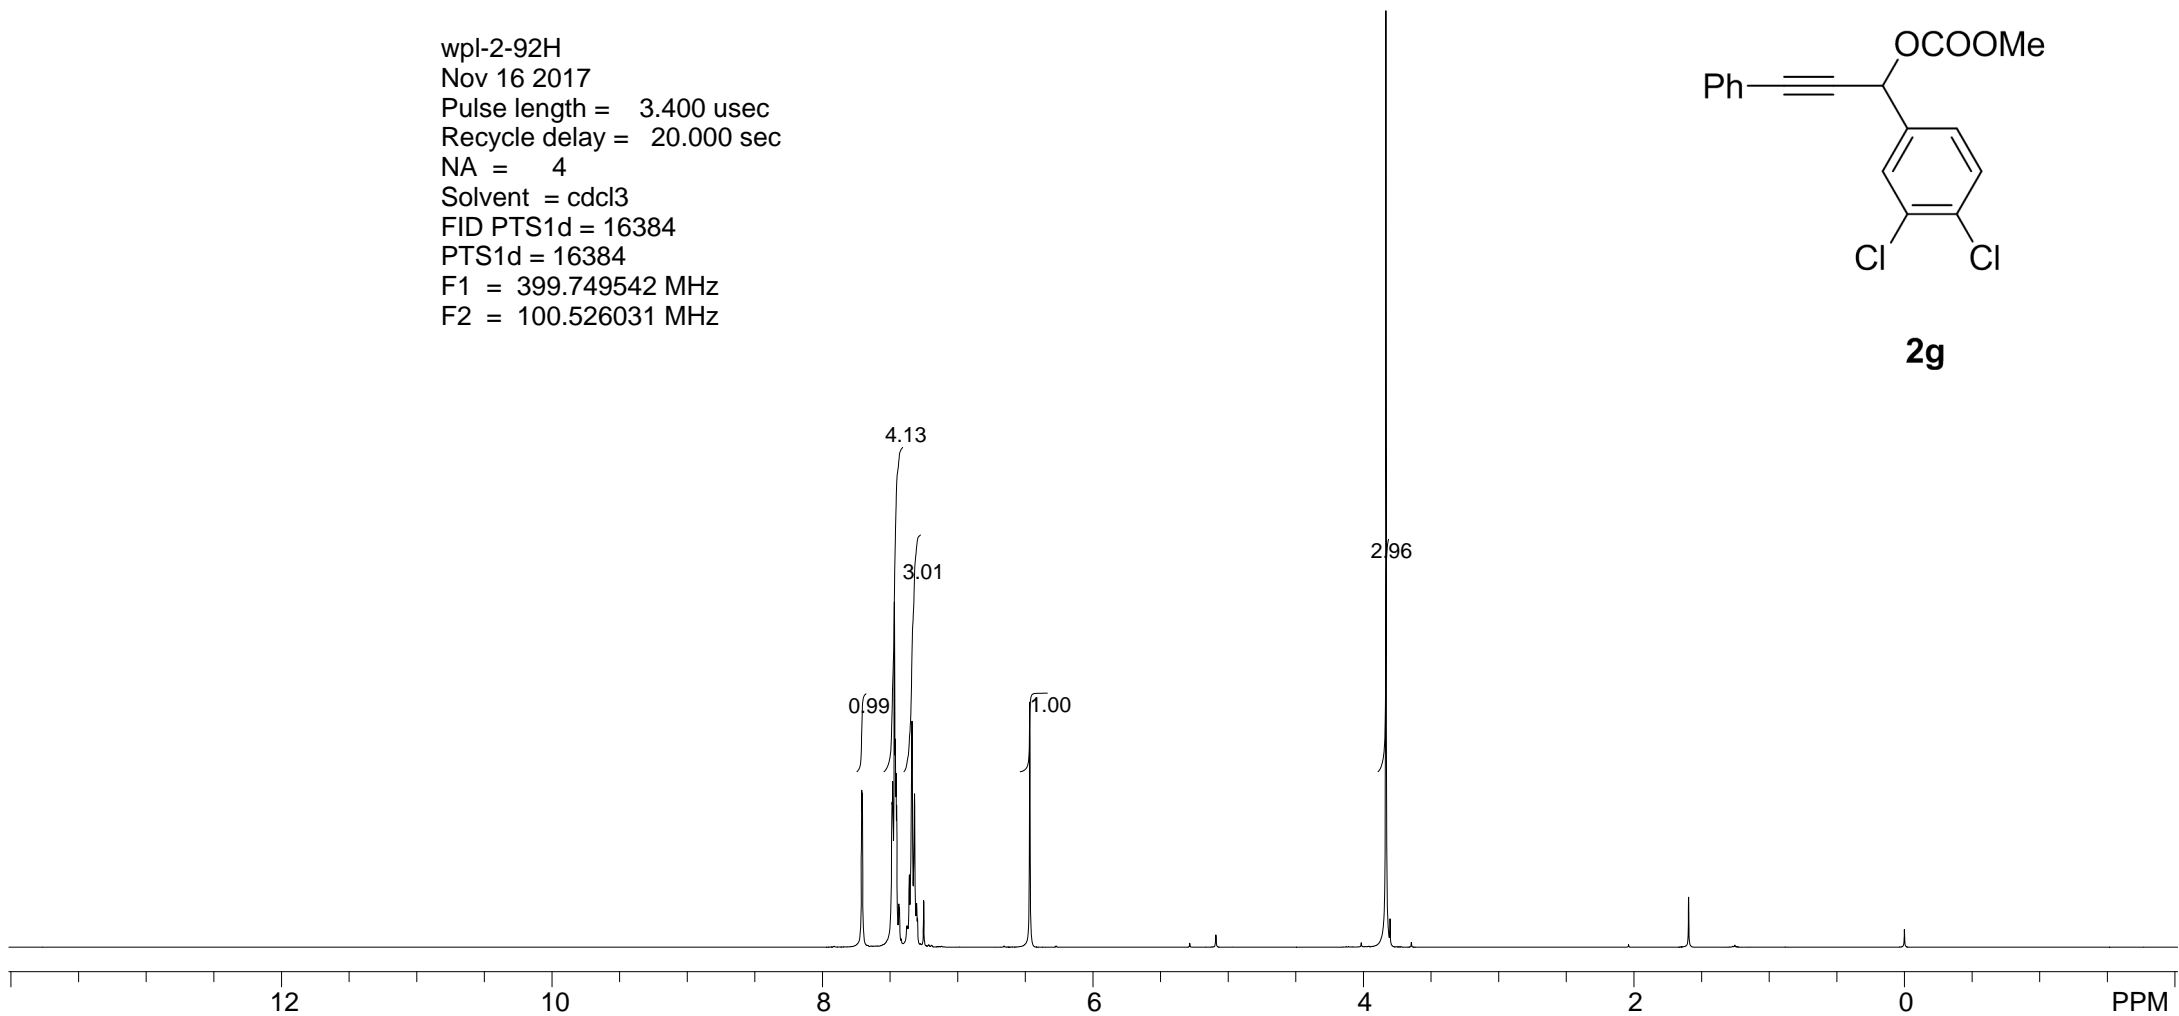

wpl-2-92C  
Nov 16 2017  
Pulse length = 4.000 usec  
Recycle delay = 1.000 sec  
NA = 512  
Solvent = cdcl3  
FID PTS1d = 32768  
PTS1d = 32768  
F1 = 100.527557 MHz  
F2 = 399.749146 MHz

154.658  
133.427  
136.653  
132.873  
131.894  
130.695  
129.715  
129.169  
128.326  
126.983  
121.427  
88.689  
83.733  
77.319  
77.000  
76.681  
68.711  
55.261

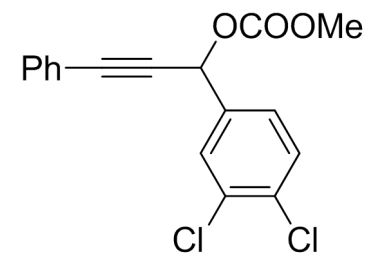

**2g**

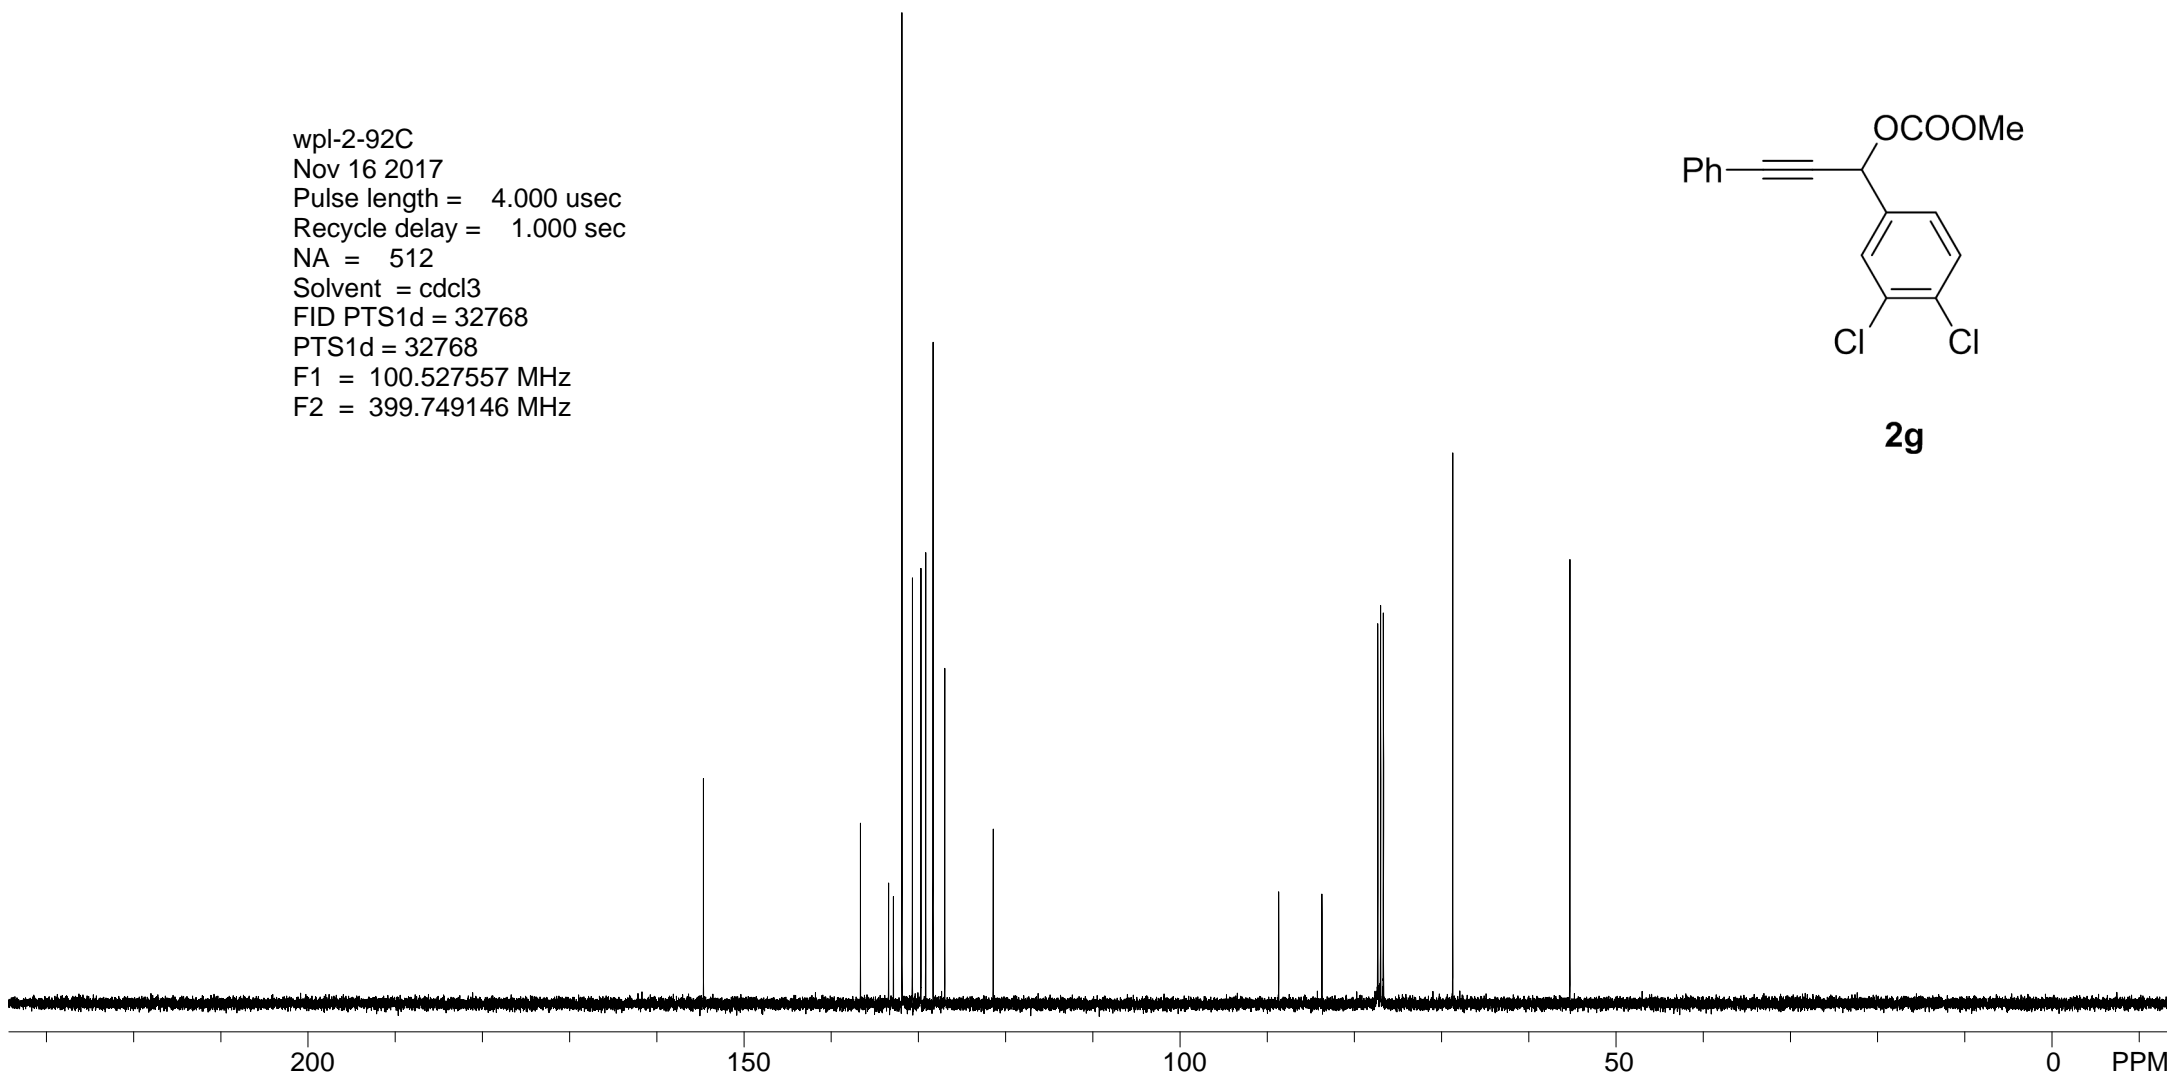

wpl-4-180H  
Pulse length = 10.000 usec  
Recycle delay = 1.000 sec  
NA = 4  
Solvent = CDCl3  
PTS1d = 65536  
F1 = 400.130005 MHz  
F2 = 1.000000 MHz

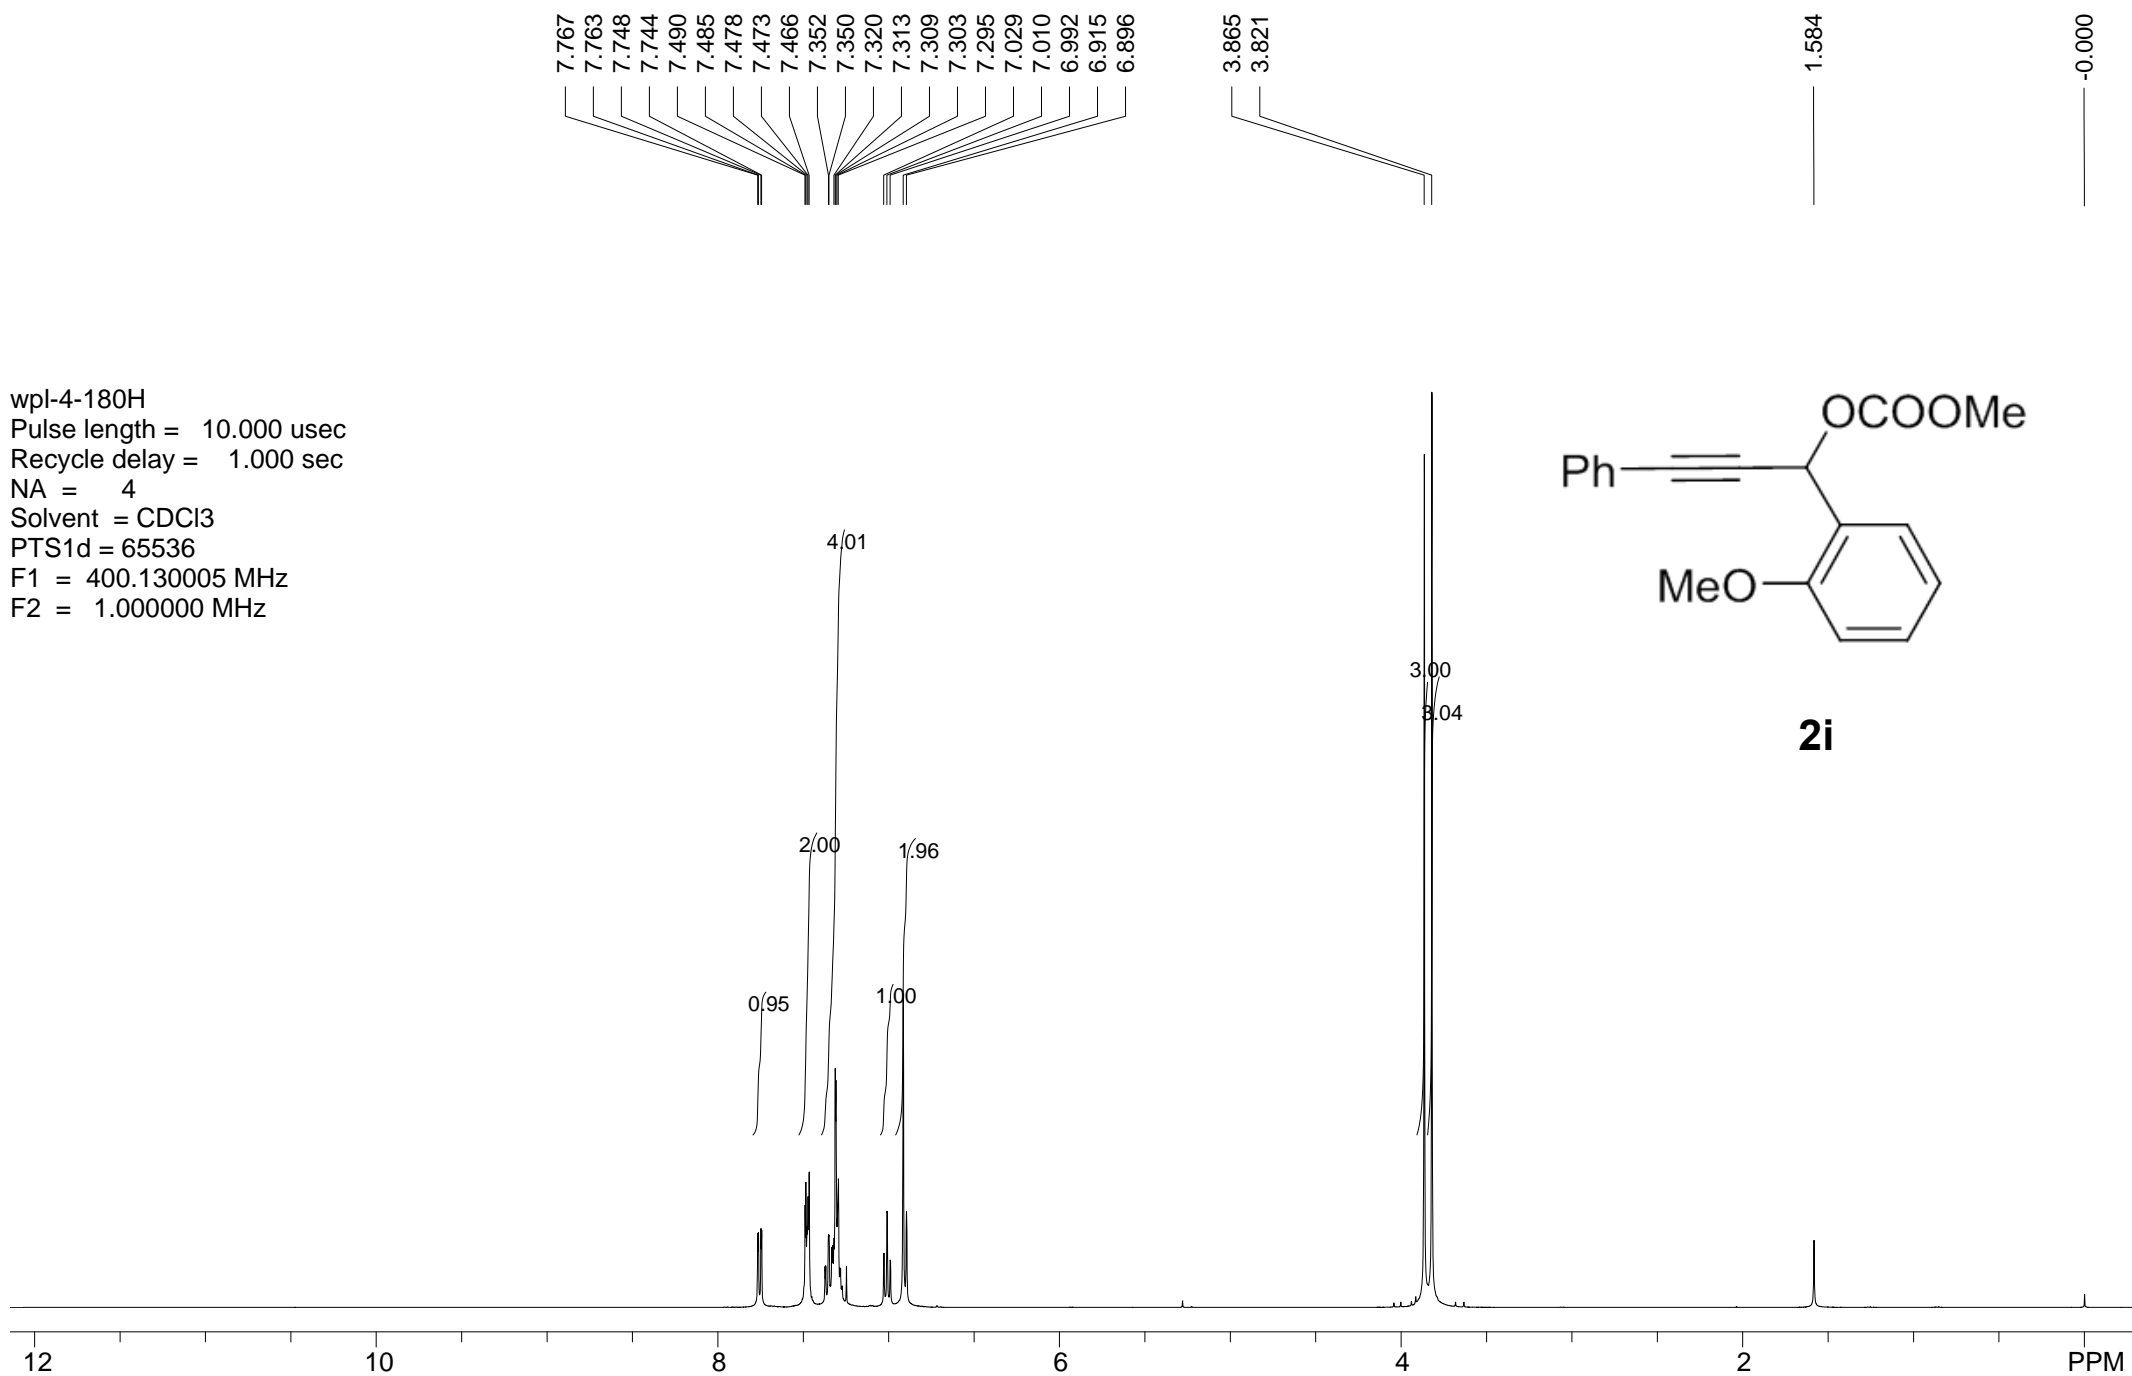

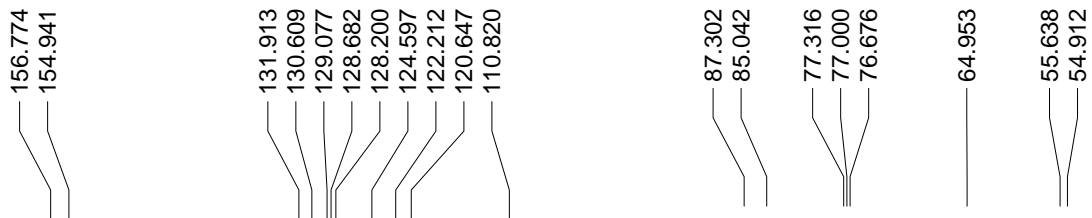

wpl-4-180C  
Pulse length = 10.000 usec  
Recycle delay = 1.000 sec  
NA = 128  
Solvent = CDCl3  
PTS1d = 32768  
F1 = 100.612770 MHz  
F2 = 1.000000 MHz

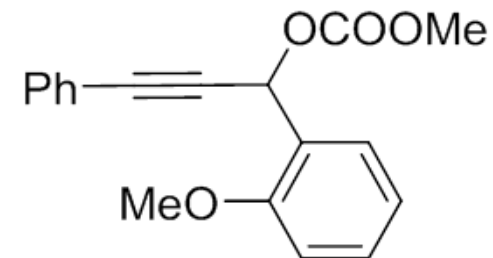

**2i**

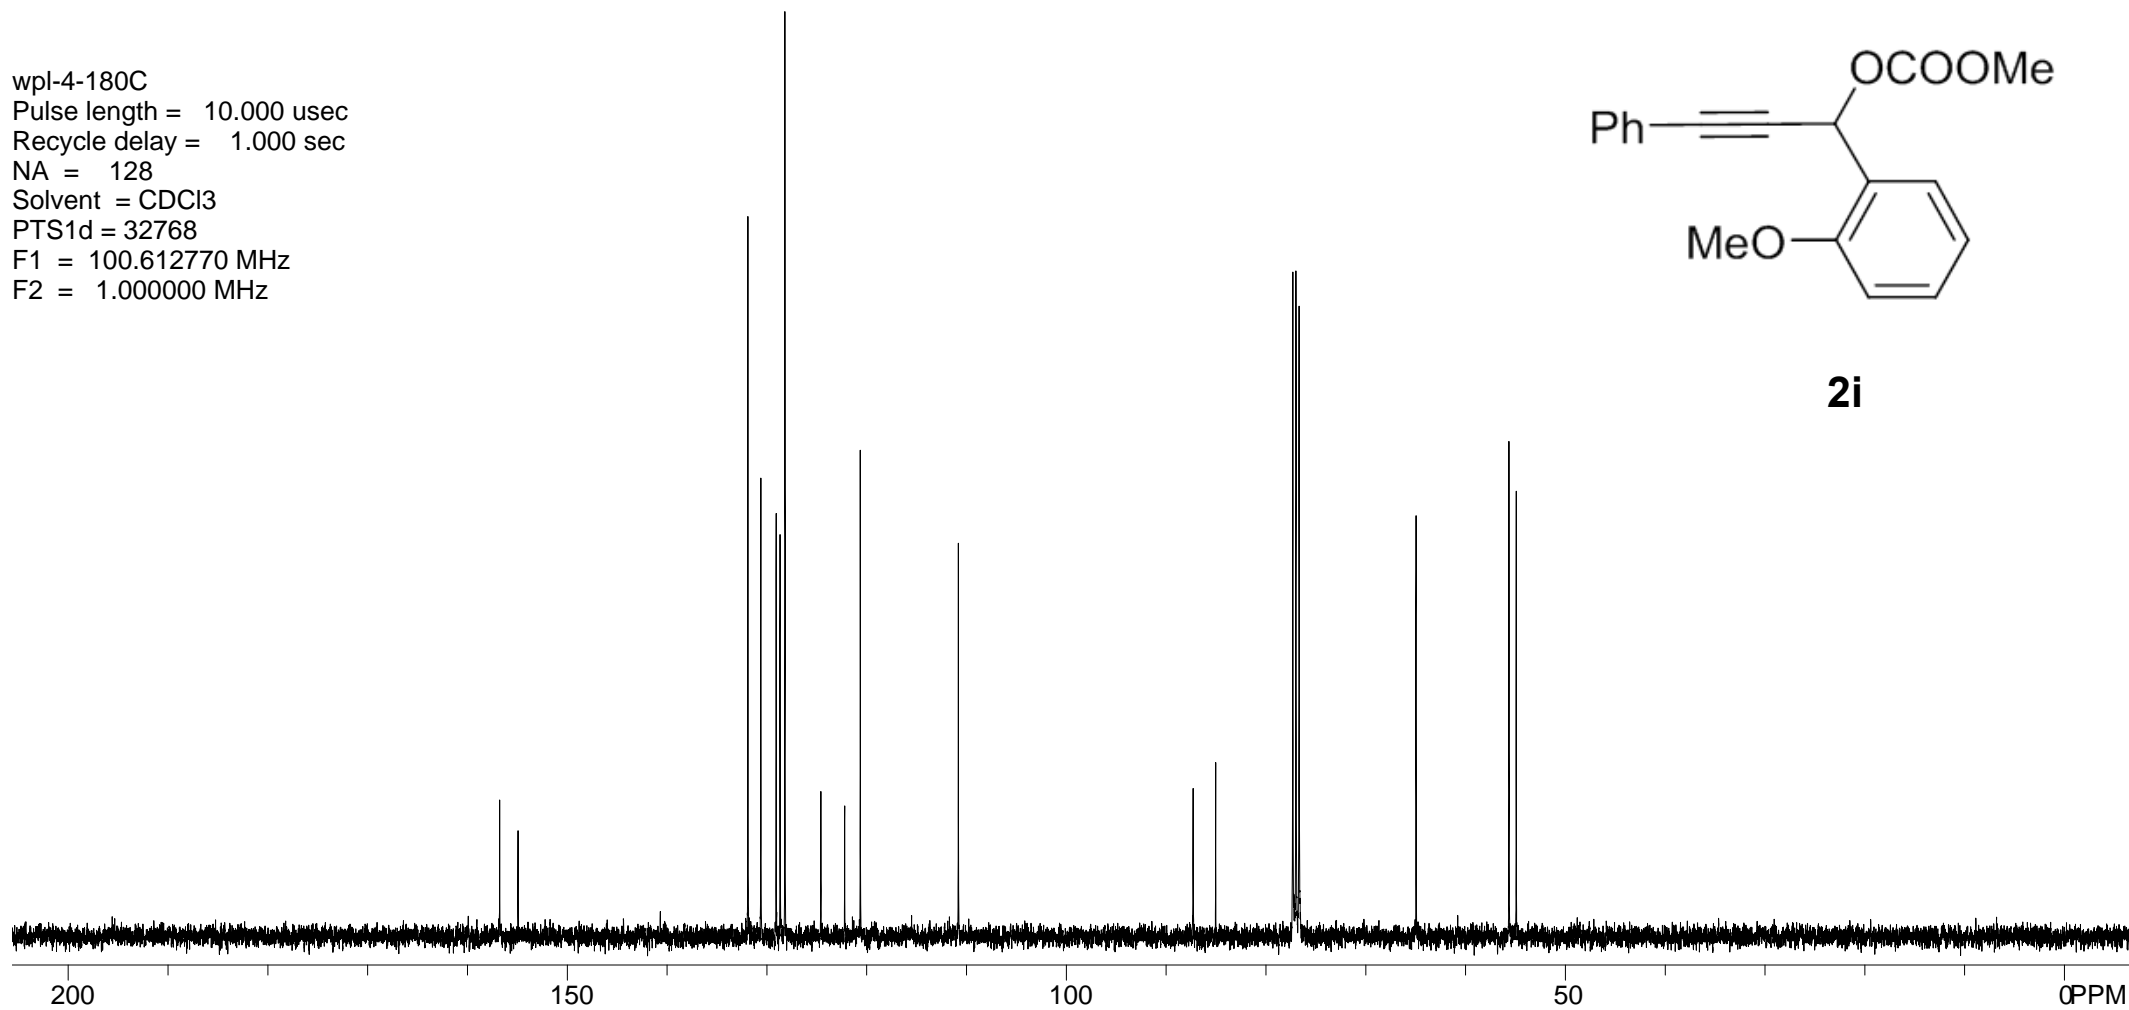

7.456  
7.451  
7.441  
7.433  
7.431  
7.304  
7.298  
7.290  
7.259

2.072  
2.058  
3.766  
2.044  
2.039  
2.028  
2.009  
1.998  
1.923  
1.910  
1.894  
1.881  
1.863  
1.848  
1.785  
1.659  
1.640  
1.620  
1.614  
1.599  
1.584  
1.575  
1.555  
1.002  
0.984  
0.966  
0.000

wpl-2-124H  
Jan 2 2018  
Pulse length = 3.400 usec  
Recycle delay = 20.000 sec  
NA = 4  
Solvent = cdcl3  
FID PTS1d = 16384  
PTS1d = 16384  
F1 = 399.749542 MHz  
F2 = 100.526031 MHz

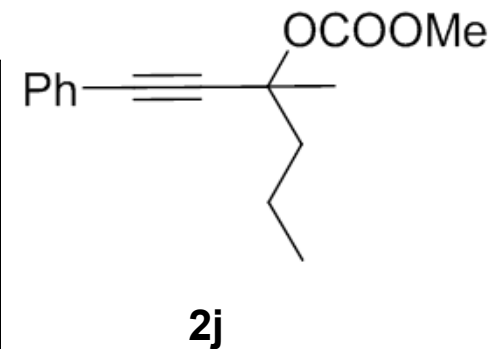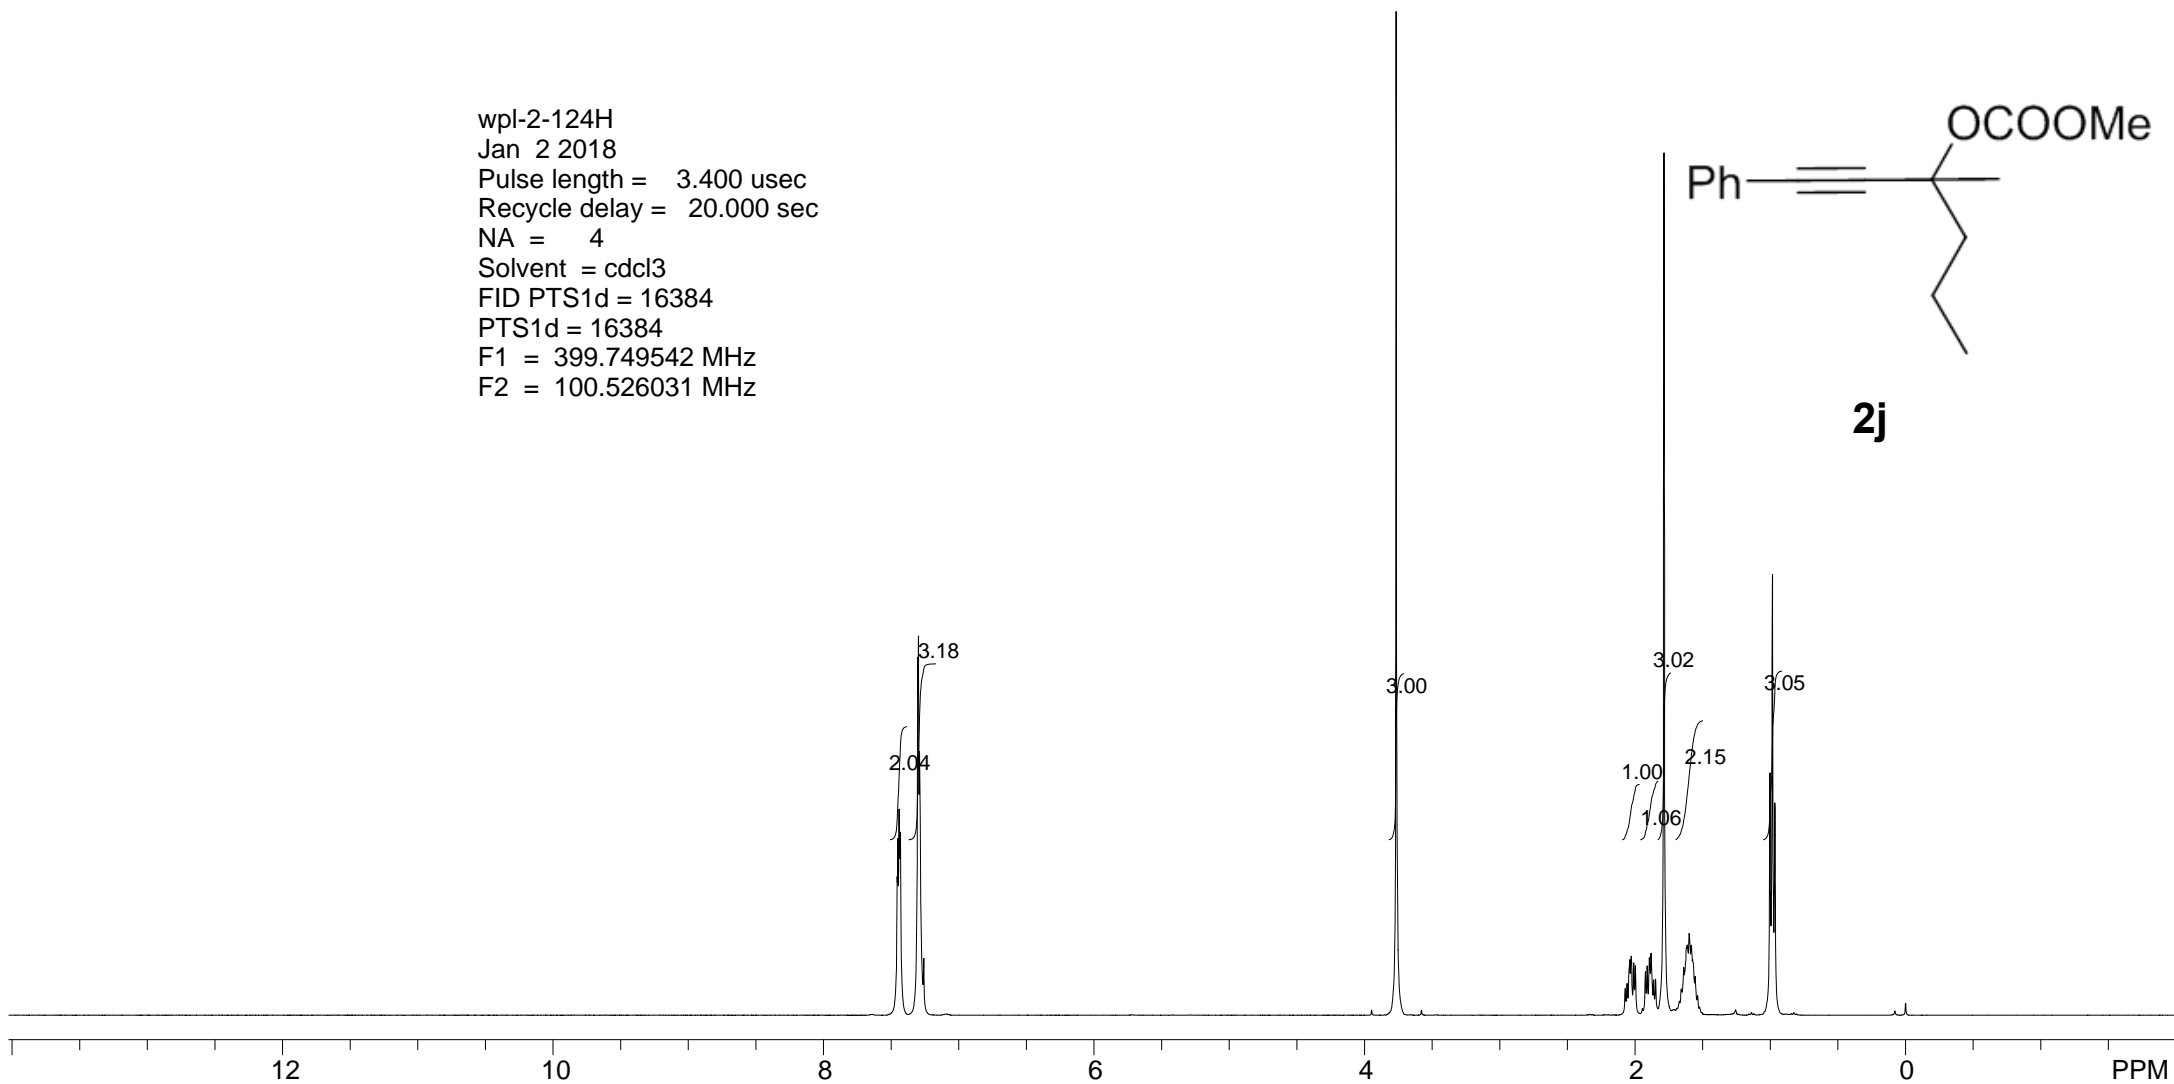

wpl-2-124C  
Jan 2 2018  
Pulse length = 4.000 usec  
Recycle delay = 1.000 sec  
NA = 512  
Solvent = cdcl3  
FID PTS1d = 32768  
PTS1d = 32768  
F1 = 100.527557 MHz  
F2 = 399.749146 MHz

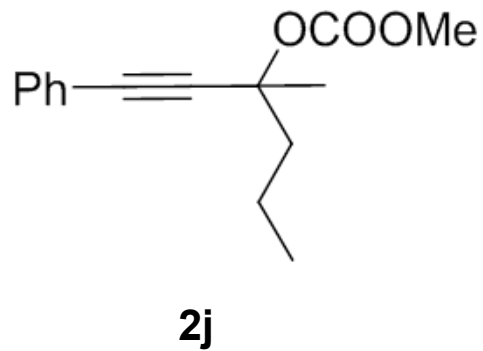

153.458

131.810

128.402

128.137

122.421

88.621

85.425

77.880

77.326

77.000

76.689

54.236

43.655

26.395

17.628

13.999

200

150

100

50

0

PPM



7.869  
7.850  
7.847  
7.532  
7.513  
7.492  
7.480  
7.461  
7.409  
7.389  
7.369  
7.353  
7.334  
7.316  
7.312  
7.292  
7.273  
7.236  
7.230  
7.222  
7.218  
7.203  
7.189  
7.185  
6.567  
6.560  
6.552  
3.082  
3.064  
3.046  
2.720  
2.712  
2.702  
2.695  
2.684  
2.676  
2.666  
2.658  
2.131  
2.113  
2.095  
2.092  
2.073  
2.055  
2.037  
1.600  
0.000

wpl-2-79H  
Nov 7 2017  
Pulse length = 3.400 usec  
Recycle delay = 20.000 sec  
NA = 4  
Solvent = cdcl3  
FID PTS1d = 16384  
PTS1d = 16384  
F1 = 399.749542 MHz  
F2 = 100.526031 MHz

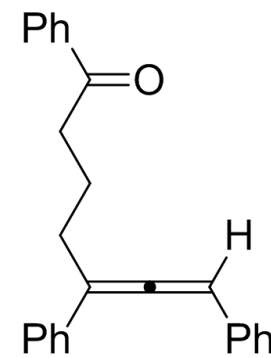

**3aa**

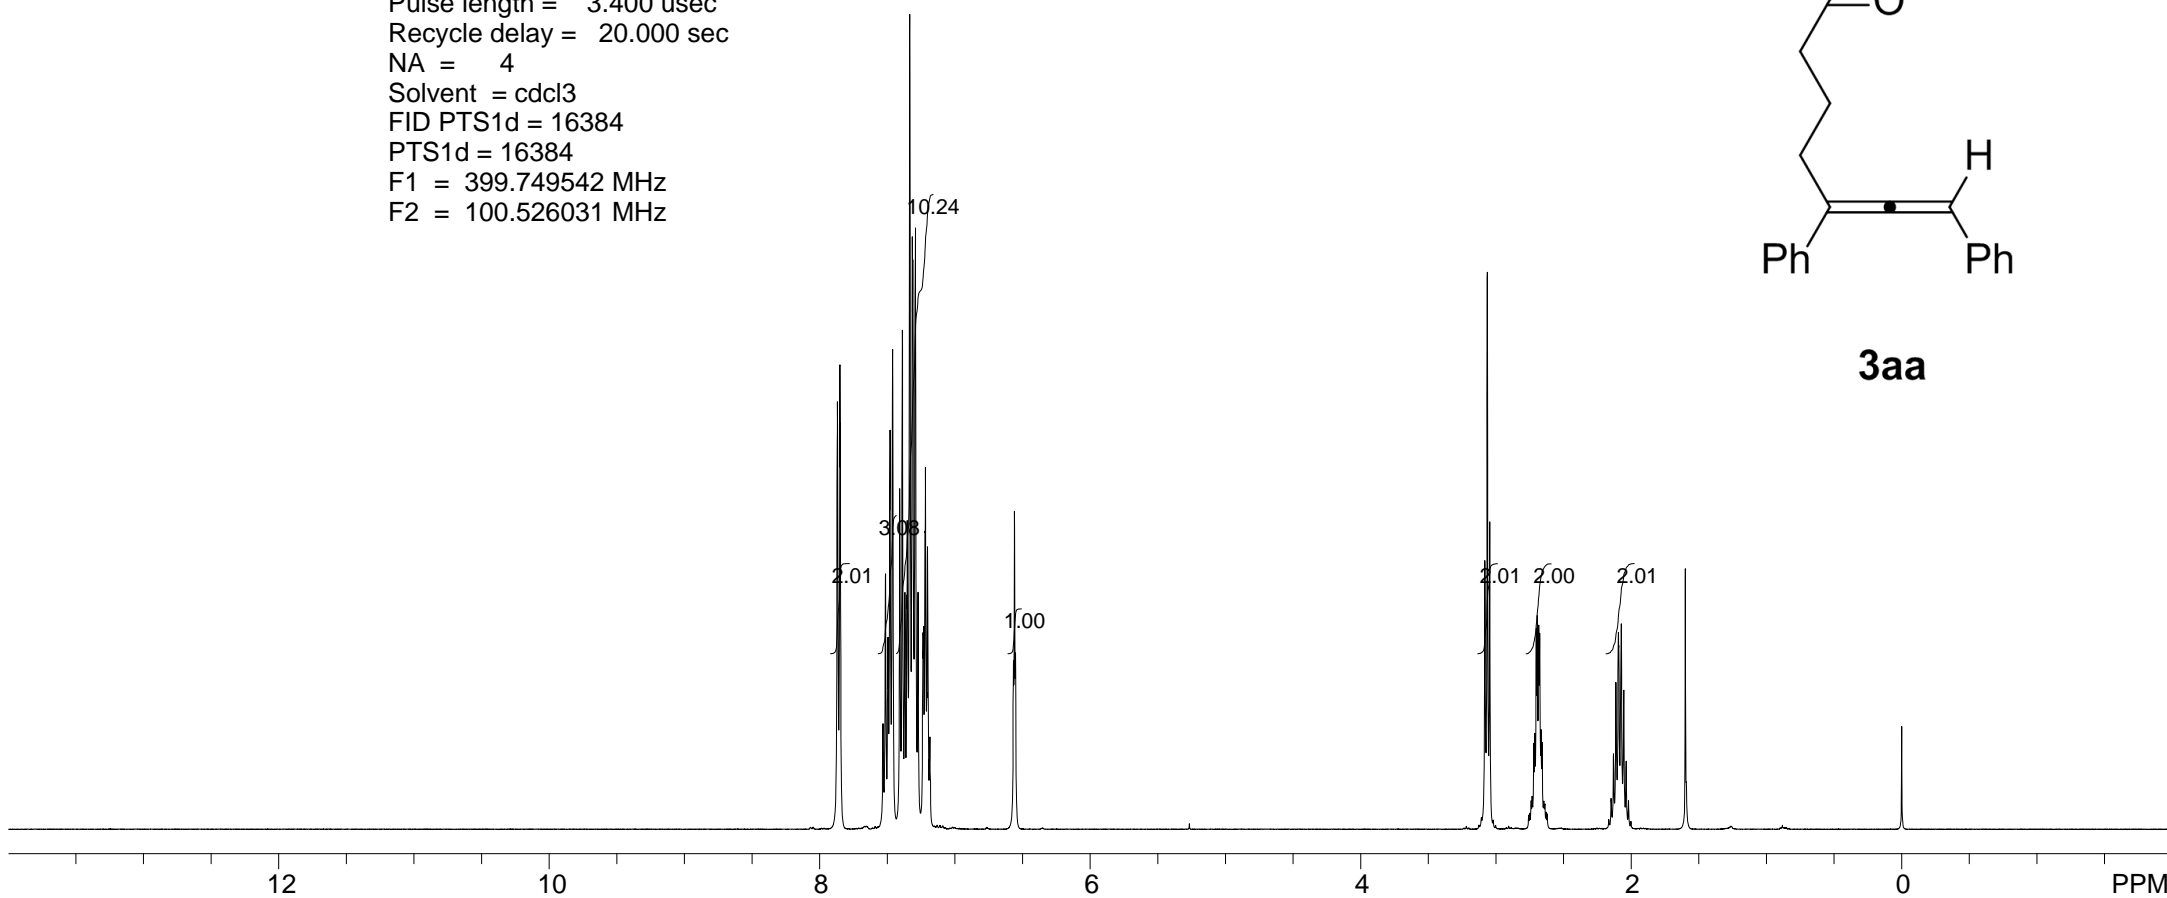

wpl-2-79C  
Nov 7 2017  
Pulse length = 4.000 usec  
Recycle delay = 1.000 sec  
NA = 1000  
Solvent = cdcl3  
FID PTS1d = 32768  
PTS1d = 32768  
F1 = 100.527557 MHz  
F2 = 399.749146 MHz

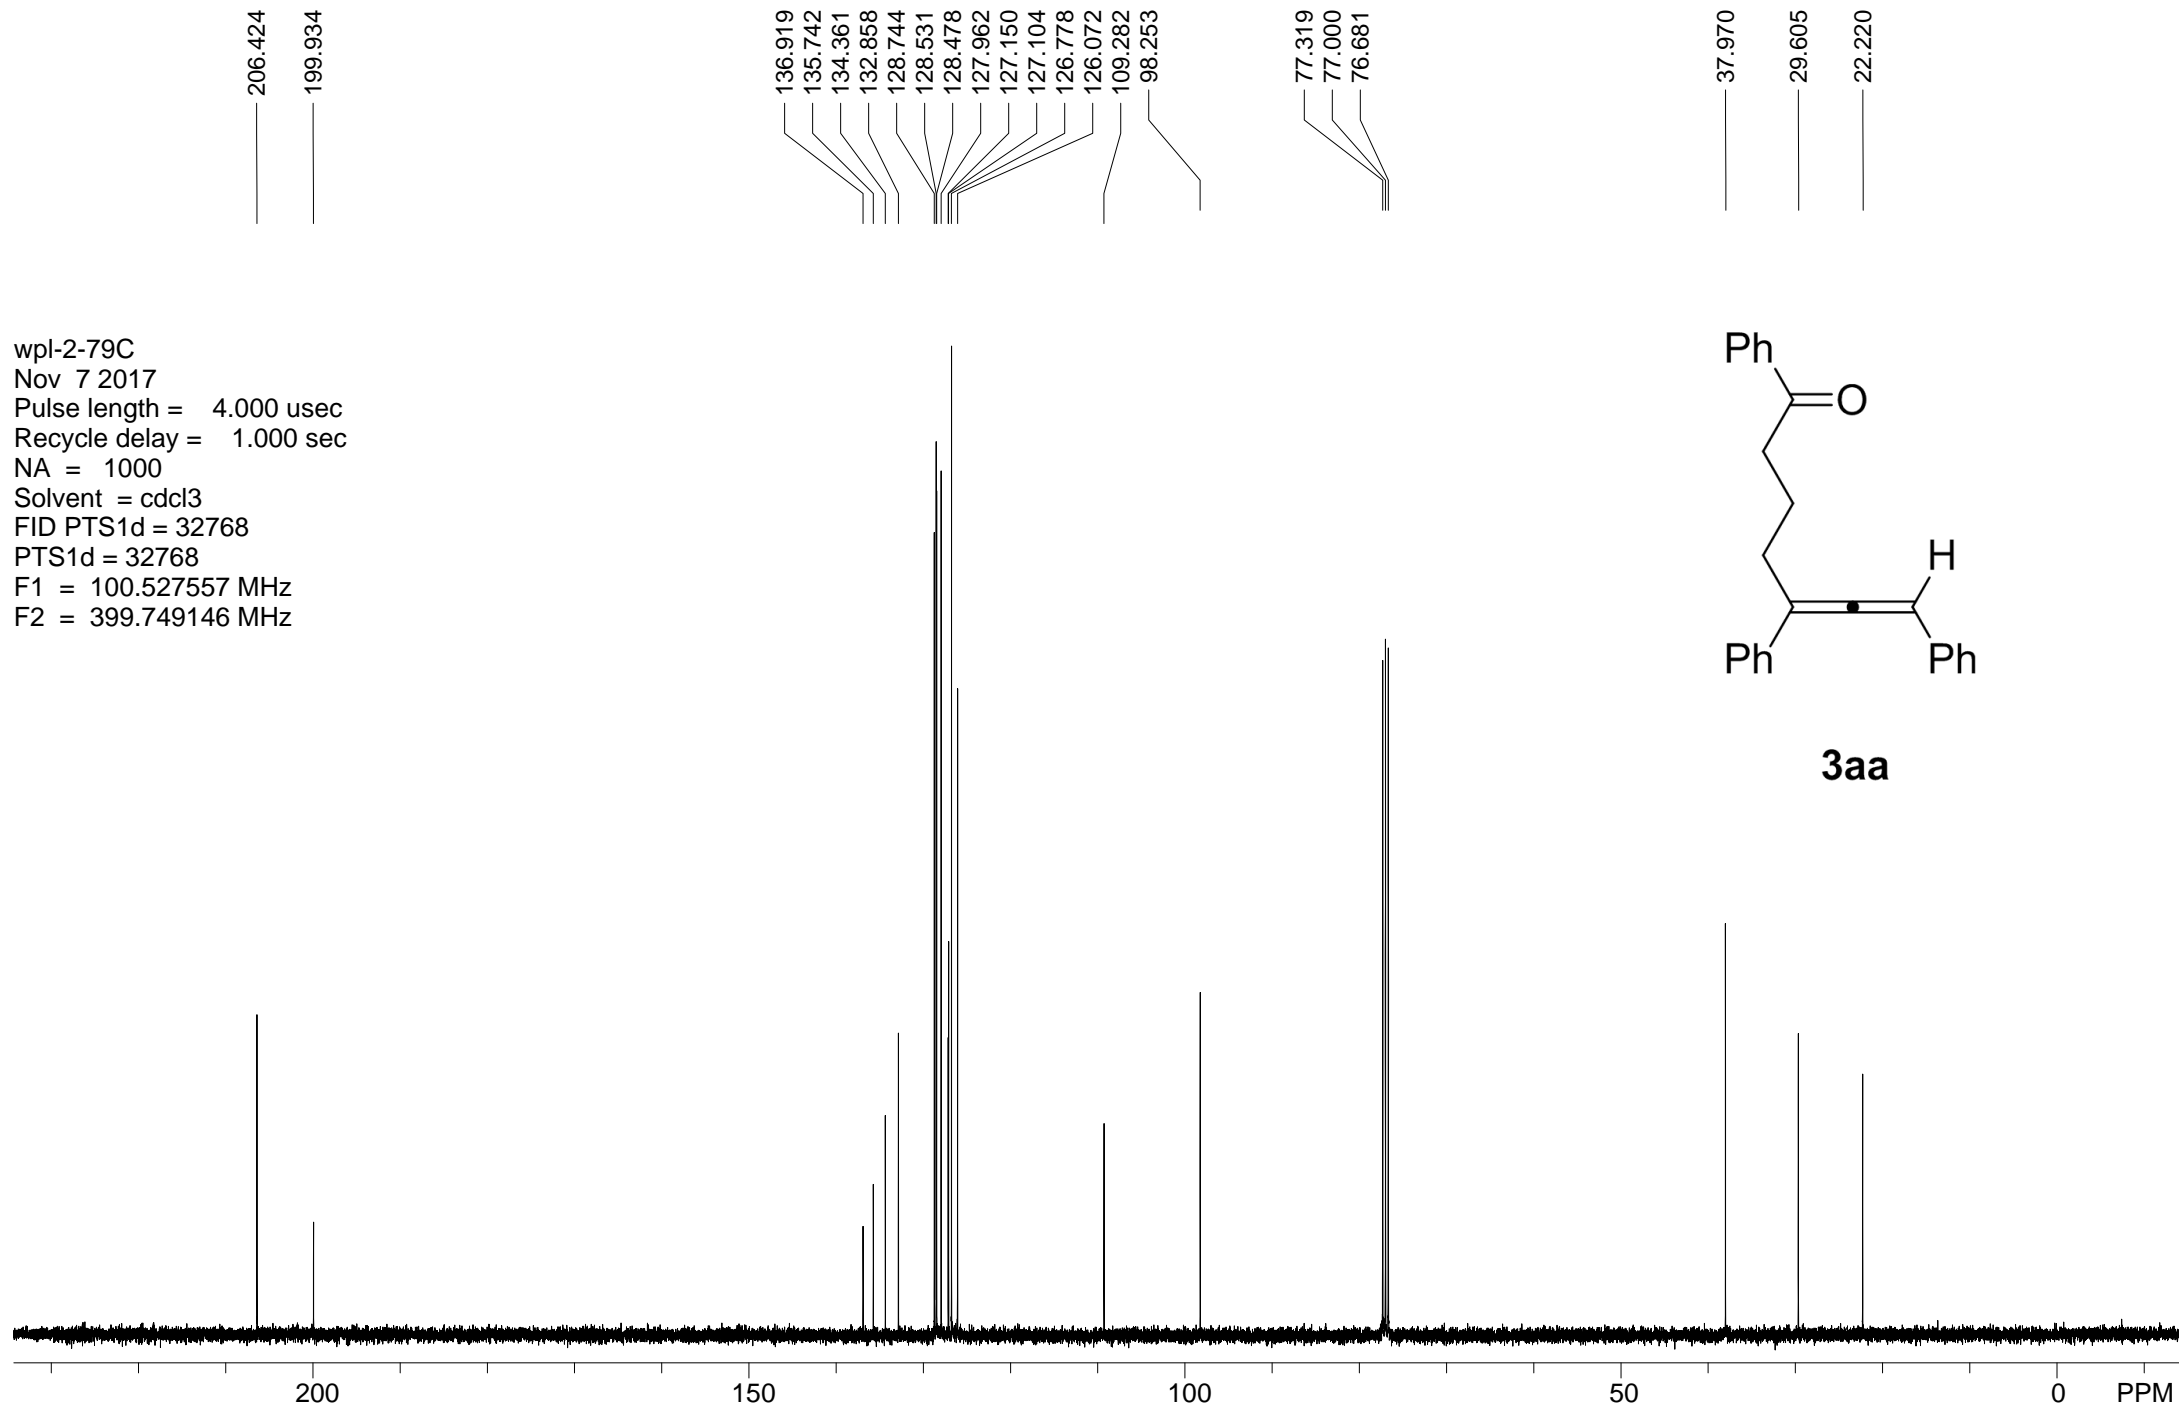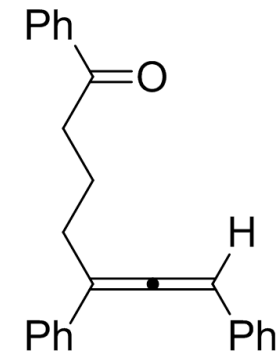

3aa

7.872  
7.858  
7.850  
7.836  
7.478  
7.459  
7.349  
7.332  
7.319  
7.319  
7.294  
7.274  
7.233  
7.228  
7.223  
7.210  
7.060  
7.039  
7.017  
6.571  
6.563  
6.556

3.043  
3.035  
3.025  
3.018  
3.007  
2.999  
2.715  
2.707  
2.698  
2.690  
2.682  
2.674  
2.665  
2.657  
2.122  
2.105  
2.087  
2.080  
2.069  
2.061  
2.044  
2.026  
1.598  
0.000

wpl-2-73H  
Oct 27 2017  
Pulse length = 3.400 usec  
Recycle delay = 1.000 sec  
NA = 8  
Solvent = cdcl3  
FID PTS1d = 16384  
PTS1d = 16384  
F1 = 399.749542 MHz  
F2 = 100.526031 MHz

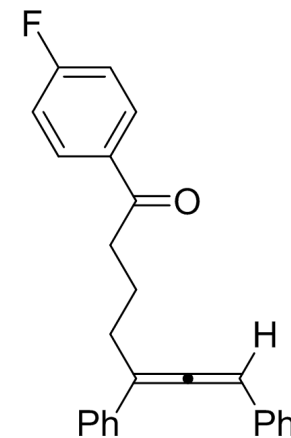

**3ba**

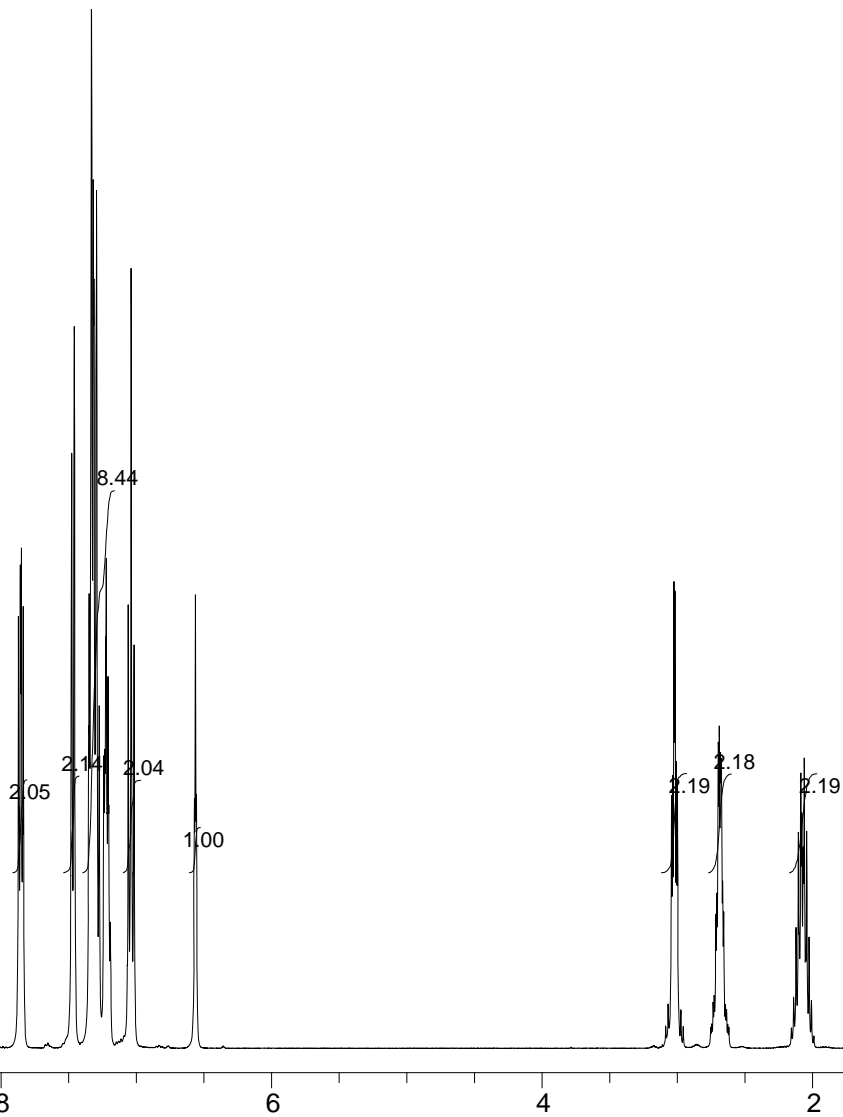

wpl-2-73C  
Oct 27 2017  
Pulse length = 4.000 usec  
Recycle delay = 1.000 sec  
NA = 1000  
Solvent = cdcl3  
FID PTS1d = 32768  
PTS1d = 32768  
F1 = 100.527557 MHz  
F2 = 399.749146 MHz

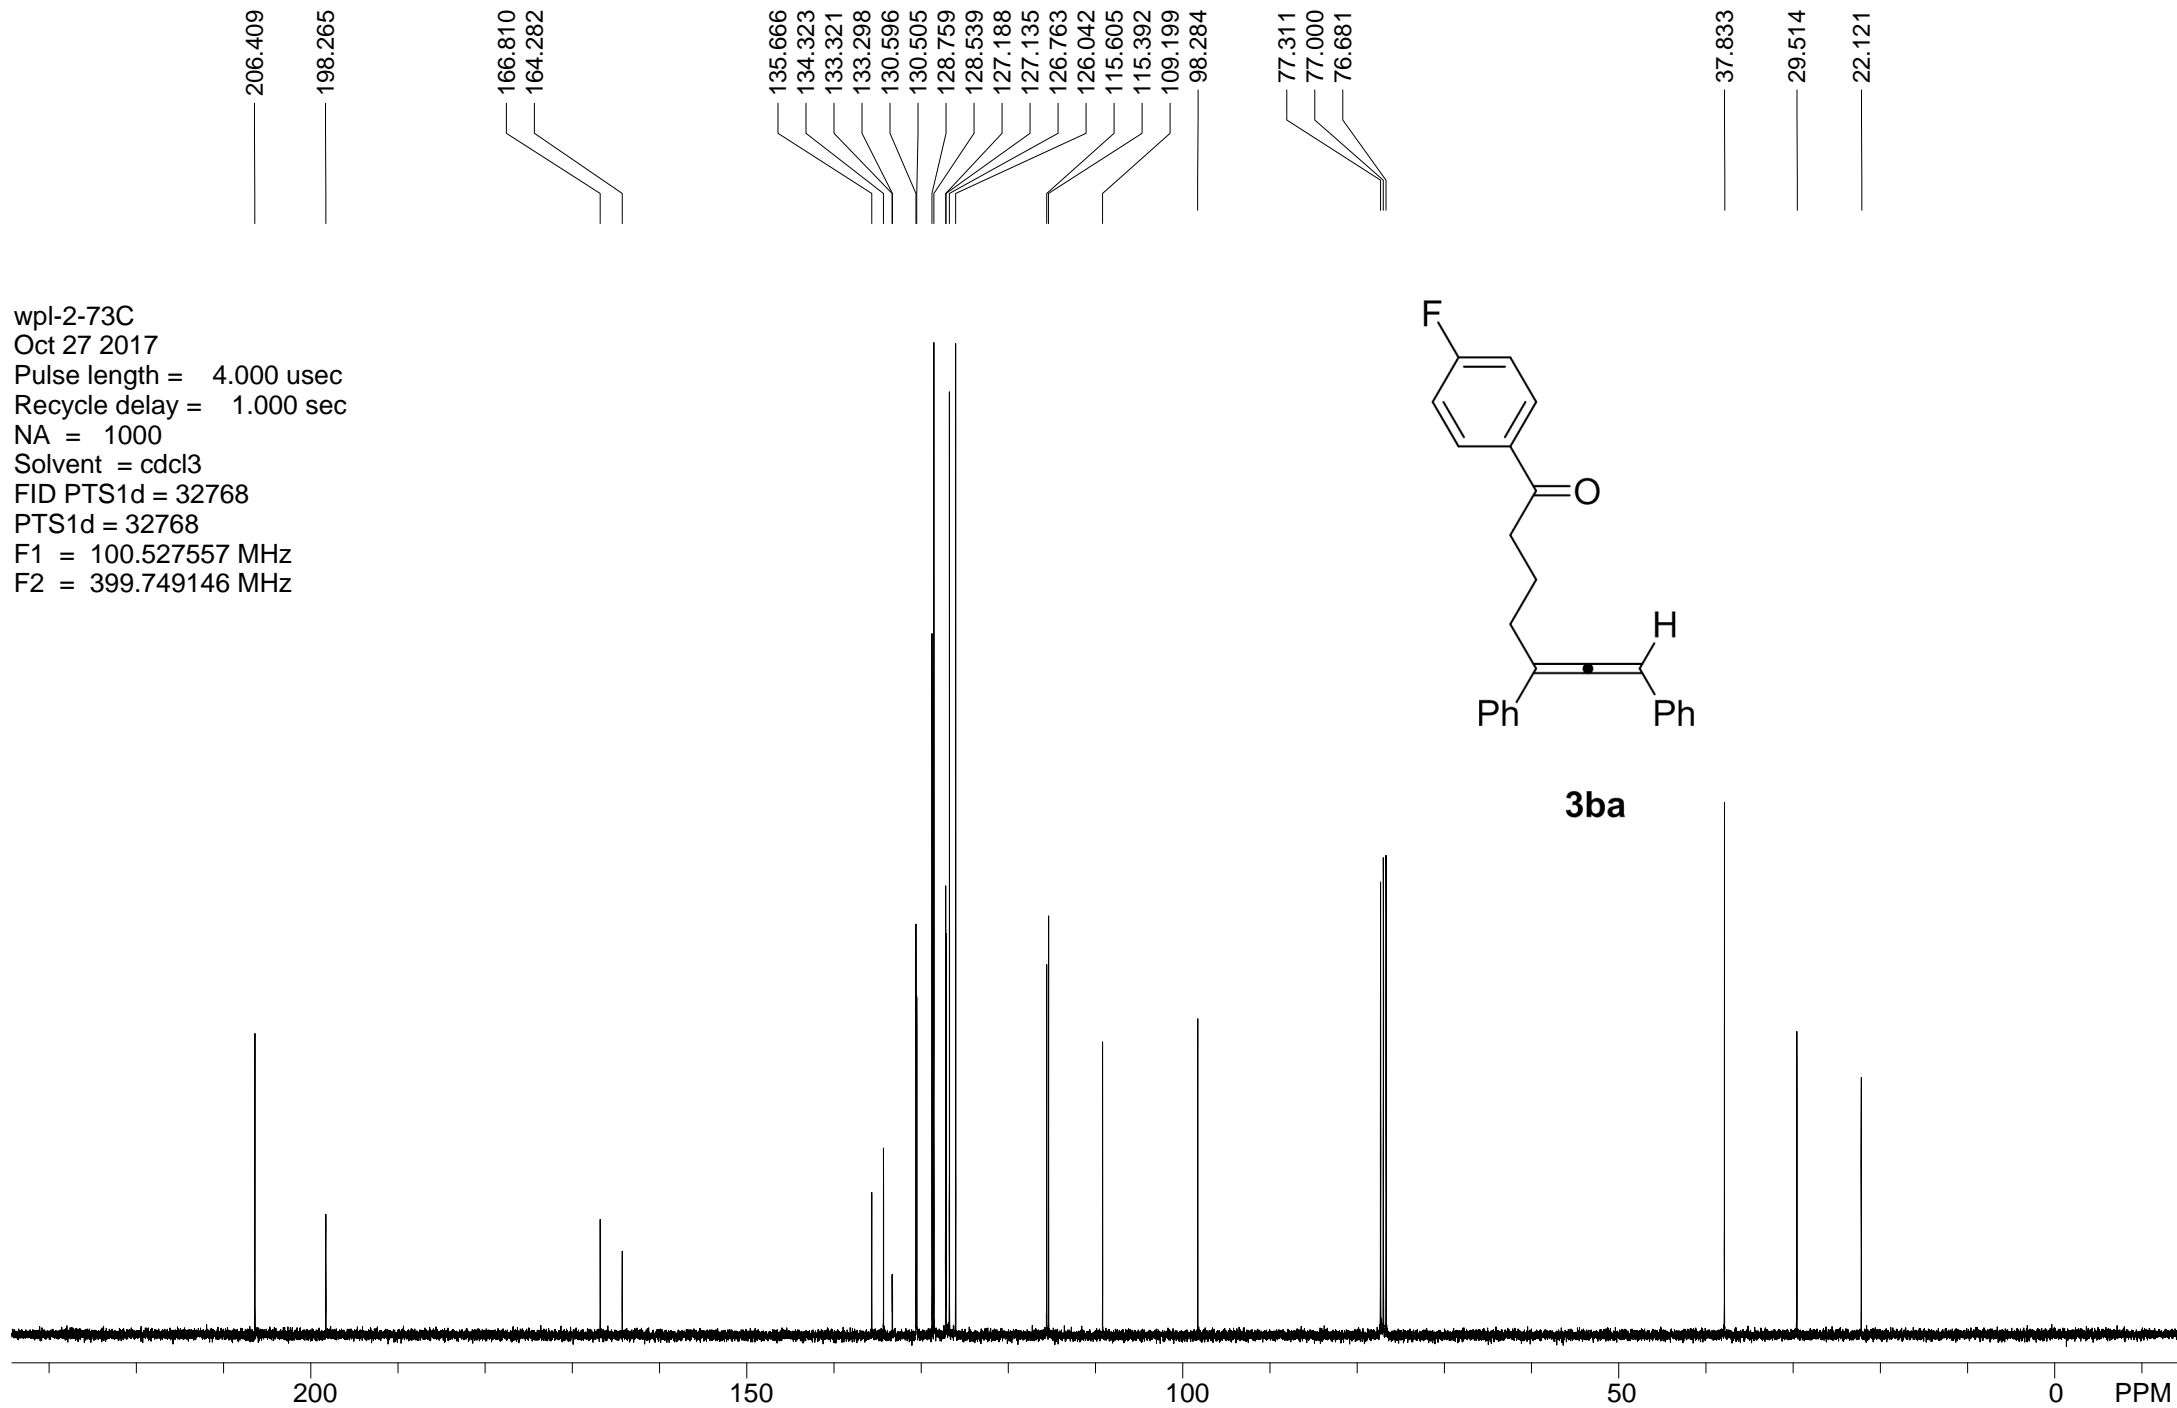

-0.000

-106.142

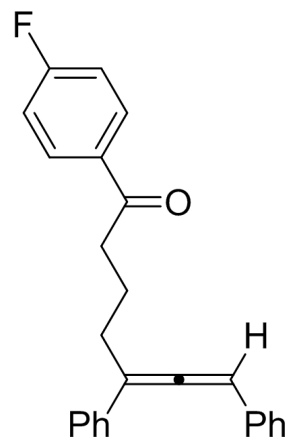

**3ba**

wpl-2-73F  
USER:  
Pulse length = 2.633 usec  
Recycle delay = 1.000 sec  
NA = 4  
Solvent = cdcl3  
FID PTS1d = 65536  
PTS1d = 65536  
F1 = 376.106171 MHz  
F2 = 100.526031 MHz

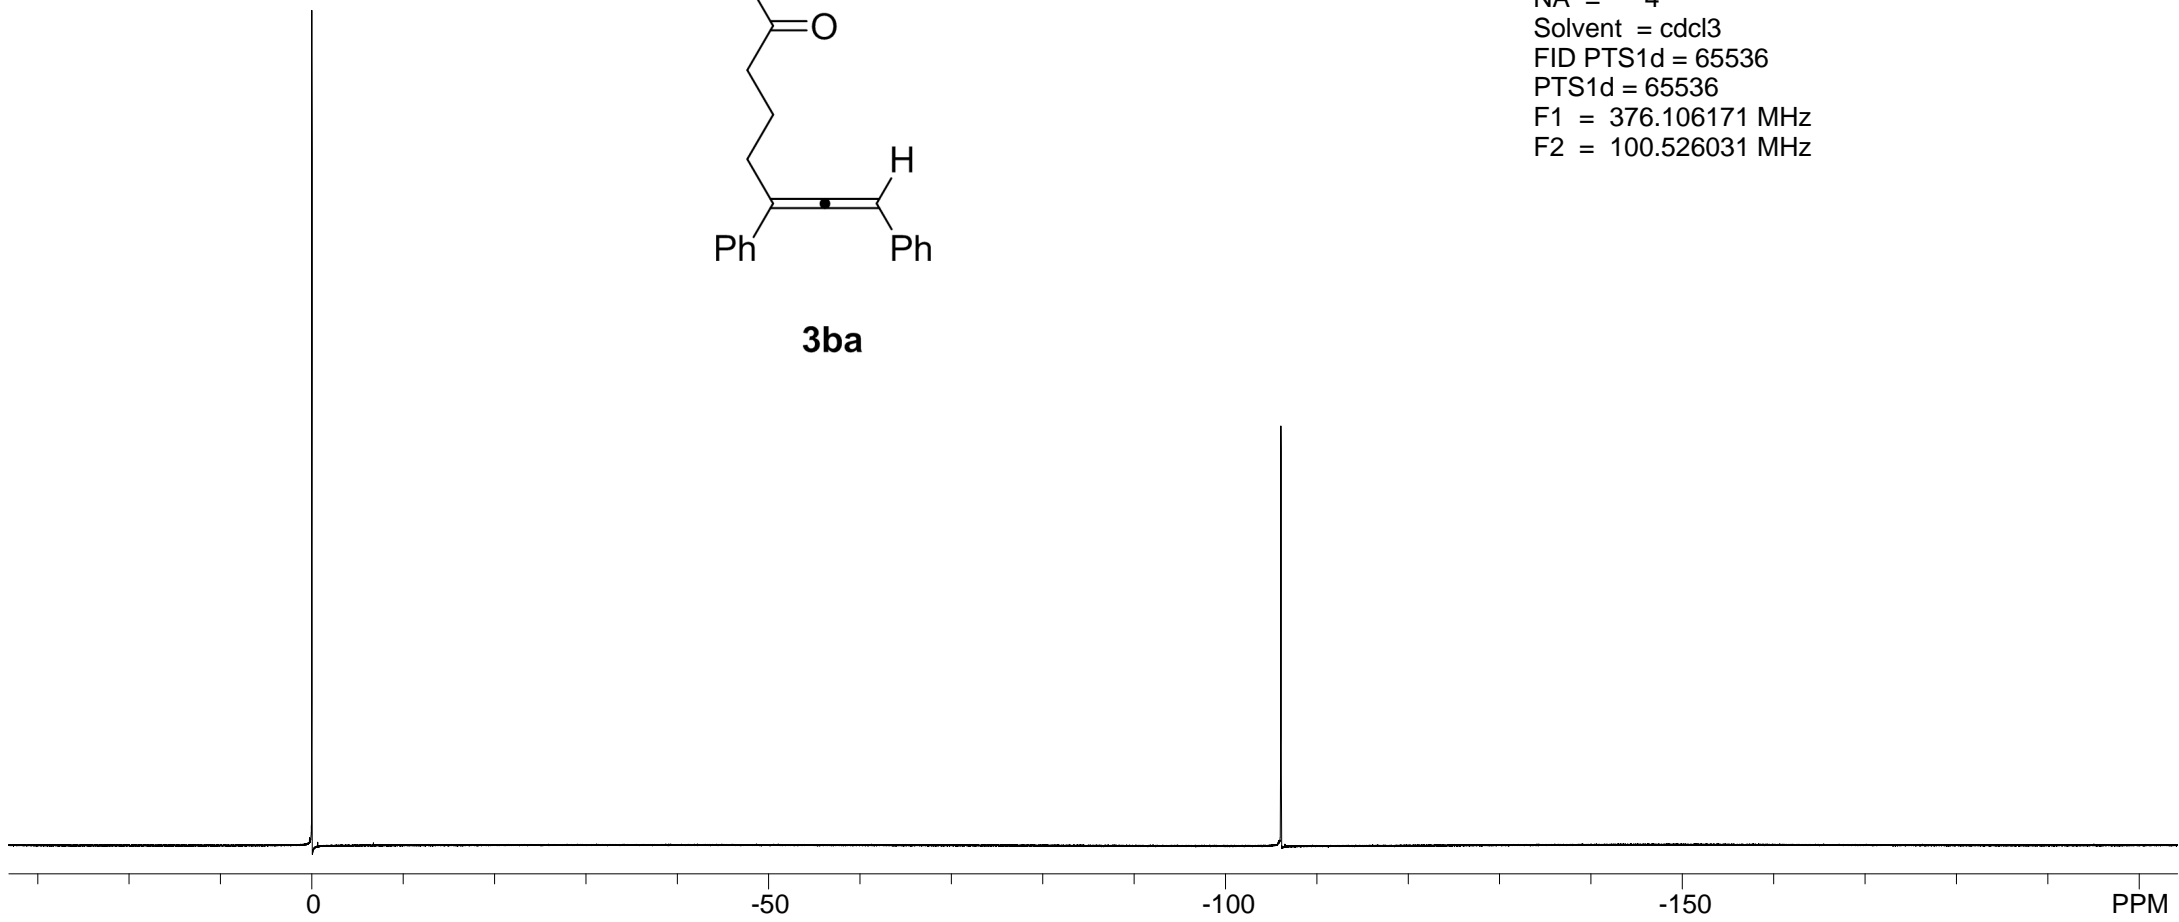

7.775  
7.771  
7.758  
7.754  
7.477  
7.458  
7.359  
7.354  
7.349  
7.337  
7.332  
7.329  
7.323  
7.319  
7.299  
7.280  
7.246  
7.239  
7.235  
7.228  
7.224  
7.218  
6.572  
6.565  
6.557  
3.043  
3.035  
3.026  
3.017  
3.007  
2.999  
2.697  
2.689  
2.683  
2.676  
2.086  
2.077  
2.060  
2.042  
1.587  
0.000

wpl-2-27H  
Oct 4 2017  
Pulse length = 8.650 usec  
Recycle delay = 6.000 sec  
NA = 4  
Solvent = CDCl3  
PTS1d = 65536  
F1 = 399.779999 MHz  
F2 = 1.000000 MHz

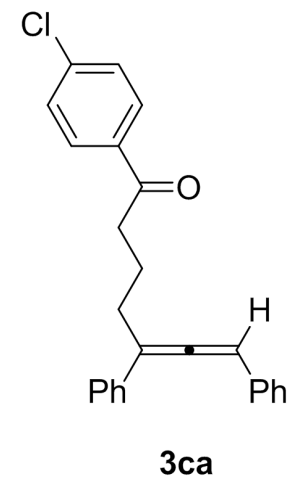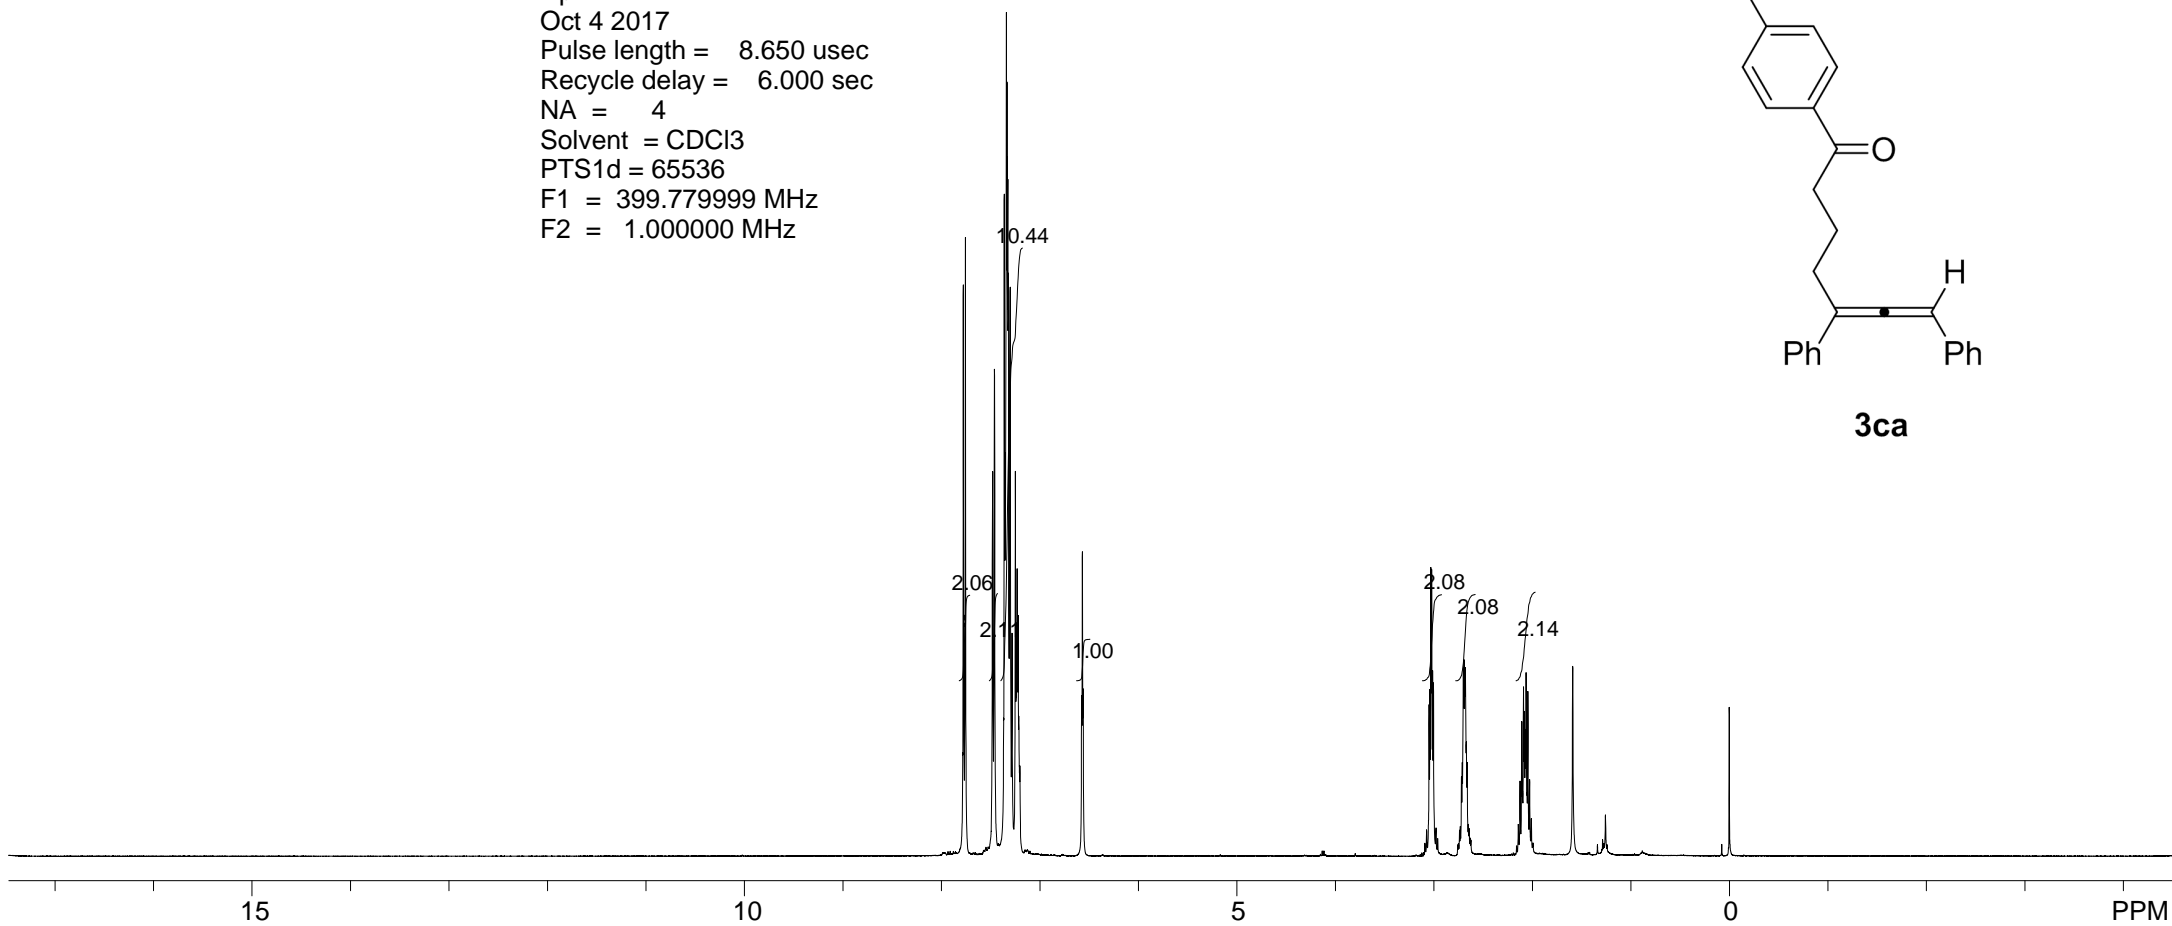

S12

wpl-2-27C  
Oct 3 2017  
Pulse length = 4.950 usec  
Recycle delay = 1.000 sec  
NA = 76  
Solvent = cdcl3  
FID PTS1d = 32768  
PTS1d = 32768  
F1 = 100.520737 MHz  
F2 = 399.722015 MHz

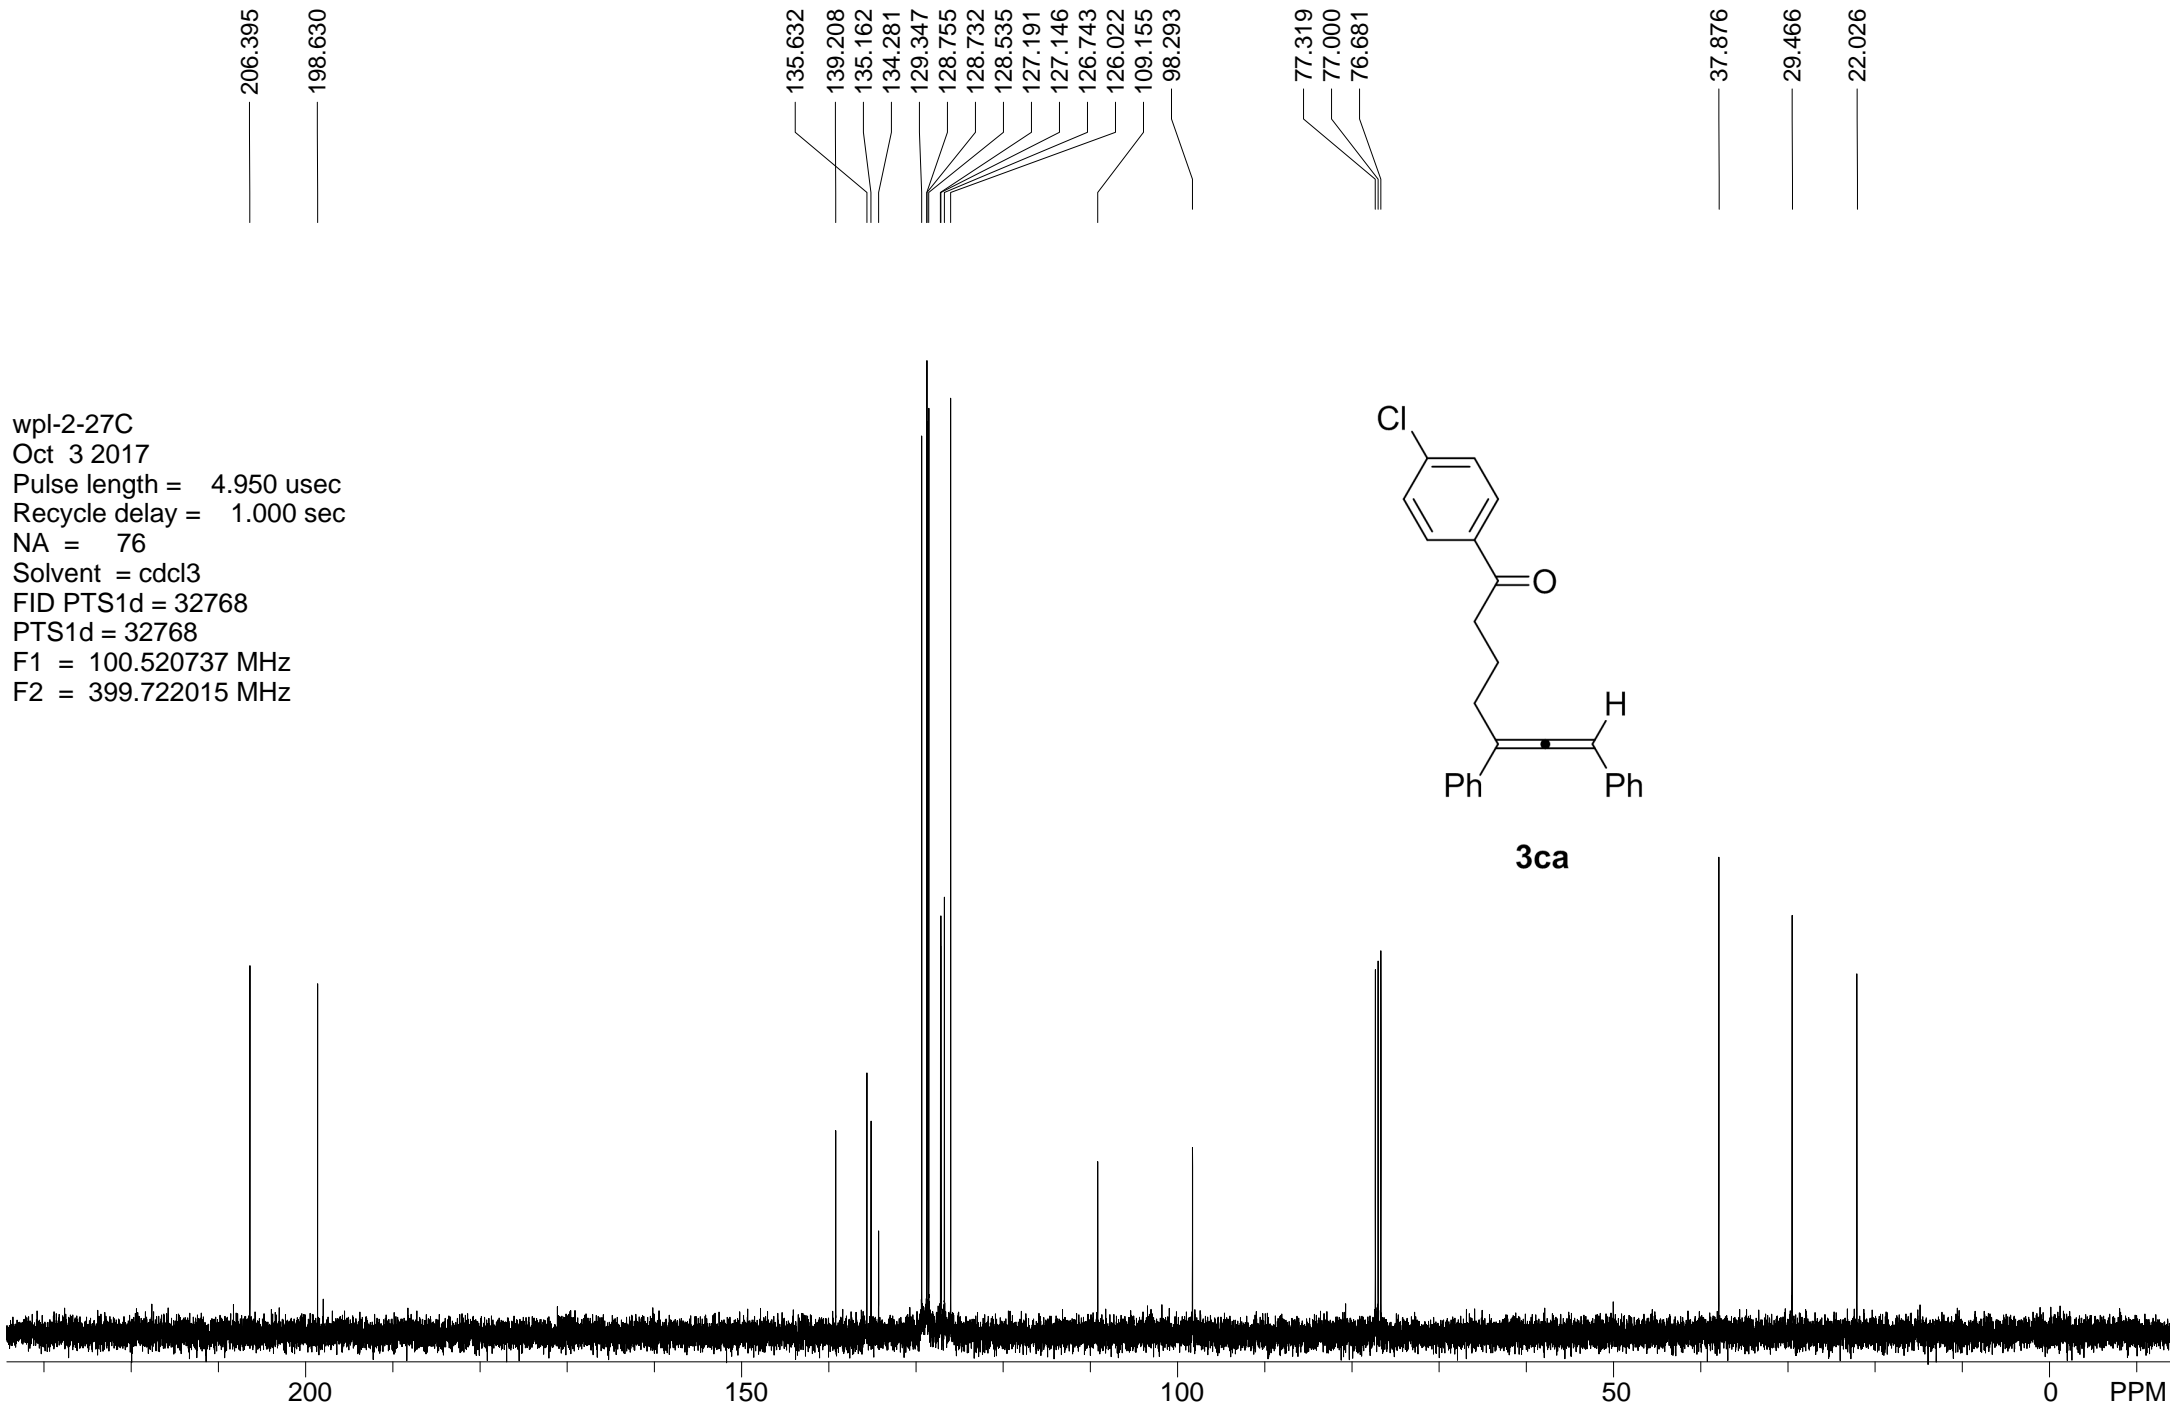

7.860  
7.855  
7.843  
7.838  
7.483  
7.480  
7.461  
7.362  
7.358  
7.337  
7.319  
7.301  
7.281  
7.253  
7.240  
7.233  
7.229  
7.226  
7.222  
7.217  
7.212  
7.206  
7.197  
7.194  
6.875  
6.870  
6.858  
6.854  
6.570  
6.563  
6.555  
3.850  
3.035  
3.018  
2.999  
2.715  
2.707  
2.697  
2.690  
2.679  
2.671  
2.661  
2.654  
2.099  
2.081  
2.076  
2.062  
2.057  
2.039  
1.589  
-0.000

wpl-2-7H  
Jul 20 2017  
NA = 4  
Solvent = cdcl3  
F1 = 399.749542 MHz  
F2 = 100.526031 MHz

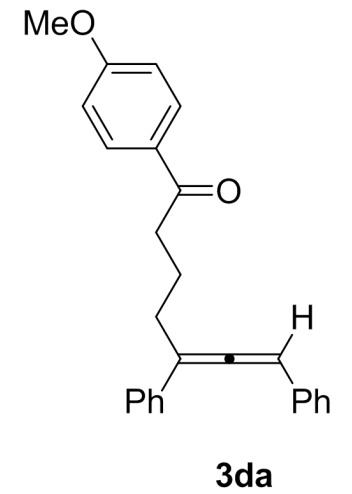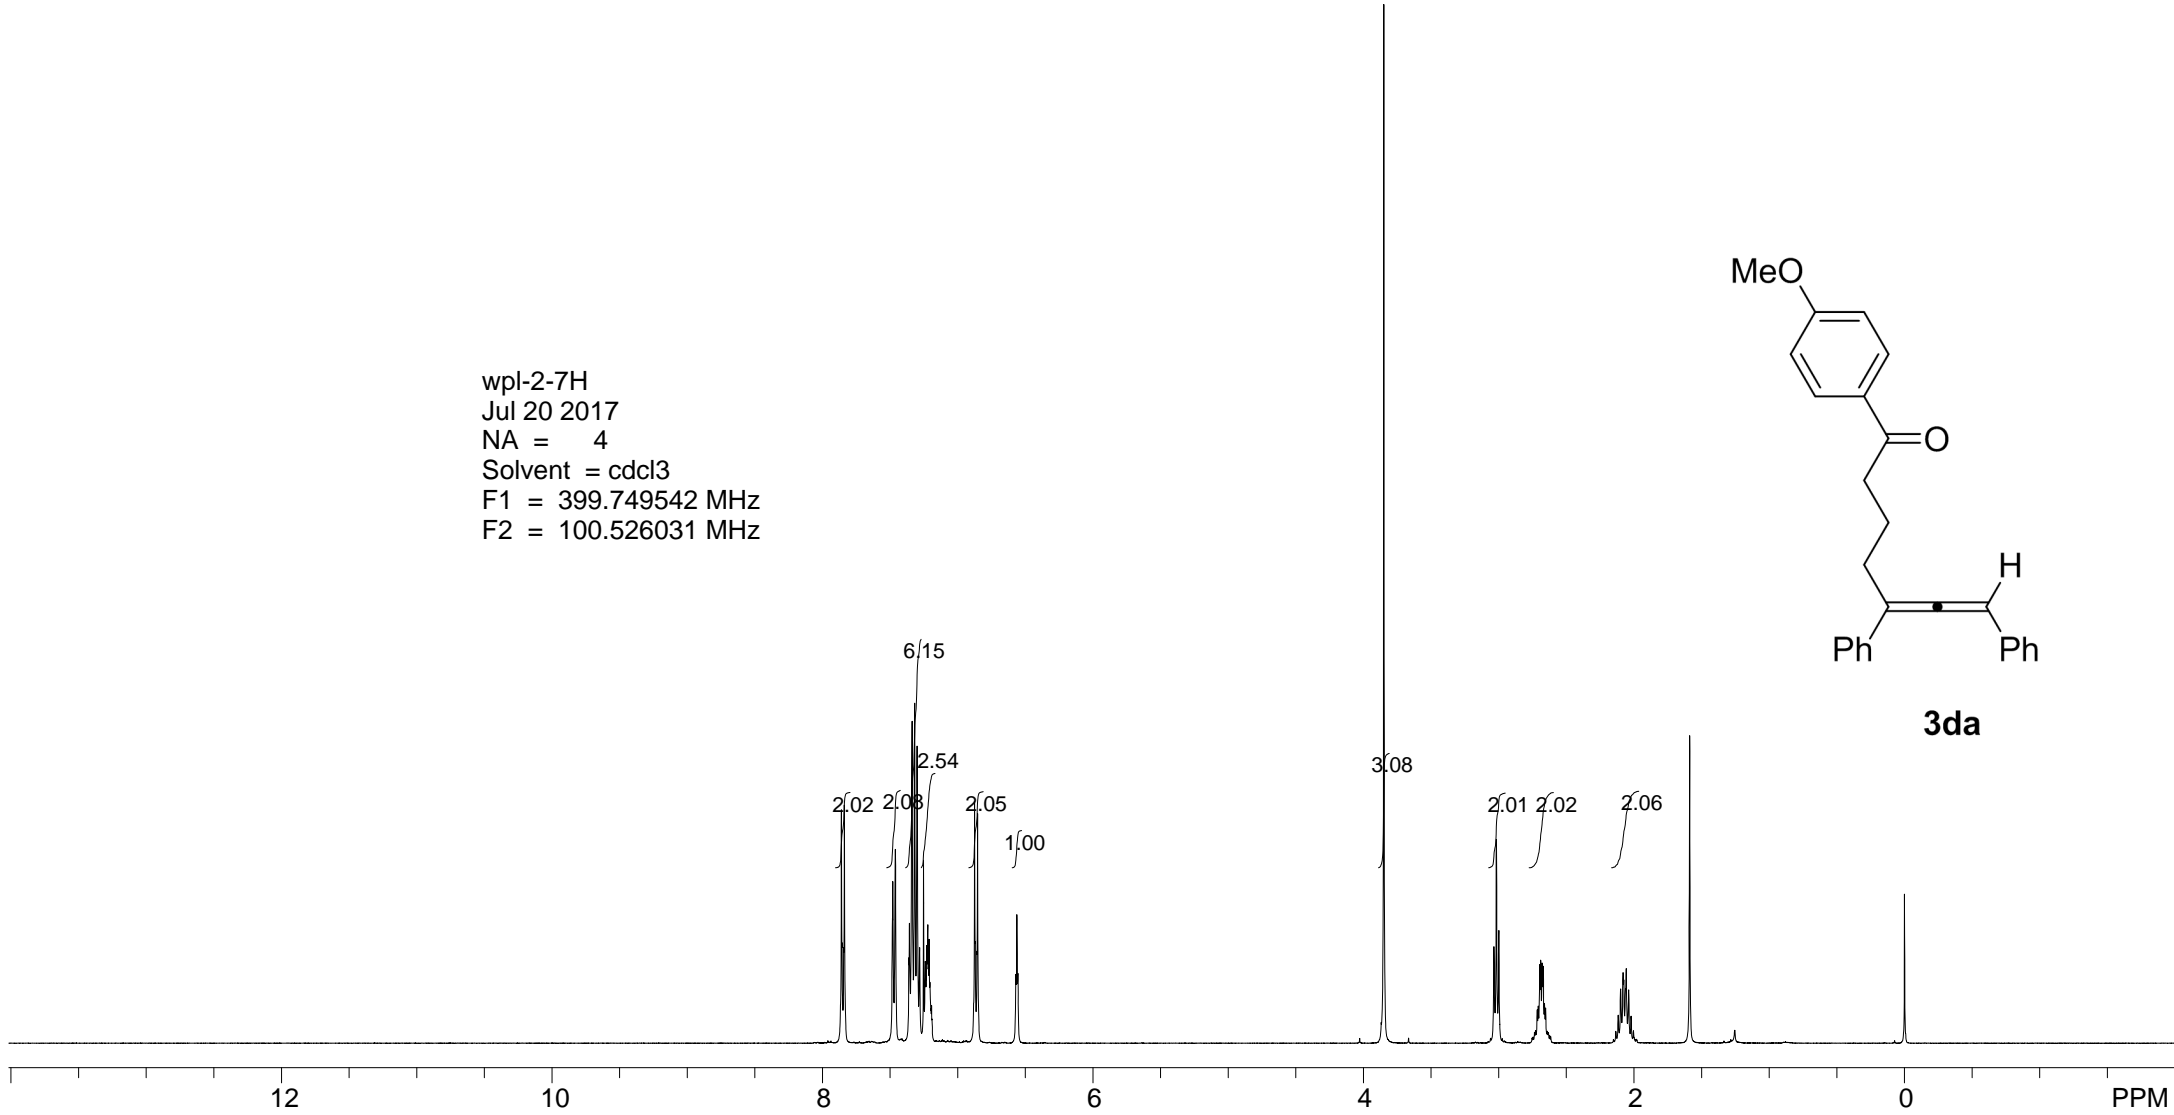



wpl-2-7C  
Jul 21 2017  
NA = 1000  
Solvent = cdcl3  
F1 = 100.527557 MHz  
F2 = 399.749146 MHz

206.424

198.583

163.265

135.765

134.391

130.239

130.027

128.736

128.516

127.127

127.082

126.778

126.072

113.586

109.343

98.223

77.319

77.000

76.681

55.390

37.659

29.666

22.470

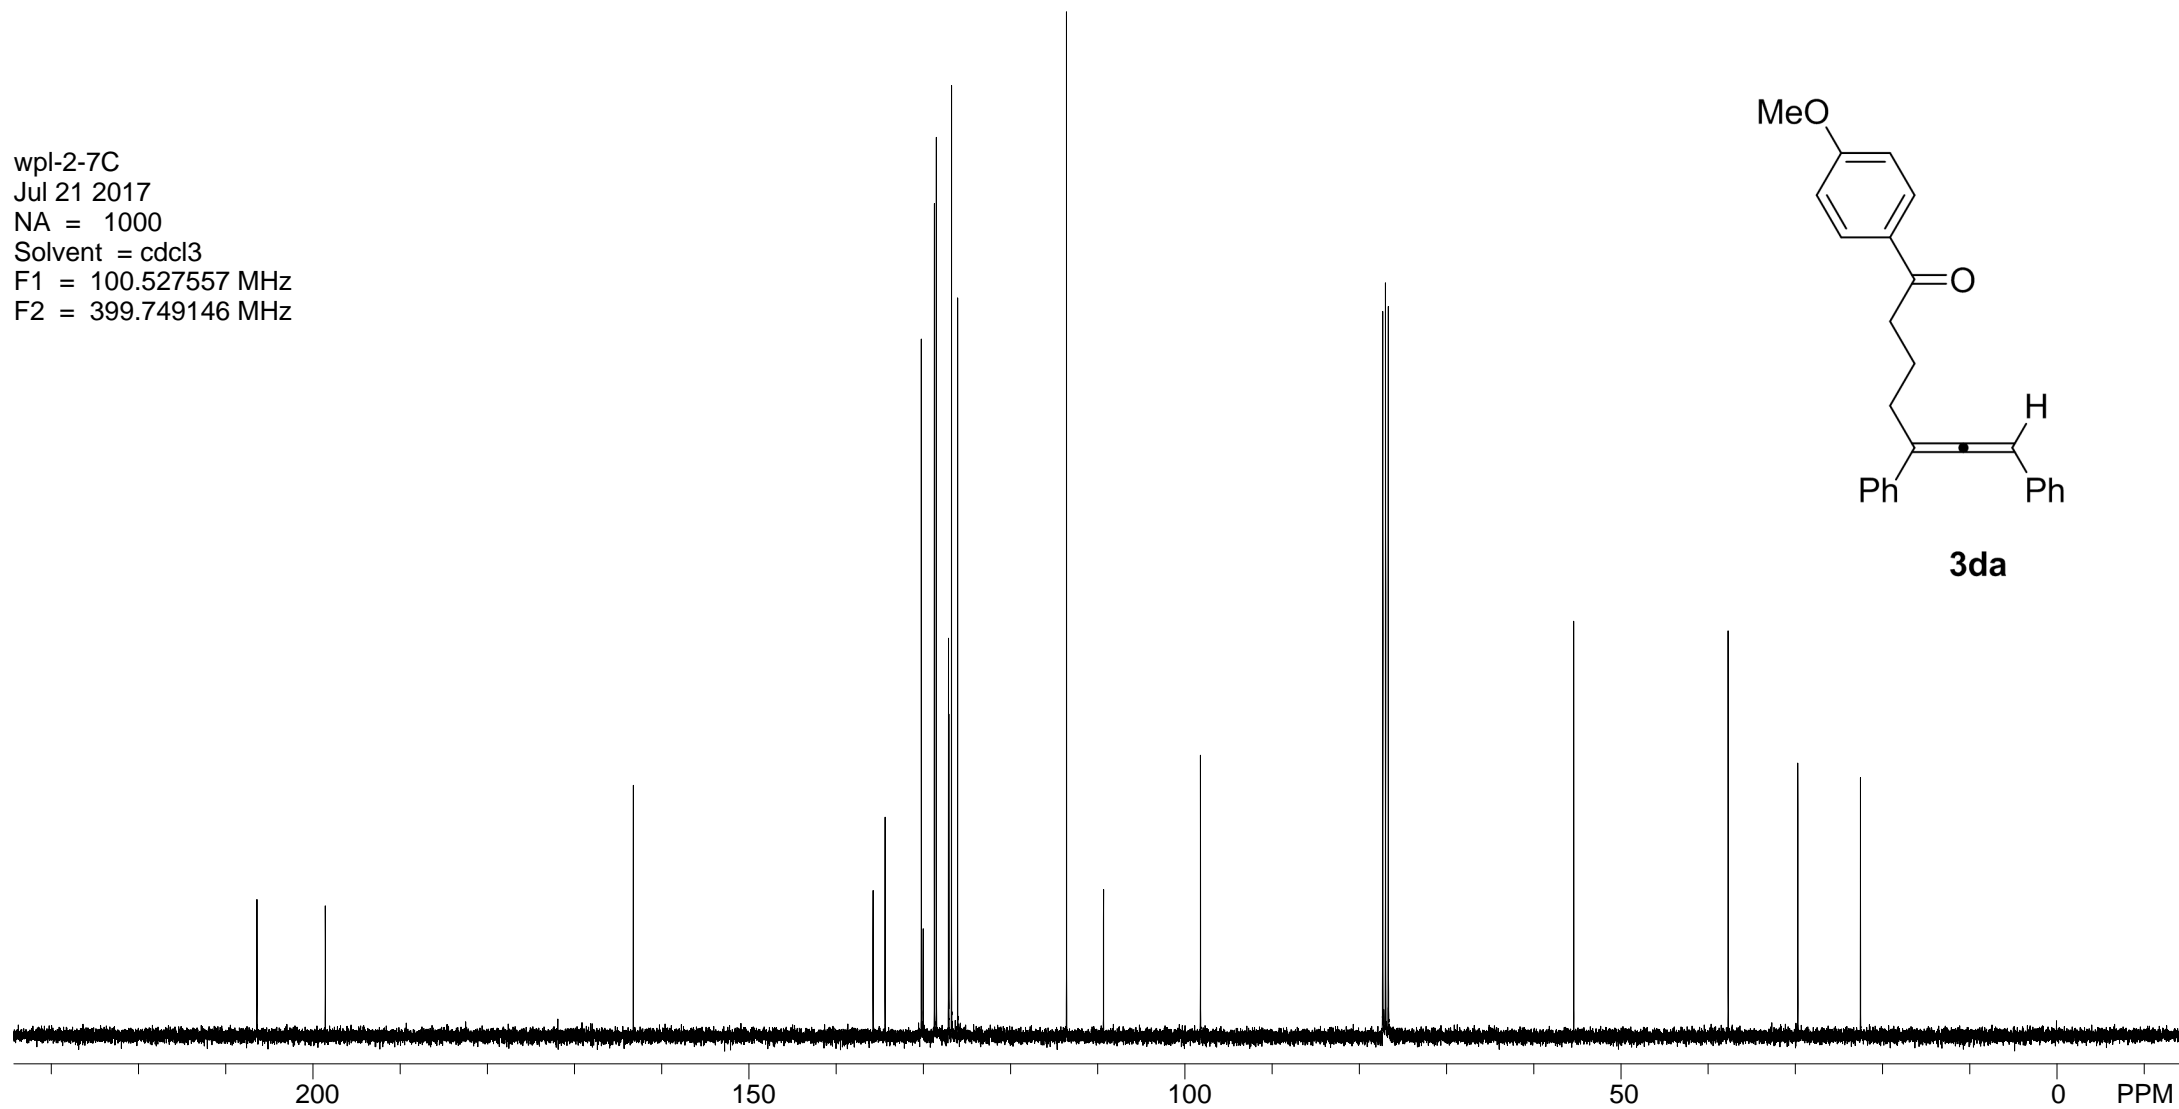

S15

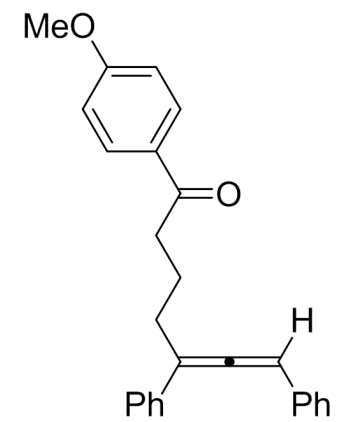

3da

7.479  
7.460  
7.441  
7.437  
7.420  
7.354  
7.350  
7.337  
7.332  
7.320  
7.317  
7.312  
7.297  
7.293  
7.275  
7.251  
7.240  
7.221  
7.203  
7.090  
7.086  
7.082  
7.067  
7.063  
6.567  
6.560  
6.552  
3.823  
3.079  
3.061  
3.043  
2.701  
2.694  
2.682  
2.674  
2.107  
2.090  
2.072  
2.054  
1.574  
0.000

wpl-2-71H  
Oct 24 2017  
Pulse length = 3.400 usec  
Recycle delay = 10.000 sec  
NA = 4  
Solvent = cdcl3  
FID PTS1d = 16384  
PTS1d = 16384  
F1 = 399.749542 MHz  
F2 = 100.526031 MHz

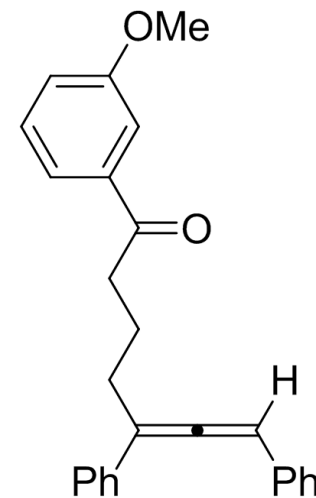

**3ea**

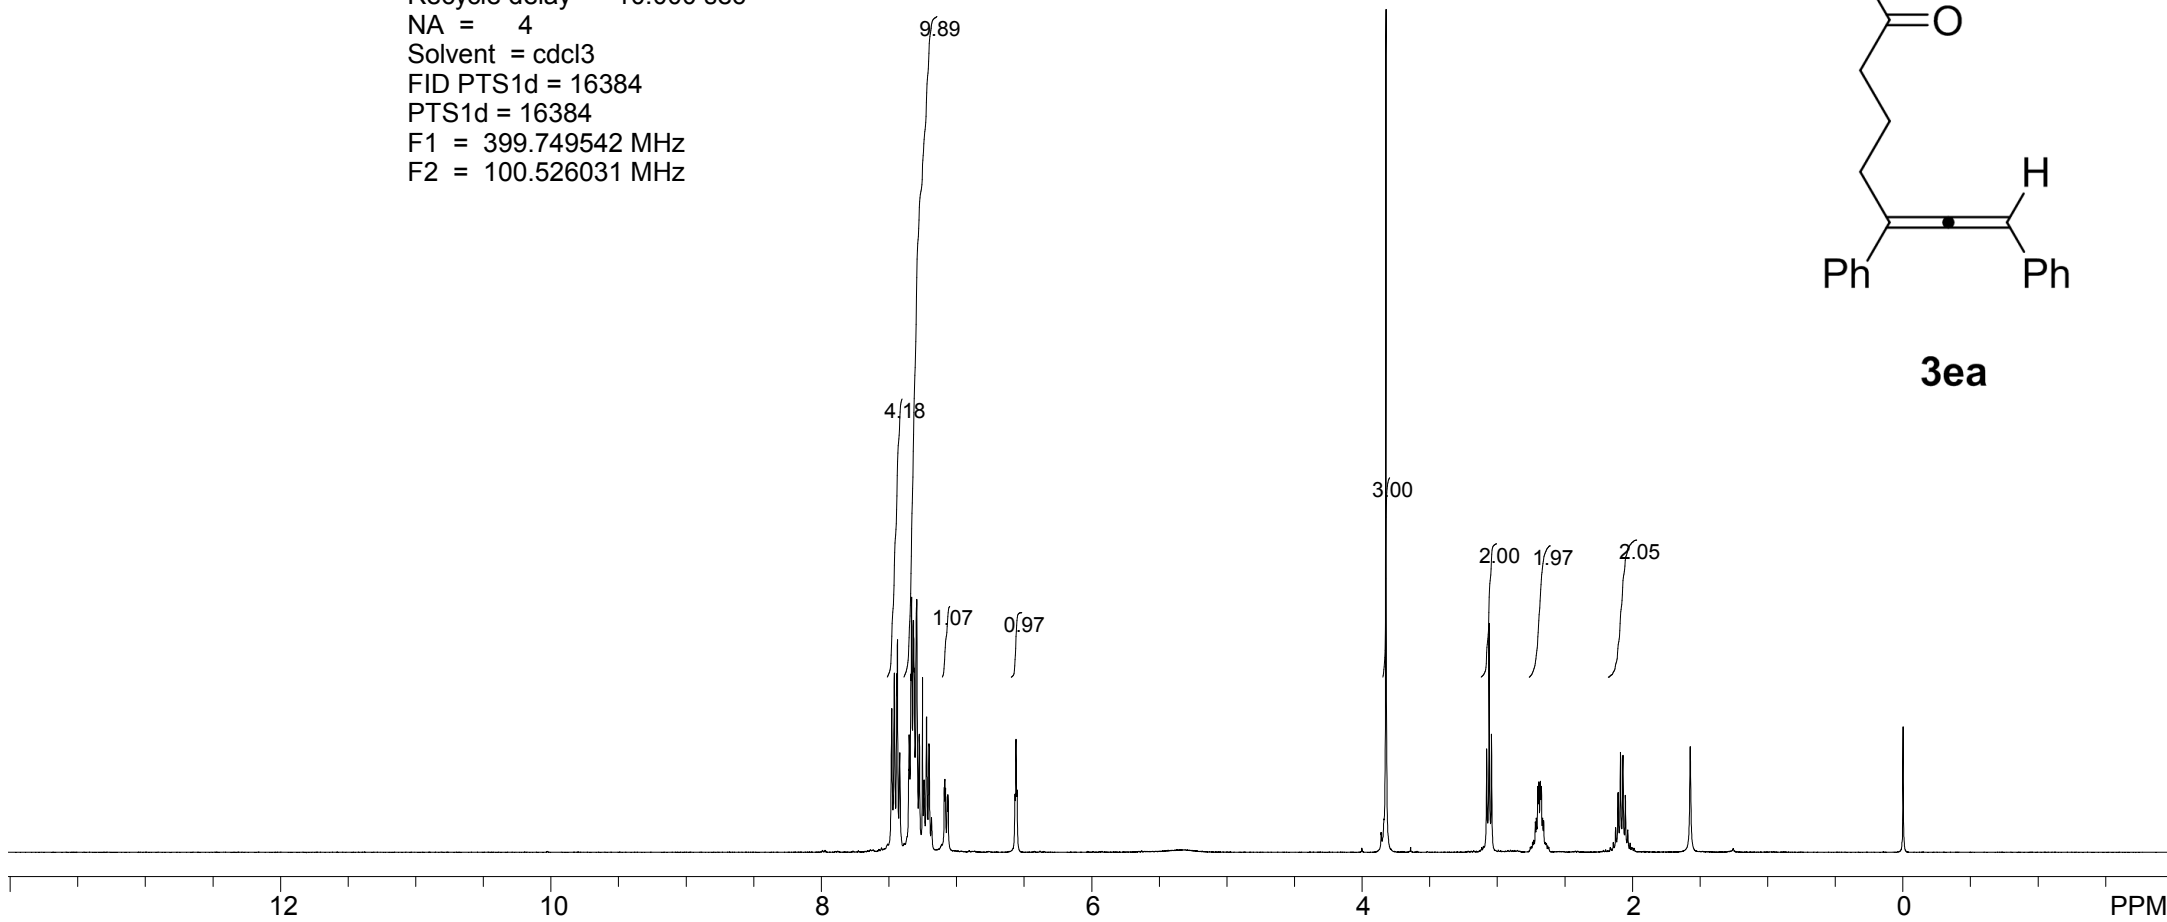

wpl-2-71C  
Oct 25 2017  
Pulse length = 4.000 usec  
Recycle delay = 1.000 sec  
NA = 1000  
Solvent = cdcl3  
FID PTS1d = 32768  
PTS1d = 32768  
F1 = 100.527557 MHz  
F2 = 399.749146 MHz

206.348  
199.638

159.698

138.247  
135.689  
134.285  
129.404  
128.691  
128.478  
127.051  
126.710  
126.011  
120.607  
119.324  
112.098  
109.244  
98.238  
98.162

77.319  
77.000  
76.681

55.314

38.023

29.529

22.258

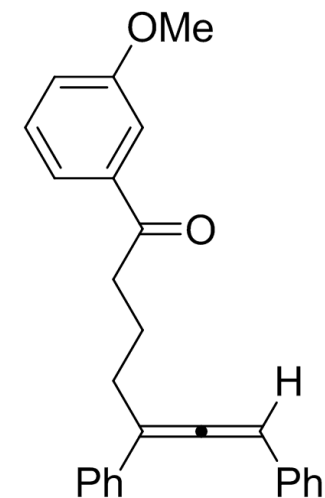

3a

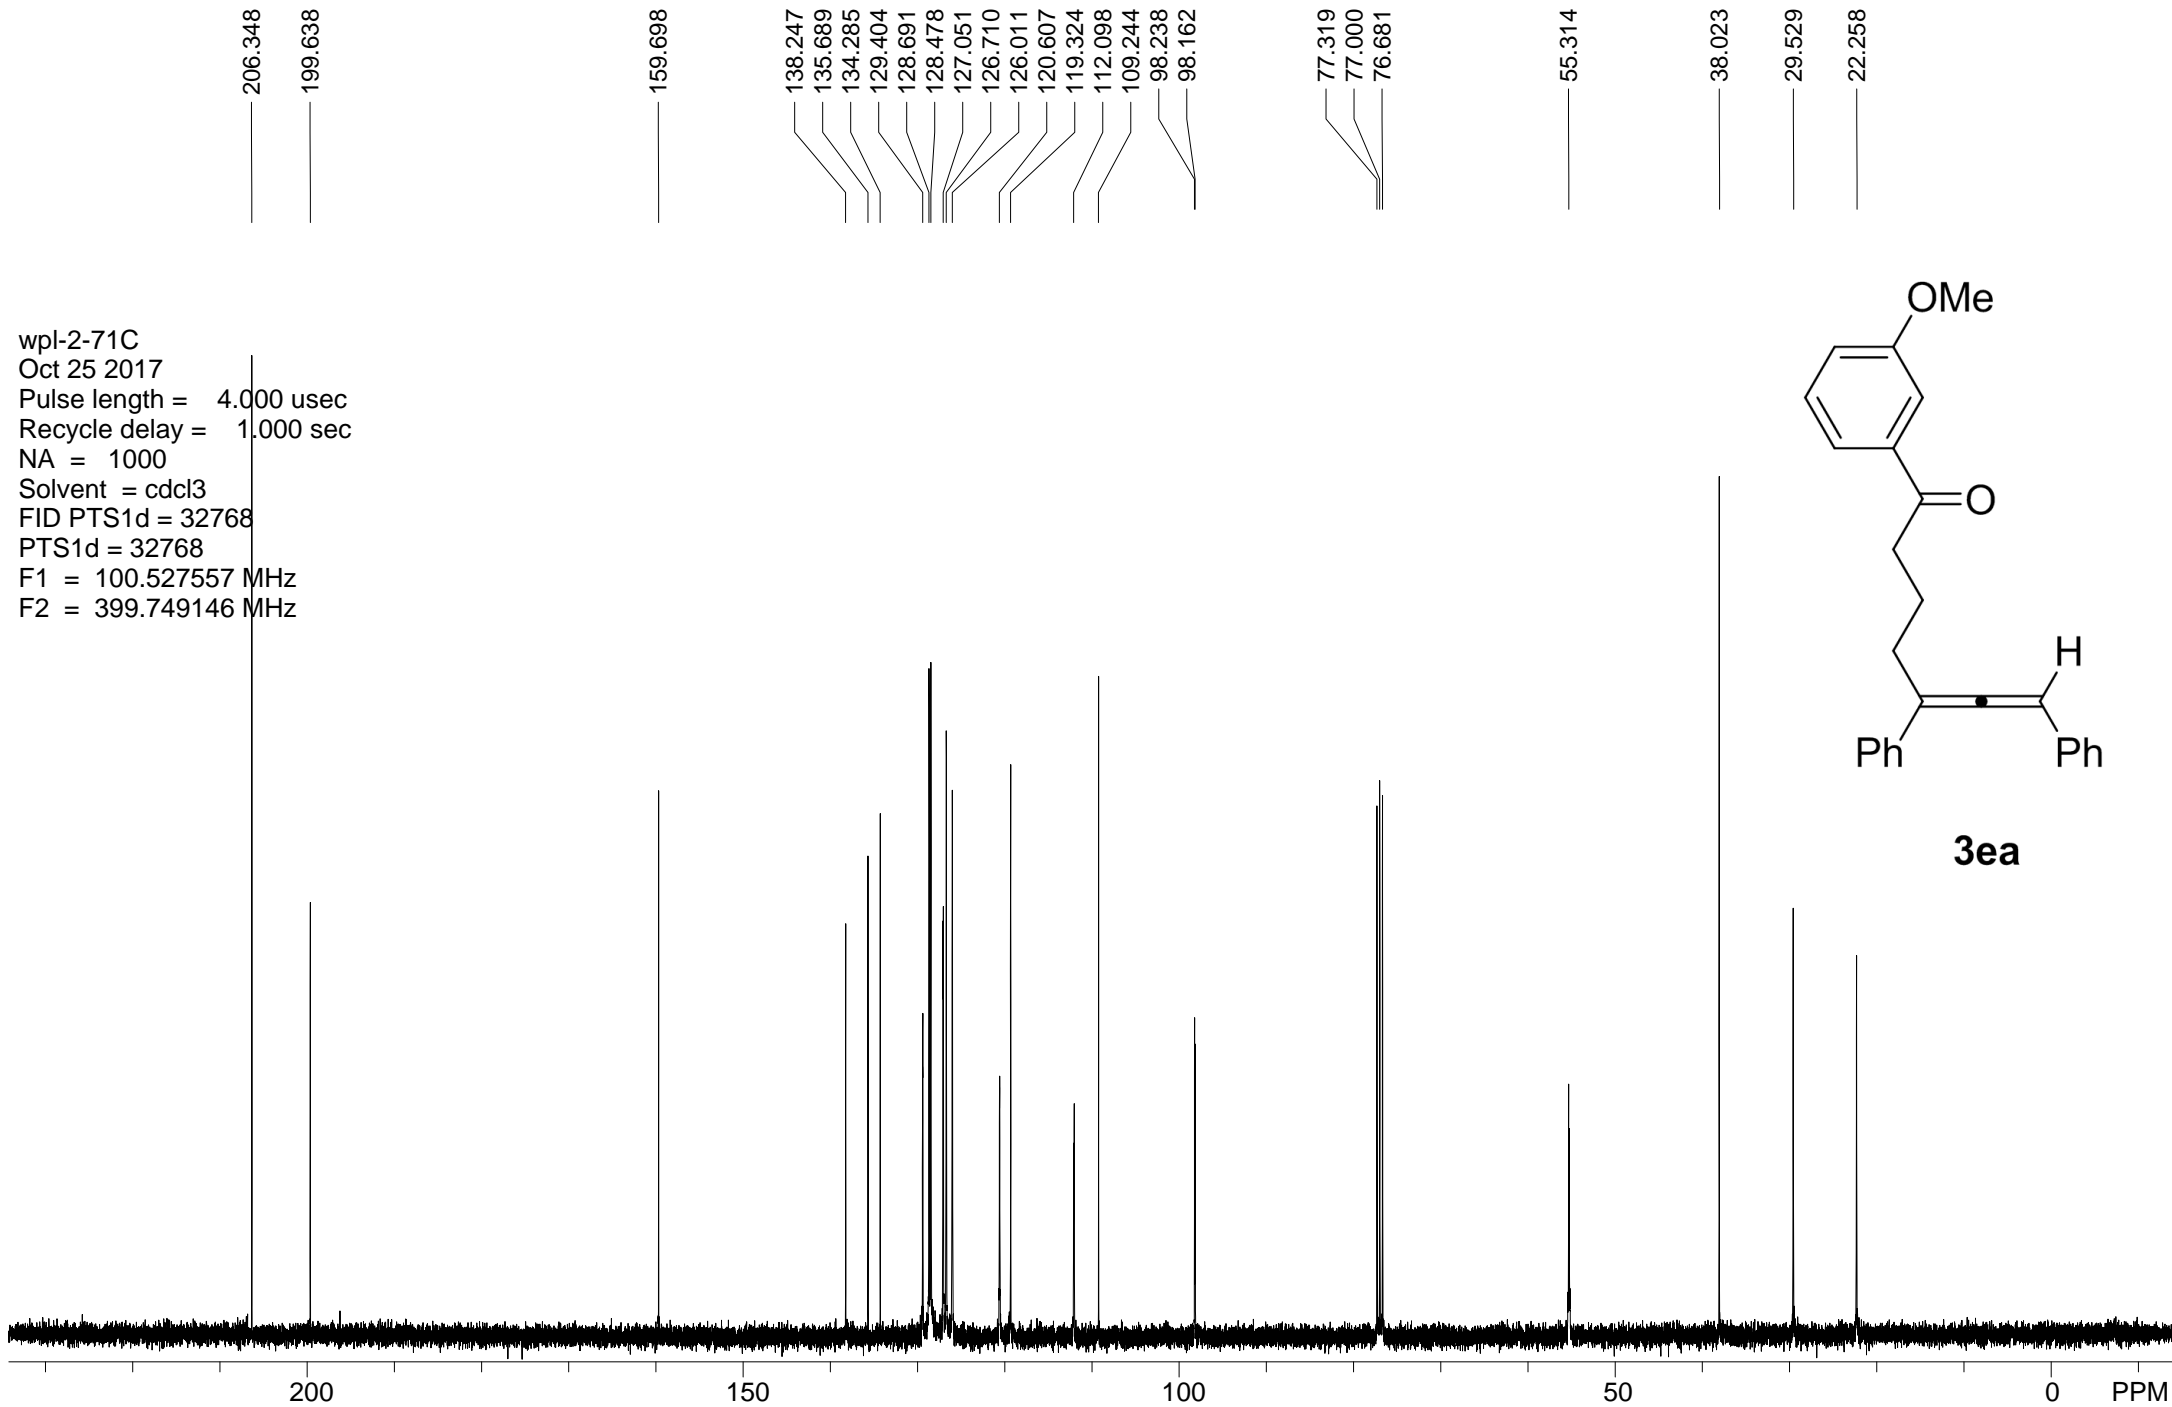

wpl-2-70H  
Oct 27 2017  
Pulse length = 3.400 usec  
Recycle delay = 1.000 sec  
NA = 8  
Solvent = cdcl3  
FID PTS1d = 16384  
PTS1d = 16384  
F1 = 399.749542 MHz  
F2 = 100.526031 MHz

7.633  
7.613  
7.463  
7.446  
7.412  
7.390  
7.320  
7.306  
7.301  
7.284  
7.281  
7.267  
7.247  
7.222  
7.201  
7.196  
7.179  
7.160  
6.974  
6.956  
6.938  
6.910  
6.889  
6.527  
6.520  
6.513  
3.776  
3.099  
3.081  
3.063  
2.675  
2.656  
2.650  
2.637  
2.625  
2.617  
2.066  
2.049  
2.042  
2.030  
2.024  
2.012  
2.005  
1.987  
1.621  
0.000

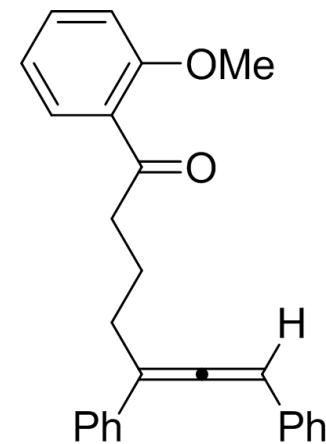

**3fa**

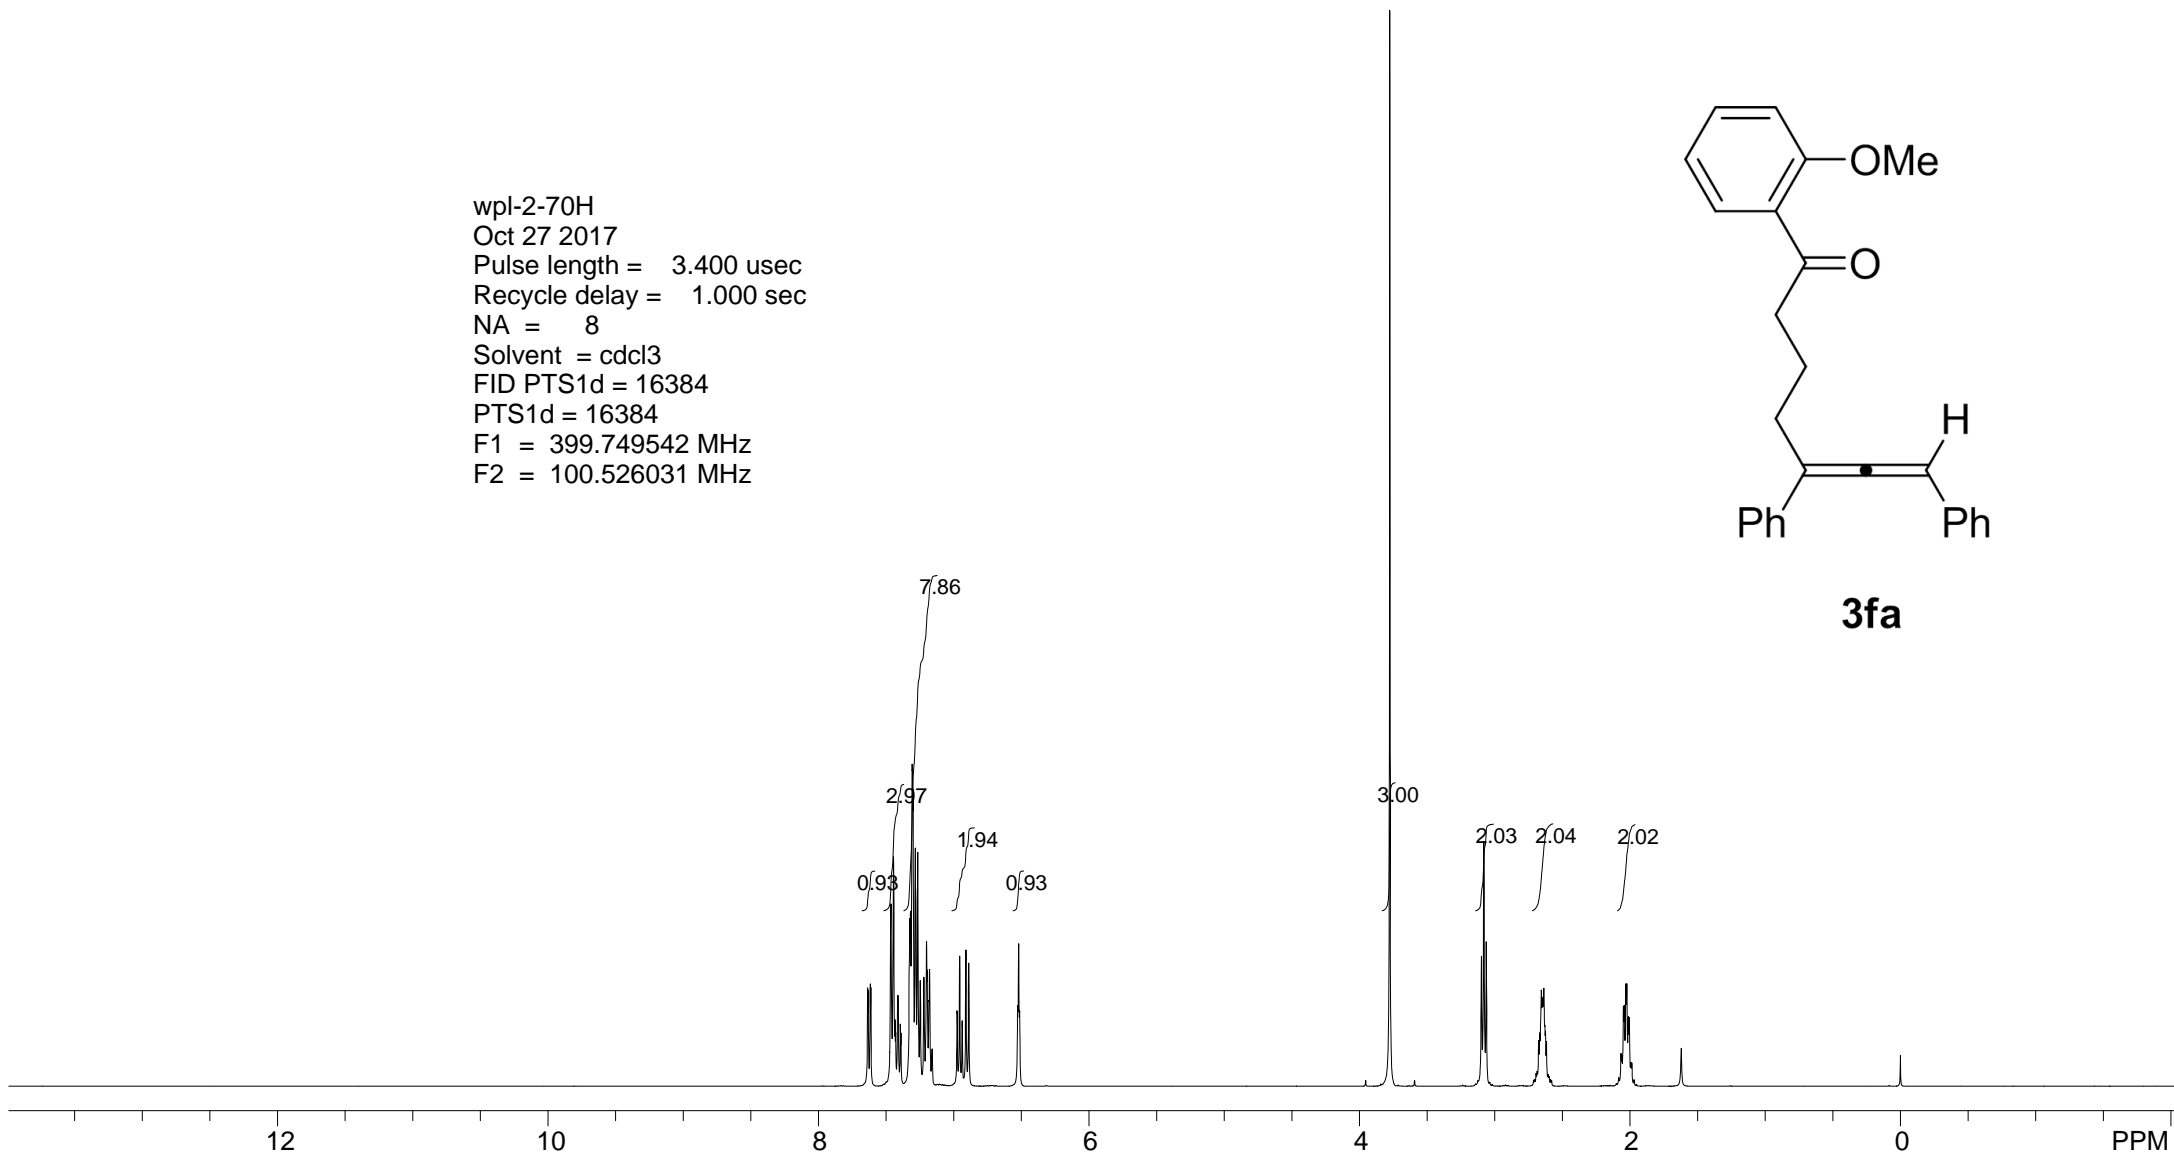

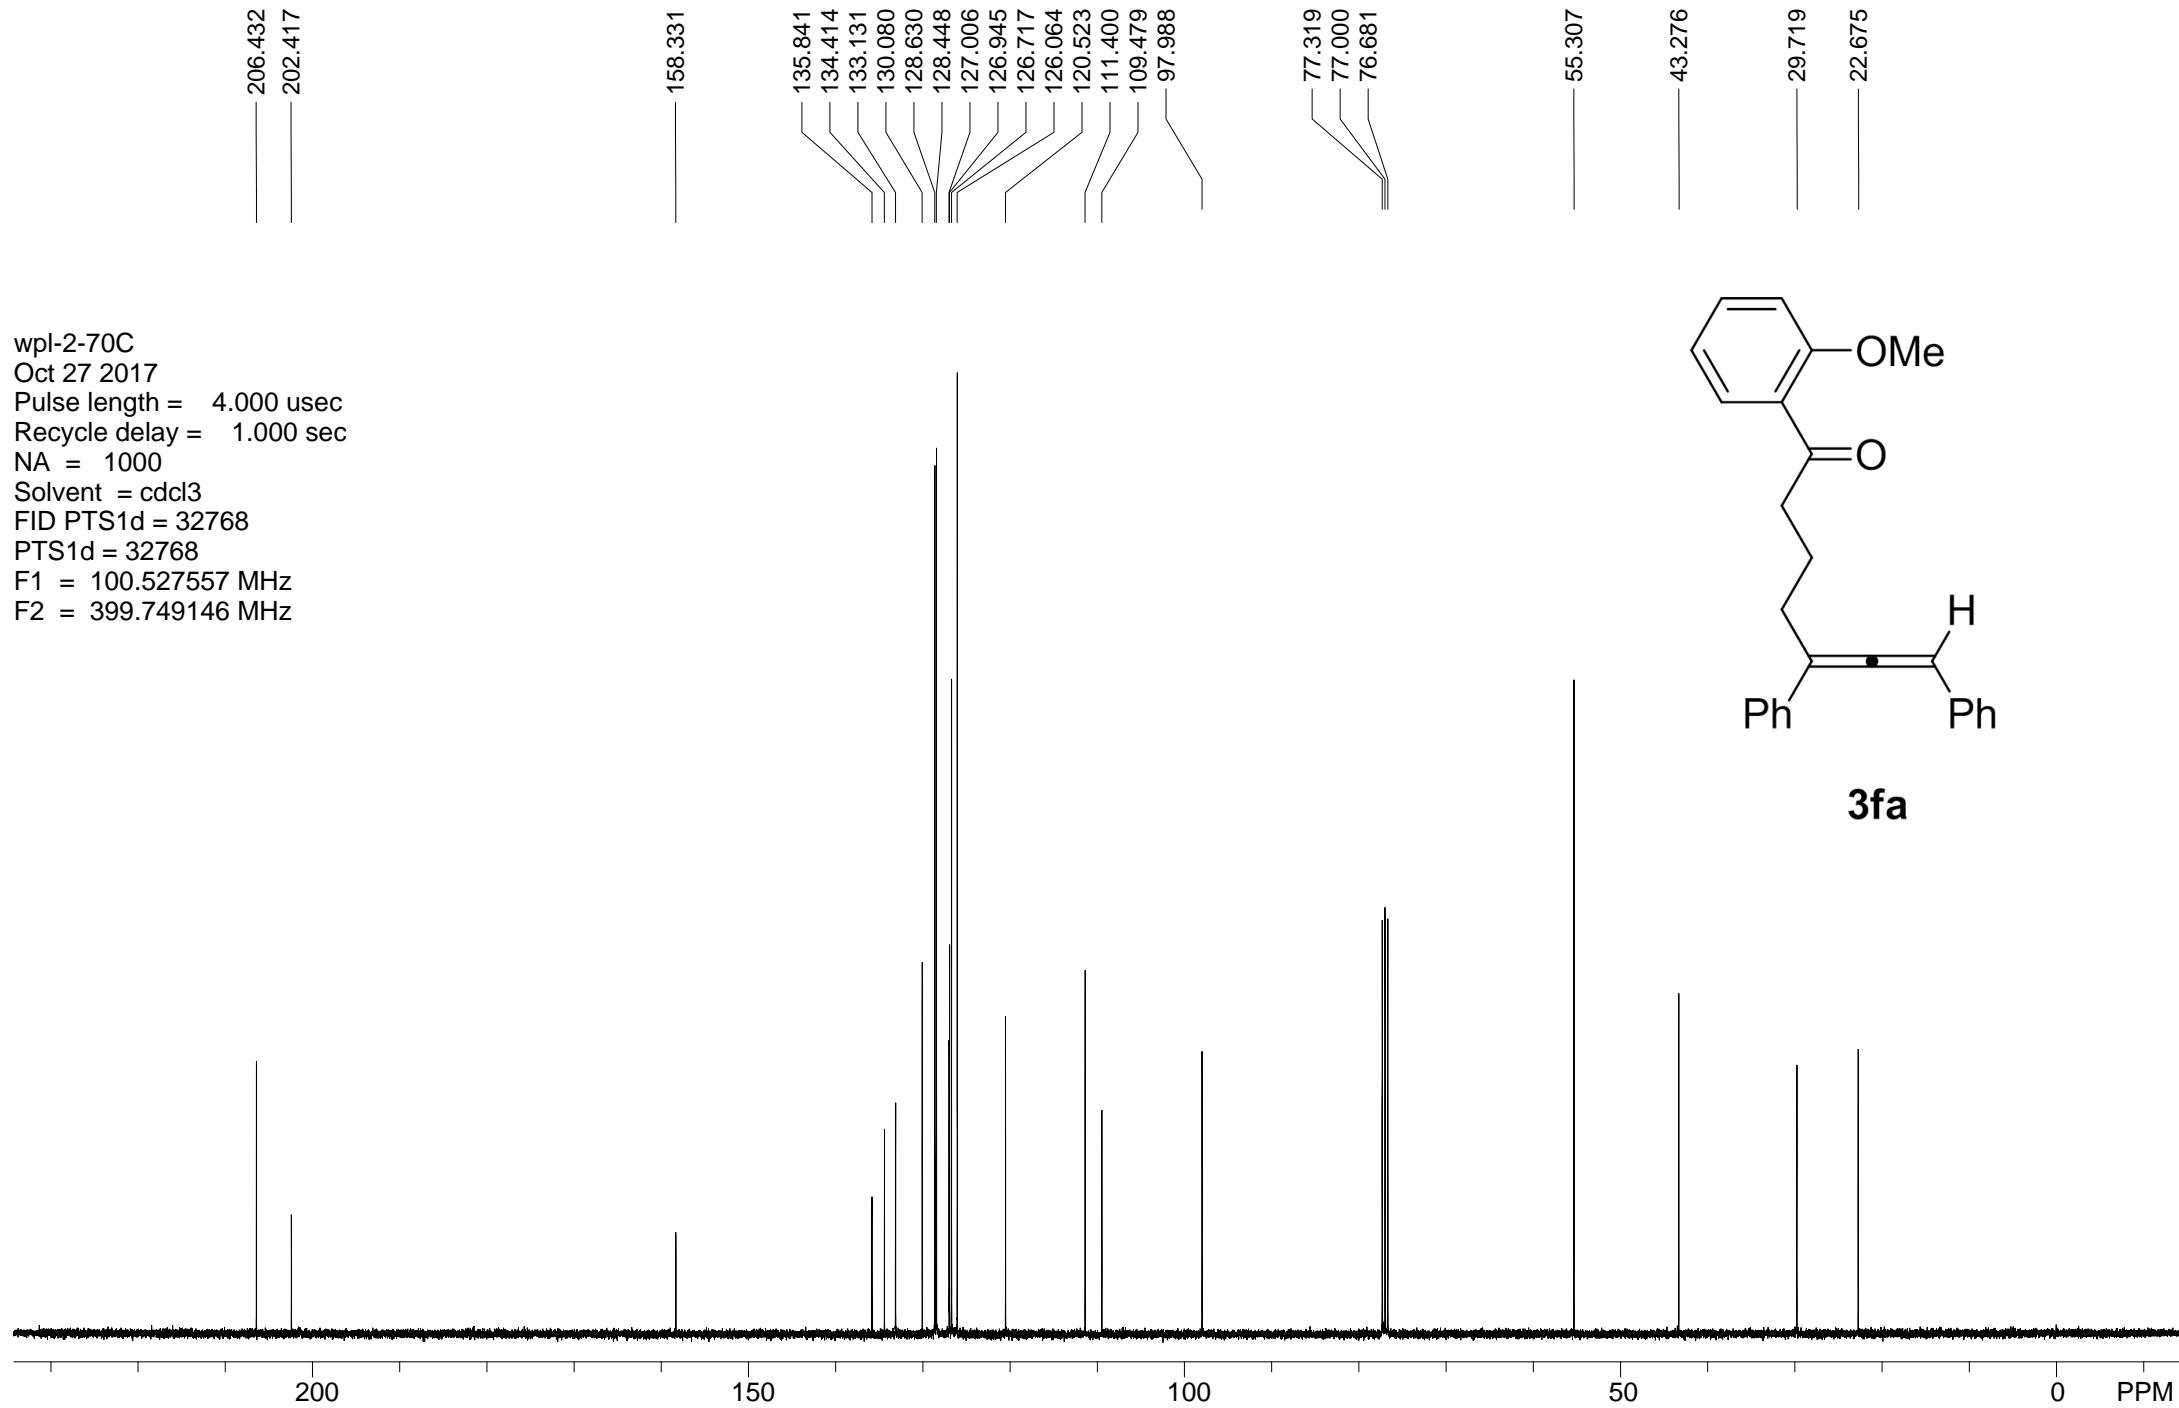

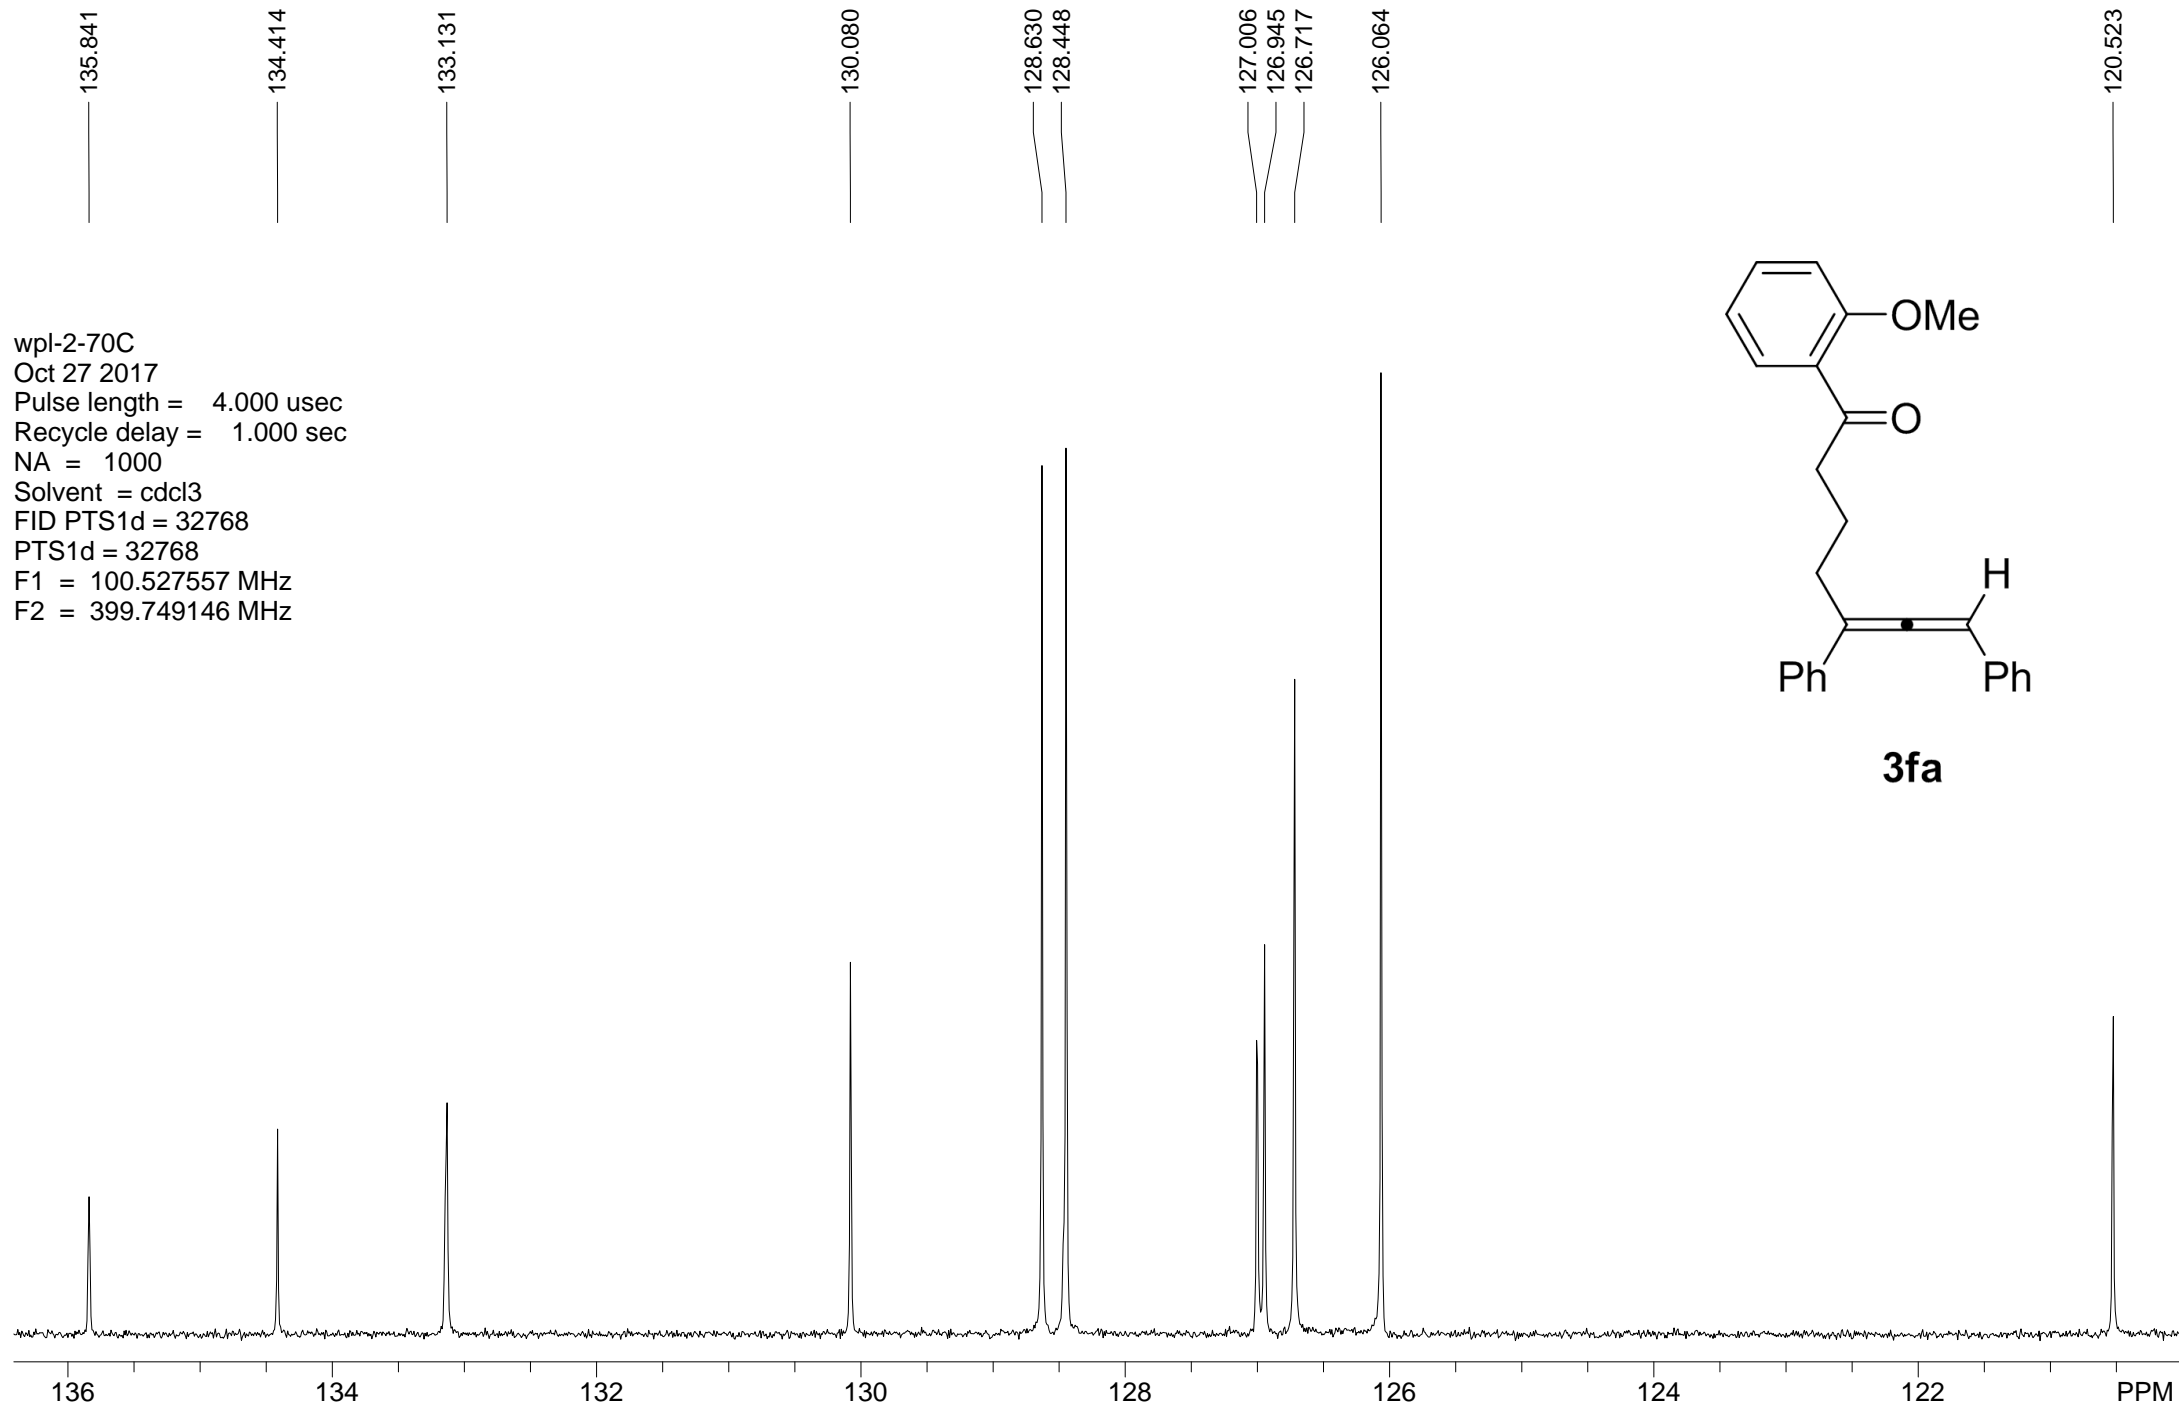

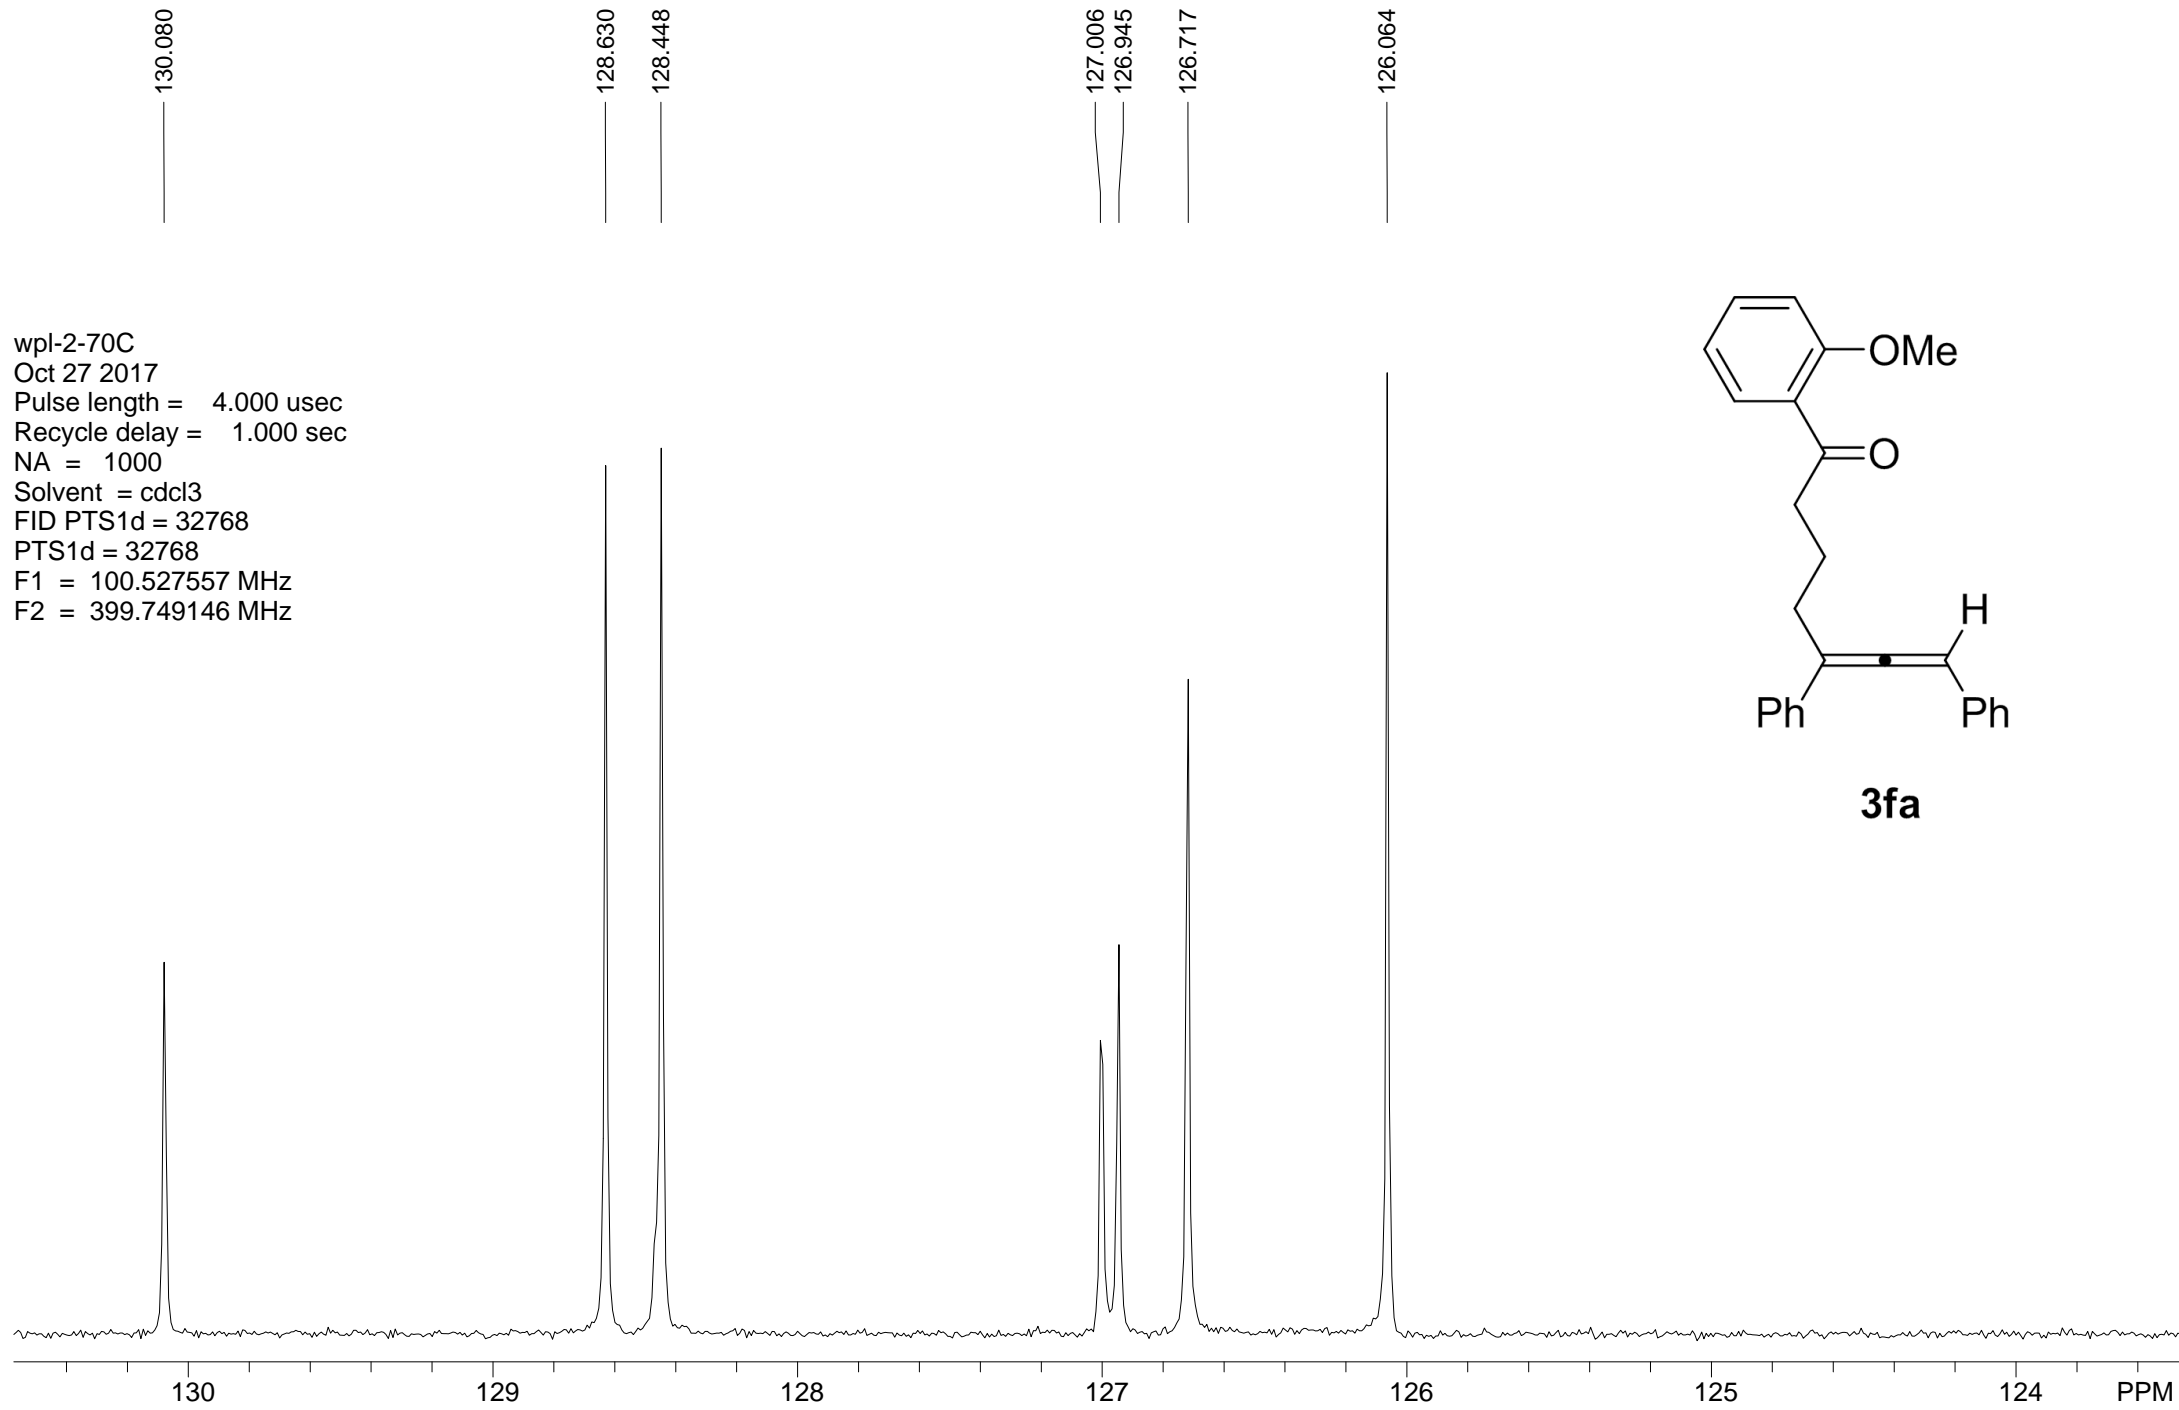

7.478  
7.459  
7.448  
7.443  
7.427  
7.423  
7.373  
7.369  
7.360  
7.356  
7.338  
7.321  
7.303  
7.283  
7.255  
7.242  
7.230  
7.225  
7.219  
7.213  
7.207  
7.198  
7.195  
6.772  
6.752  
6.573  
6.566  
6.558  
6.021  
3.004  
2.986  
2.968  
2.707  
2.700  
2.689  
2.681  
2.671  
2.663  
2.654  
2.646  
2.106  
2.089  
2.071  
2.065  
2.054  
2.047  
2.029  
1.581  
-0.000

wpl-2-82H  
Nov 2 2017  
Pulse length = 3.400 usec  
Recycle delay = 20.000 sec  
NA = 4  
Solvent = cdcl3  
FID PTS1d = 16384  
PTS1d = 16384  
F1 = 399.749542 MHz  
F2 = 100.526031 MHz

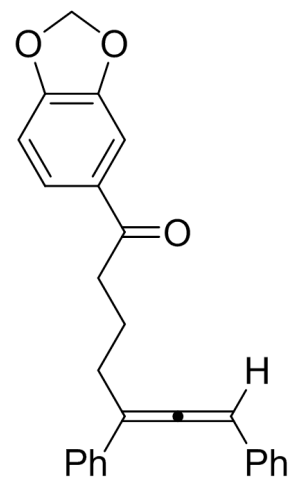

**3ga**

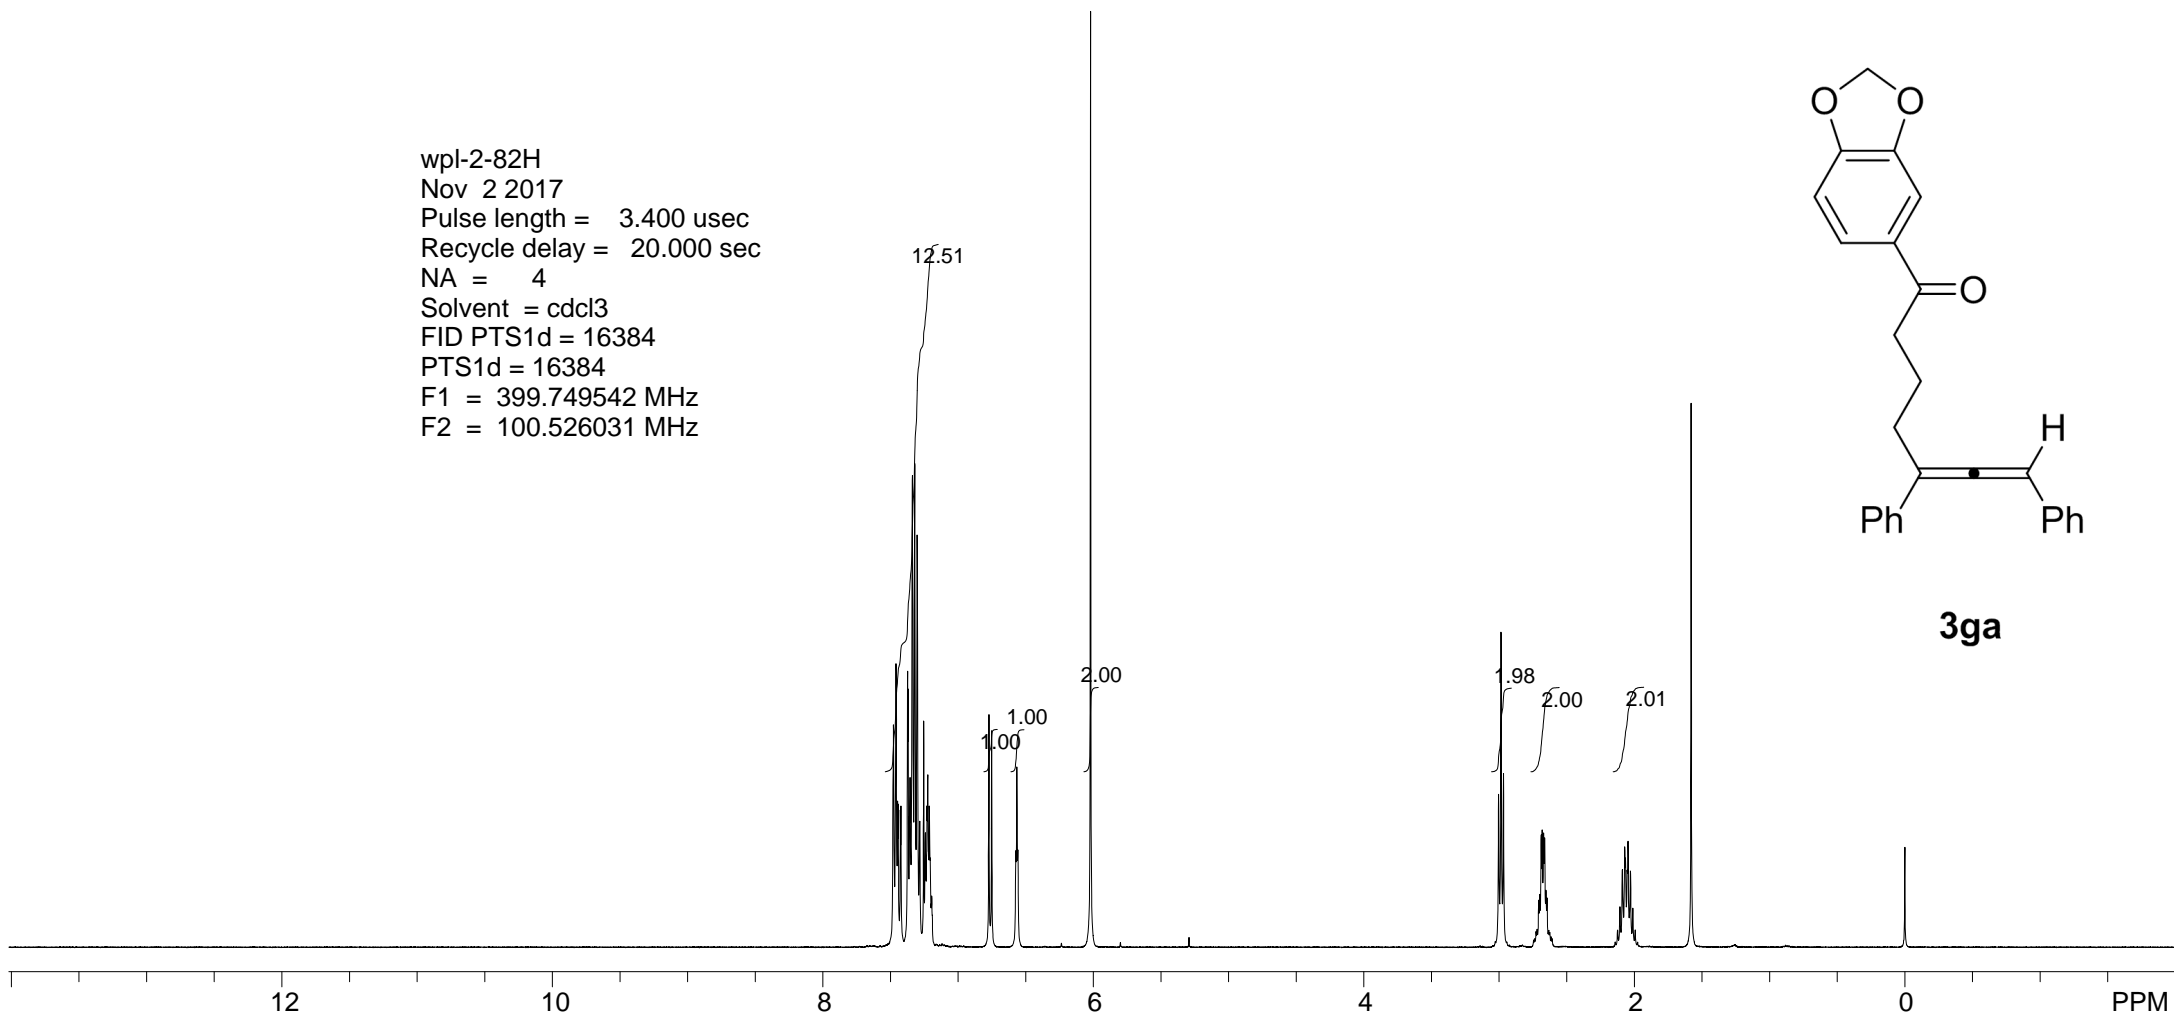



wpl-2-82C  
Nov 2 2017  
Pulse length = 4.000 usec  
Recycle delay = 1.000 sec  
NA = 1000  
Solvent = cdcl3  
FID PTS1d = 32768  
PTS1d = 32768  
F1 = 100.527557 MHz  
F2 = 399.749146 MHz

206.402  
197.984

151.515  
148.062  
135.735  
134.353  
131.818  
128.736  
128.516  
127.142  
127.104  
126.763  
126.057  
124.174  
109.282  
107.779  
107.718  
101.714  
98.238

77.319  
77.000  
76.681

37.727  
29.605  
22.432

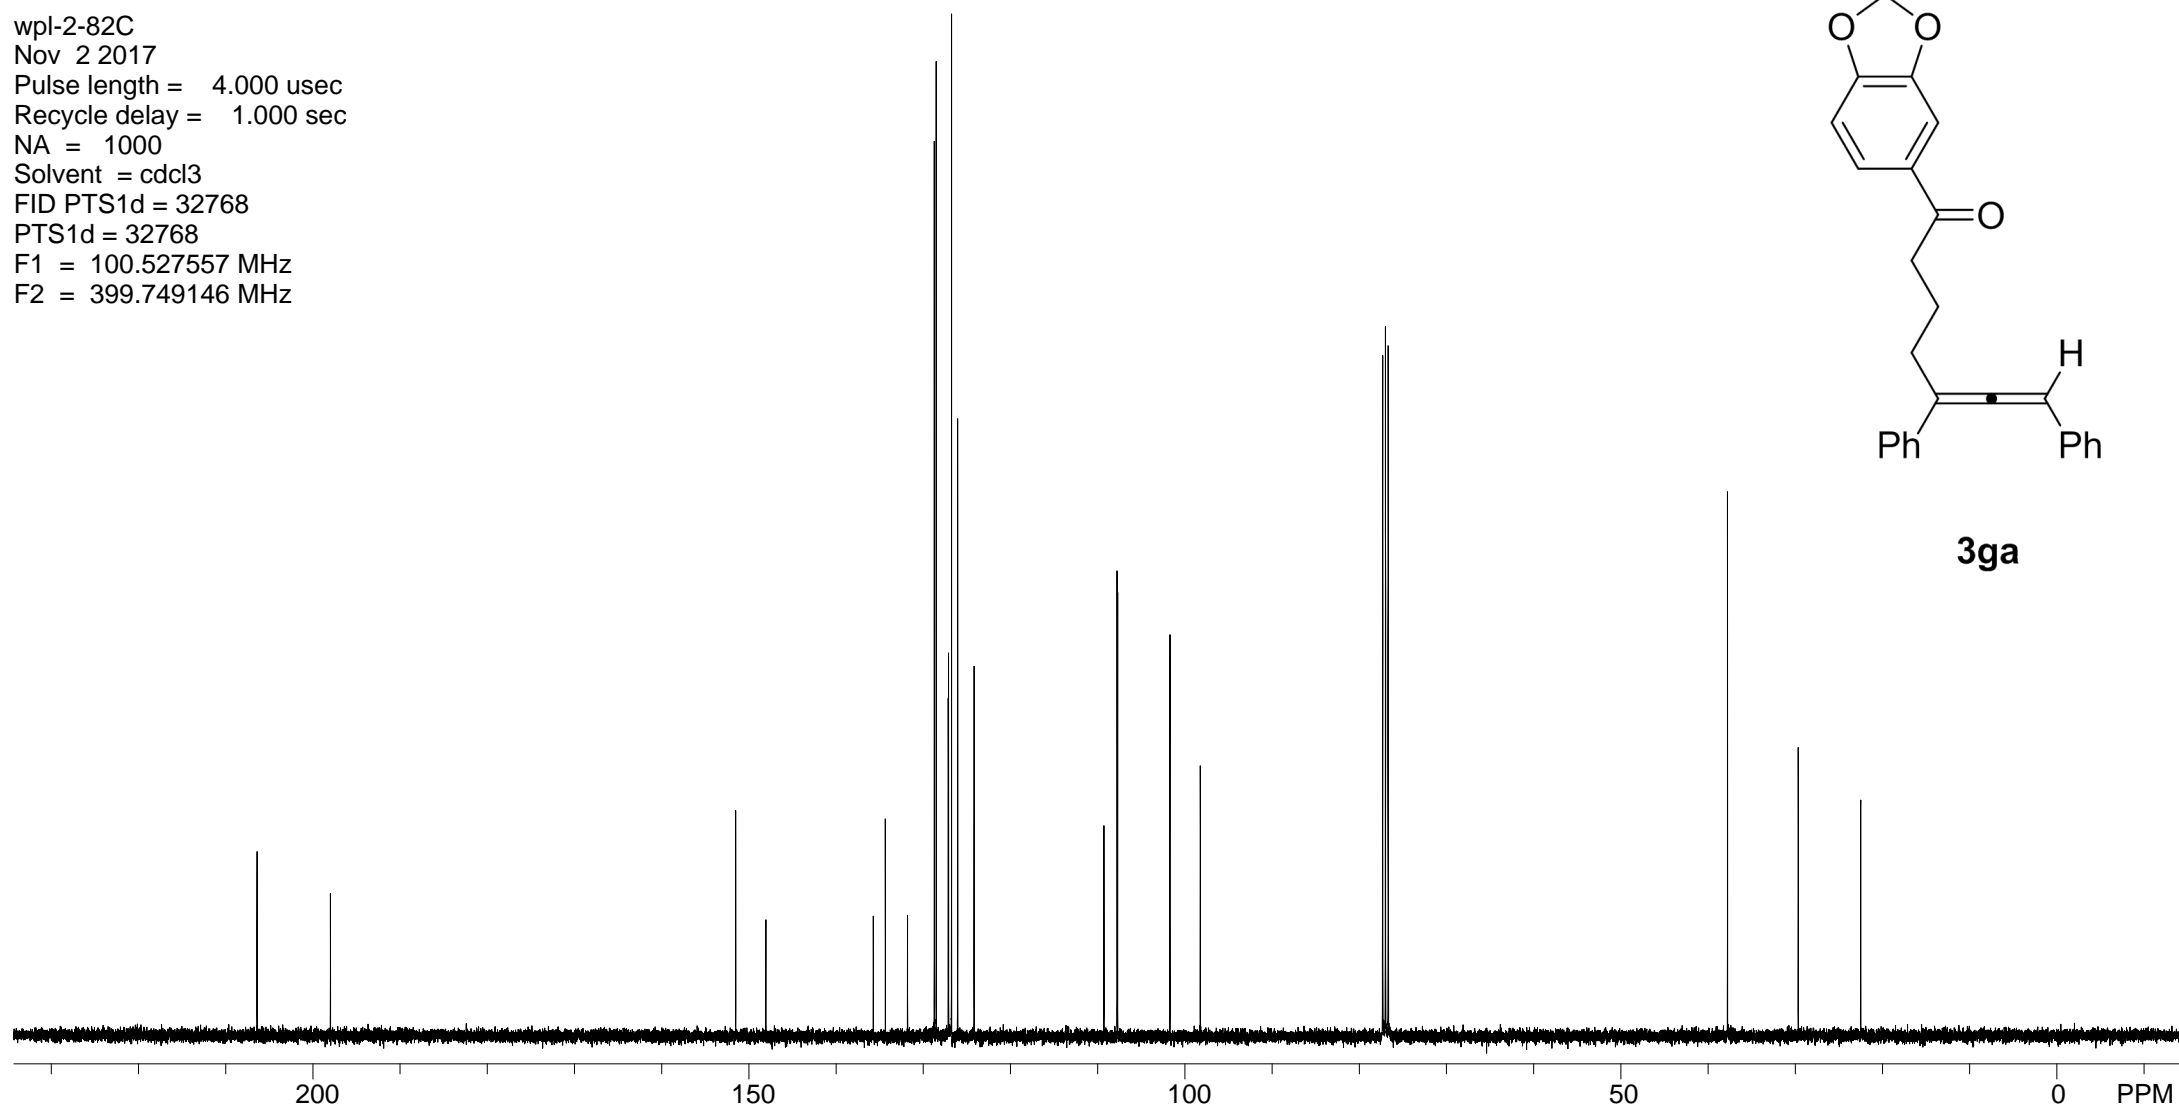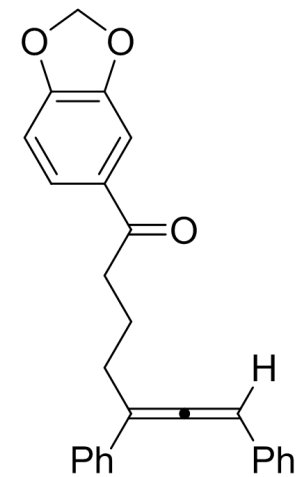

3ga

wpl-2-39H  
Sep 30 2017  
NA = 4  
Solvent = CDCl3  
PTS1d = 65536  
F1 = 400.130005 MHz  
F2 = 1.000000 MHz

7.460  
7.440  
7.325  
7.308  
7.300  
7.289  
7.253  
7.238  
7.221  
7.213  
6.553

2.594  
2.576  
2.561  
2.518  
2.500  
2.482  
2.319  
2.300  
2.281  
1.931  
1.912  
1.894  
1.876  
1.589  
1.503  
1.485  
1.466  
1.447  
1.275  
1.256  
1.238  
1.219  
0.881  
0.863  
0.844  
-0.000

8.66

2.09

1.00

2.04

2.0496

2.05

2.07

2.12

5.17

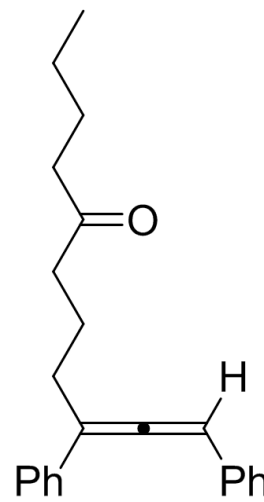

3ha

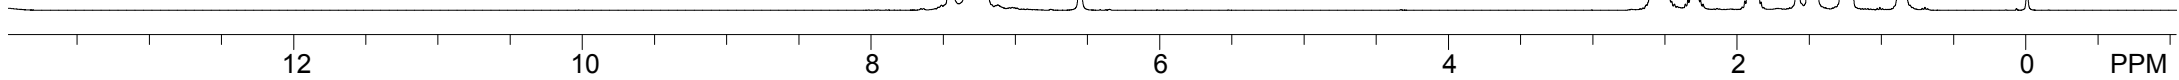

wpl-2-39C  
Oct 2 2017  
Pulse length = 4.950 usec  
Recycle delay = 1.000 sec  
NA = 64  
Solvent = cdcl3  
FID PTS1d = 32768  
PTS1d = 32768  
F1 = 100.520737 MHz  
F2 = 399.722015 MHz

210.988  
206.289

135.693  
134.274  
128.656  
128.459  
127.077  
127.047  
126.683  
125.977

109.231

98.186

77.326  
77.000  
76.689

42.446  
41.975

29.367  
25.829  
22.231  
21.852

13.752

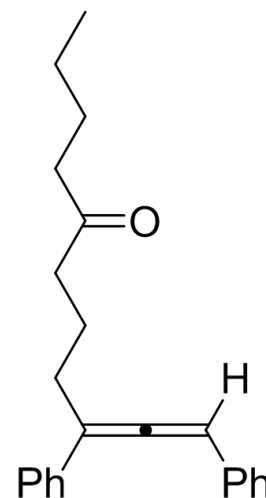

3ha

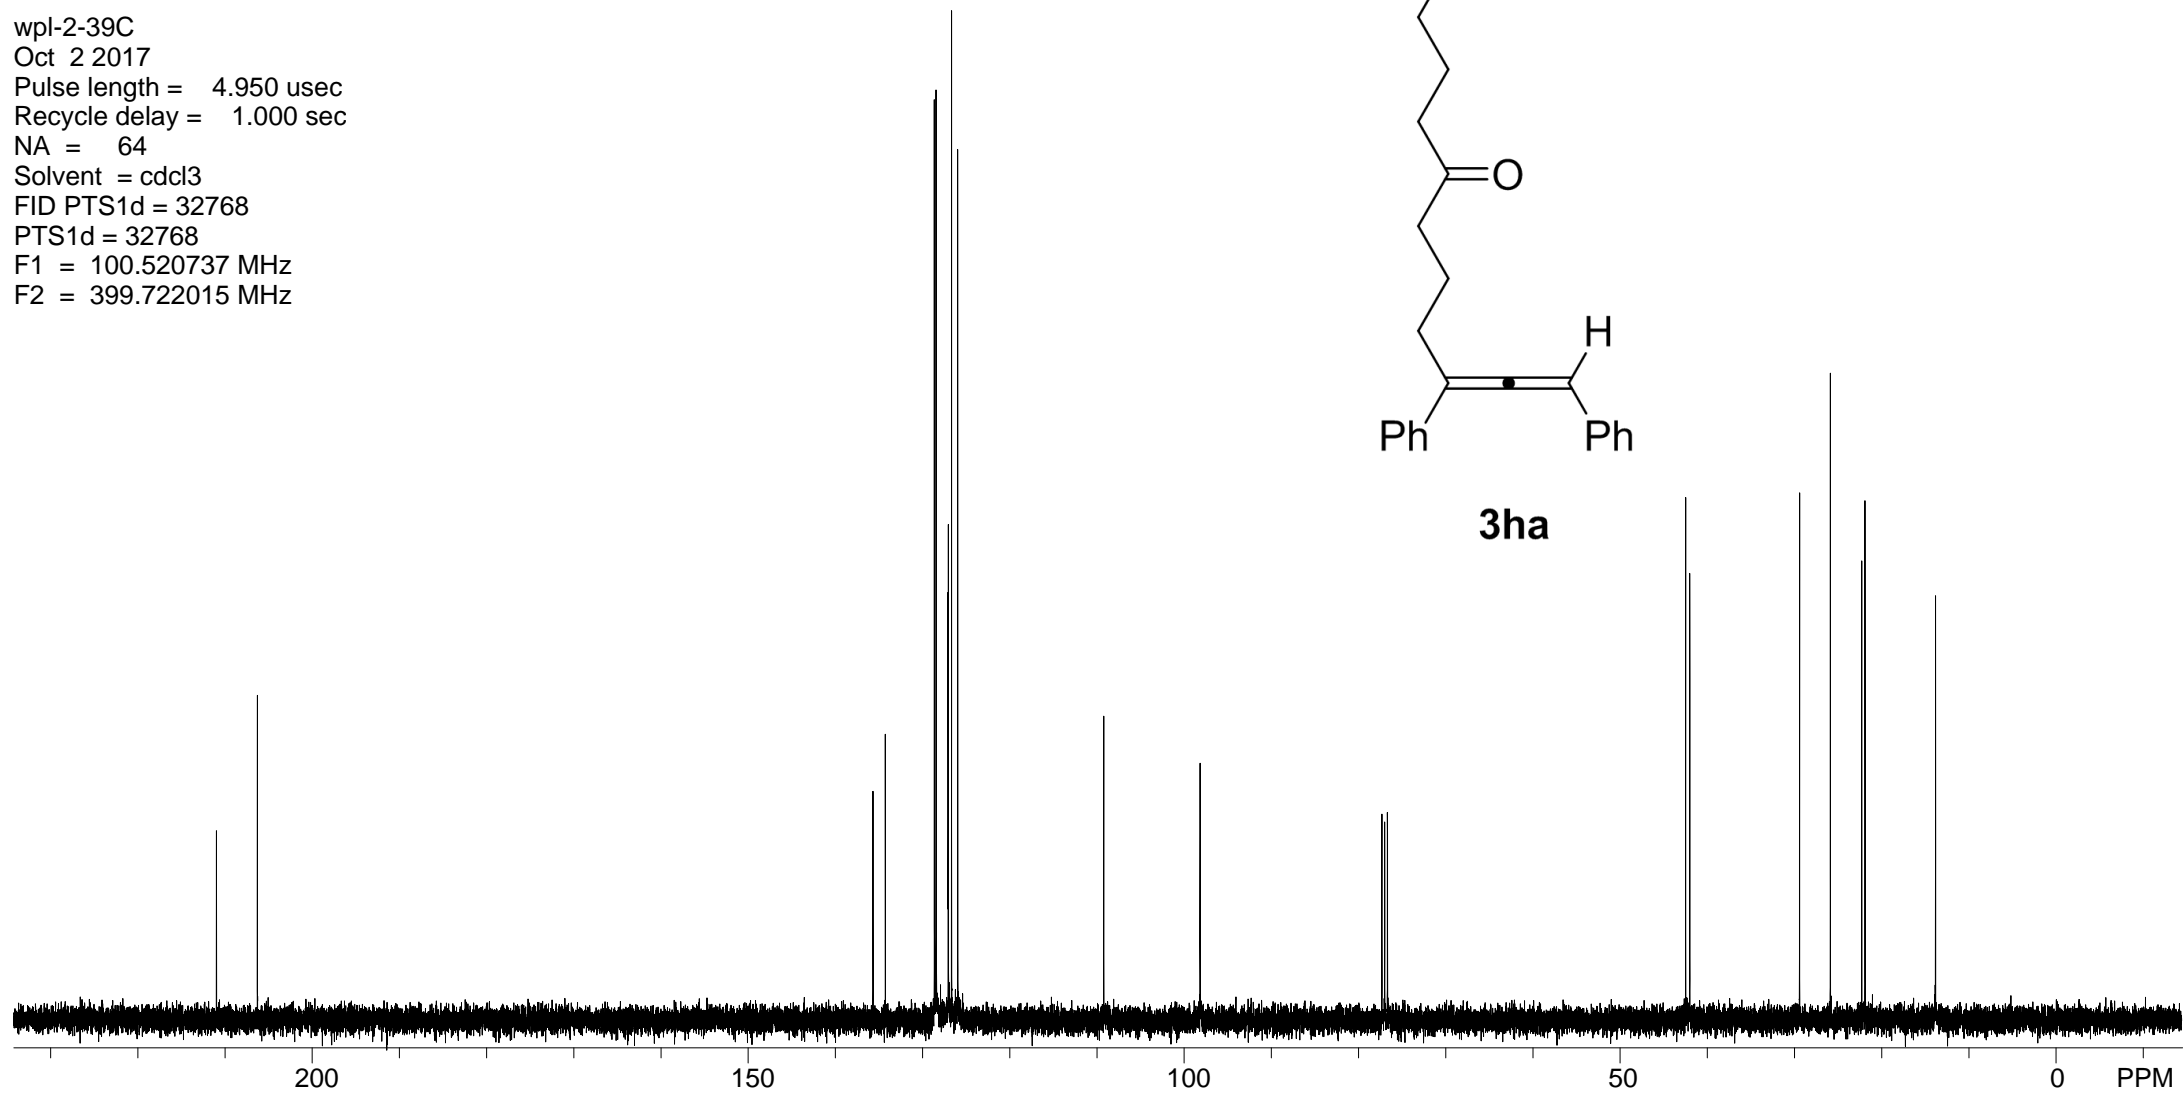

wpl-2-48H  
Oct 6 2017  
Pulse length = 4.450 usec  
Recycle delay = 20.000 sec  
NA = 4  
Solvent = cdcl3  
FID PTS1d = 16384  
PTS1d = 16384  
F1 = 399.722809 MHz  
F2 = 100.519203 MHz

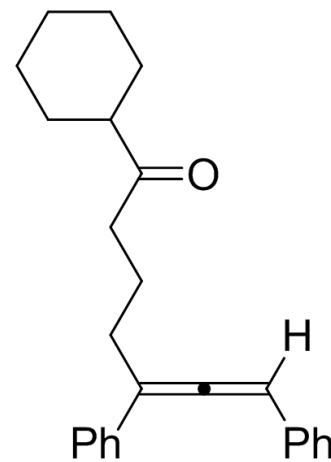

**3ia**

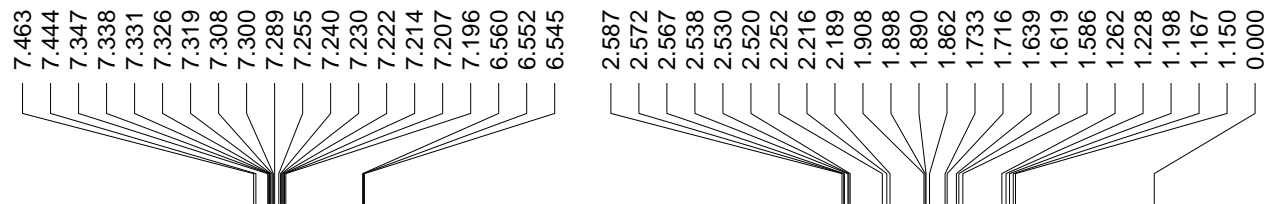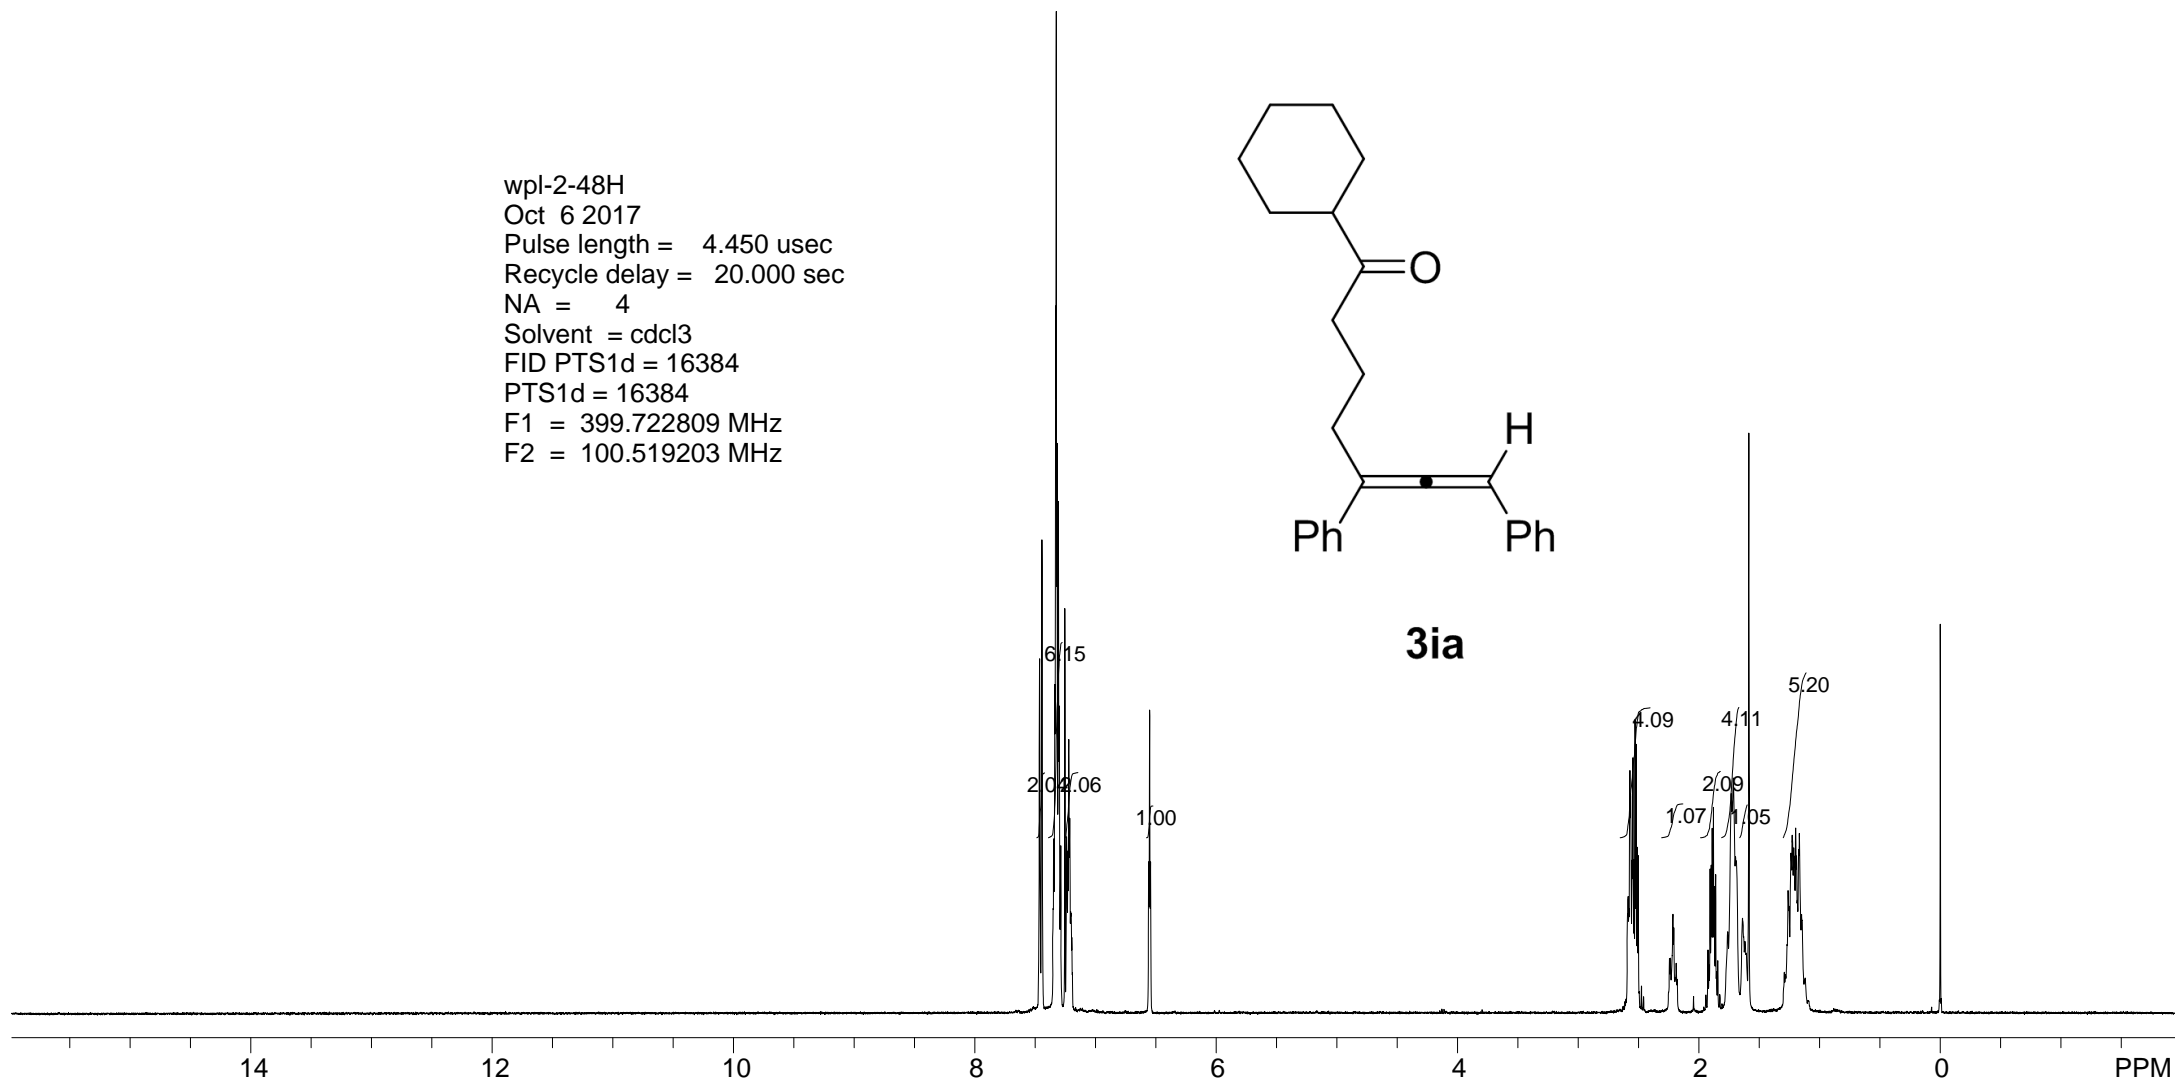

wpl-2-48C  
Oct 9 2017  
Pulse length = 10.000 usec  
Recycle delay = 1.000 sec  
NA = 512  
Solvent = CDCl3  
PTS1d = 32768  
F1 = 100.605225 MHz  
F2 = 1.000000 MHz

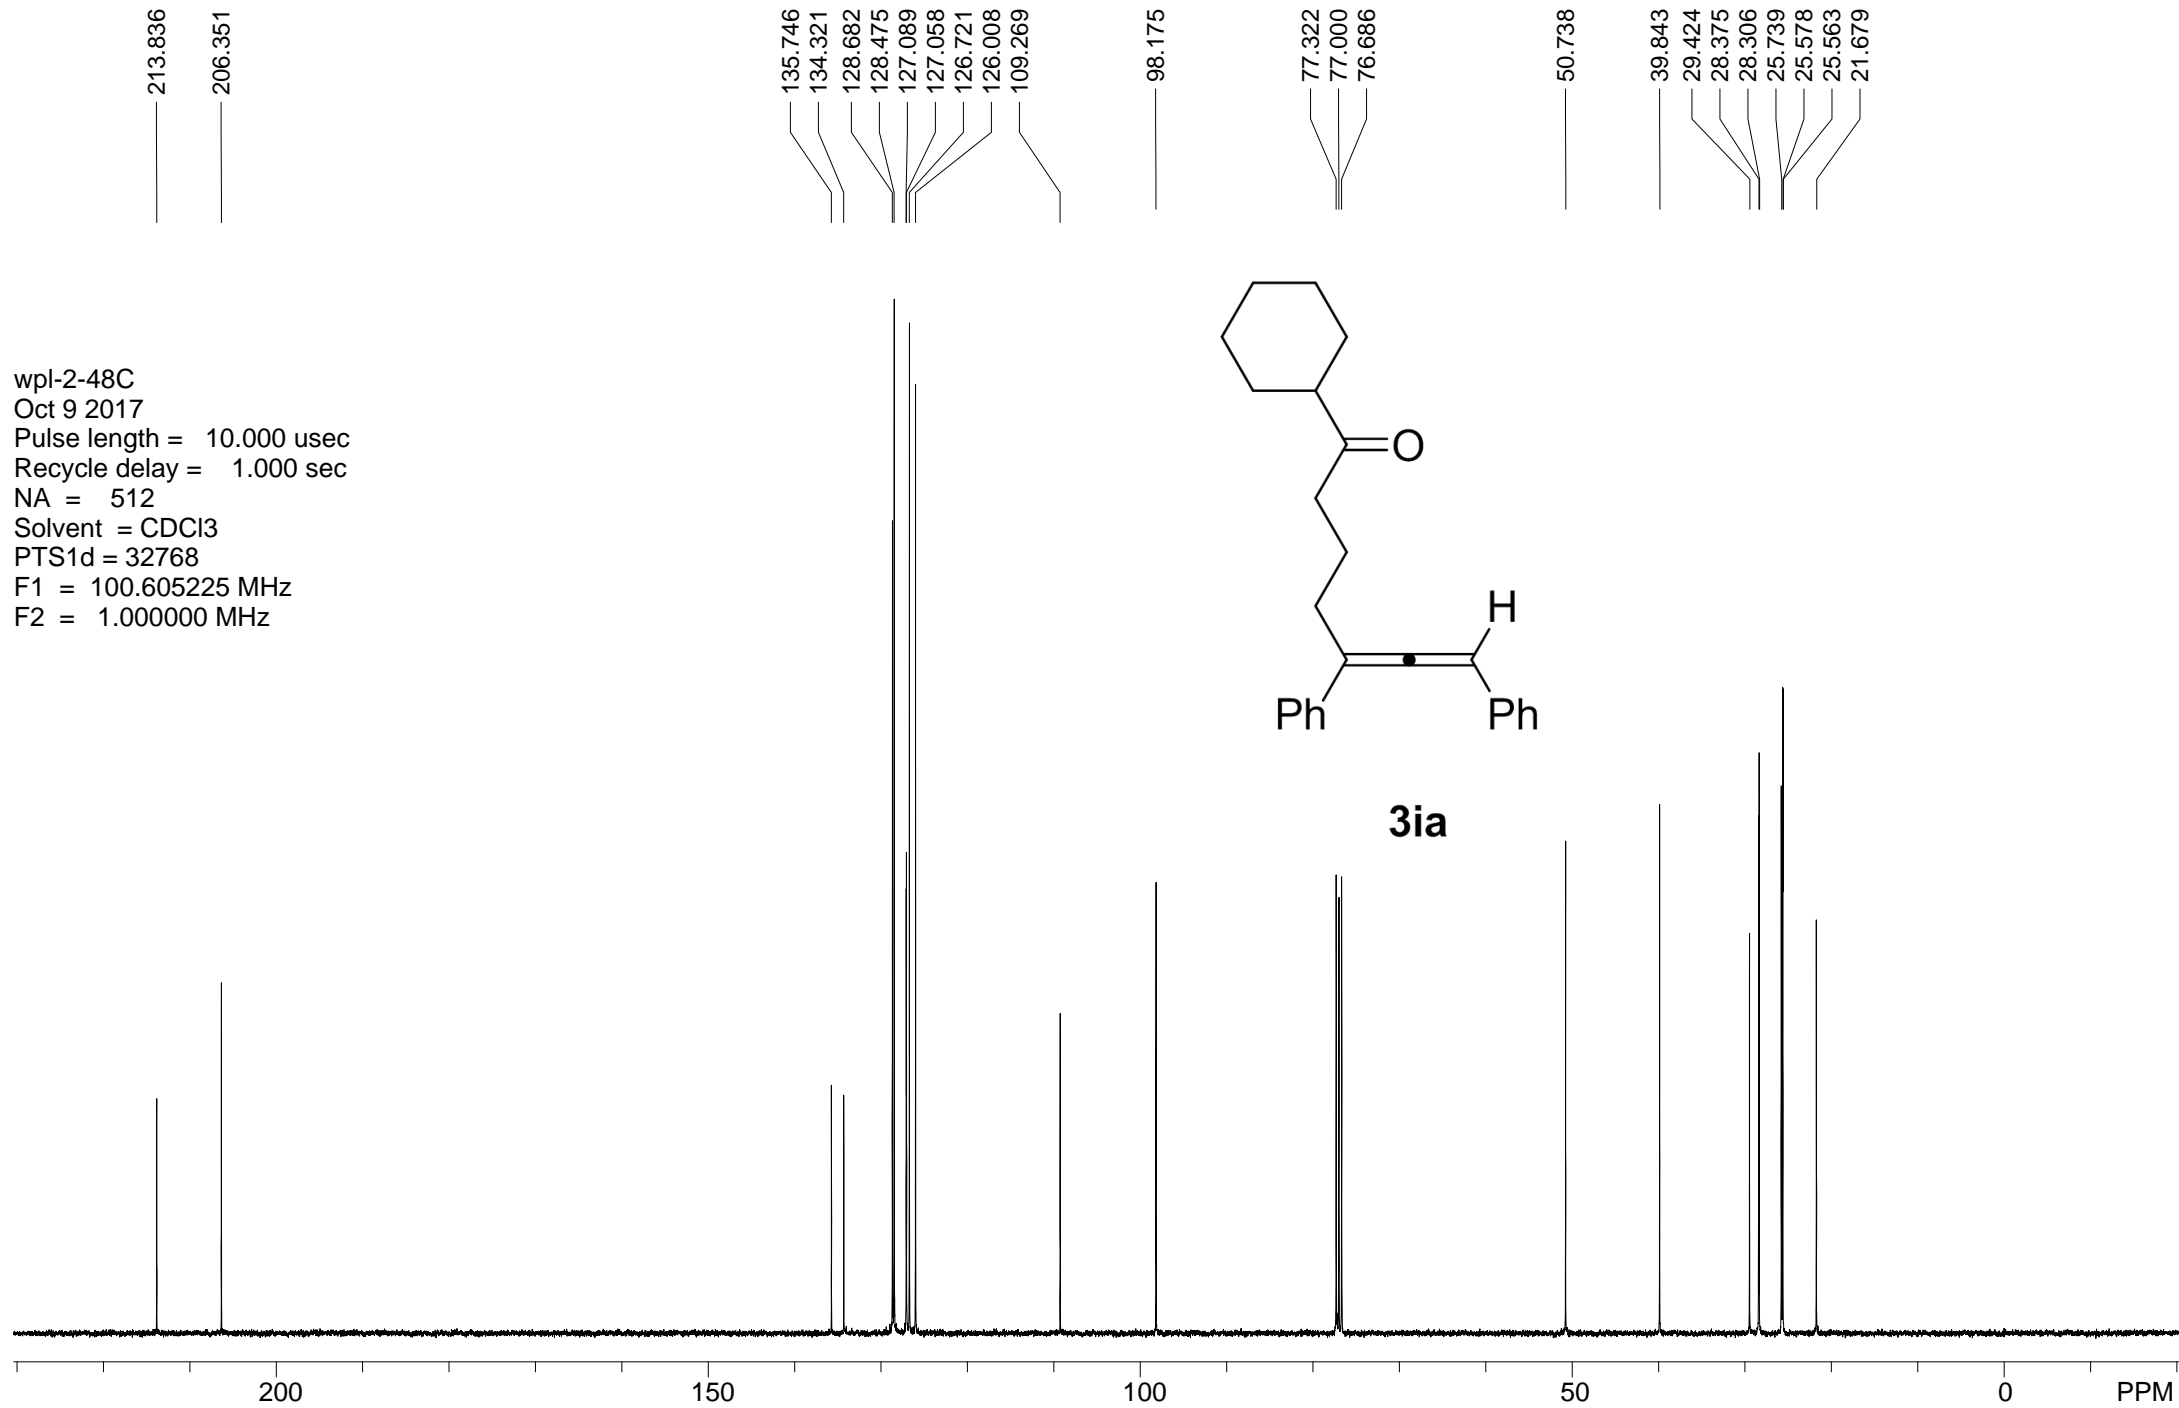

wpl-2-72H  
Oct 24 2017  
Pulse length = 3.400 usec  
Recycle delay = 10.000 sec  
NA = 4  
Solvent = cdcl3  
FID PTS1d = 16384  
PTS1d = 16384  
F1 = 399.749542 MHz  
F2 = 100.526031 MHz

7.420 7.402 7.316 7.305 7.287 7.284 7.270 7.252 7.248 7.245 7.235 7.229 7.227 7.215 7.205 7.193 7.133 7.116 6.510 6.502 6.495 3.588 2.566 2.549 2.530 2.521 2.517 2.505 2.502 2.498 1.893 1.888 1.875 1.870 1.857 1.852 1.545 0.000

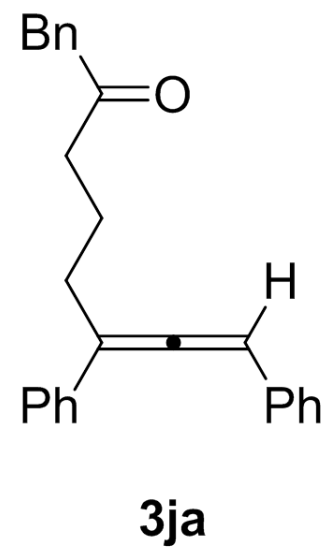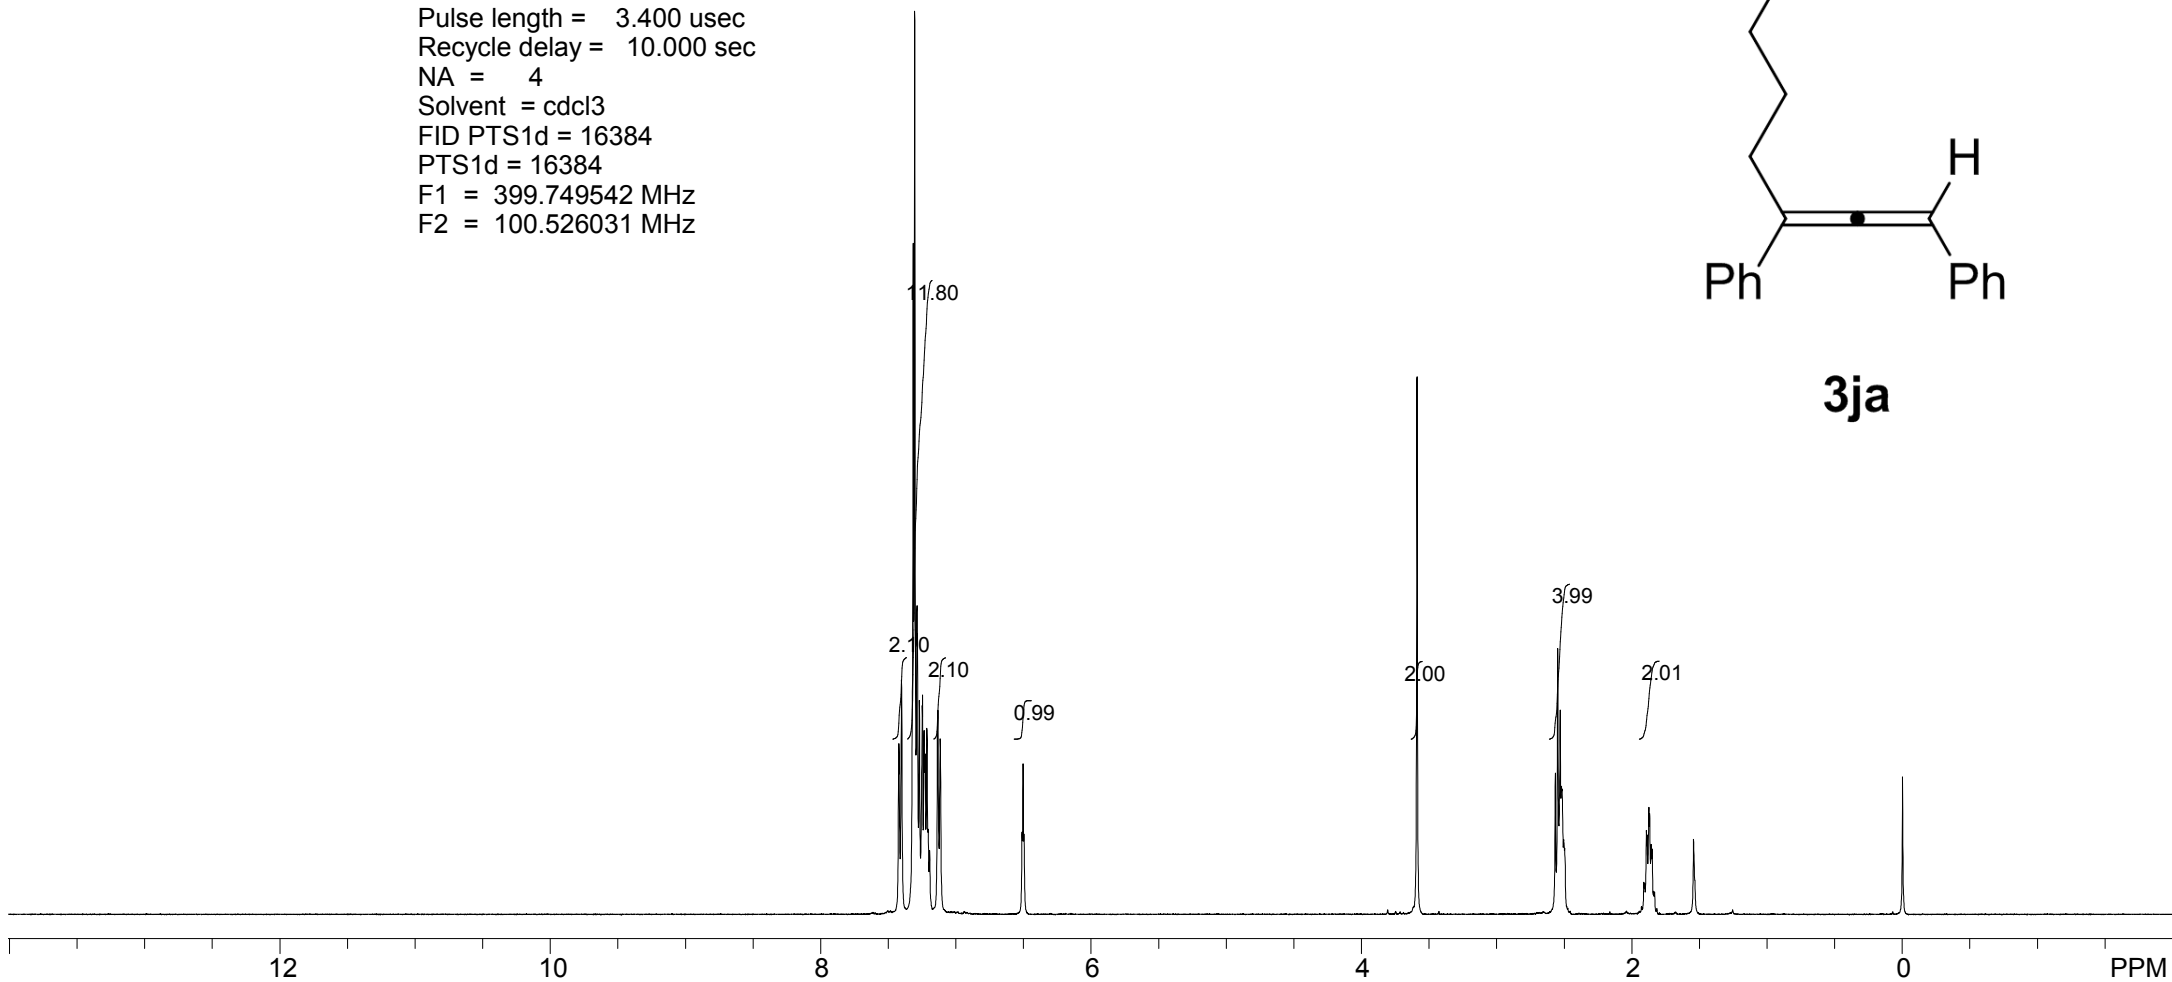

wpl-2-72C  
Oct 24 2017  
Pulse length = 4.000 usec  
Recycle delay = 1.000 sec  
NA = 512  
Solvent = cdcl3  
FID PTS1d = 32768  
PTS1d = 32768  
F1 = 100.527557 MHz  
F2 = 399.749146 MHz

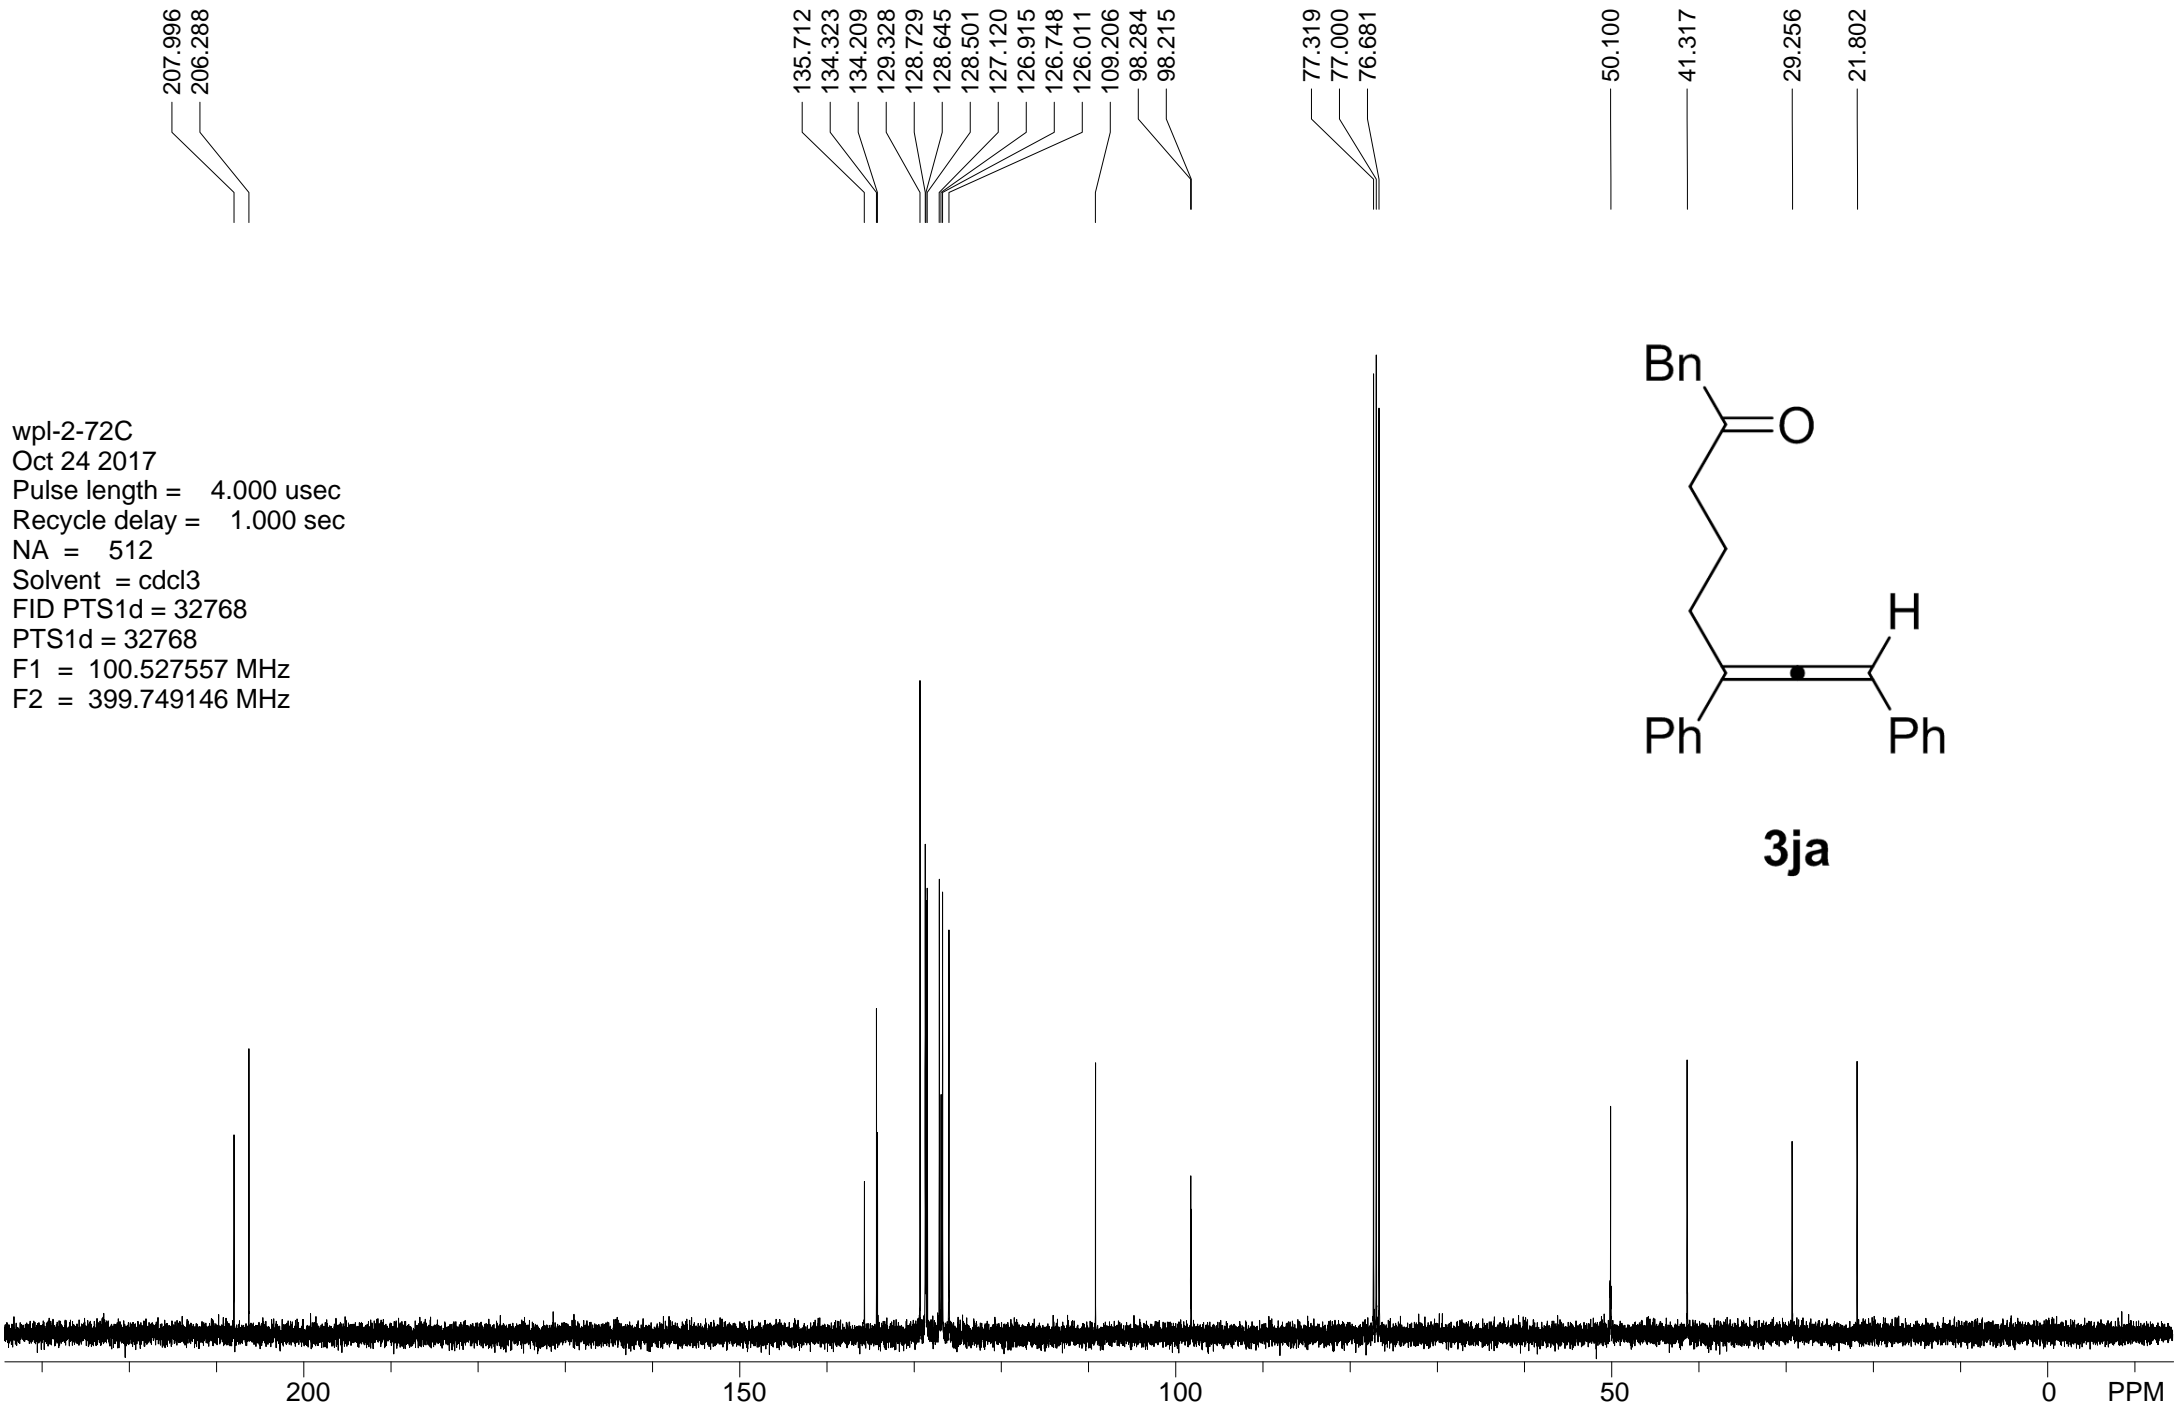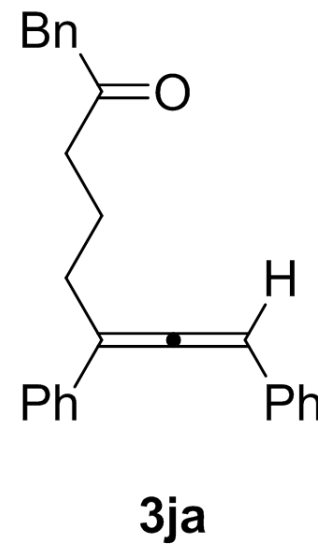

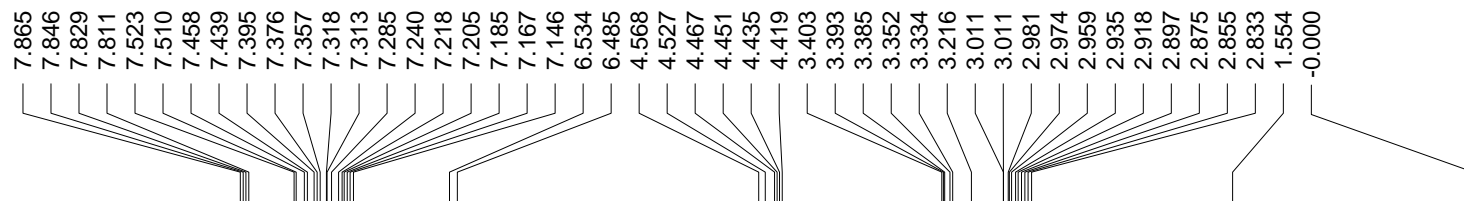

wpl-4-194H  
 Pulse length = 10.000 usec  
 Recycle delay = 20.000 sec  
 NA = 4  
 Solvent = CDCl3  
 PTS1d = 65536  
 F1 = 400.130005 MHz  
 F2 = 1.000000 MHz

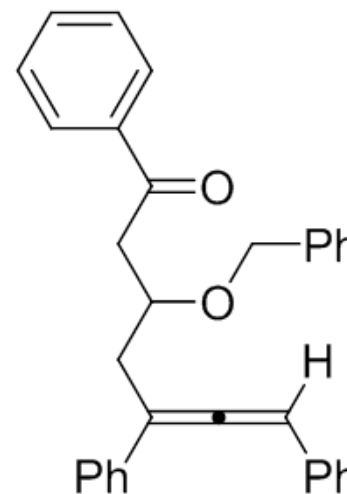

**3ka**

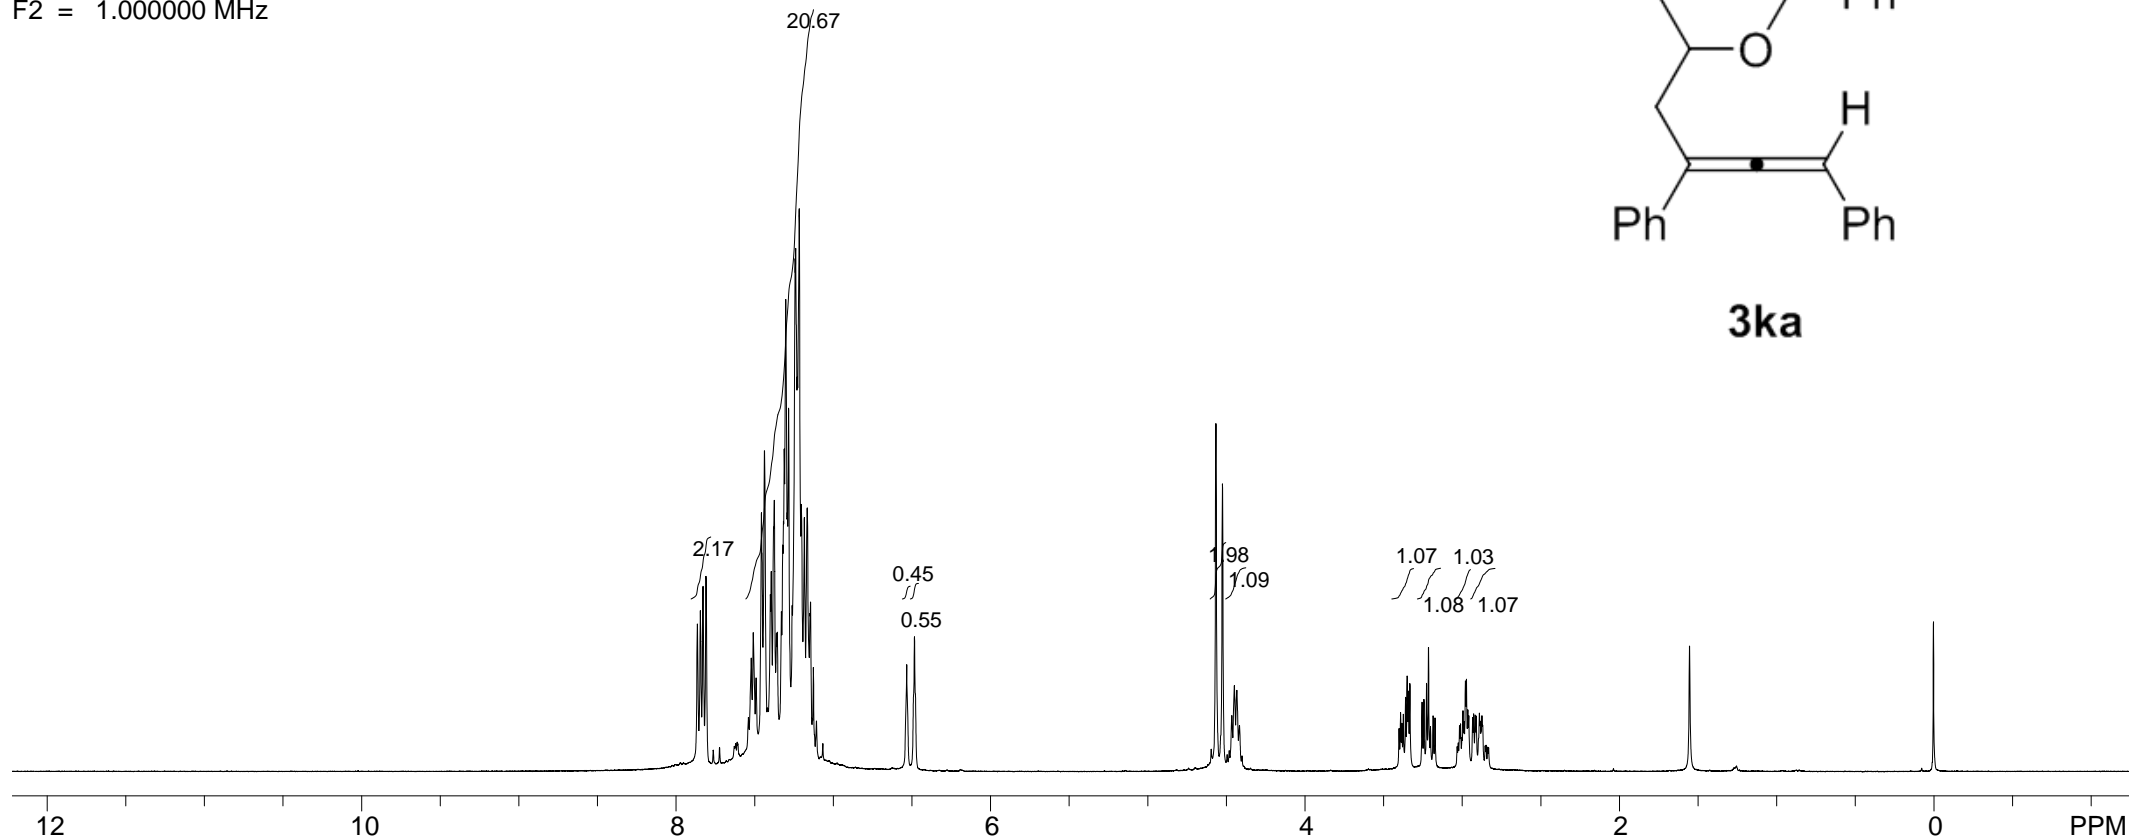



wpl-4-194H  
Pulse length = 10.000 usec  
Recycle delay = 20.000 sec  
NA = 4  
Solvent = CDCl3  
PTS1d = 65536  
F1 = 400.130005 MHz  
F2 = 1.000000 MHz

6.534  
6.485

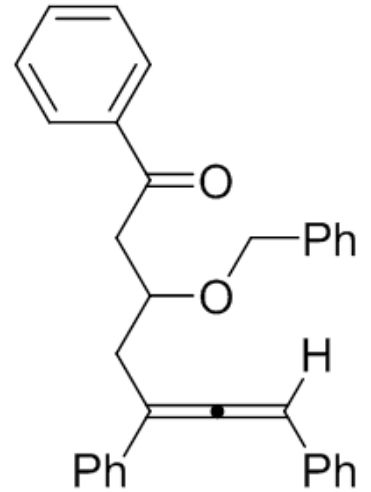

3ka

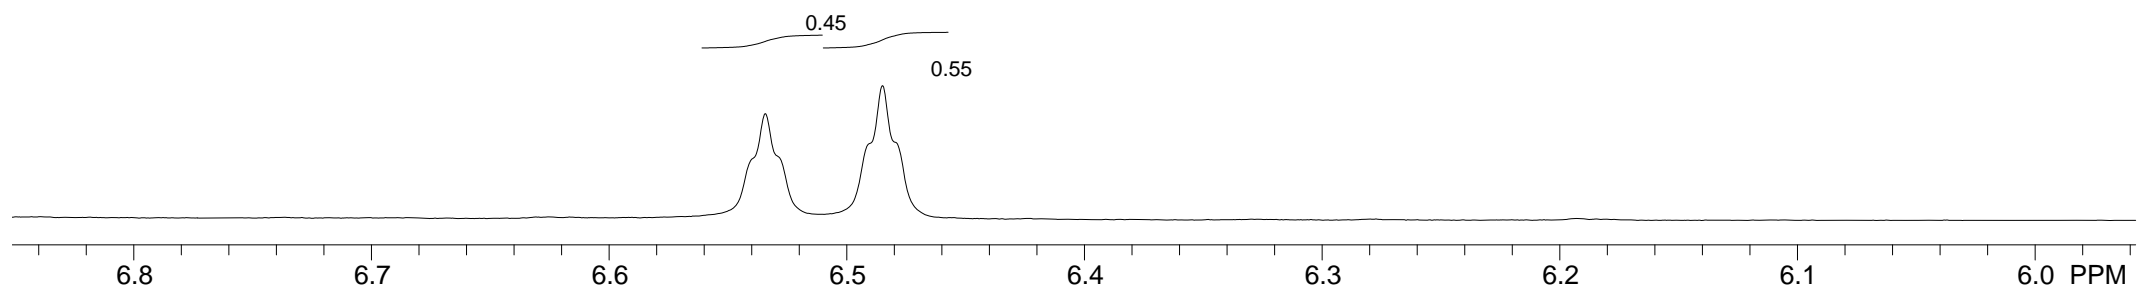

wpl-4-194Purity  
Pulse length = 10.000 usec  
Recycle delay = 20.000 sec  
NA = 4  
Solvent = CDCl3  
PTS1d = 65536  
F1 = 400.130005 MHz  
F2 = 1.000000 MHz

Purity was determined to be 97% by using 17.5  $\mu$  L dibromomethane as the internal standard in 33.1 mg sample

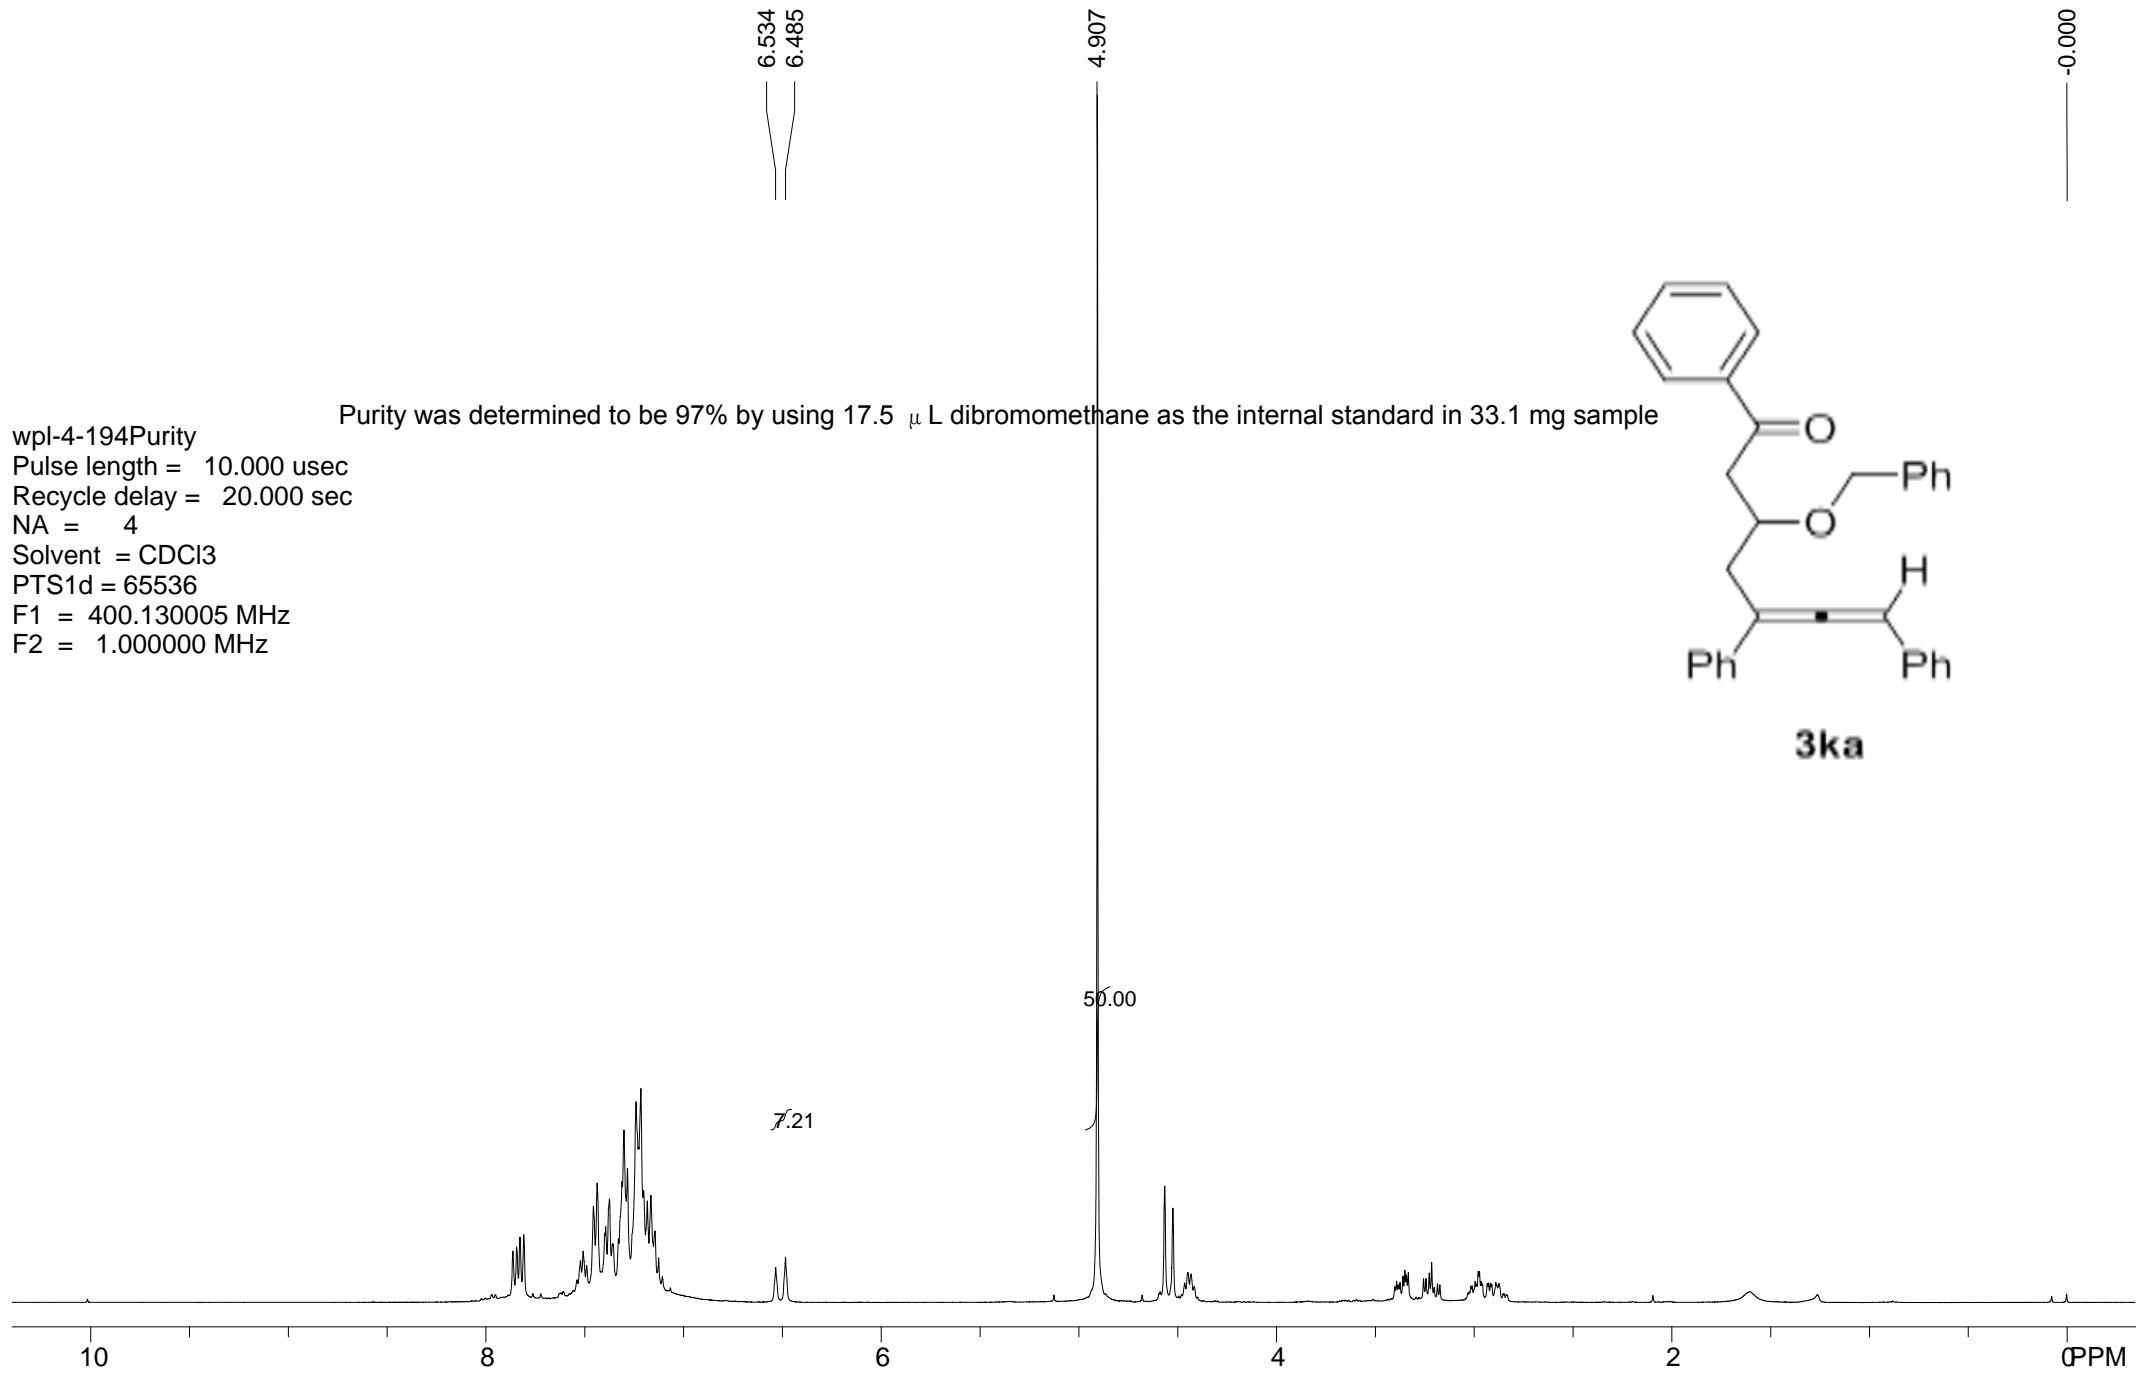

7.417  
7.402  
7.395  
7.342  
7.324  
7.321  
7.318  
7.308  
7.297  
7.277  
7.272  
7.237  
7.231  
7.227  
7.219  
7.200  
7.196  
6.974  
6.959  
6.488  
3.730  
3.430

0.000

wpl-2-159H  
Jan 20 2018  
Pulse length = 3.400 usec  
Recycle delay = 20.000 sec  
NA = 4  
Solvent = cdcl3  
FID PTS1d = 16384  
PTS1d = 16384  
F1 = 399.749542 MHz  
F2 = 100.526031 MHz

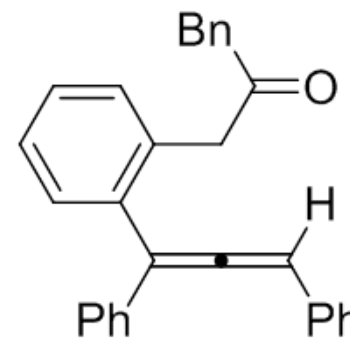

3la

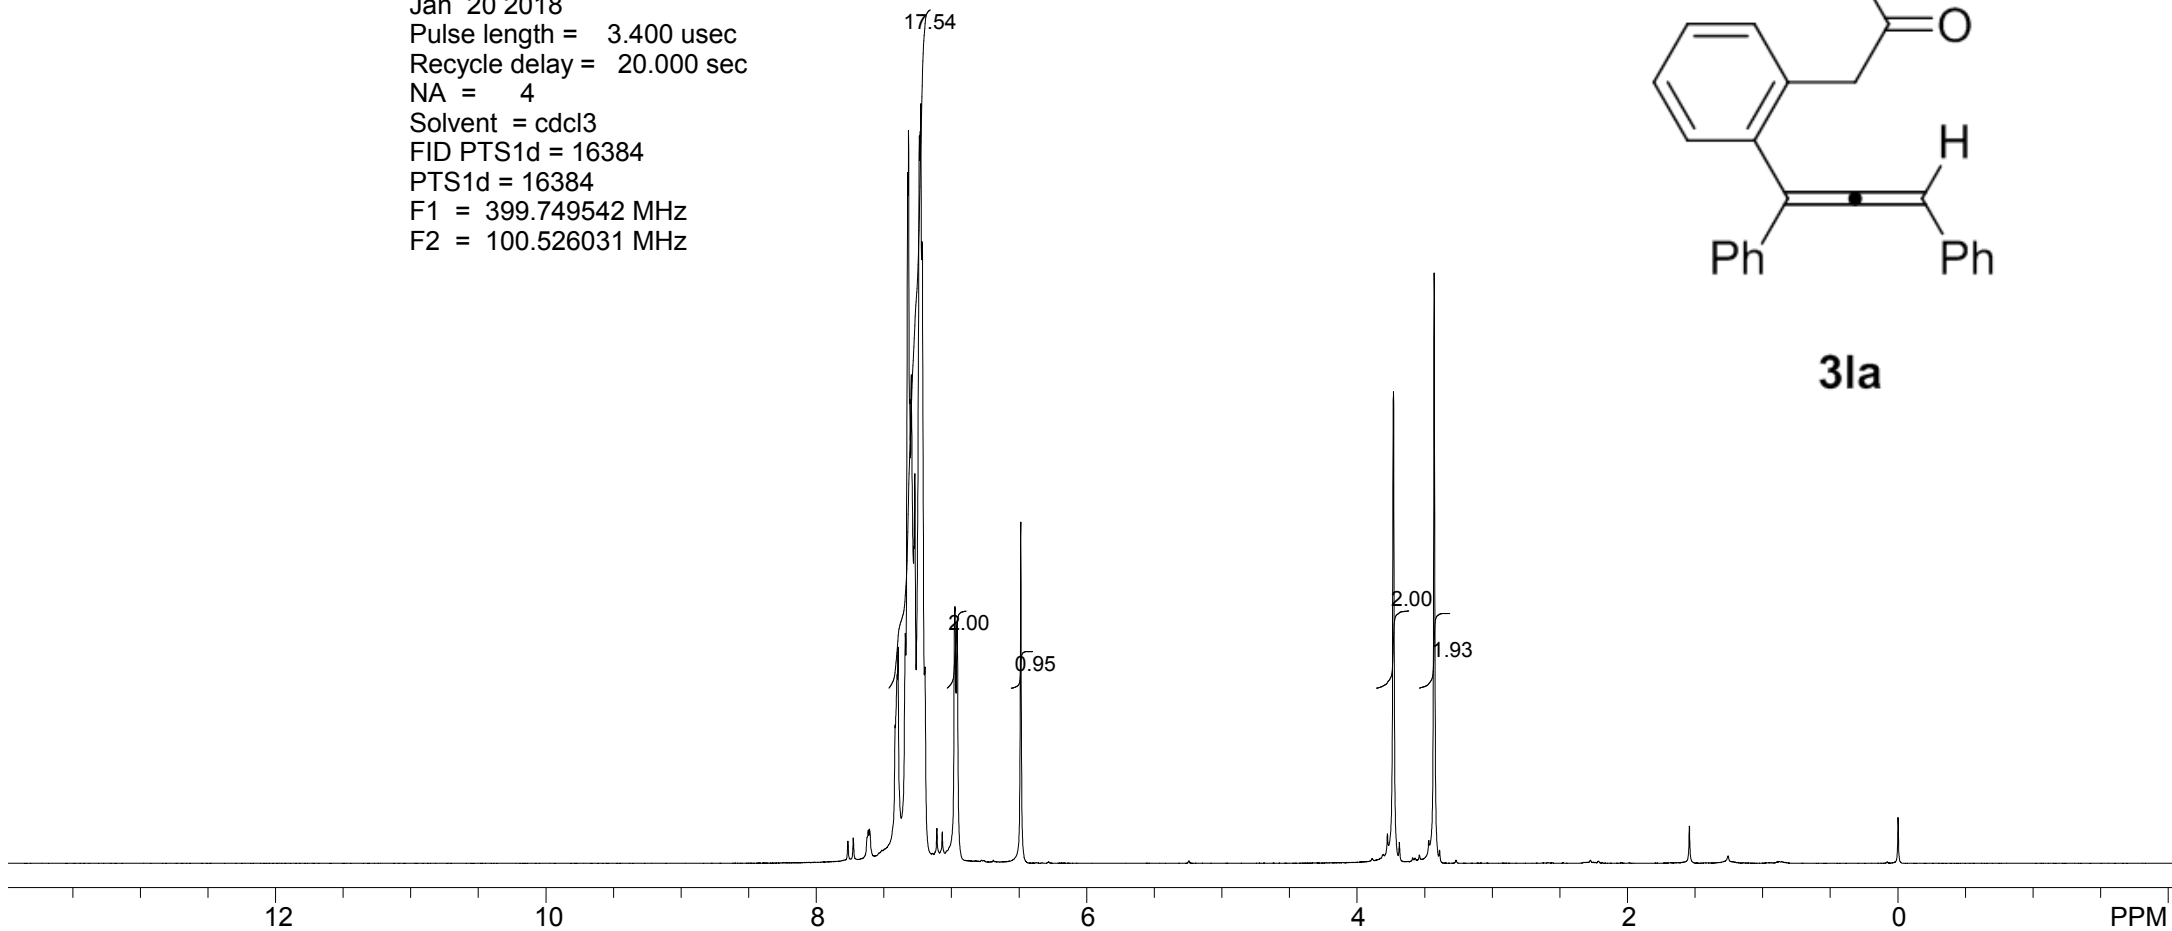

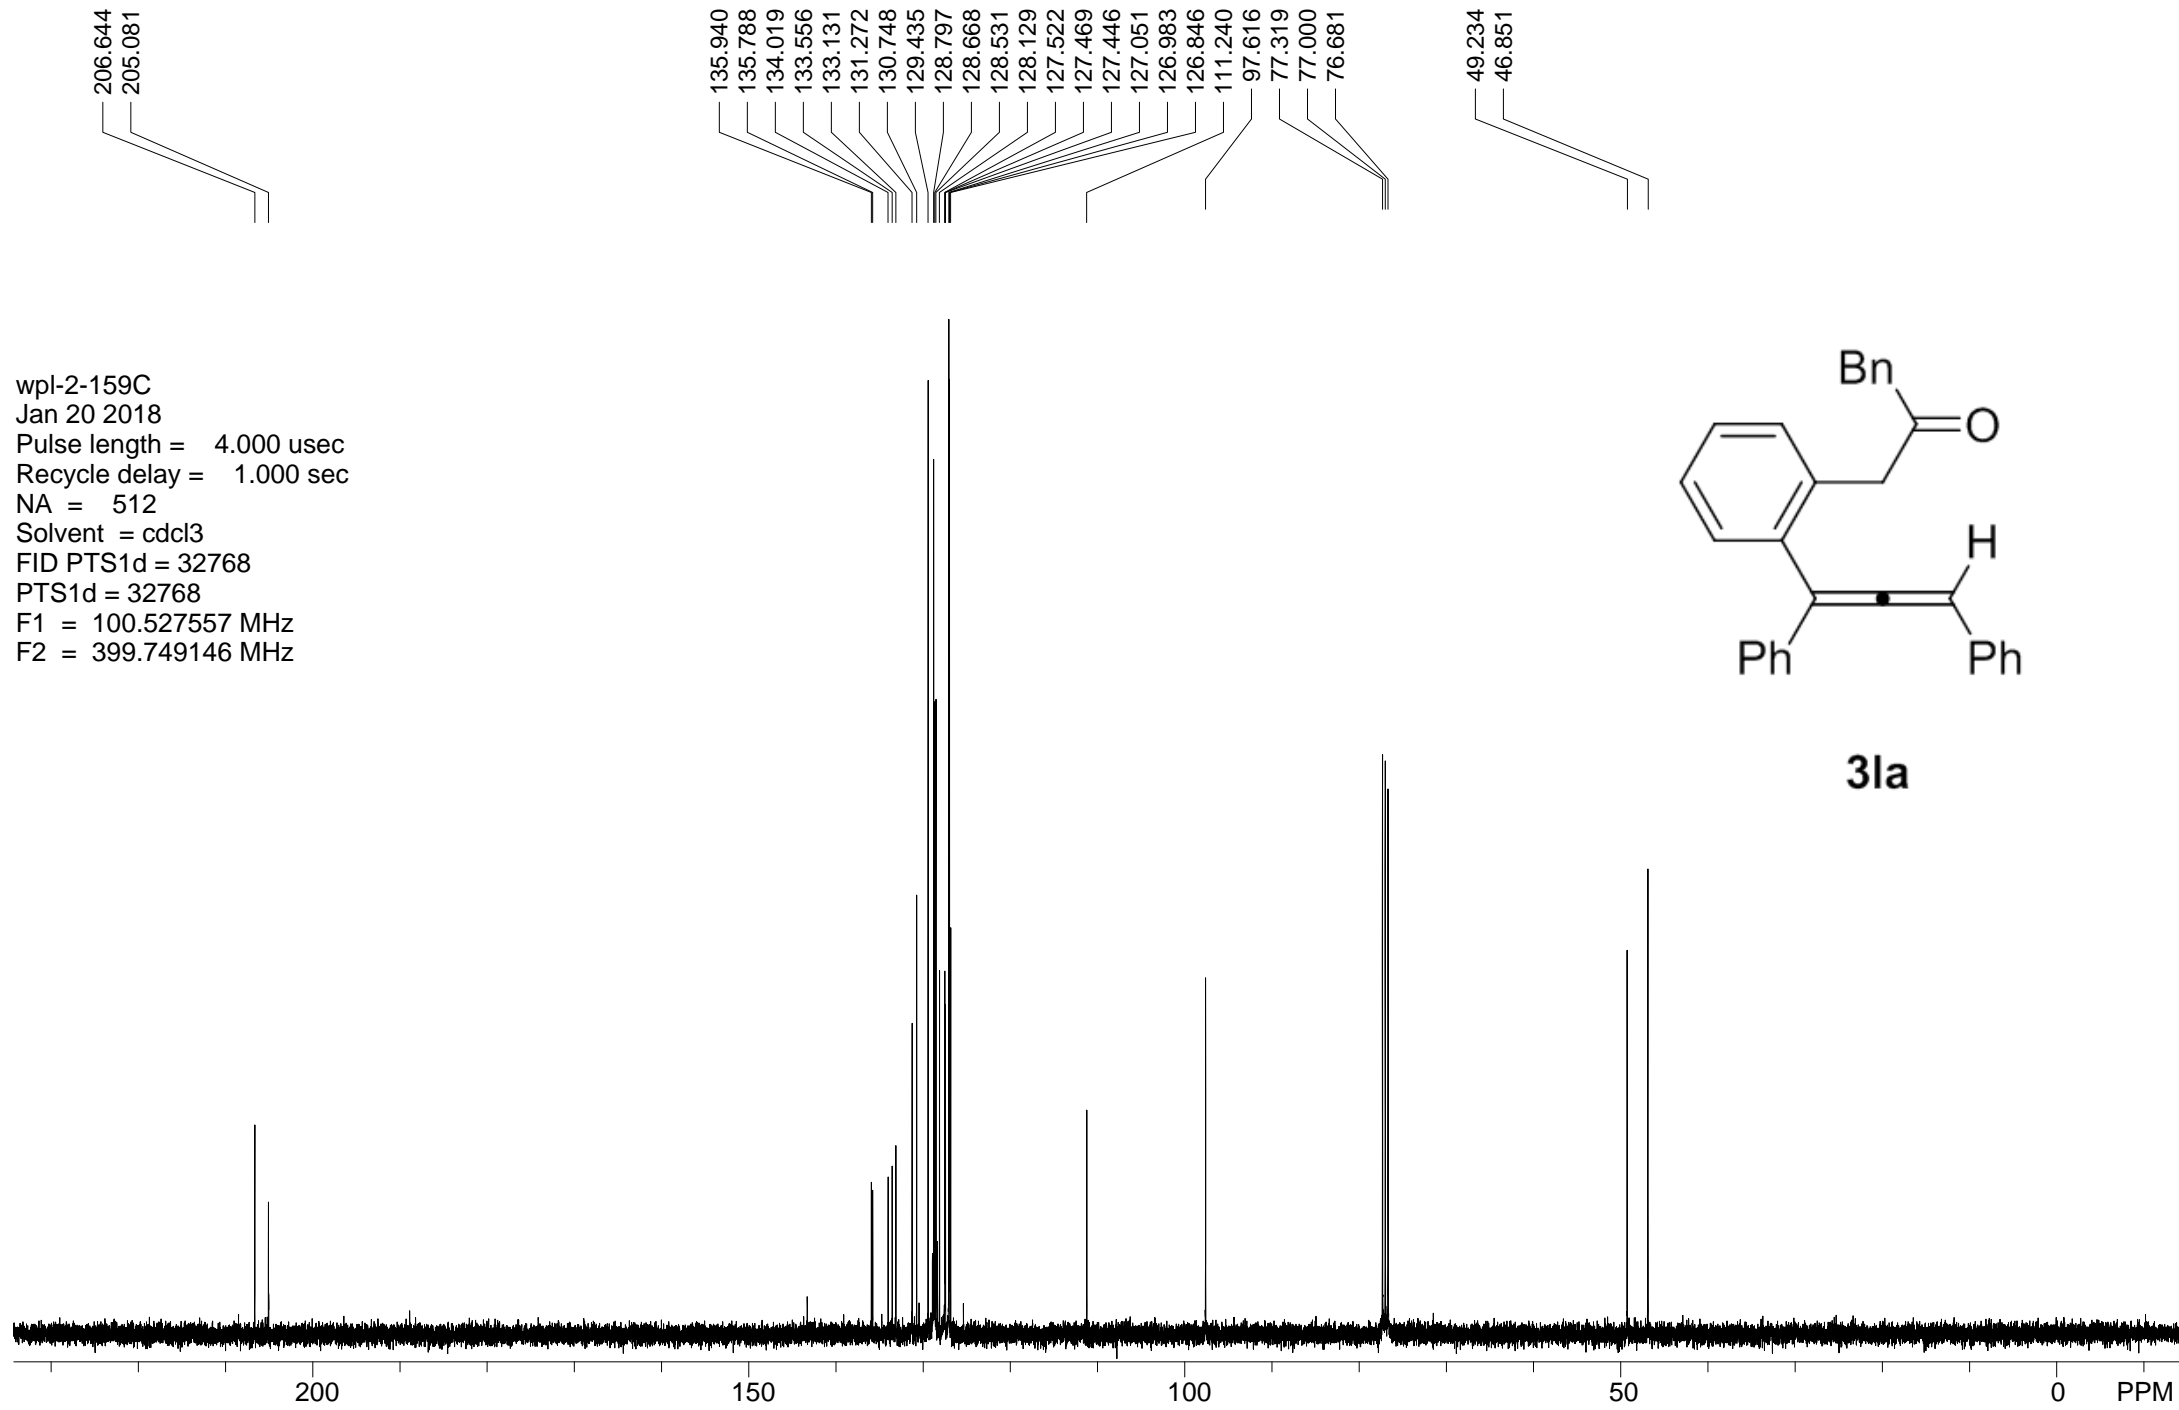

6.492

4.918

-0.000

Purity was determined to be 97% by using 7.0  $\mu$ L dibromomethane as the internal standard in 16.1 mg sample

wpl-2-159Purity  
Feb 3 2018  
Pulse length = 3.400 usec  
Recycle delay = 20.000 sec  
NA = 4  
Solvent = cdcl3  
FID PTS1d = 16384  
PTS1d = 16384  
F1 = 399.749542 MHz  
F2 = 100.526031 MHz

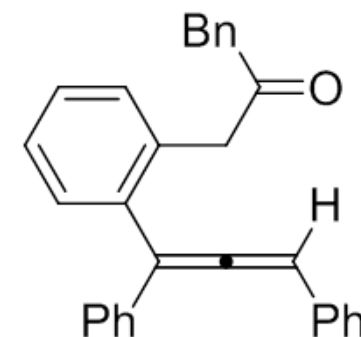**3la**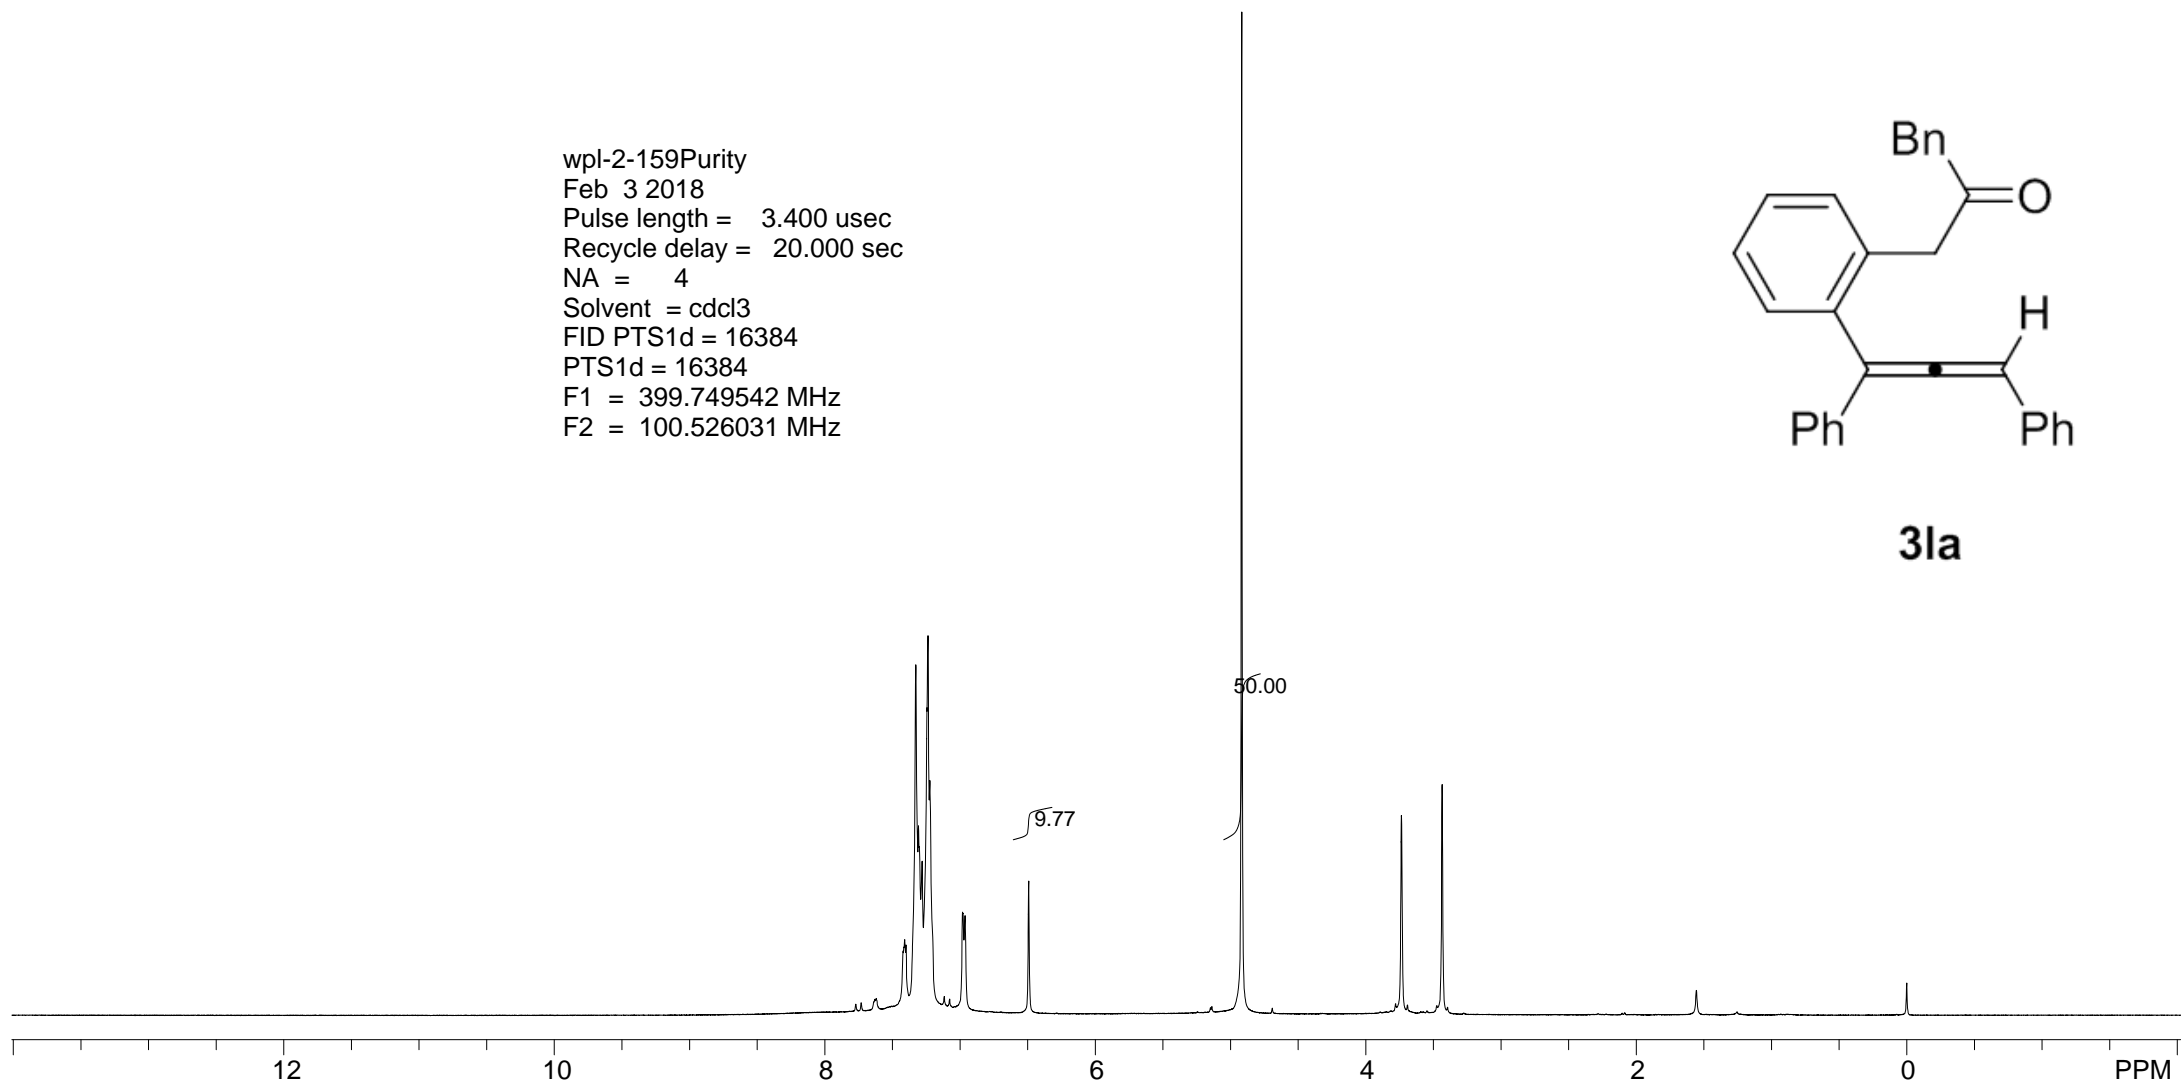

7.918  
7.896  
7.884  
7.866  
7.564  
7.544  
7.531  
7.512  
7.426  
7.407  
7.388  
7.346  
7.329  
7.325  
7.308  
7.288  
7.251  
7.246  
7.235  
7.229  
7.229  
7.208  
6.629  
6.622  
6.615  
3.099  
3.081  
3.064  
2.736  
2.728  
2.717  
2.709  
2.699  
2.692  
2.681  
2.674  
2.575  
2.139  
2.120  
2.101  
2.083  
2.063  
2.046  
1.683  
-0.000

wpl-2-93H  
Nov 11 2017  
Pulse length = 3.400 usec  
Recycle delay = 20.000 sec  
NA = 4  
Solvent = cdcl3  
FID PTS1d = 16384  
PTS1d = 16384  
F1 = 399.749542 MHz  
F2 = 100.526031 MHz

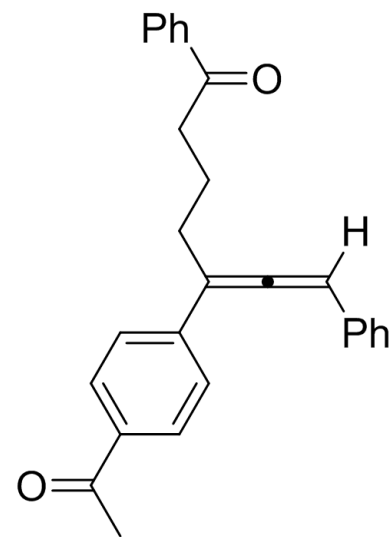

**3ab**

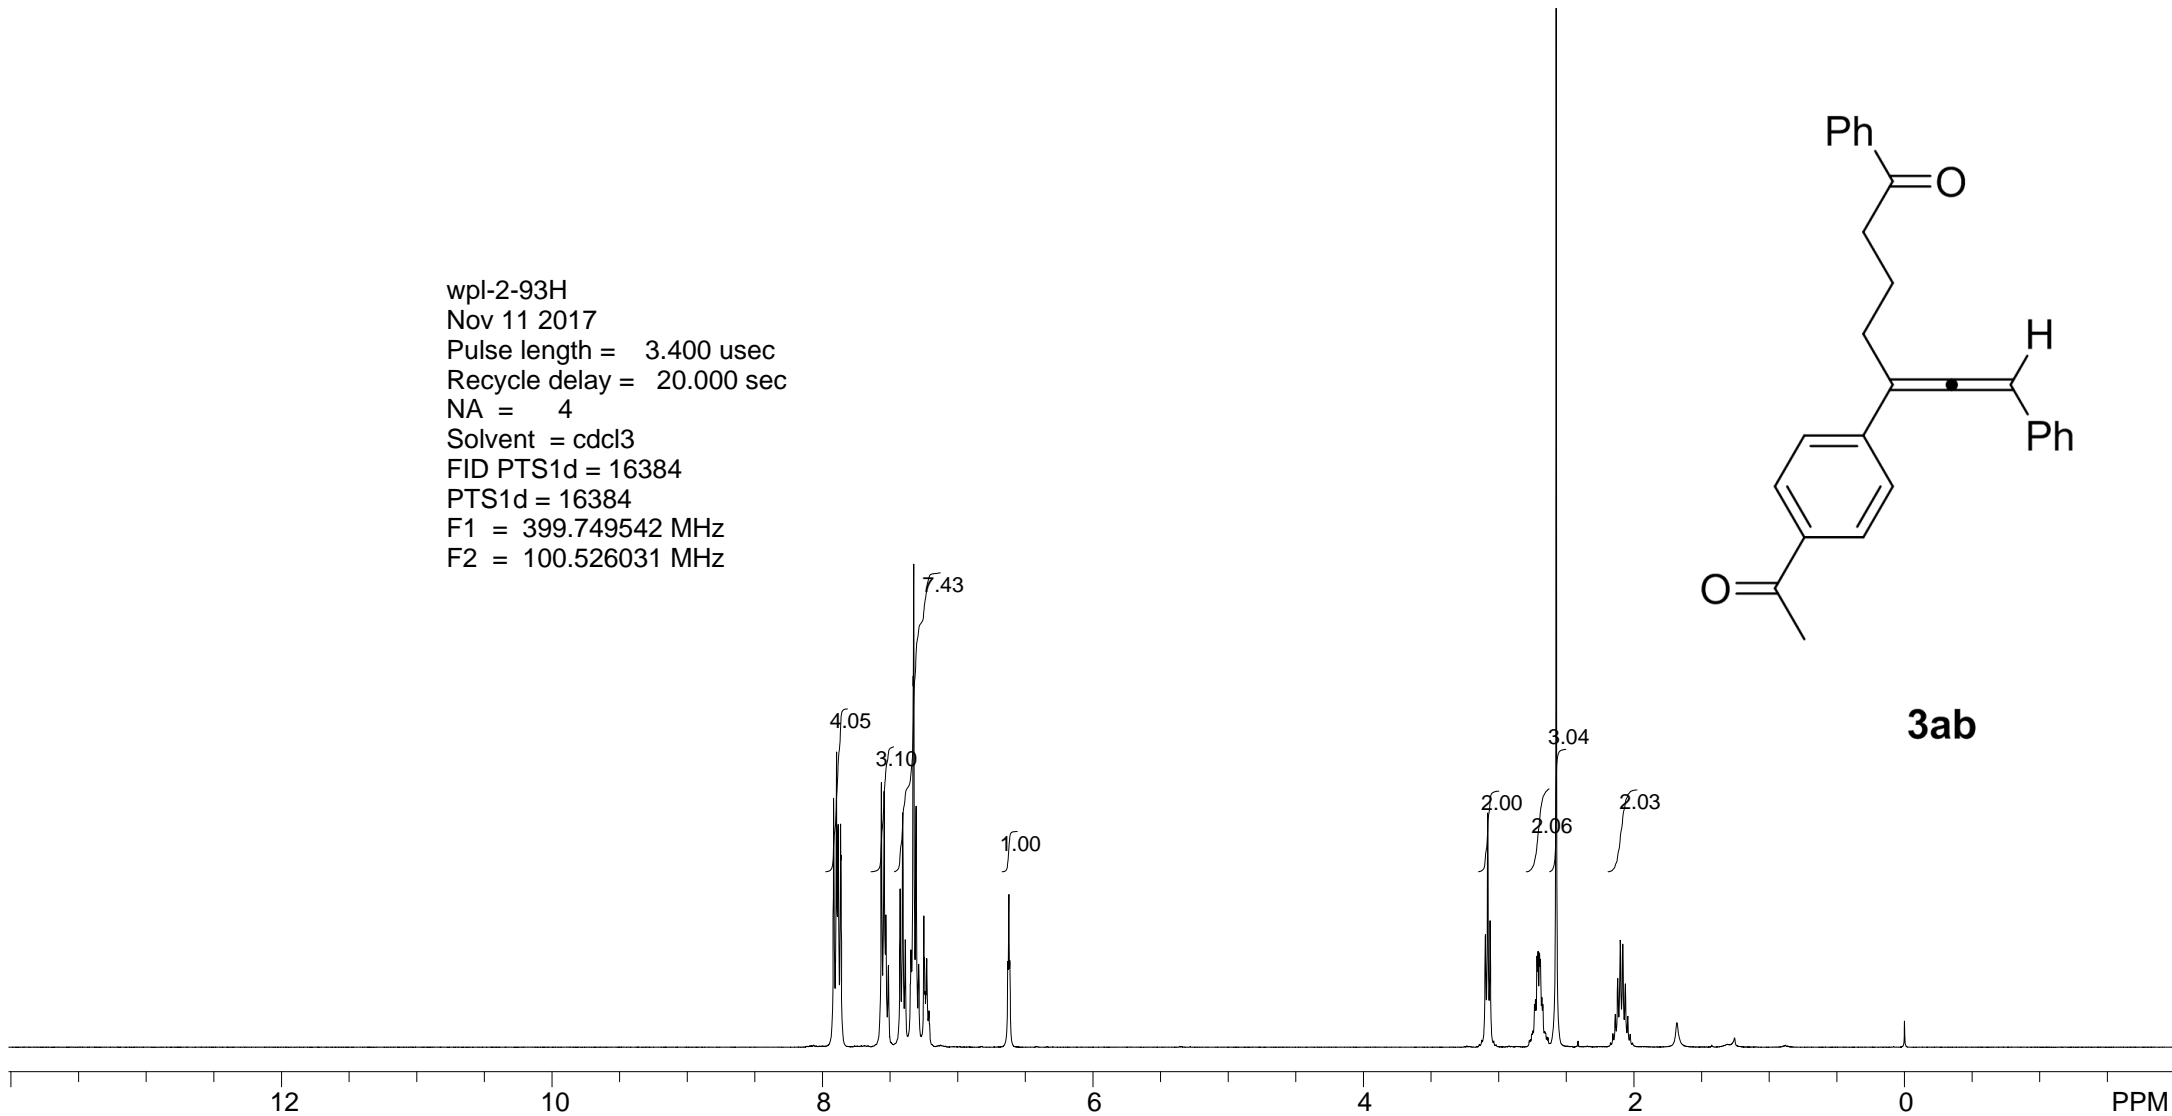

wpl-2-93C  
Nov 11 2017  
Pulse length = 4.000 usec  
Recycle delay = 1.000 sec  
NA = 512  
Solvent = cdcl3  
FID PTS1d = 32768  
PTS1d = 32768  
F1 = 100.527557 MHz  
F2 = 399.749146 MHz

207.540  
199.699  
197.513

136.858  
140.881  
135.666  
133.625  
132.941  
128.843  
128.630  
128.509  
127.932  
127.423  
126.877  
126.102  
108.994  
98.754

77.319  
77.000  
76.681

37.803  
29.454  
26.531  
22.159

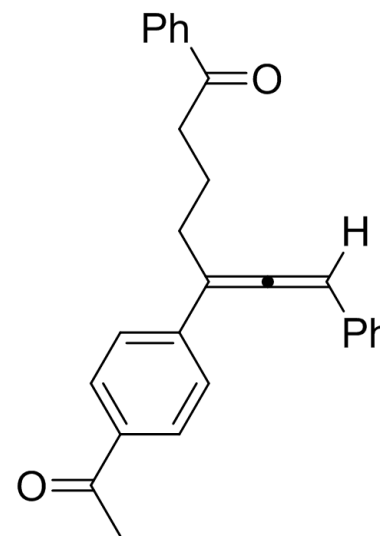

3ab

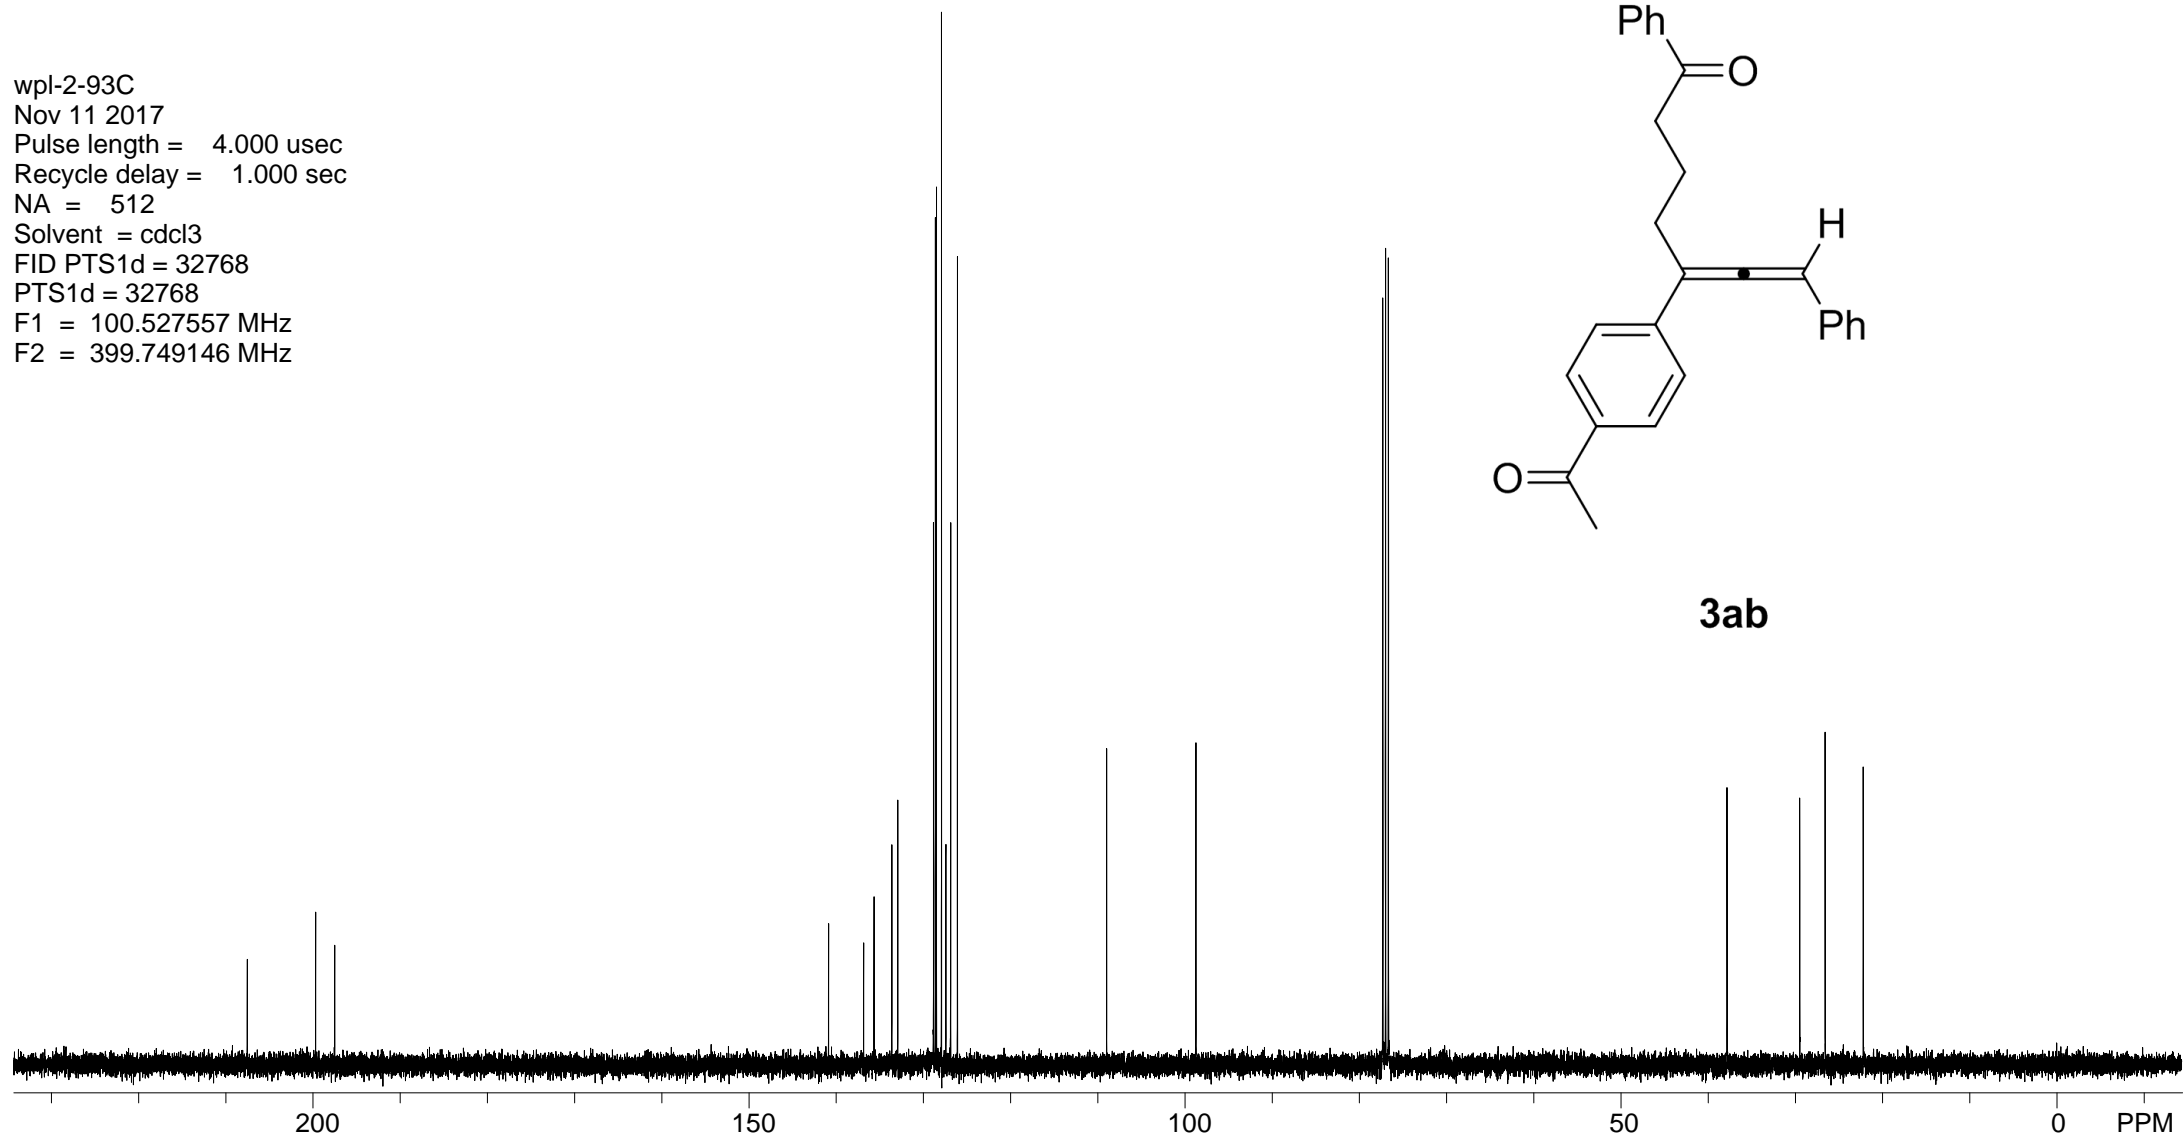

7.887  
7.869  
7.866  
7.529  
7.510  
7.492  
7.412  
7.393  
7.379  
7.375  
7.366  
7.363  
7.348  
7.302  
7.283  
7.264  
7.232  
7.218  
7.196  
7.181  
7.166  
7.152  
6.347  
6.340  
6.332  
3.080  
3.063  
3.044  
2.679  
2.671  
2.659  
2.653  
2.641  
2.633  
2.622  
2.613  
2.604  
2.594  
2.586  
2.572  
2.564  
2.037  
2.019  
2.003  
1.985  
1.966  
1.950  
-0.000

wpl-2-90H  
Nov 10 2017  
Pulse length = 3.400 usec  
Recycle delay = 20.000 sec  
NA = 4  
Solvent = cdcl3  
FID PTS1d = 16384  
PTS1d = 16384  
F1 = 399.749542 MHz  
F2 = 100.526031 MHz

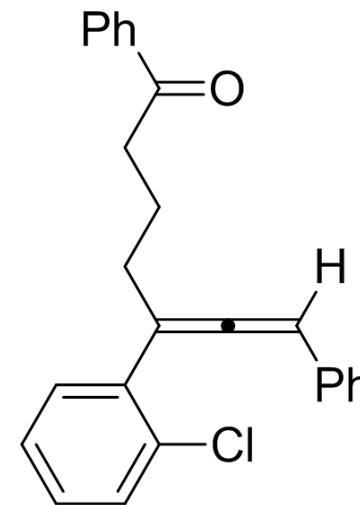

**3ac**

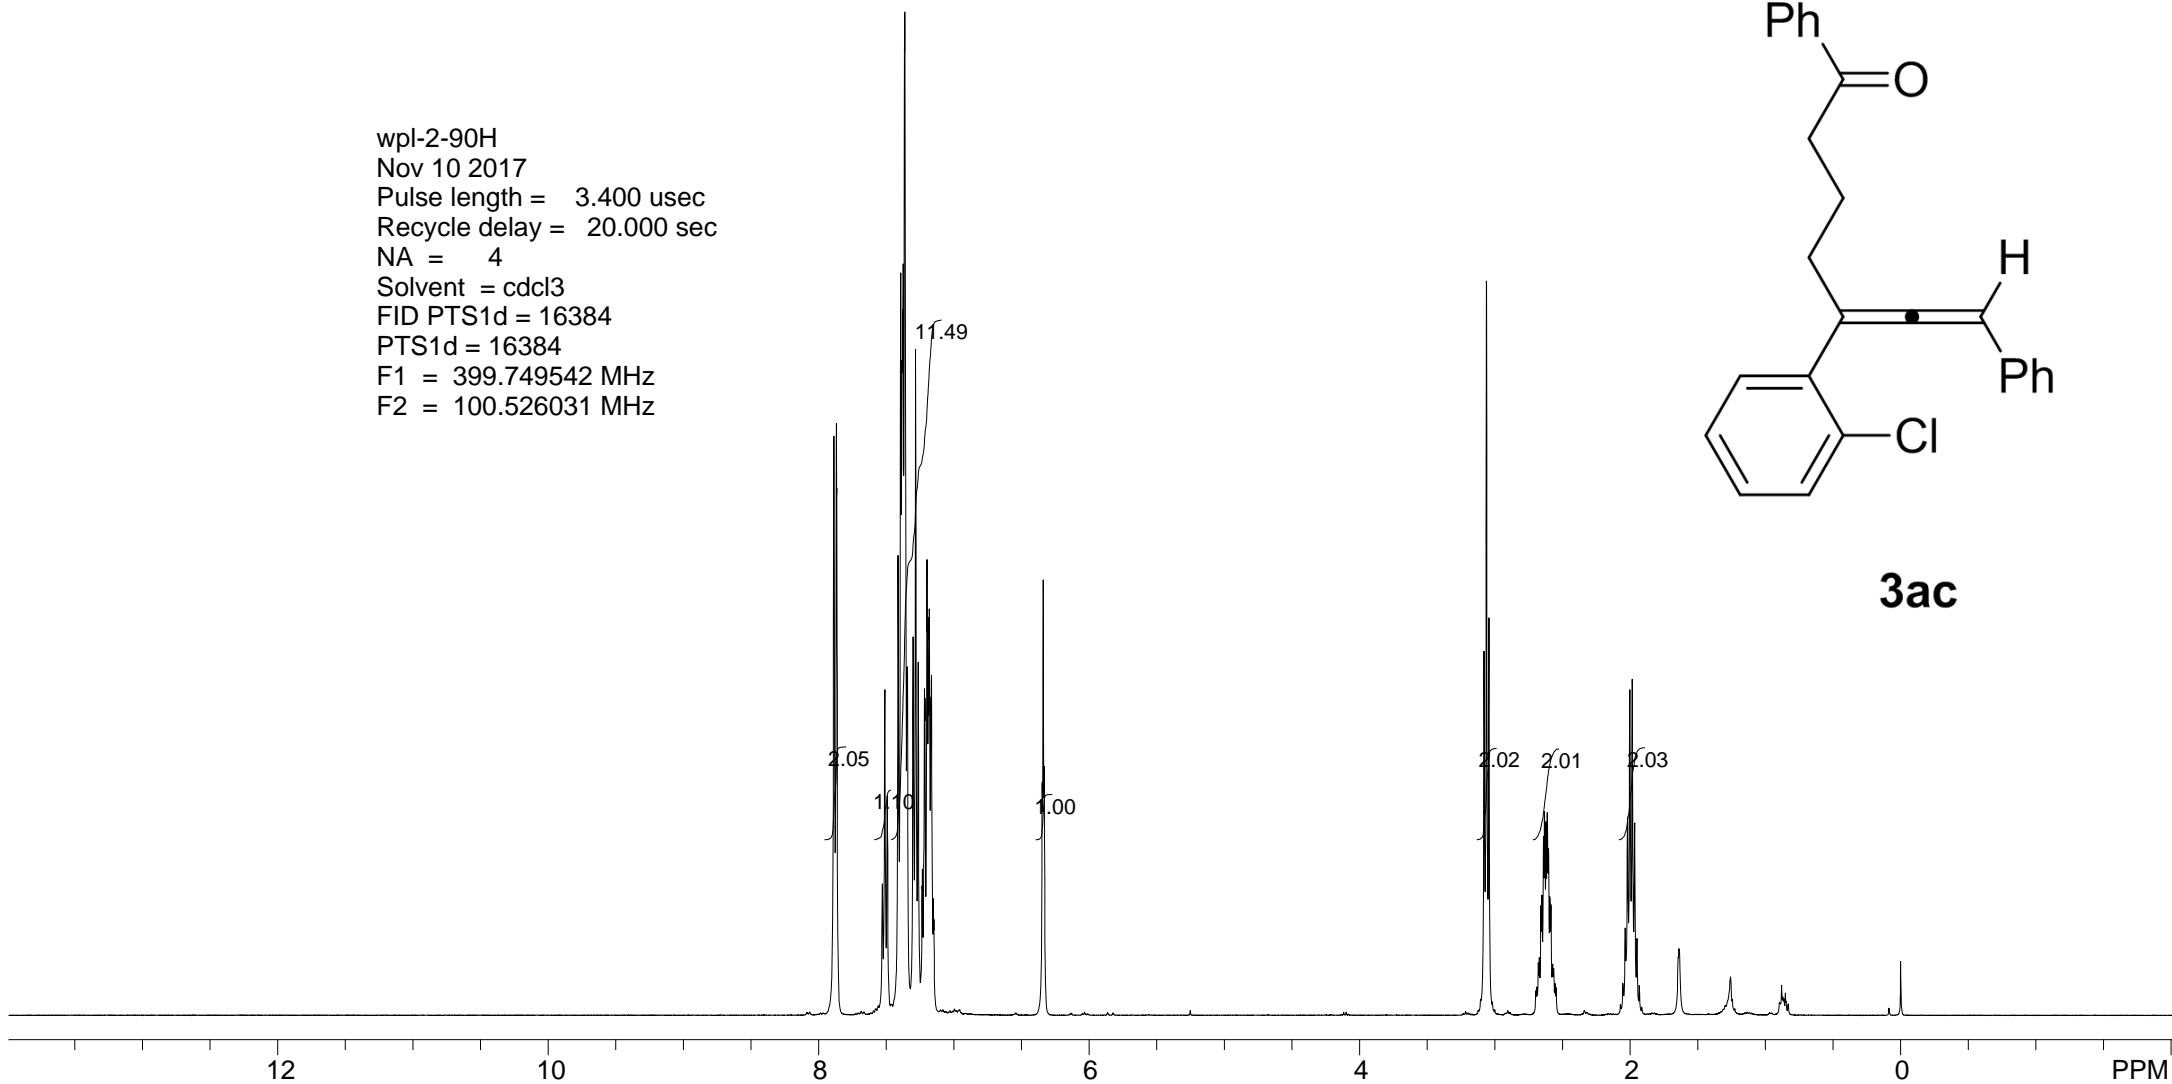



wpl-2-90C  
Nov 10 2017  
Pulse length = 4.000 usec  
Recycle delay = 1.000 sec  
NA = 512  
Solvent = cdcl3  
FID PTS1d = 32768  
PTS1d = 32768  
F1 = 100.527557 MHz  
F2 = 399.749146 MHz

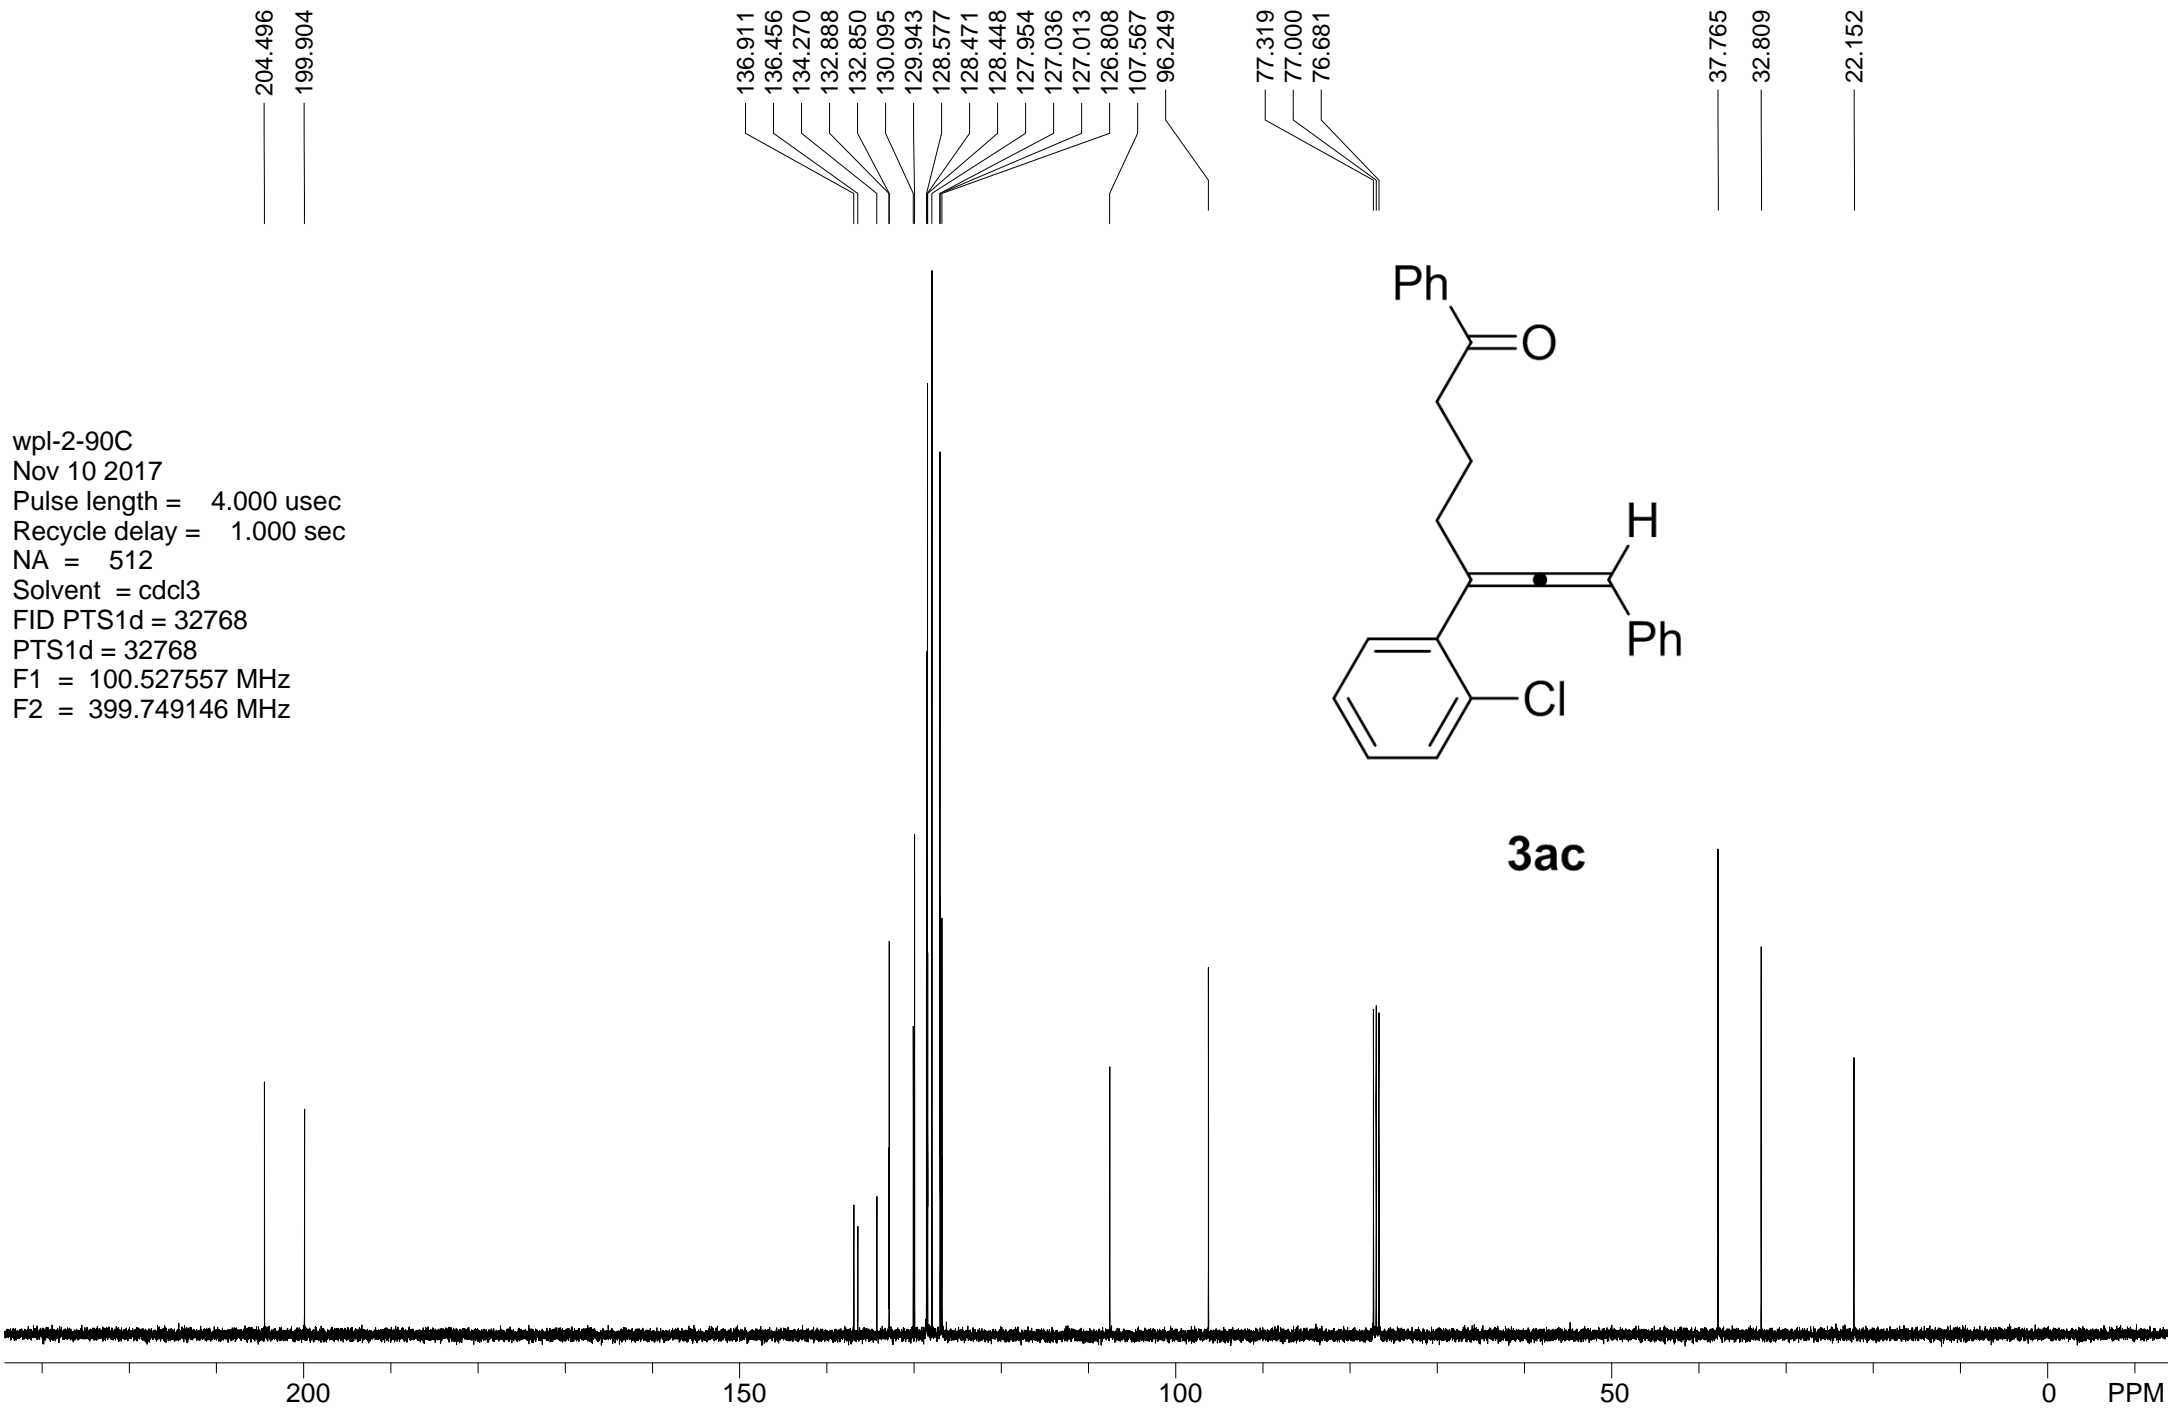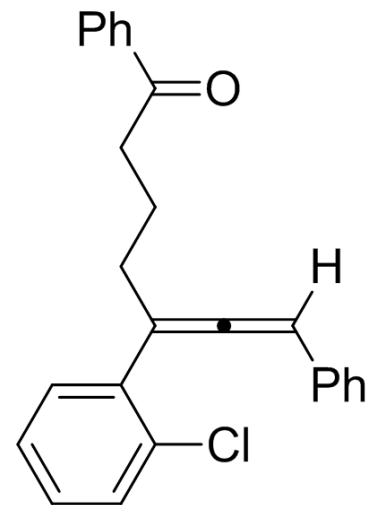

3ac

7.899  
7.881  
7.800  
7.797  
7.781  
7.778  
7.535  
7.516  
7.498  
7.469  
7.454  
7.451  
7.436  
7.432  
7.406  
7.397  
7.368  
7.350  
7.327  
7.323  
7.305  
7.298  
7.279  
7.260  
7.247  
7.191  
7.174  
7.155  
6.328  
6.320  
6.312  
3.840  
3.107  
3.089  
3.071  
2.602  
2.582  
2.575  
2.571  
2.560  
2.551  
2.540  
2.532  
2.071  
2.053  
2.034  
2.015  
1.997  
1.633  
0.000

wpl-2-112H  
Nov 29 2017  
Pulse length = 3.400 usec  
Recycle delay = 20.000 sec  
NA = 4  
Solvent = cdcl3  
FID PTS1d = 16384  
PTS1d = 16384  
F1 = 399.749542 MHz  
F2 = 100.526031 MHz

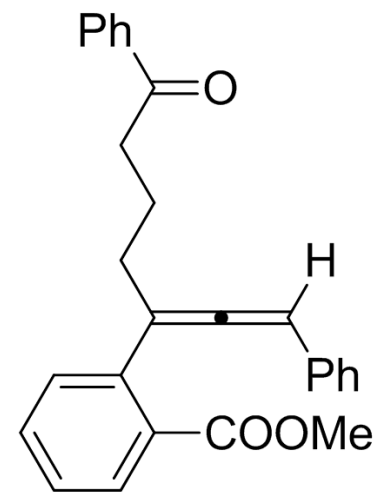

**3ad**

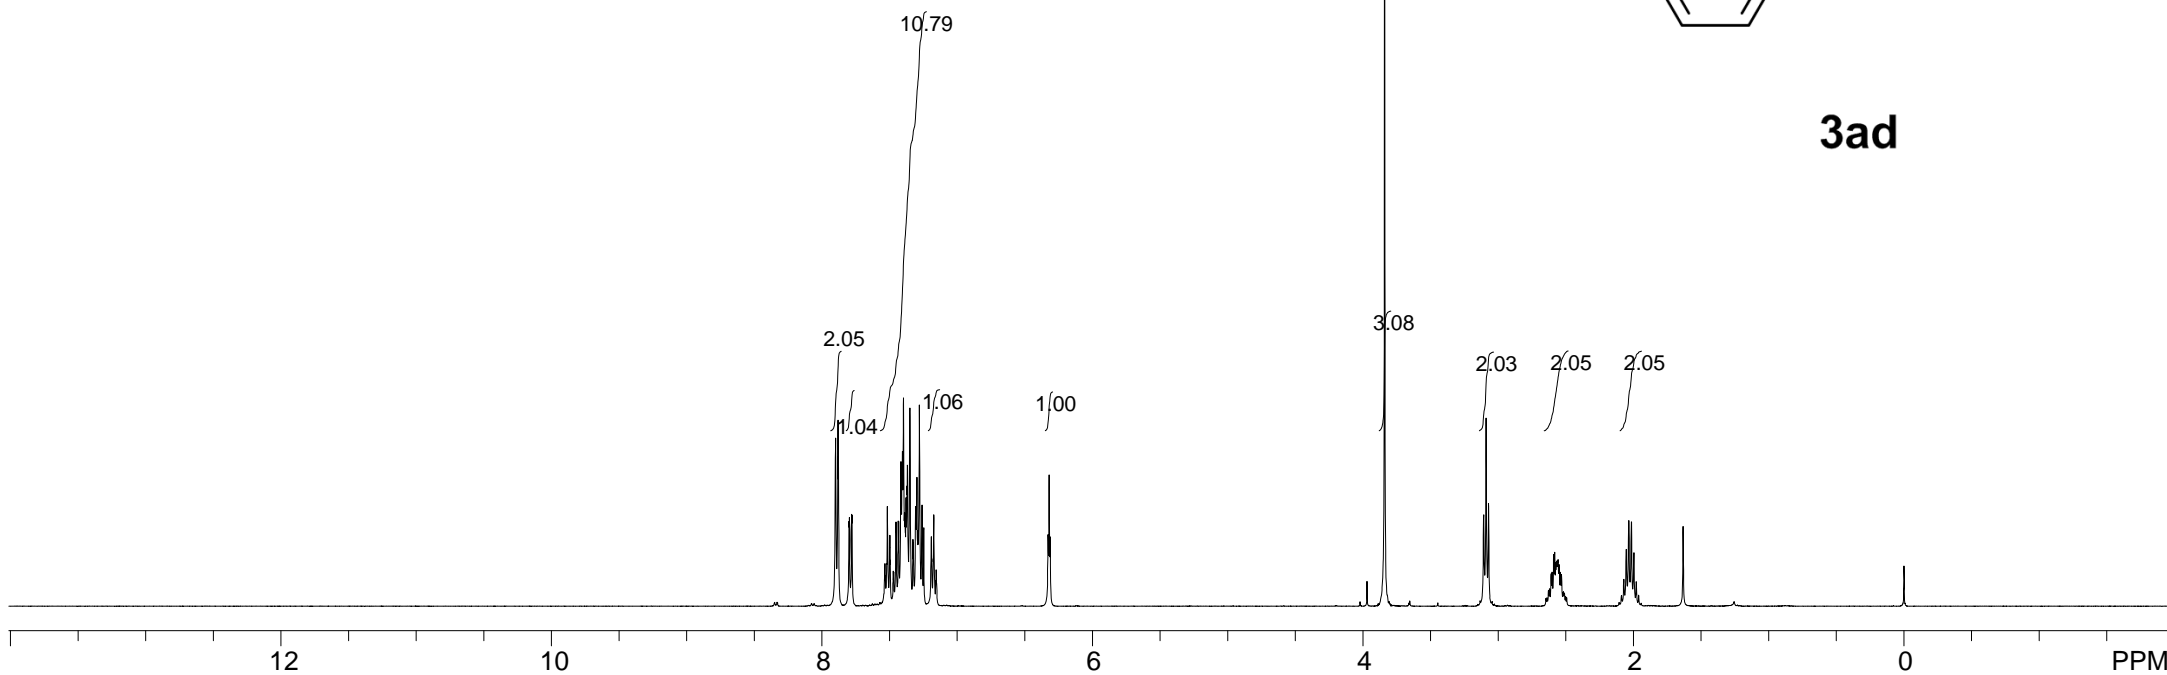

wpl-2-112C  
Nov 30 2017  
Pulse length = 4.000 usec  
Recycle delay = 1.000 sec  
NA = 512  
Solvent = cdcl3  
FID PTS1d = 32768  
PTS1d = 32768  
F1 = 100.527557 MHz  
F2 = 399.749146 MHz

203.737  
200.064

168.009

138.854  
136.980  
134.680  
132.774  
131.681  
130.141  
129.913  
129.860  
128.531  
128.425  
127.977  
127.188  
126.968  
126.915  
109.942  
96.348

77.319  
77.000  
76.681

52.103

37.758  
33.401

22.281

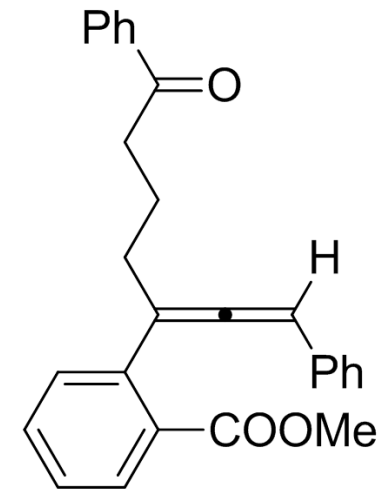

3ad

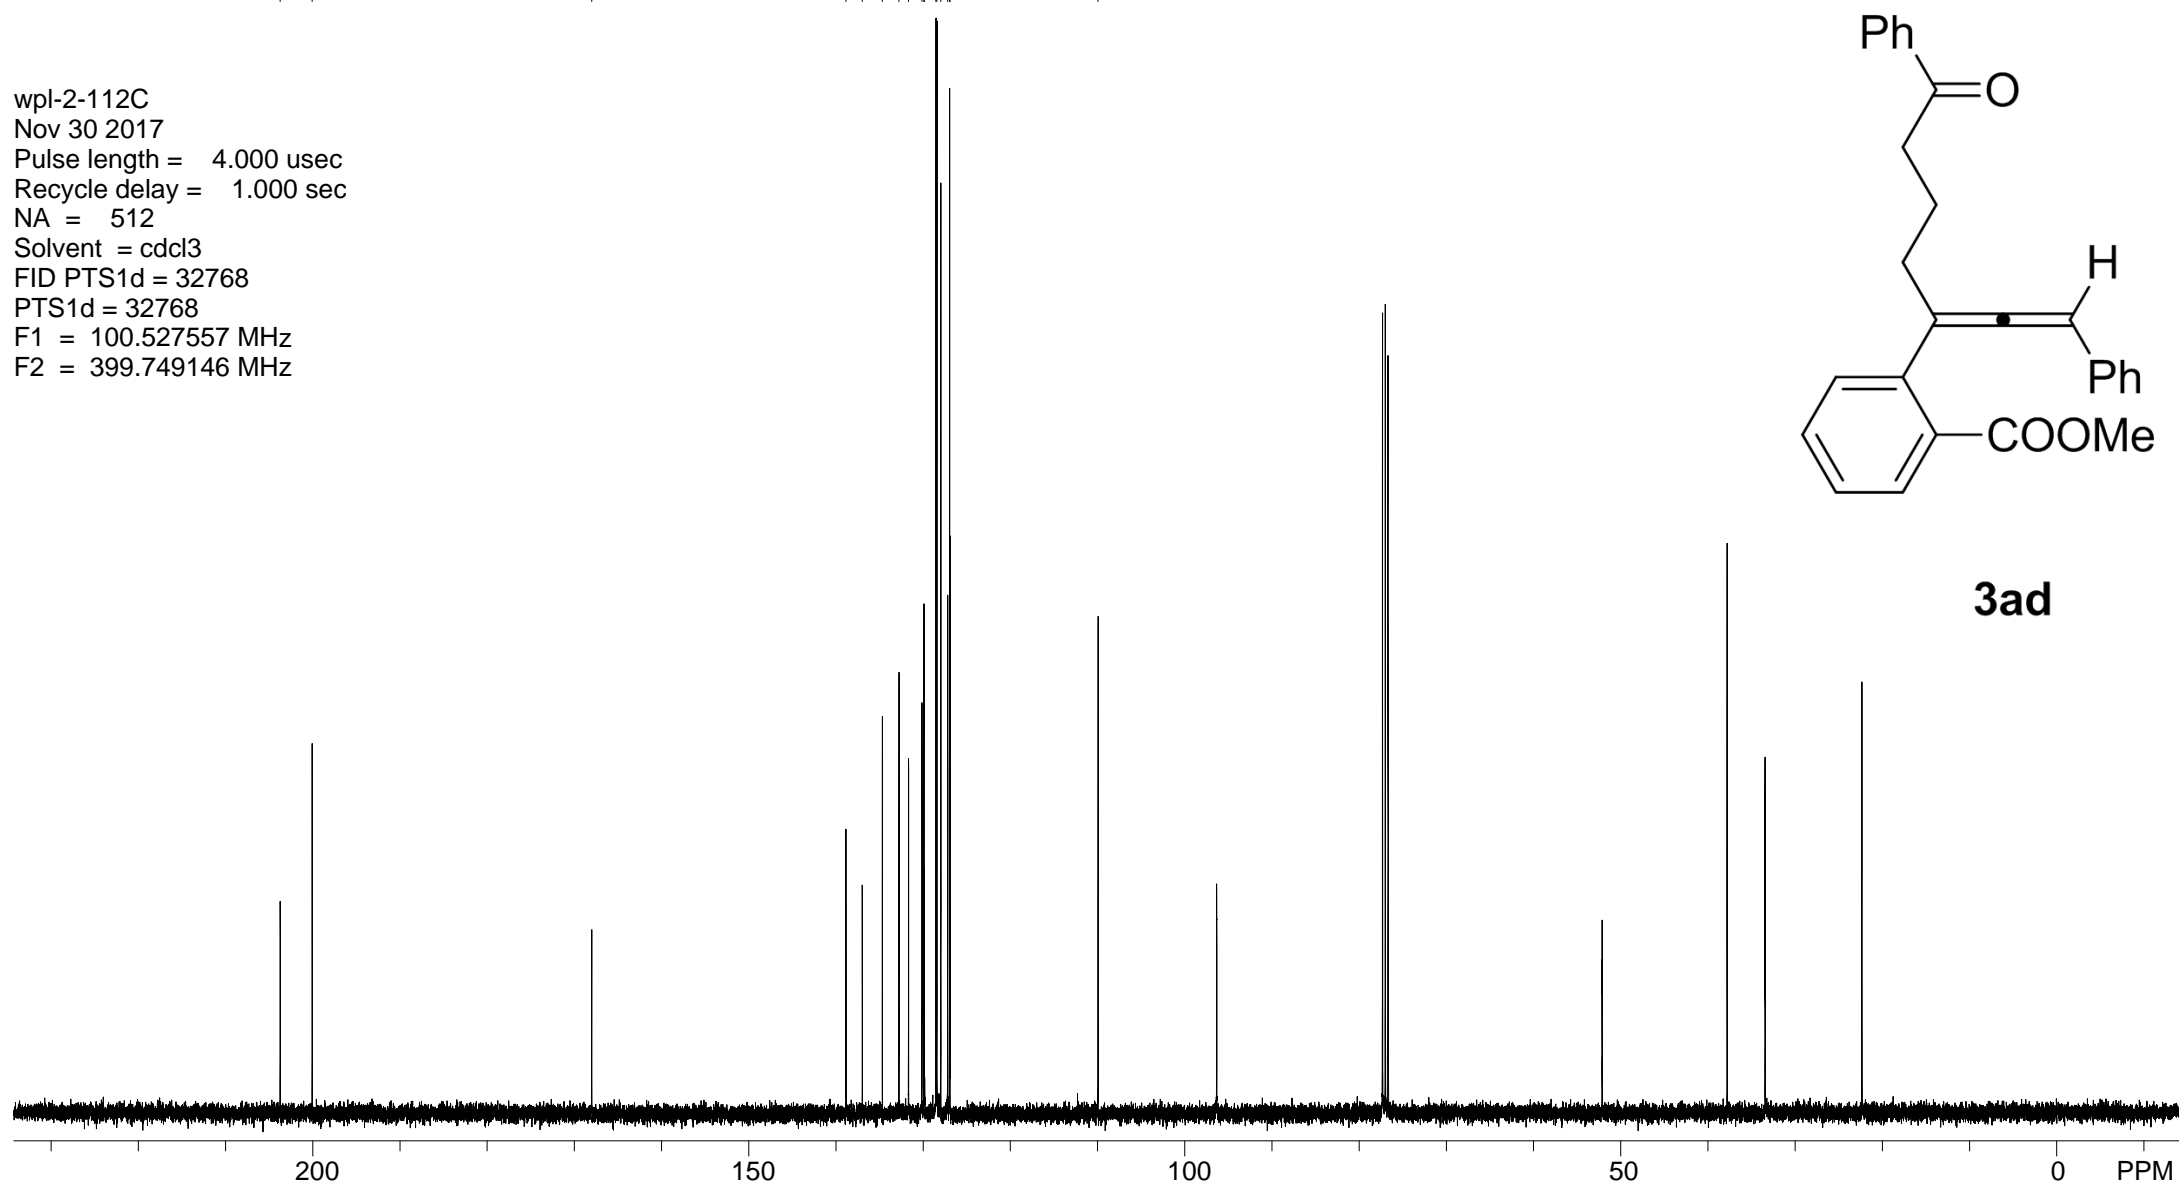

7.899  
7.881  
7.800  
7.797  
7.781  
7.778  
7.536  
7.517  
7.499  
7.471  
7.453  
7.434  
7.418  
7.406  
7.387  
7.367  
7.350  
7.324  
7.307  
7.299  
7.291  
7.280  
7.261  
7.250  
7.192  
7.174  
7.156  
6.329  
6.321  
6.313  
4.914  
3.841  
3.108  
3.090  
3.072  
2.609  
2.602  
2.590  
2.583  
2.575  
2.571  
2.567  
2.564  
2.560  
2.557  
2.551  
2.549  
2.541  
2.532  
2.071  
2.053  
2.034  
2.015  
1.997  
1.979  
1.637  
1.231  
0.000

Purity was determined to be 97% by using 7.5  $\mu$ L dibromomethane as the internal standard in 24.8 mg sample

wpl-2-112P  
Nov 30 2017  
Pulse length = 3.400 usec  
Recycle delay = 20.000 sec  
NA = 4  
Solvent = cdcl3  
FID PTS1d = 16384  
PTS1d = 16384  
F1 = 399.749542 MHz  
F2 = 100.526031 MHz

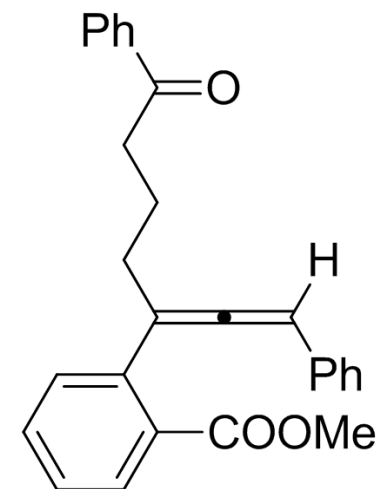

**3ad**

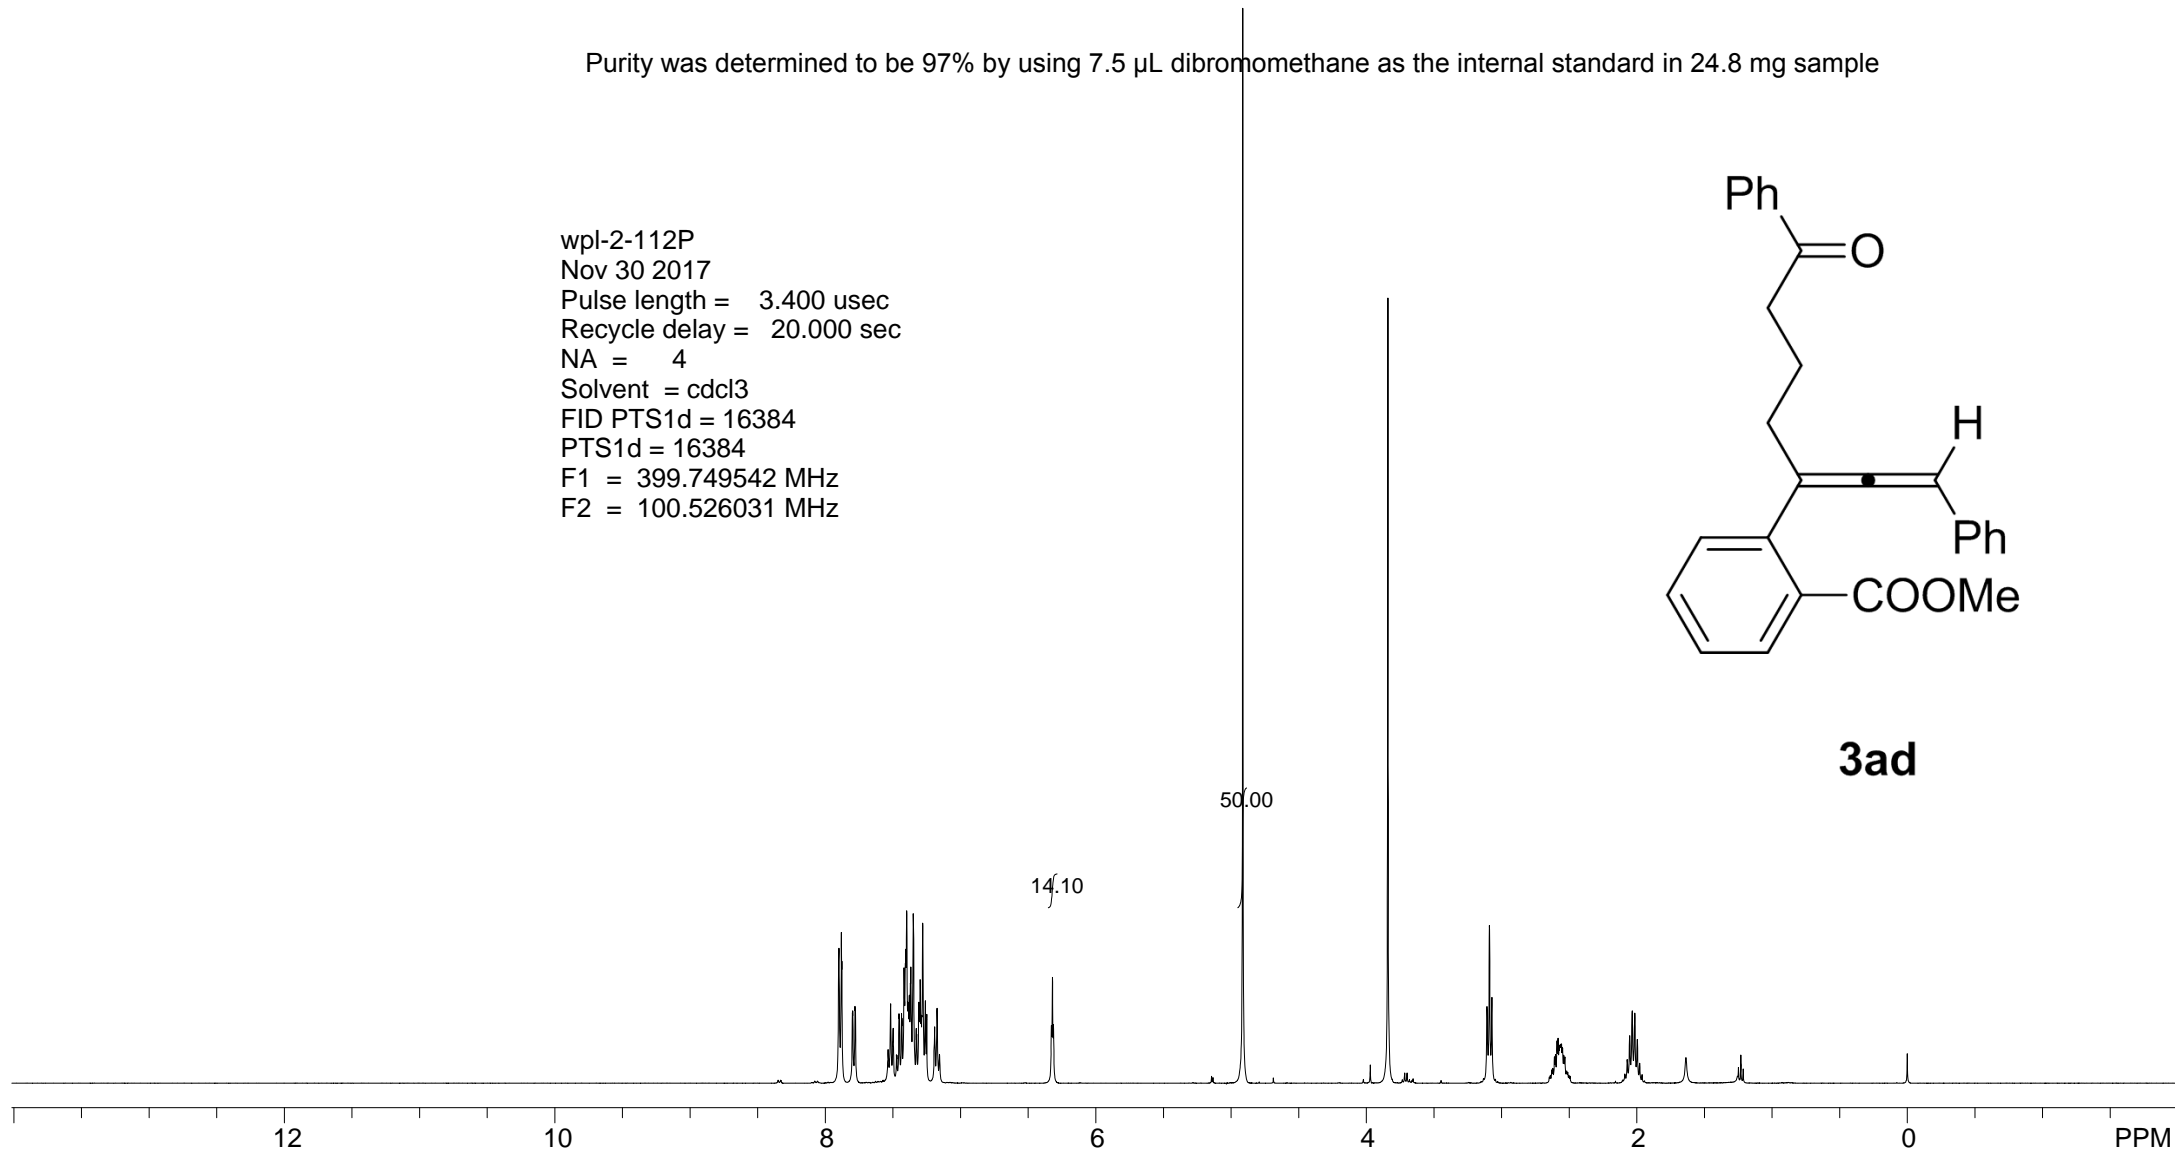

wpl-2-44H  
SOLVENT: CDCl3  
Pulse length = 10.000 usec  
Recycle delay = 1.000 sec  
NA = 8  
Solvent = CDCl3  
PTS1d = 65536  
F1 = 400.100006 MHz  
F2 = 1.000000 MHz

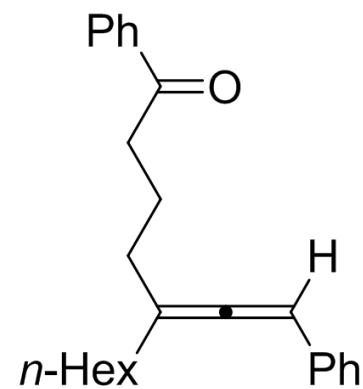

**3ae**

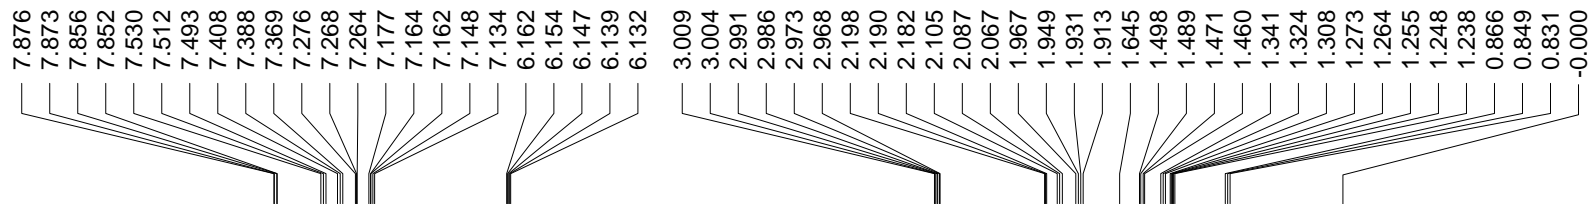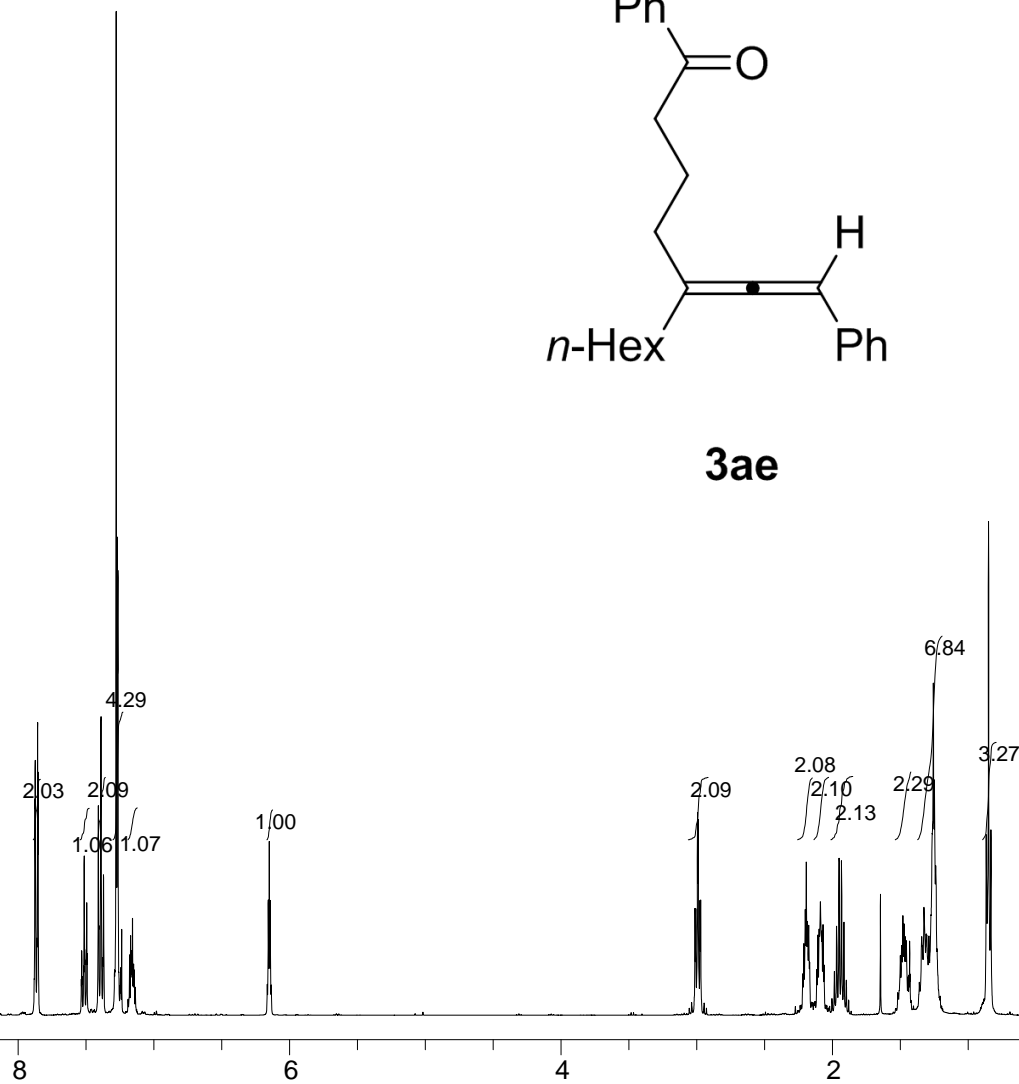

wpl-2-44C  
Oct 9 2017  
Pulse length = 10.000 usec  
Recycle delay = 1.000 sec  
NA = 512  
Solvent = CDCl3  
PTS1d = 32768  
F1 = 100.605225 MHz  
F2 = 1.000000 MHz

202.237  
200.168

136.956  
135.861  
132.811  
128.506  
128.460  
127.985  
126.414

108.074

95.747

77.322  
77.000  
76.686

37.967  
32.734  
32.221  
31.646  
29.087  
27.586  
22.591  
22.001  
14.018

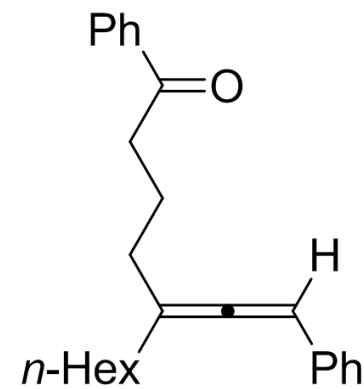

3ae

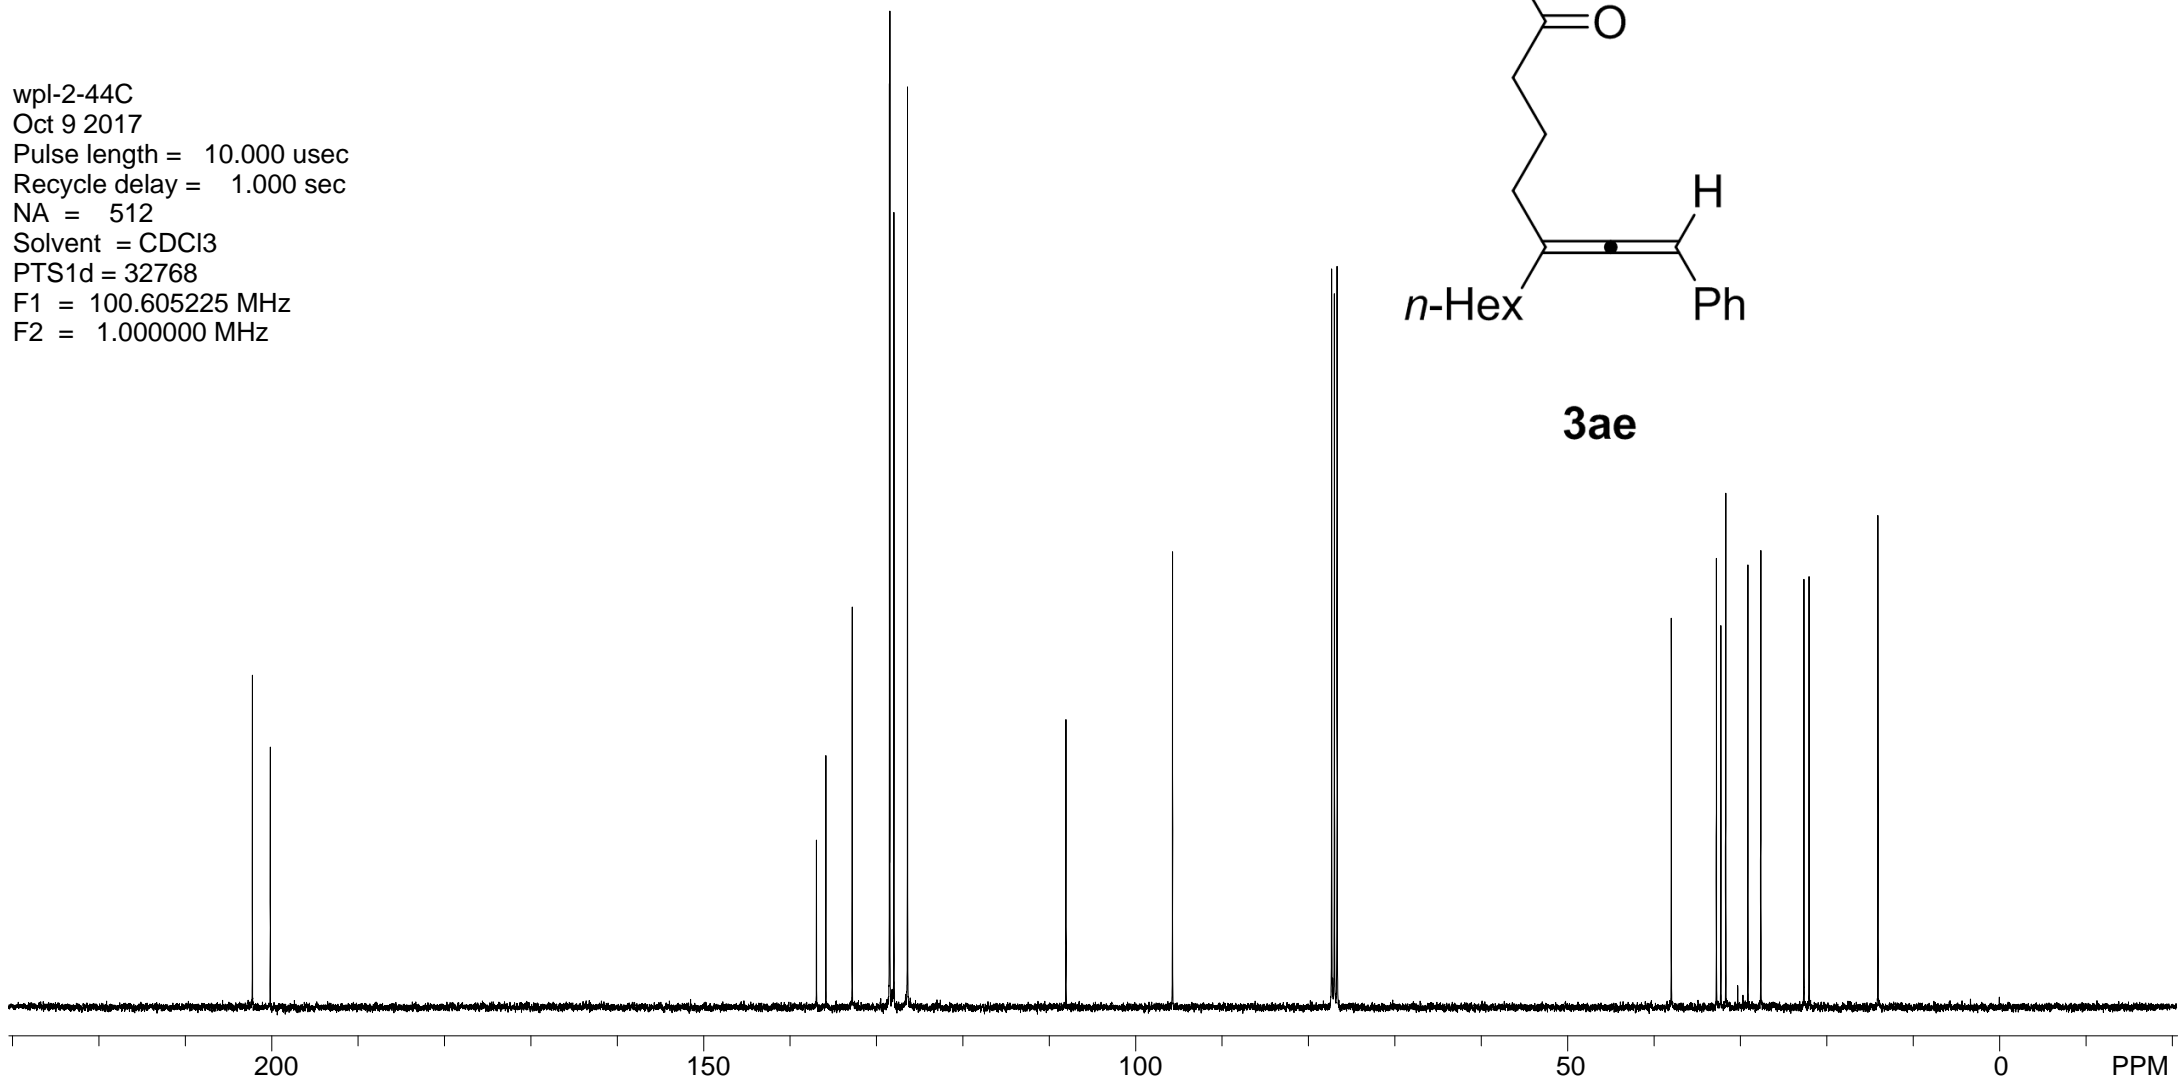

wpl-2-26H  
Sep 22 2017  
NA = 8  
Solvent = cdcl3  
FID PTS1d = 16384  
PTS1d = 16384  
F1 = 399.749542 MHz  
F2 = 100.526031 MHz

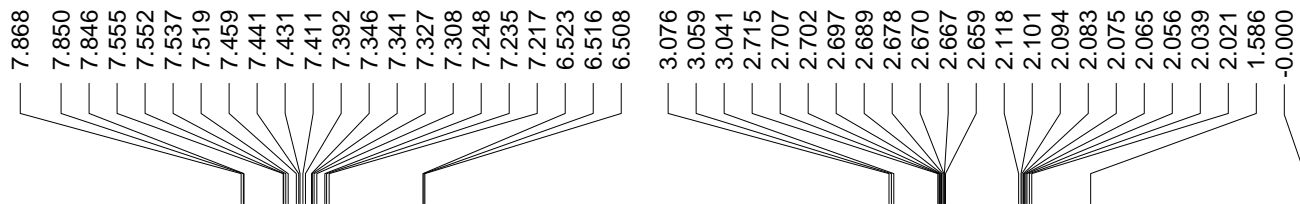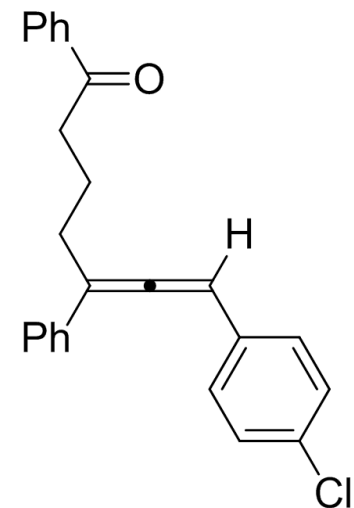

**3af**

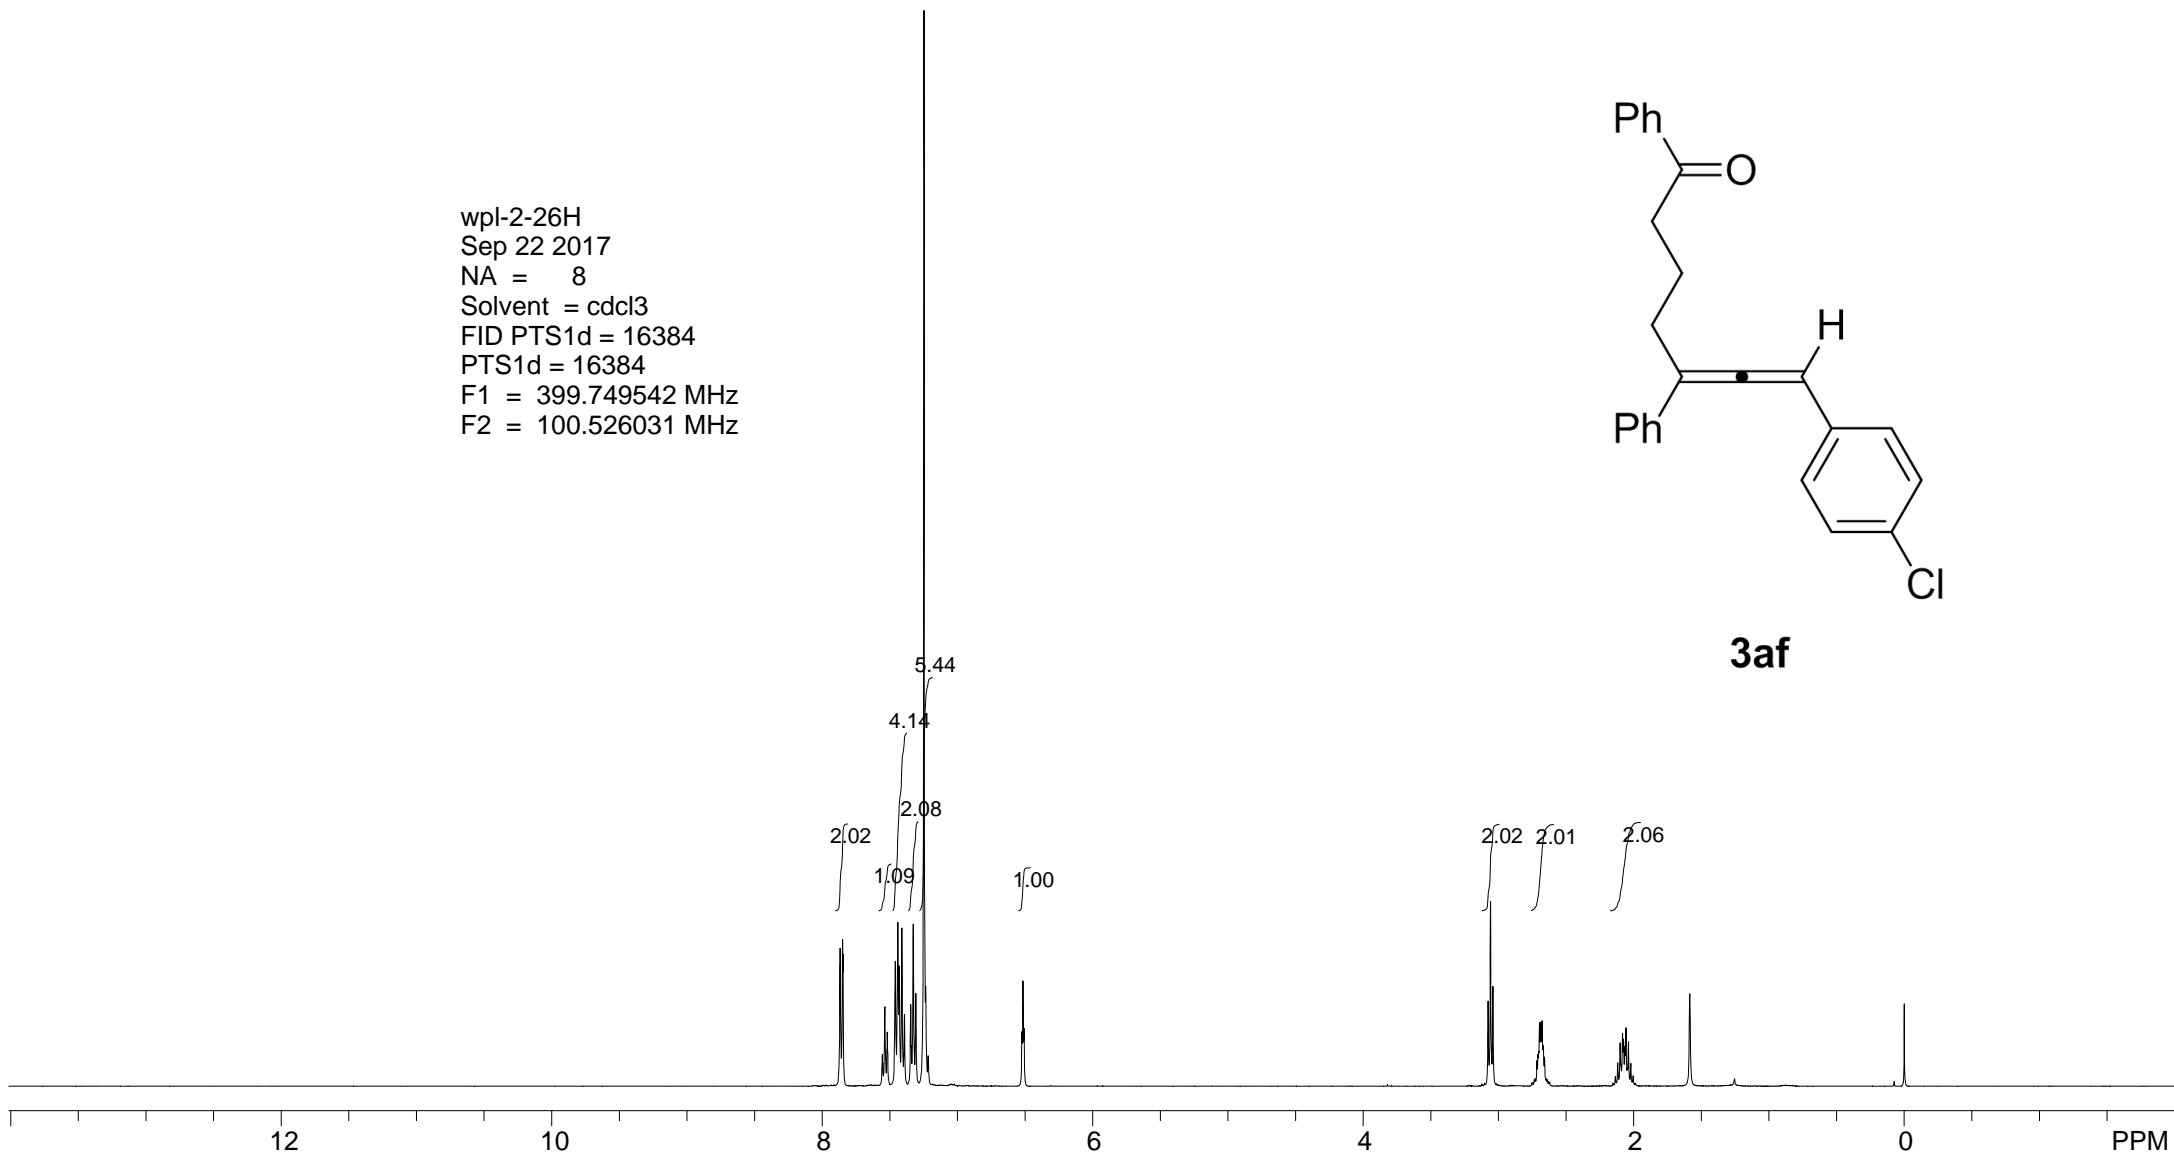

wpl-2-26C  
Sep 22 2017  
NA = 1000  
Solvent = cdcl3  
FID PTS1d = 32768  
PTS1d = 32768  
F1 = 100.527557 MHz  
F2 = 399.749146 MHz

206.561  
199.813

136.881  
135.423  
132.957  
132.676  
128.903  
128.607  
128.516  
127.932  
127.347  
126.080  
109.768

97.395

77.319  
77.000  
76.681

37.902

29.552

22.136

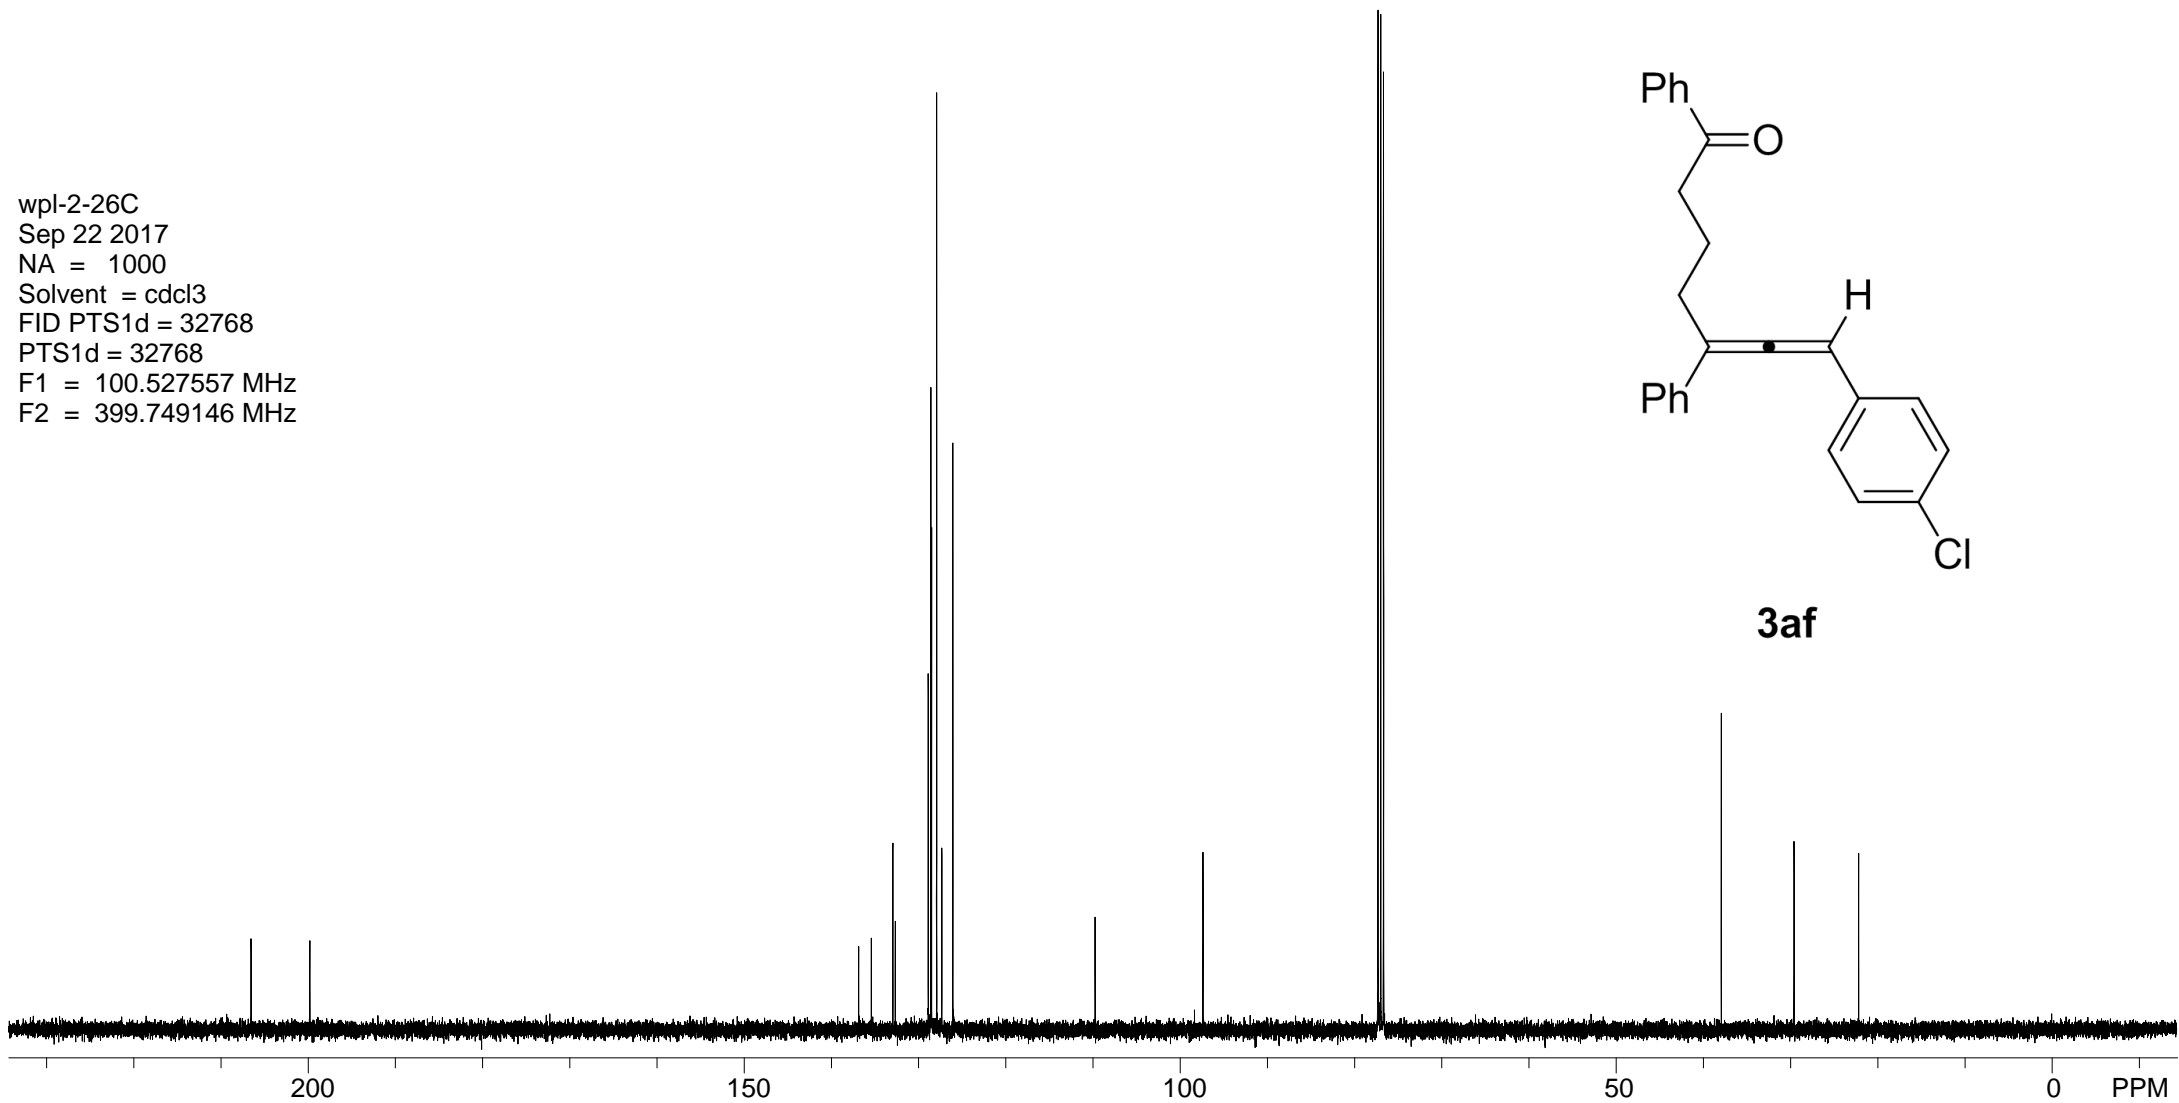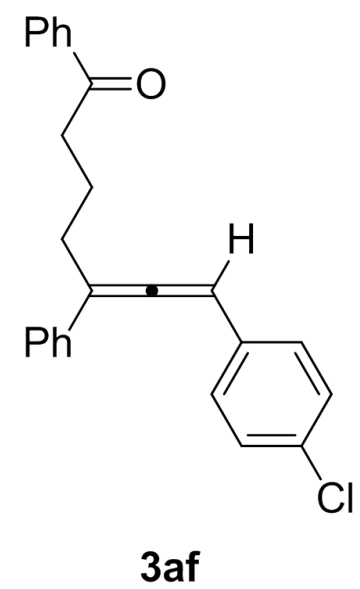



7.879  
7.862  
7.551  
7.532  
7.513  
7.450  
7.431  
7.412  
7.393  
7.381  
7.352  
7.334  
7.315  
7.305  
7.263  
7.244  
7.227  
7.140  
7.135  
7.119  
7.114  
6.464  
6.457  
6.450  
3.076  
3.059  
3.041  
2.717  
2.709  
2.700  
2.691  
2.681  
2.672  
2.665  
2.113  
2.096  
2.078  
2.066  
2.060  
2.048  
2.030  
2.012  
1.606  
-0.000

wpl-2-104H  
Nov 22 2017  
Pulse length = 3.400 usec  
Recycle delay = 20.000 sec  
NA = 4  
Solvent = cdcl3  
FID PTS1d = 16384  
PTS1d = 16384  
F1 = 399.749542 MHz  
F2 = 100.526031 MHz

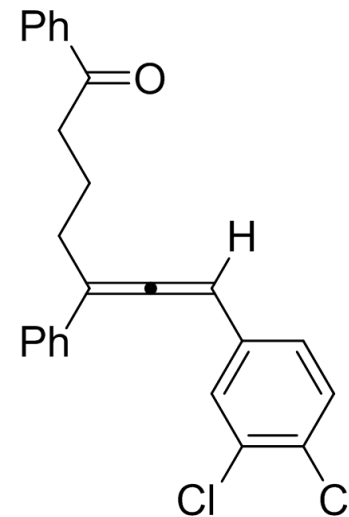

**3ag**

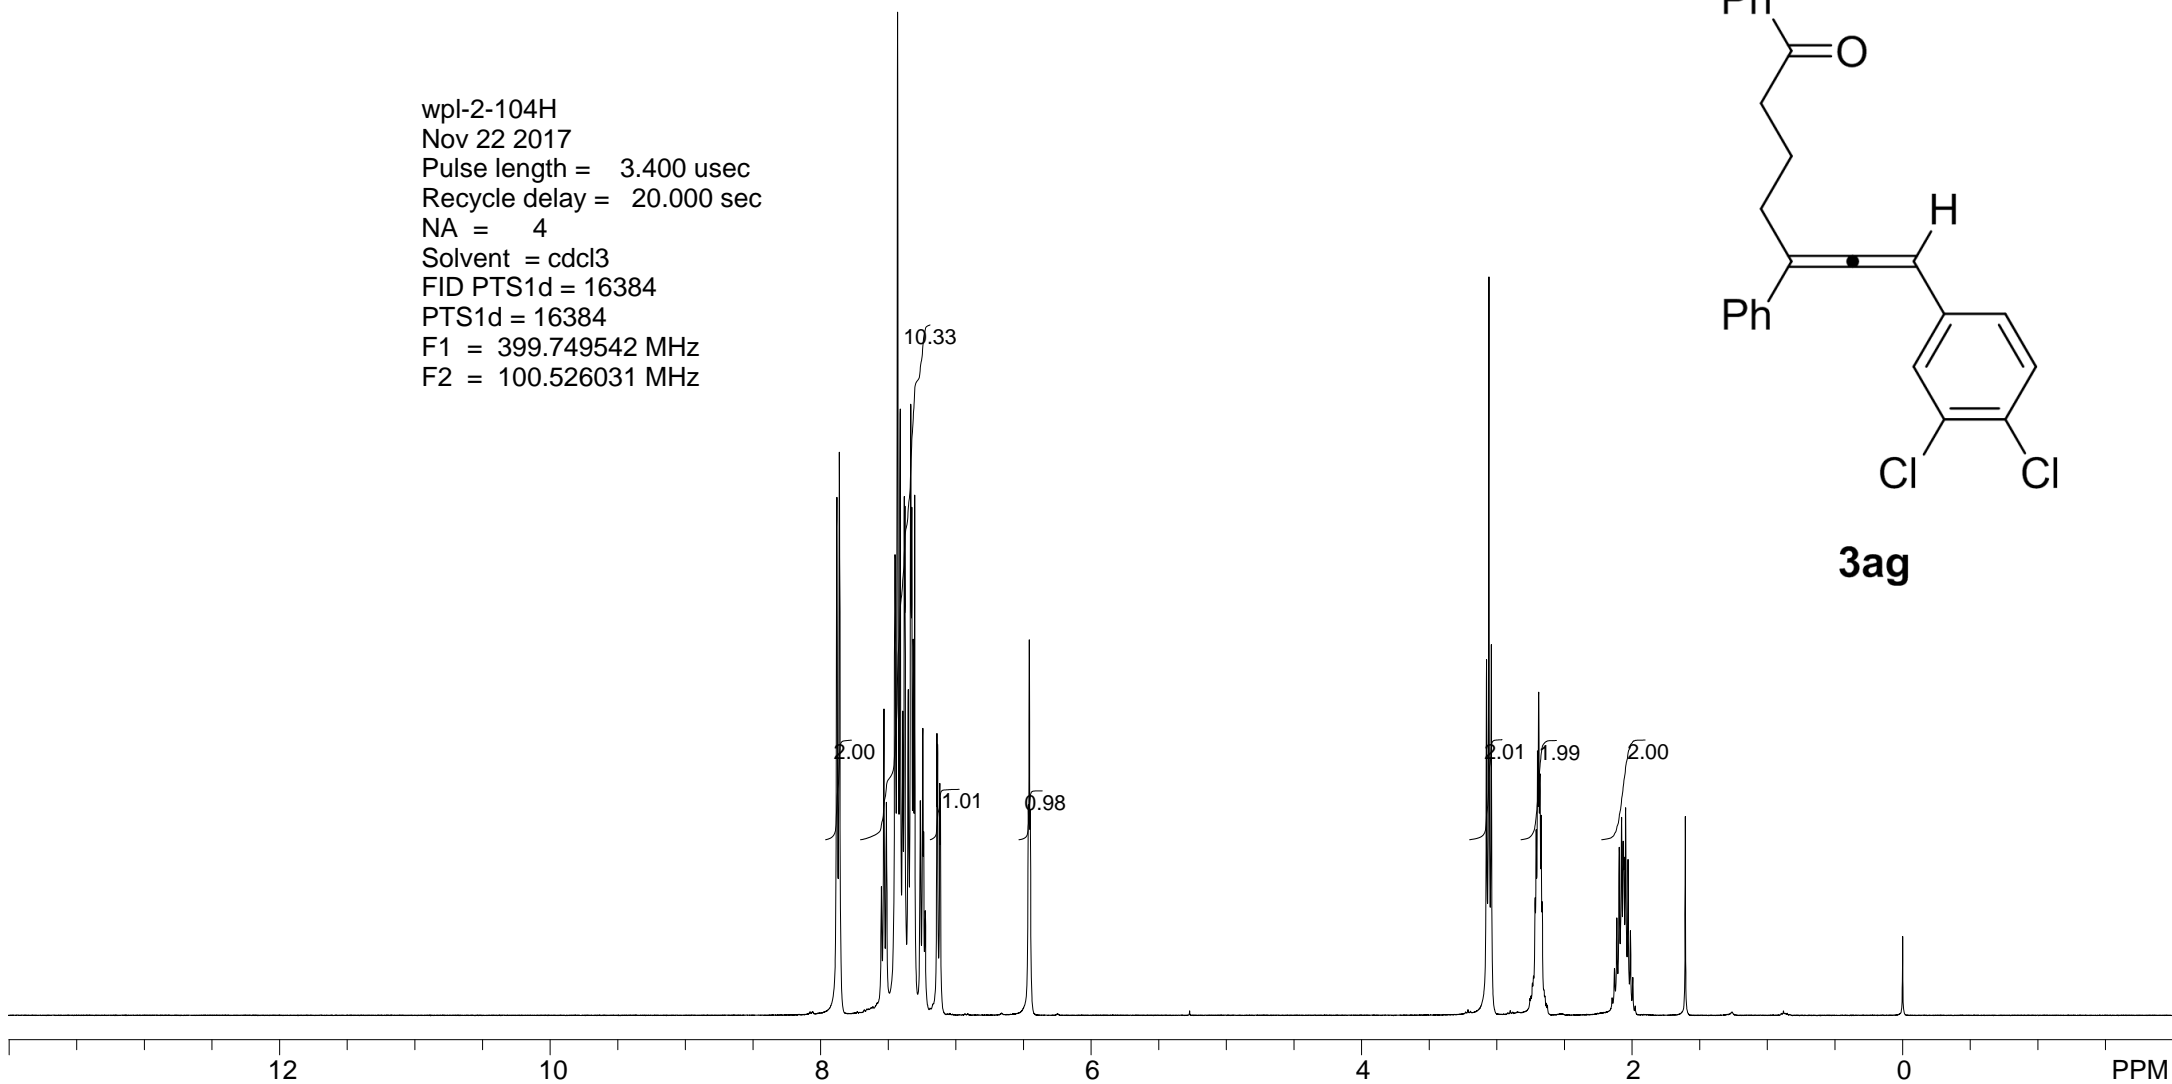

wpl-2-104C  
Nov 22 2017  
Pulse length = 4.000 usec  
Recycle delay = 1.000 sec  
NA = 512  
Solvent = cdcl3  
FID PTS1d = 32768  
PTS1d = 32768  
F1 = 100.527557 MHz  
F2 = 399.749146 MHz

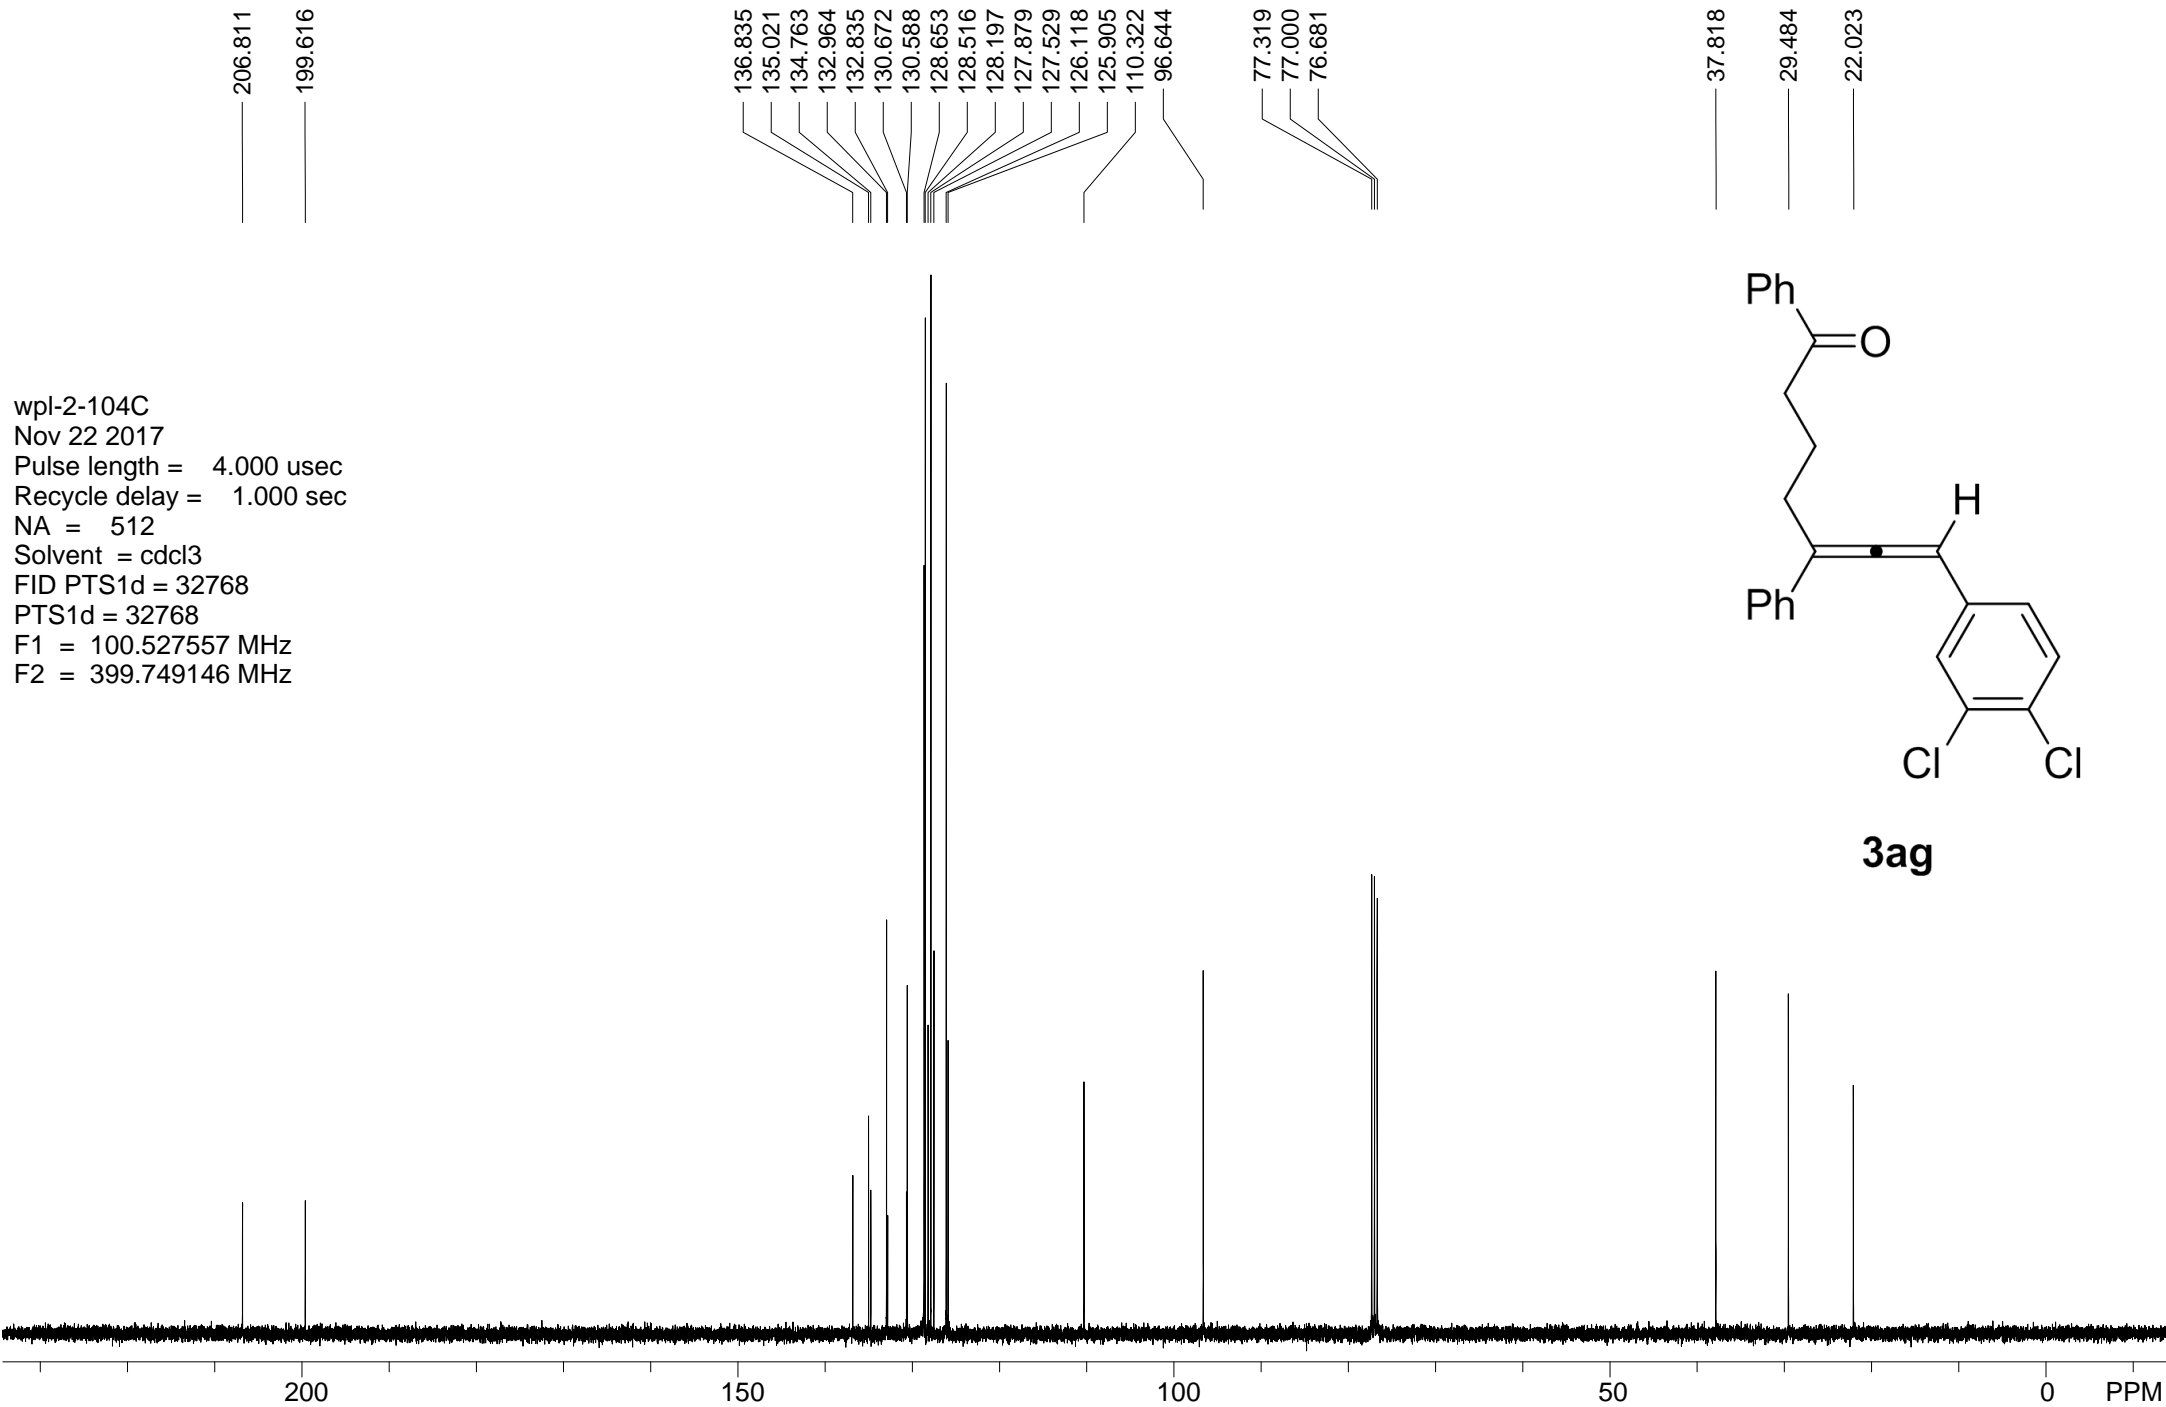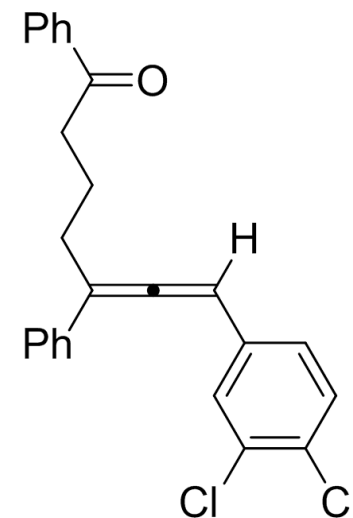

**3ag**

7.914  
7.896  
7.616  
7.614  
7.597  
7.595  
7.554  
7.542  
7.536  
7.521  
7.465  
7.462  
7.444  
7.424  
7.406  
7.357  
7.338  
7.319  
7.272  
7.268  
7.253  
7.241  
7.234  
6.941  
6.934  
6.926  
3.102  
3.084  
3.067  
2.758  
2.750  
2.739  
2.732  
2.719  
2.712  
2.700  
2.692  
2.119  
2.101  
2.083  
2.067  
2.050  
0.000

wpl-2-111H  
Nov 28 2017  
Pulse length = 3.400 usec  
Recycle delay = 20.000 sec  
NA = 4  
Solvent = cdcl3  
FID PTS1d = 16384  
PTS1d = 16384  
F1 = 399.749542 MHz  
F2 = 100.526031 MHz

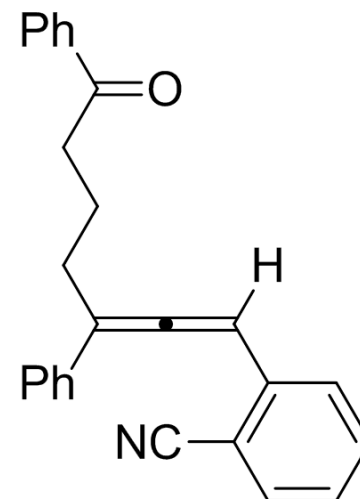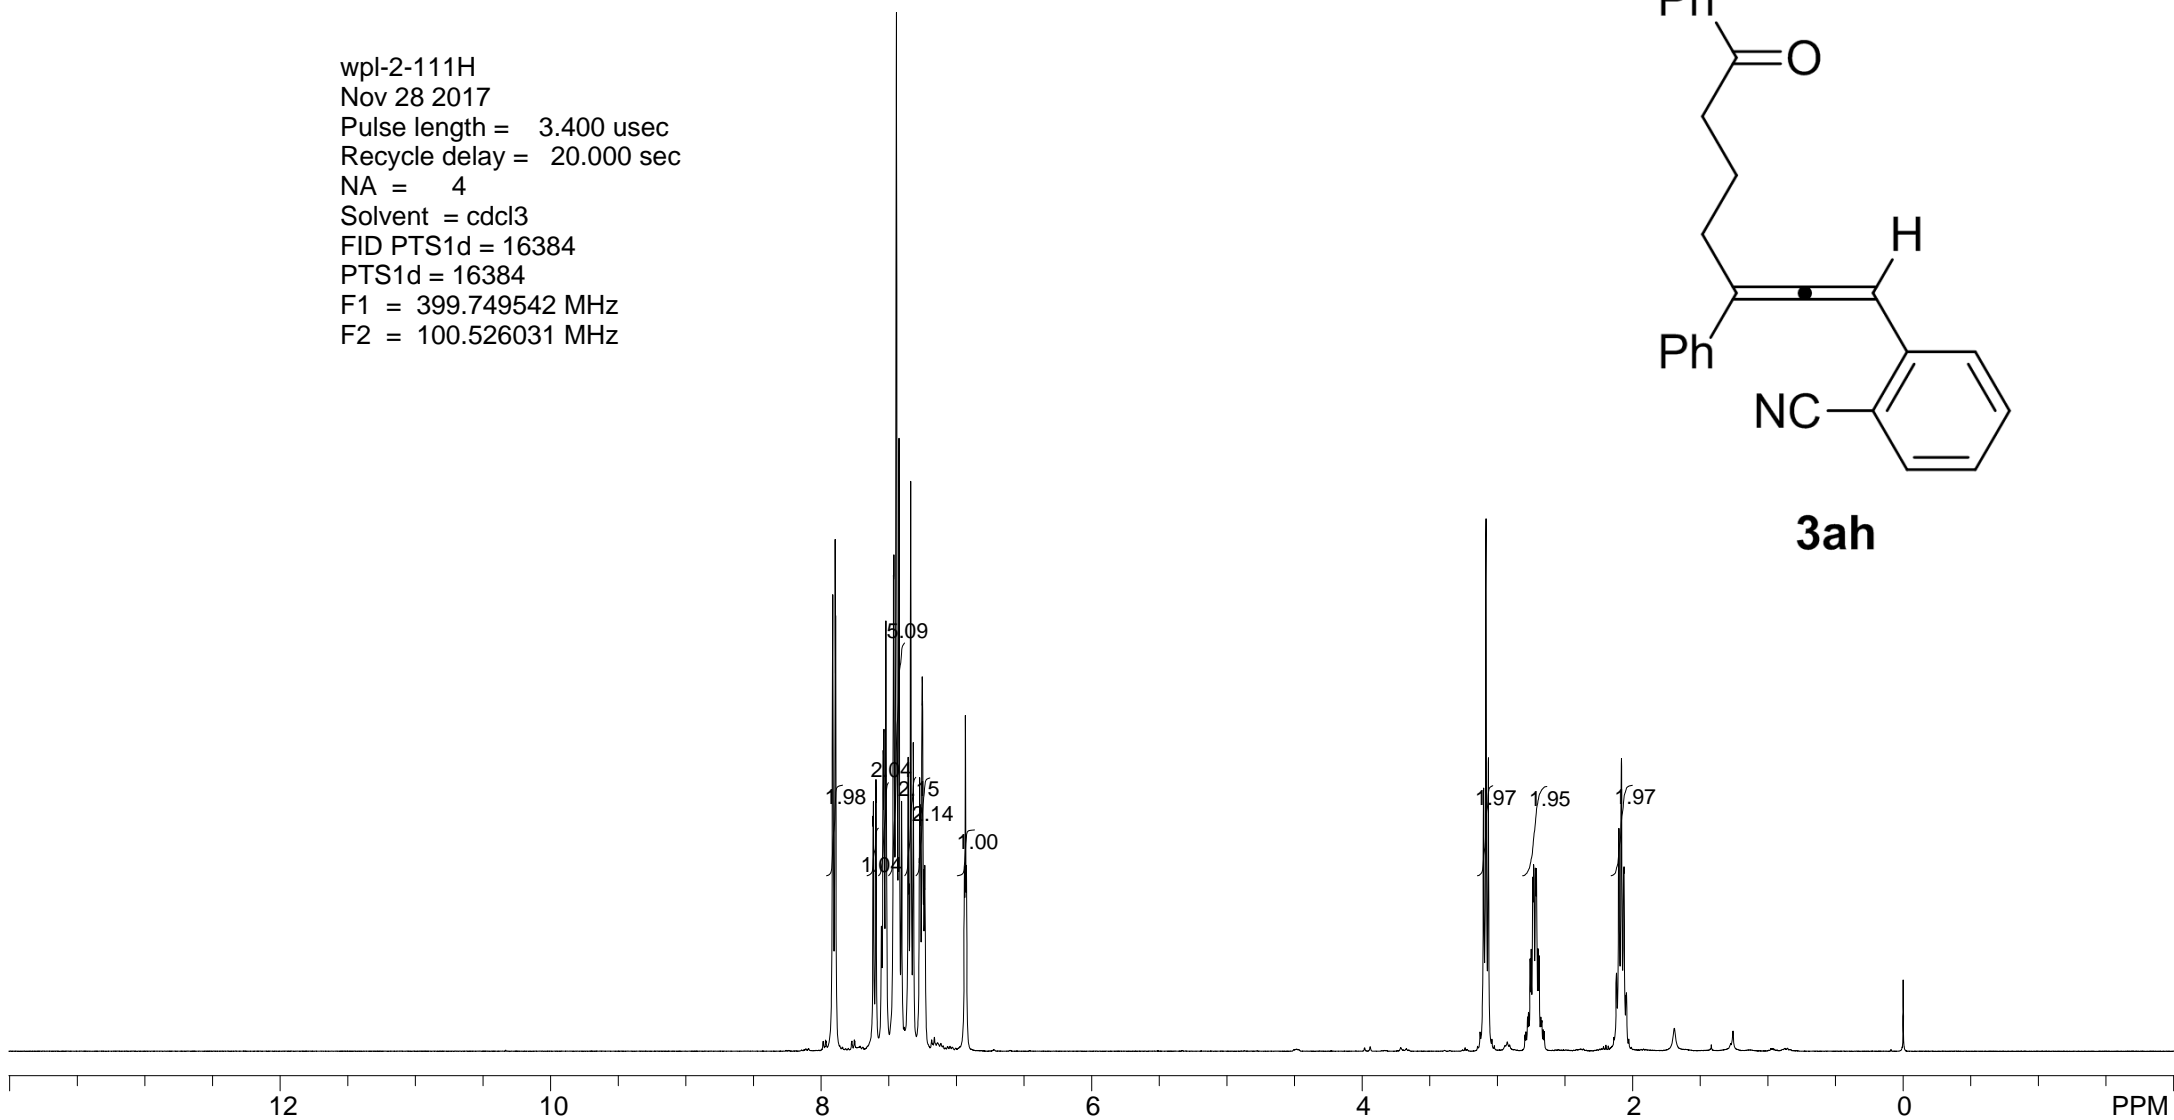

wpl-2-111C  
Nov 25 2017  
Pulse length = 4.000 usec  
Recycle delay = 1.000 sec  
NA = 512  
Solvent = cdcl3  
FID PTS1d = 32768  
PTS1d = 32768  
F1 = 100.527557 MHz  
F2 = 399.749146 MHz

208.049  
199.608

138.126  
136.805  
134.596  
133.040  
132.964  
132.714  
128.638  
128.516  
127.894  
127.628  
127.173  
127.013  
126.209  
117.647  
110.868  
110.163  
95.050

77.319  
77.000  
76.681

37.803  
29.567  
22.205

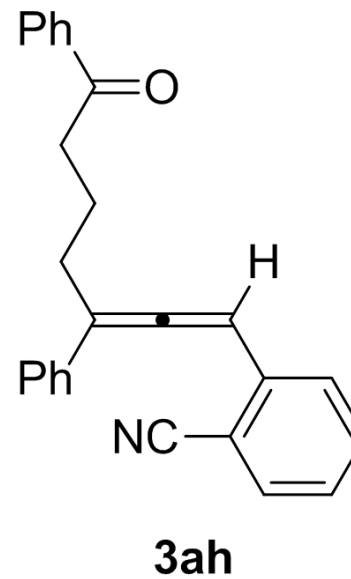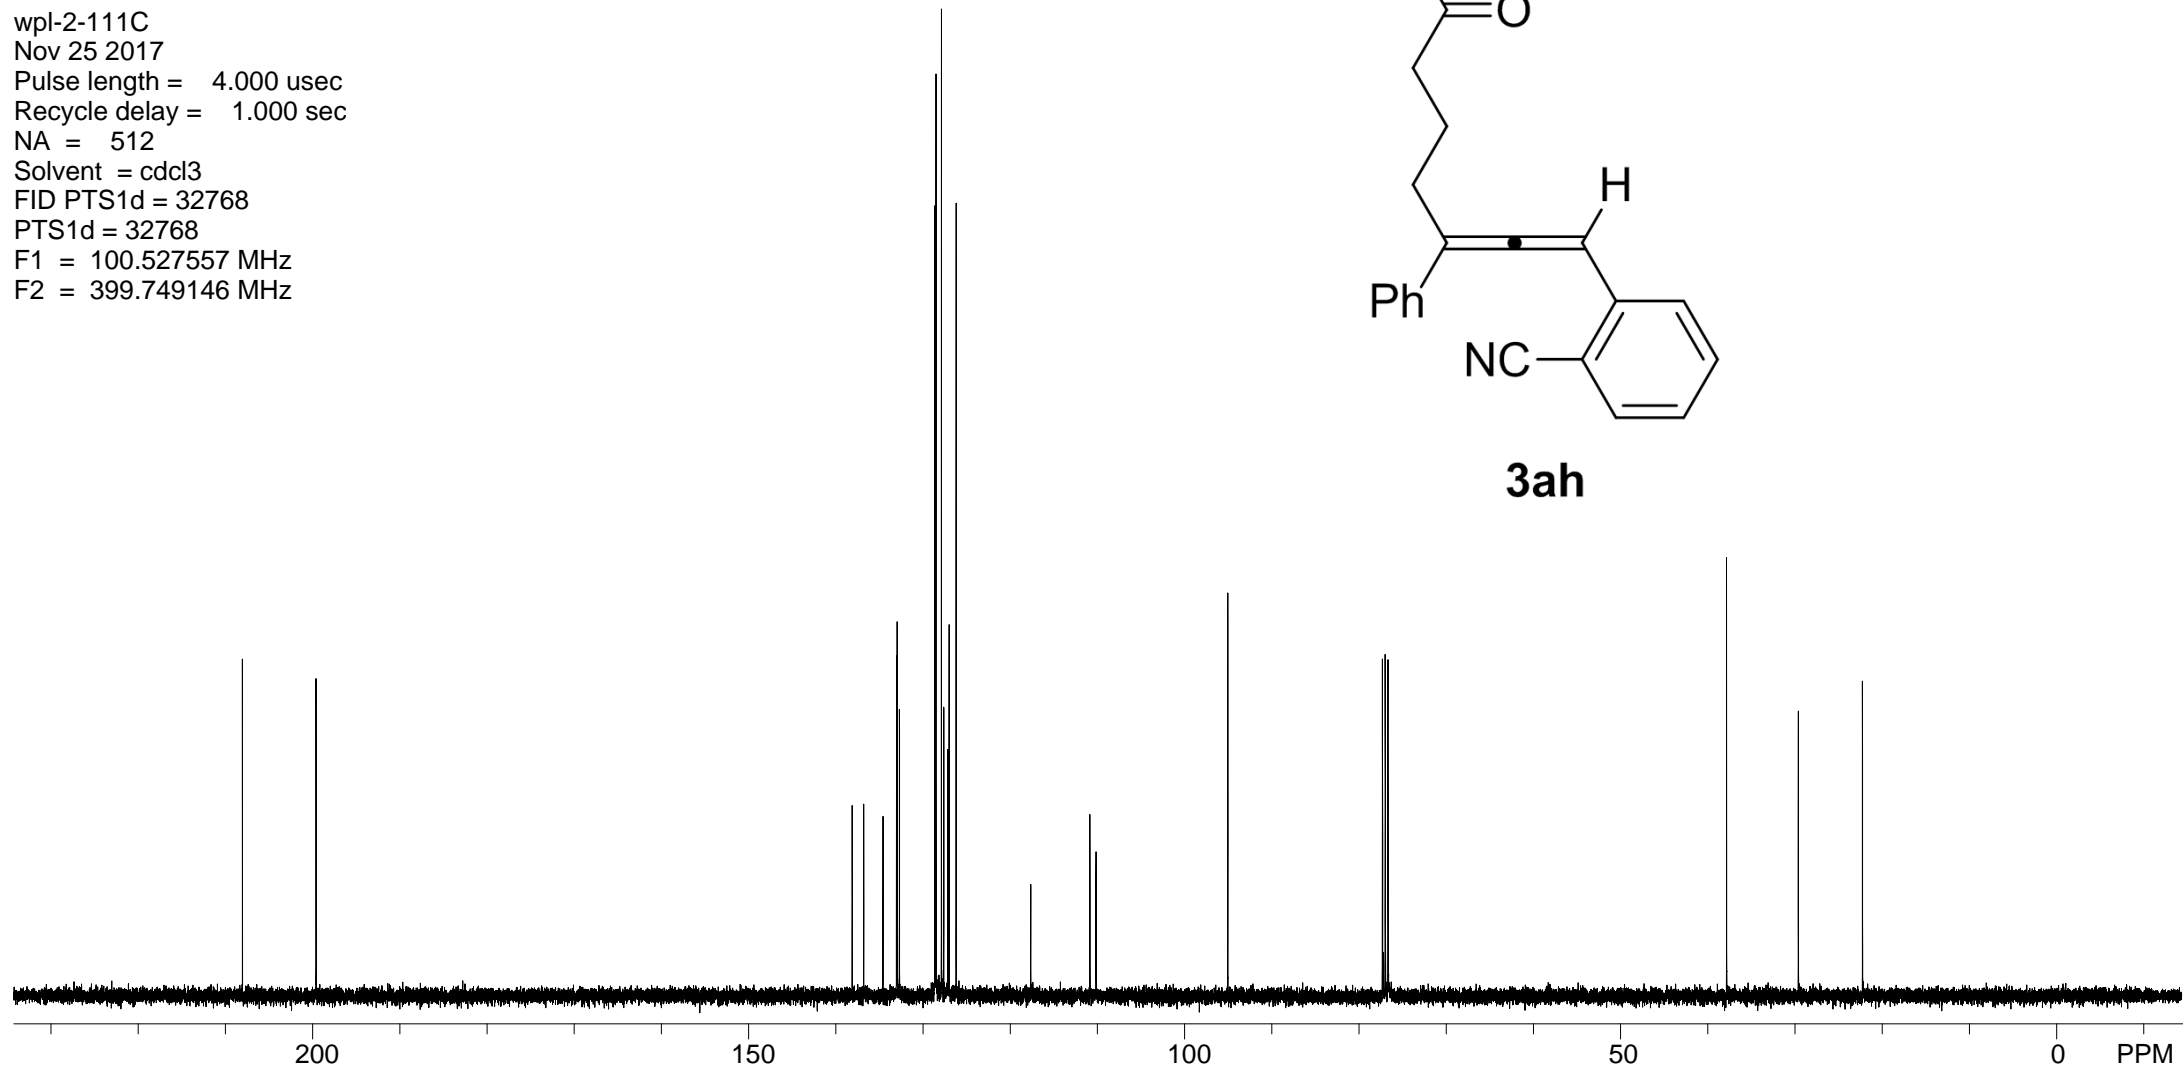

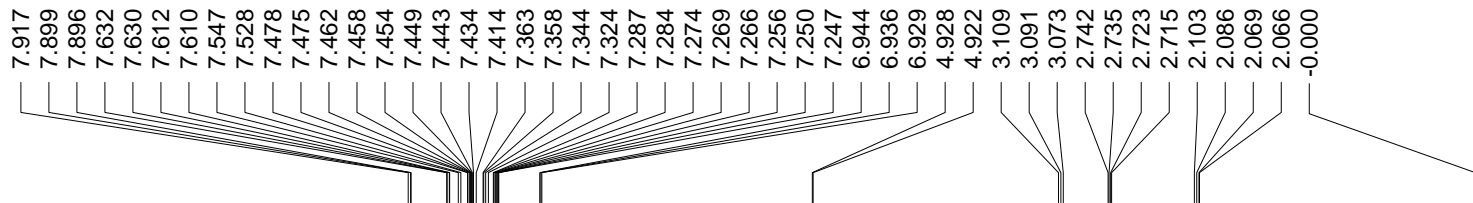

Purity was determined to be 96% by using 17.5  $\mu$ L dibromomethane as the internal standard in 35.2 mg sample

wpl-2-111P  
Nov 28 2017  
Pulse length = 3.400 usec  
Recycle delay = 20.000 sec  
NA = 4  
Solvent = cdcl3  
FID PTS1d = 16384  
PTS1d = 16384  
F1 = 399.749542 MHz  
F2 = 100.526031 MHz

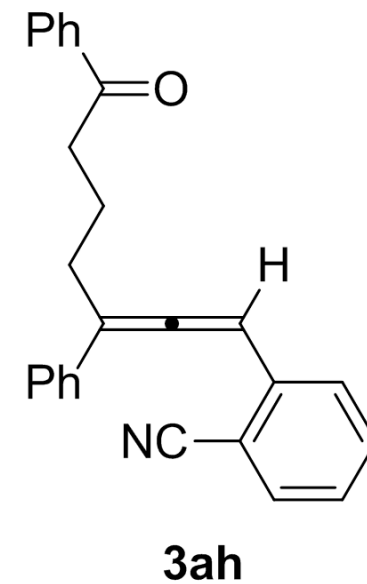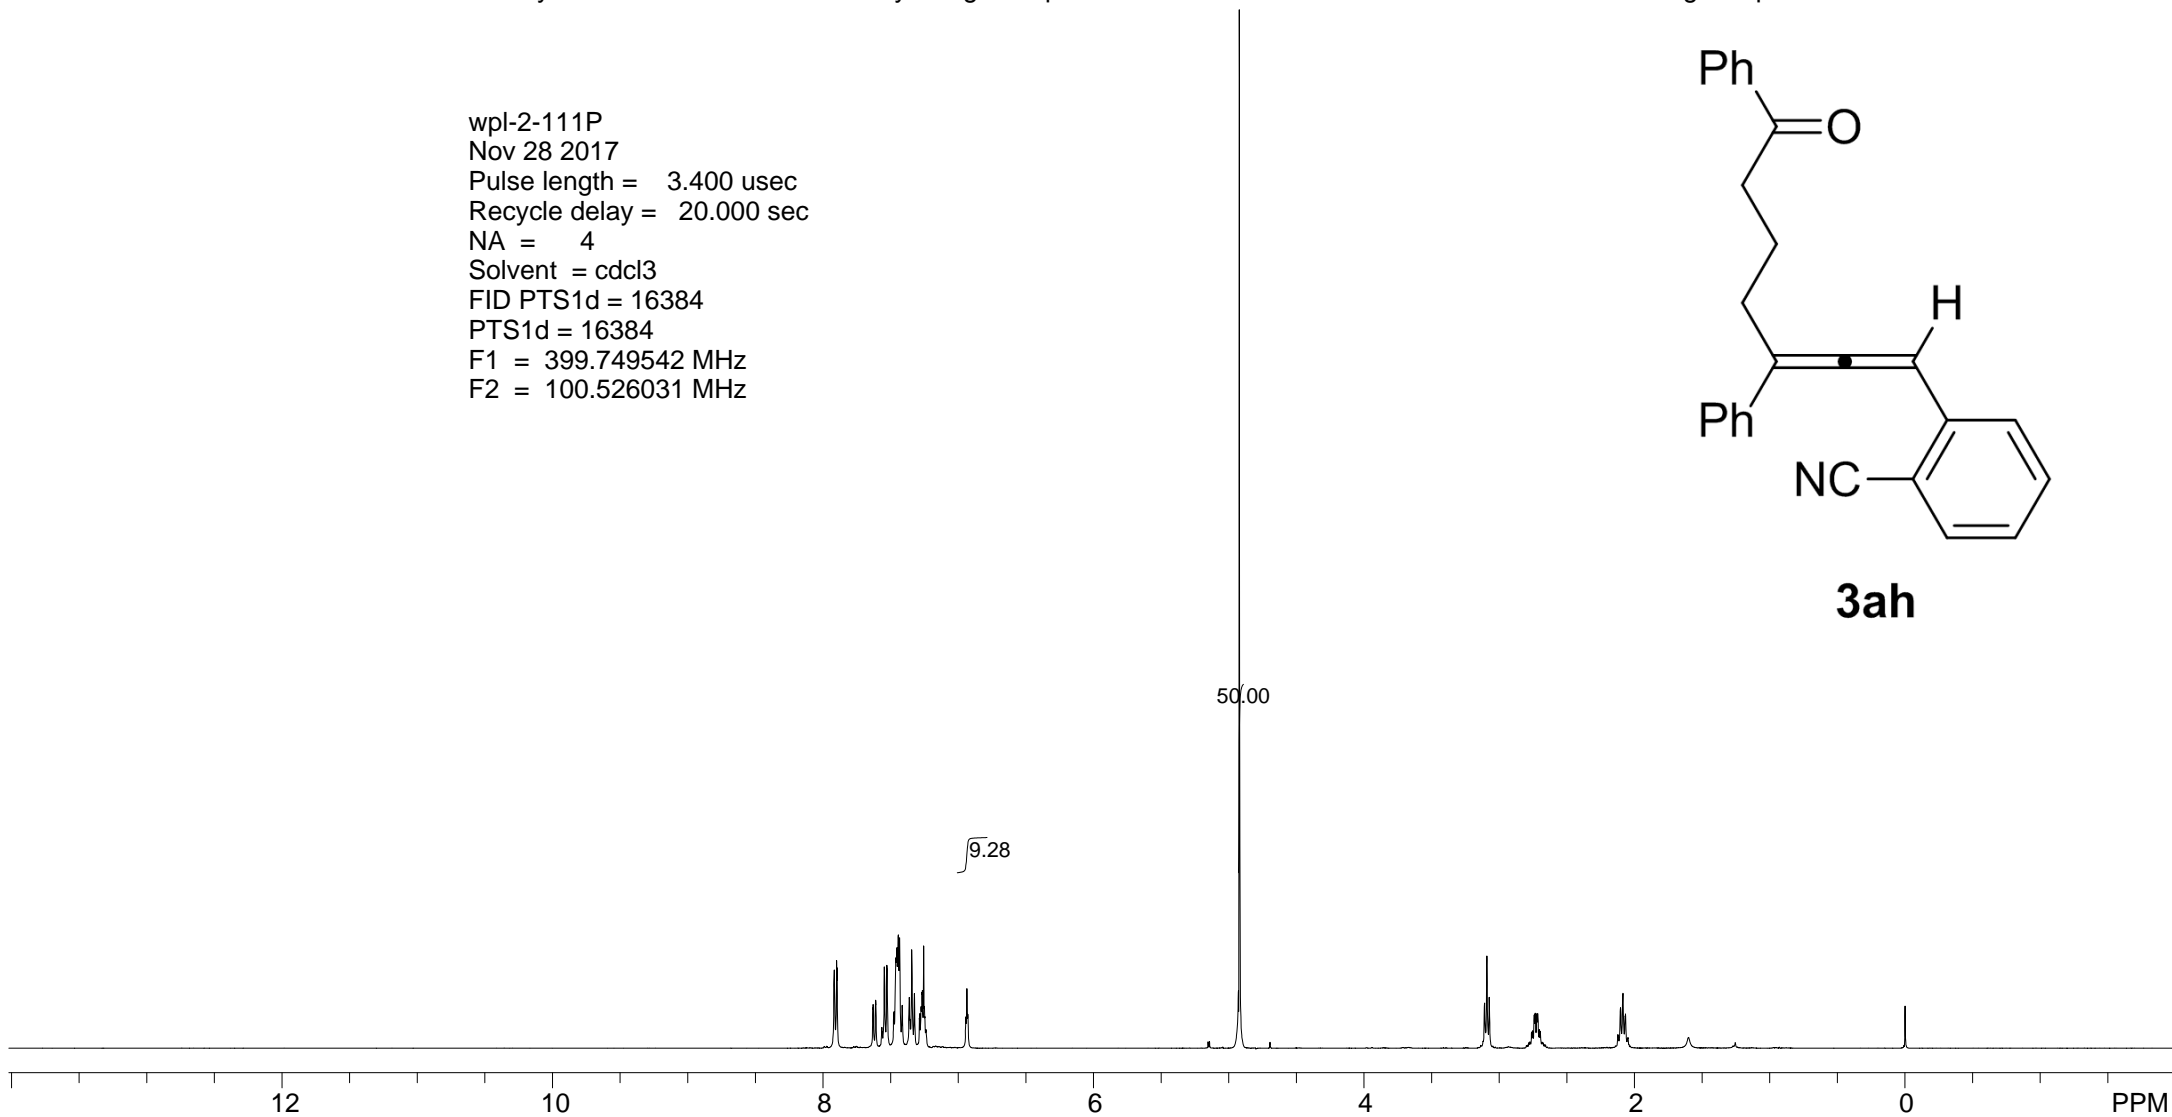

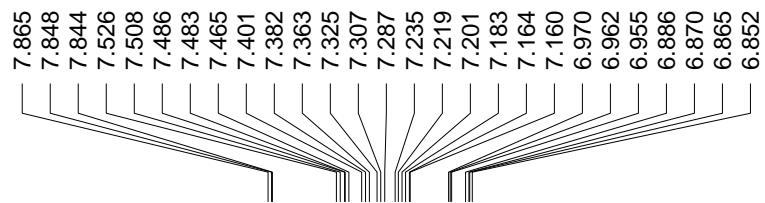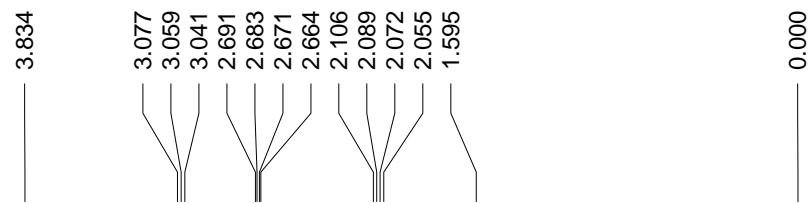

wpl-4-184H  
Pulse length = 10.000 usec  
Recycle delay = 20.000 sec  
NA = 4  
Solvent = CDCl3  
PTS1d = 65536  
F1 = 400.130005 MHz  
F2 = 1.000000 MHz

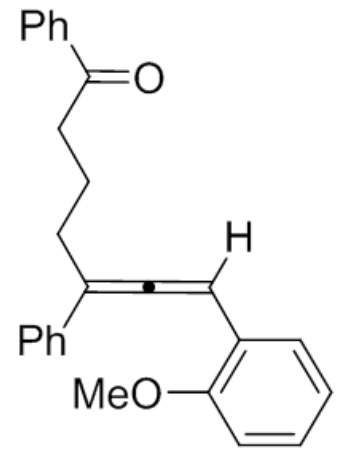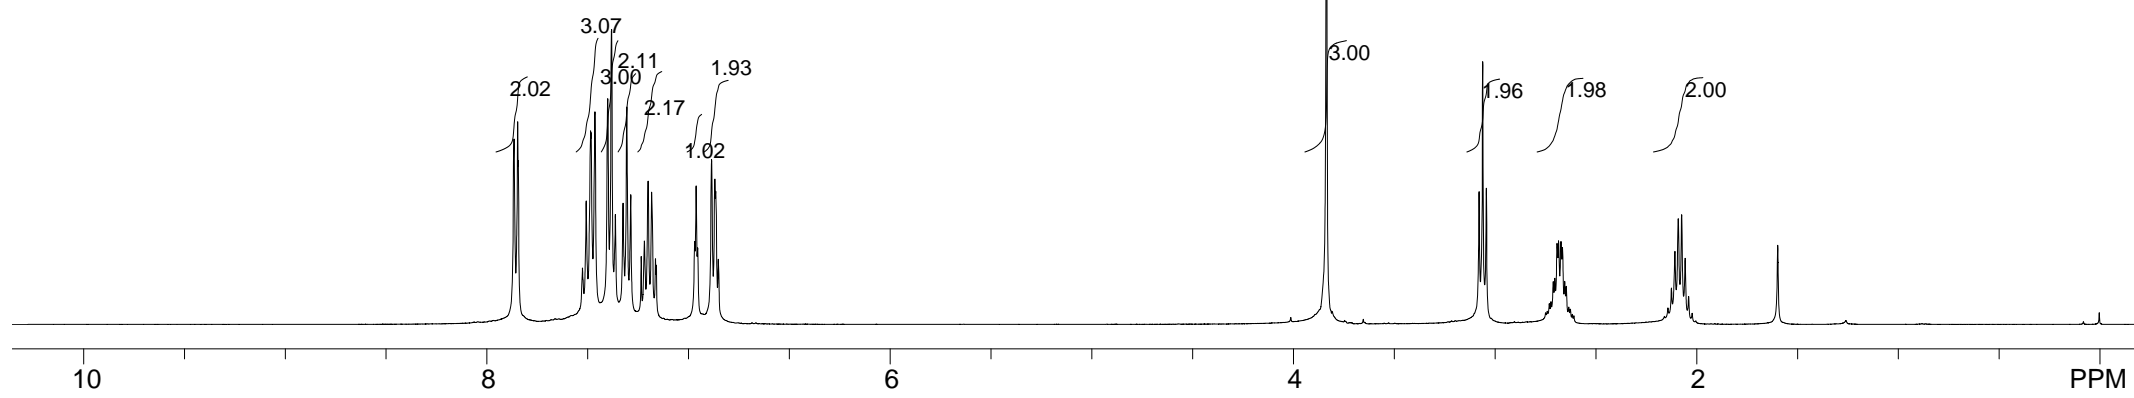

wpl-4-184C  
Pulse length = 10.000 usec  
Recycle delay = 1.000 sec  
NA = 512  
Solvent = CDCl3  
PTS1d = 32768  
F1 = 100.612770 MHz  
F2 = 1.000000 MHz

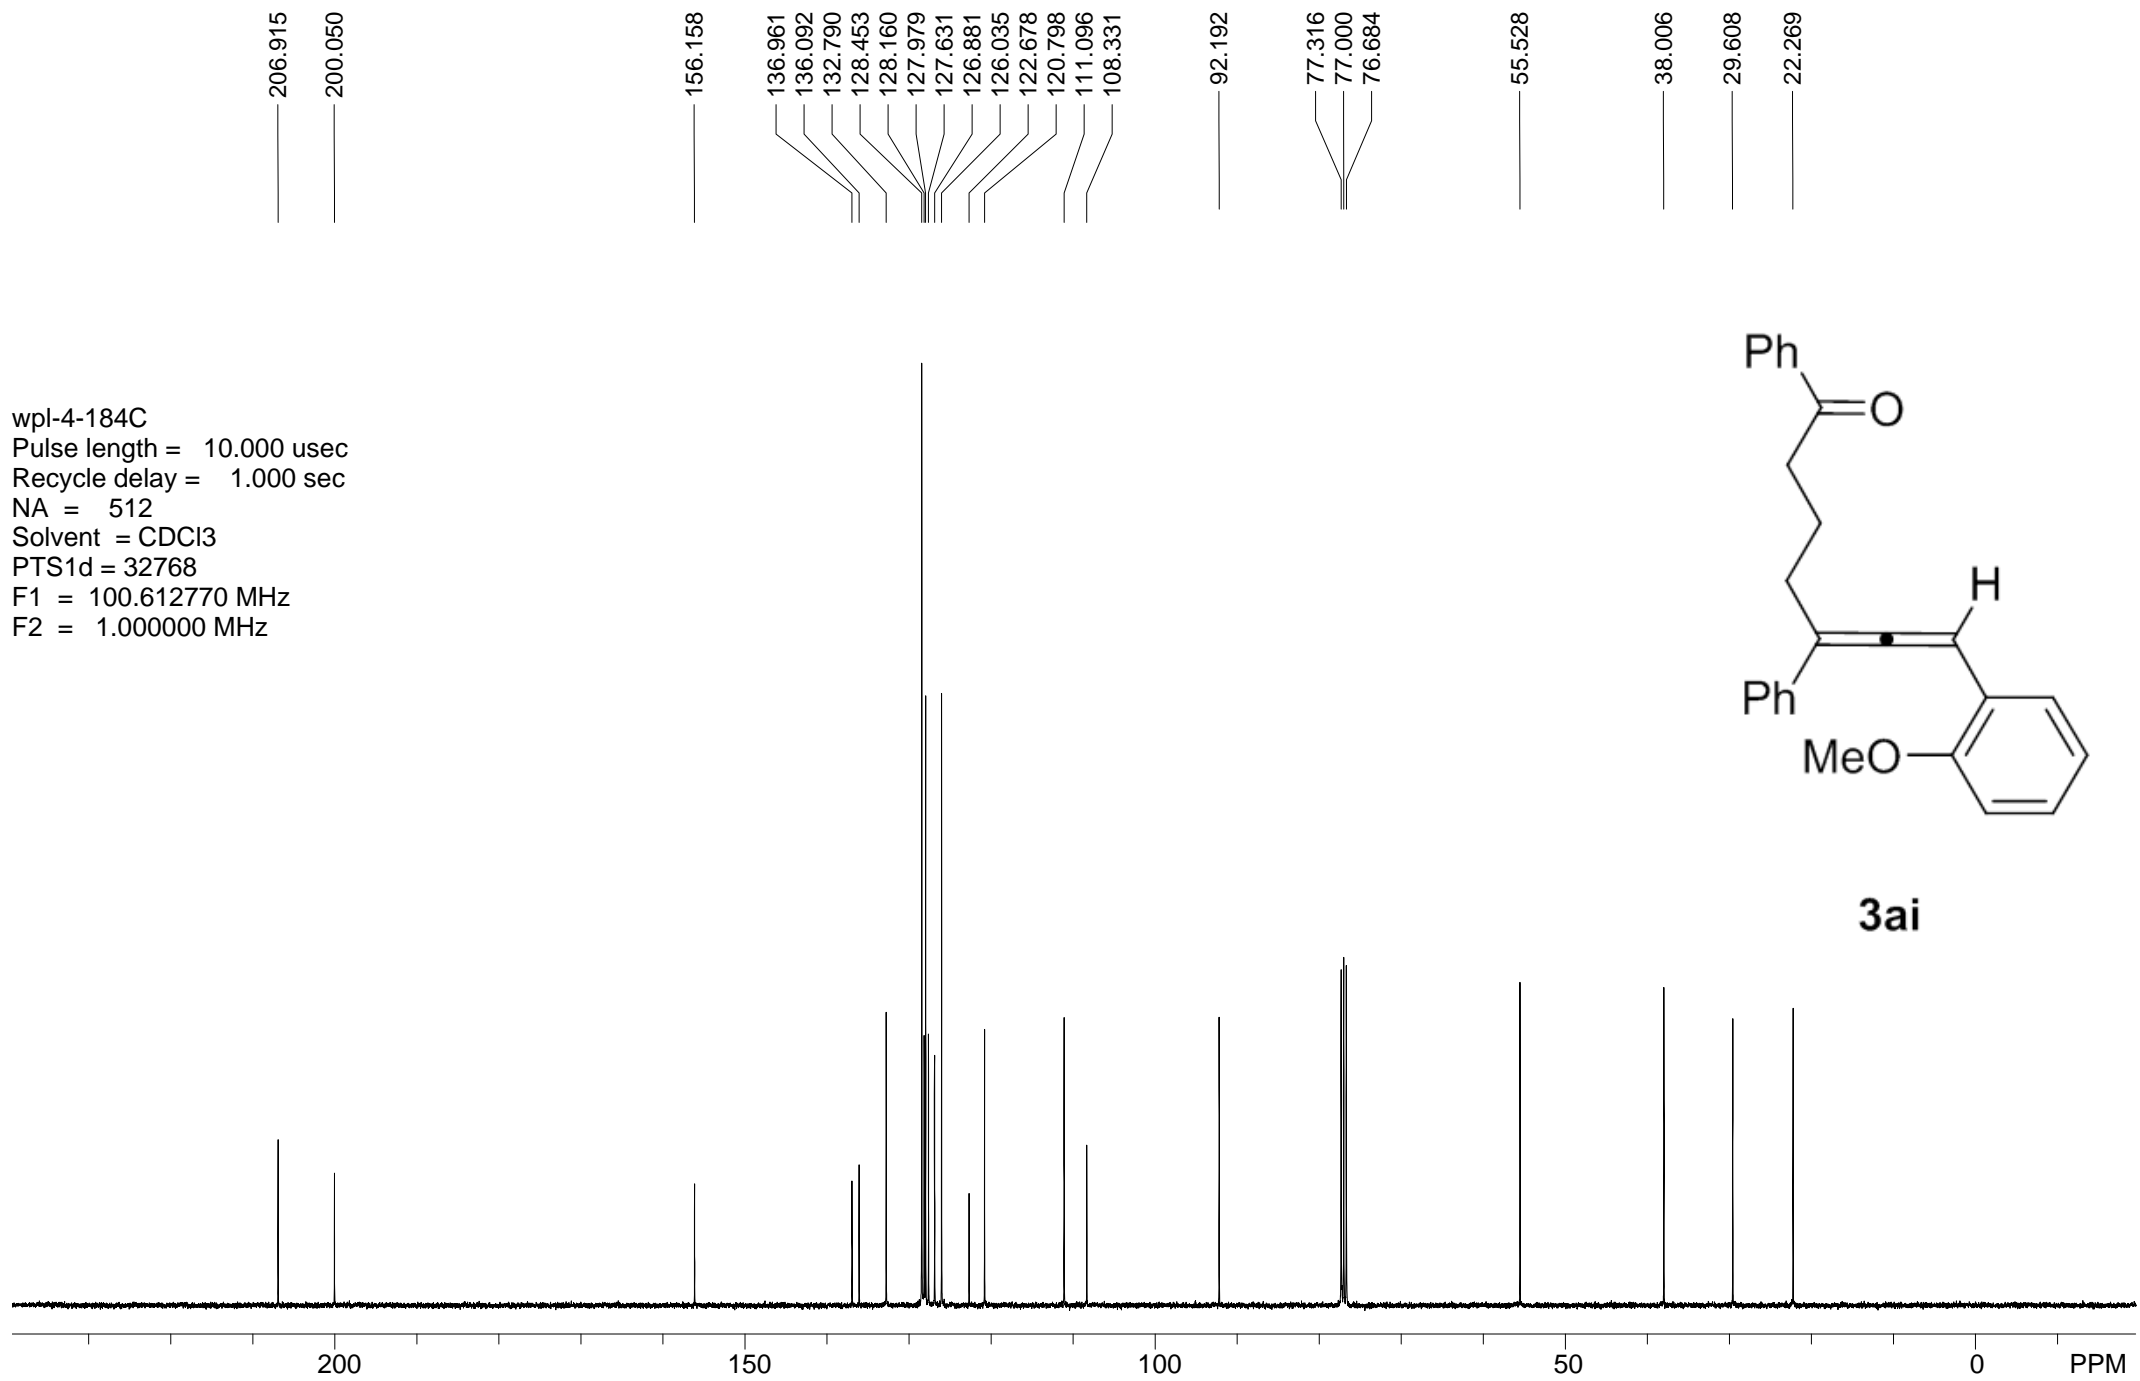

7.949  
7.931  
7.928  
7.551  
7.533  
7.515  
7.454  
7.434  
7.415  
7.394  
7.374  
7.305  
7.286  
7.266  
7.236  
7.175  
7.156  
7.137

3.083  
3.078  
3.066  
3.060  
3.047  
3.042  
2.535  
2.517  
2.499  
2.064  
2.047  
2.027  
2.011  
1.994  
1.975  
1.957  
1.777  
1.593  
1.509  
1.491  
1.473  
1.455  
0.924  
0.905  
0.887  
0.000

wpl-2-128H  
Dec 12 2017  
Pulse length = 3.400 usec  
Recycle delay = 20.000 sec  
NA = 4  
Solvent = cdcl3  
FID PTS1d = 16384  
PTS1d = 16384  
F1 = 399.749542 MHz  
F2 = 100.526031 MHz

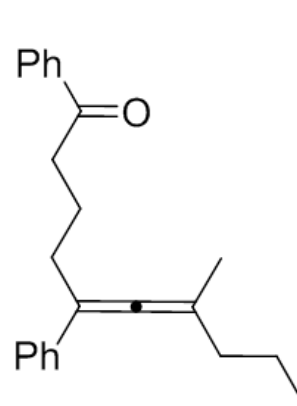

**3aj**

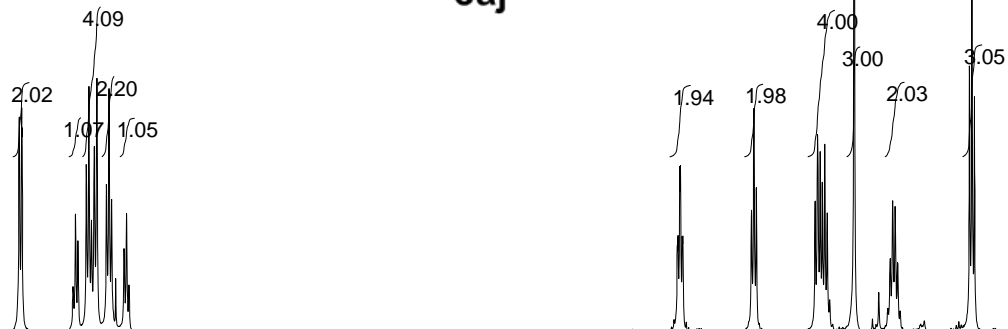

12

10

8

6

4

2

0

PPM



wpl-3-128C  
Dec 12 2017  
Pulse length = 4.000 usec  
Recycle delay = 1.000 sec  
NA = 512  
Solvent = cdcl3  
FID PTS1d = 32768  
PTS1d = 32768  
F1 = 100.527557 MHz  
F2 = 399.749146 MHz

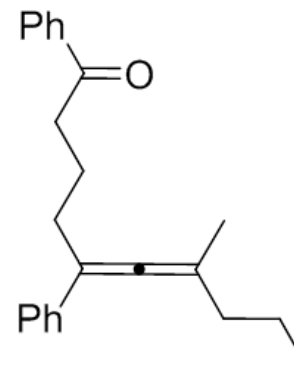

3aj

201.377  
200.223

138.050  
137.063  
132.843  
128.509  
128.220  
127.962  
126.125  
125.852

103.863  
103.157

77.319  
77.000  
76.681

38.137  
36.528

29.742

22.493  
20.983  
18.903  
13.992

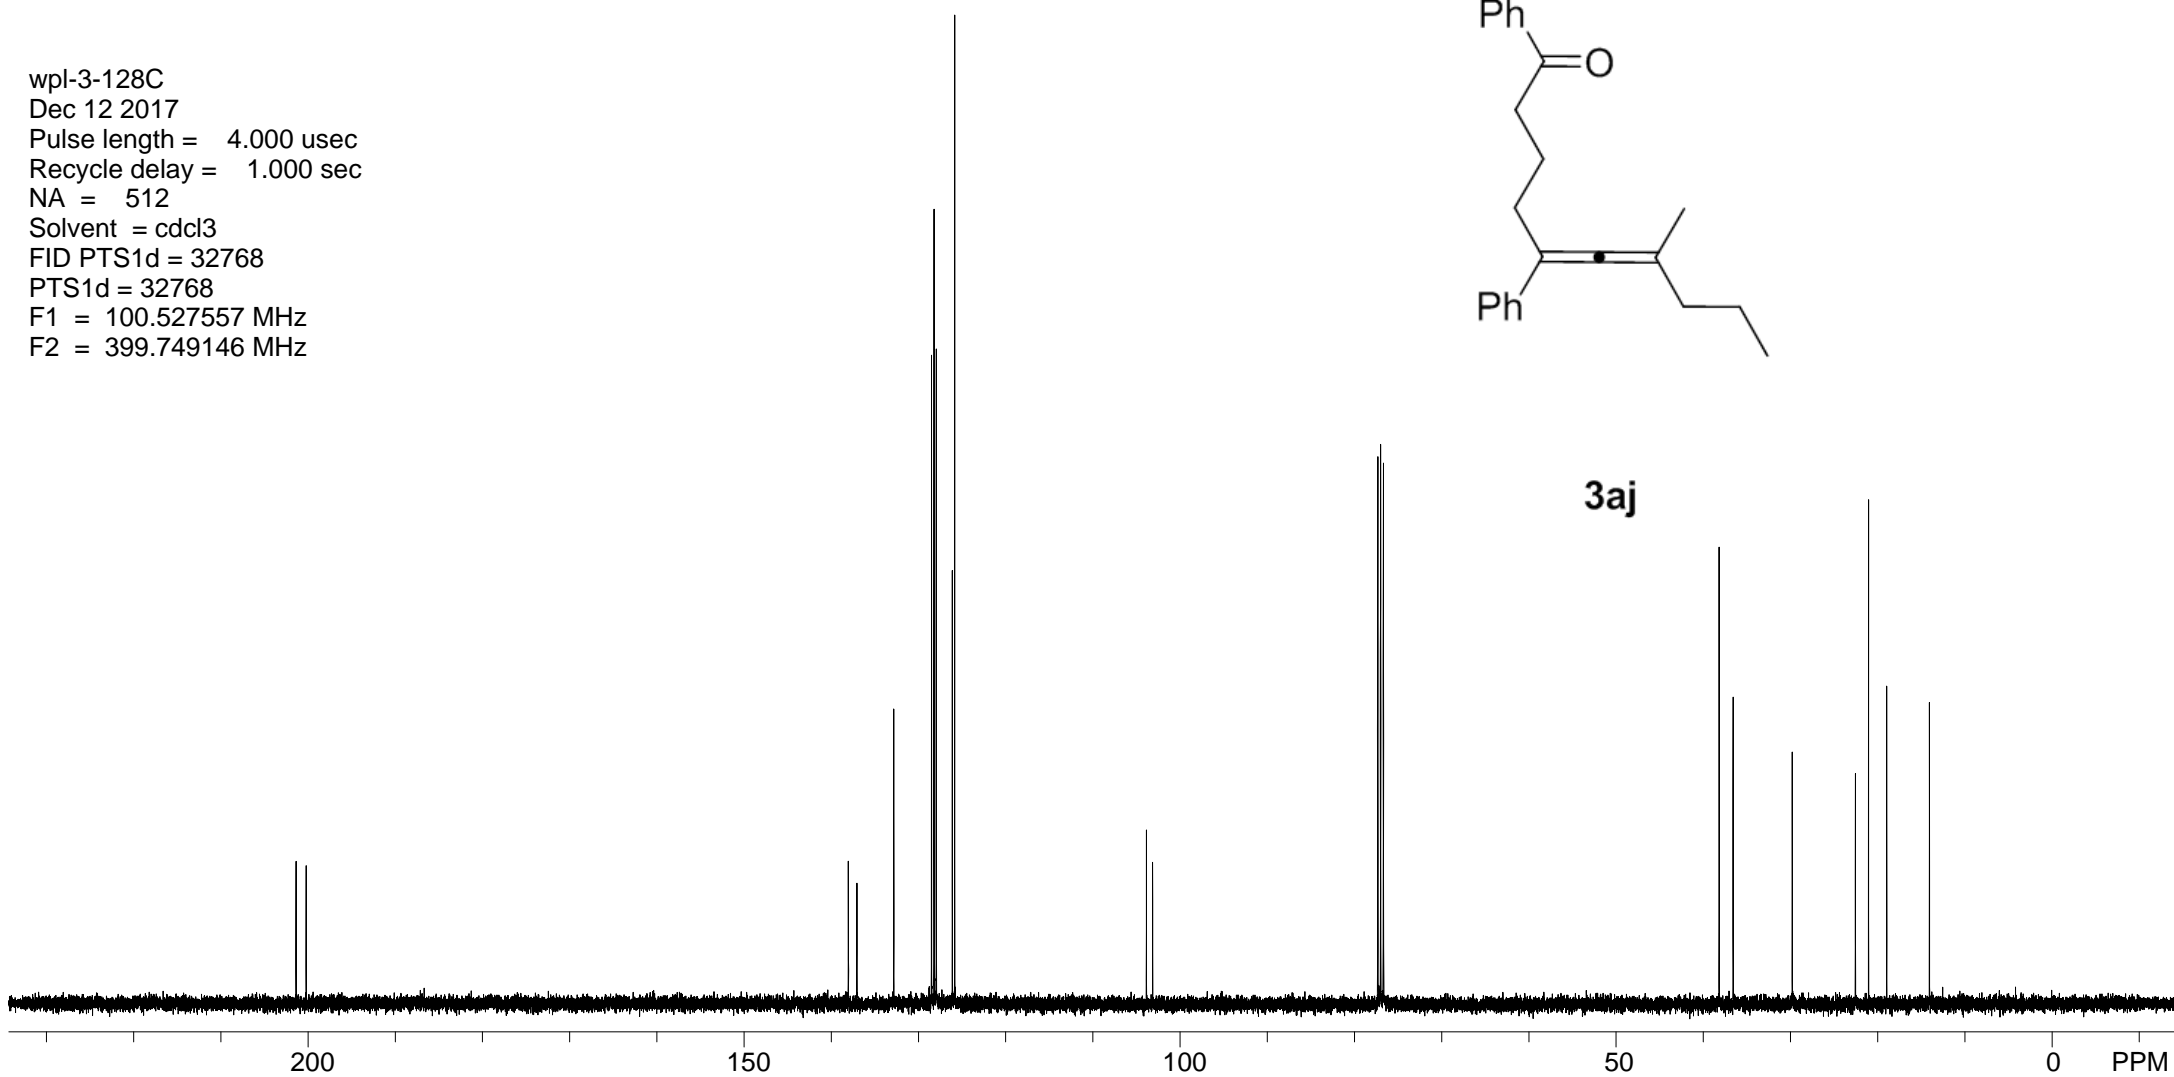

wpl-4-182H  
 Pulse length = 10.000 usec  
 Recycle delay = 20.000 sec  
 NA = 4  
 Solvent = CDCl3  
 PTS1d = 65536  
 F1 = 400.130005 MHz  
 F2 = 1.000000 MHz

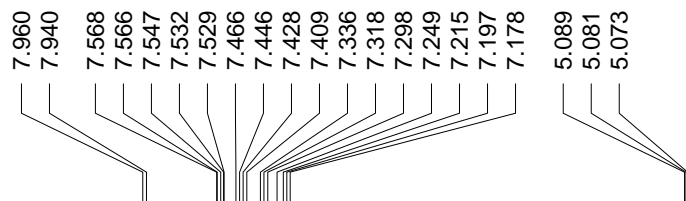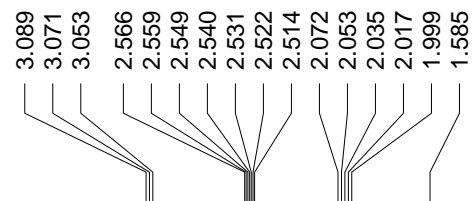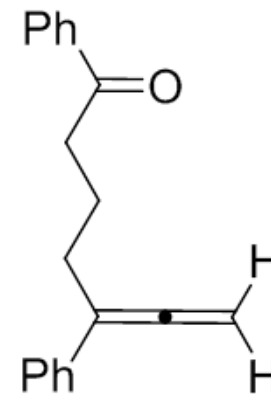

**3ak**

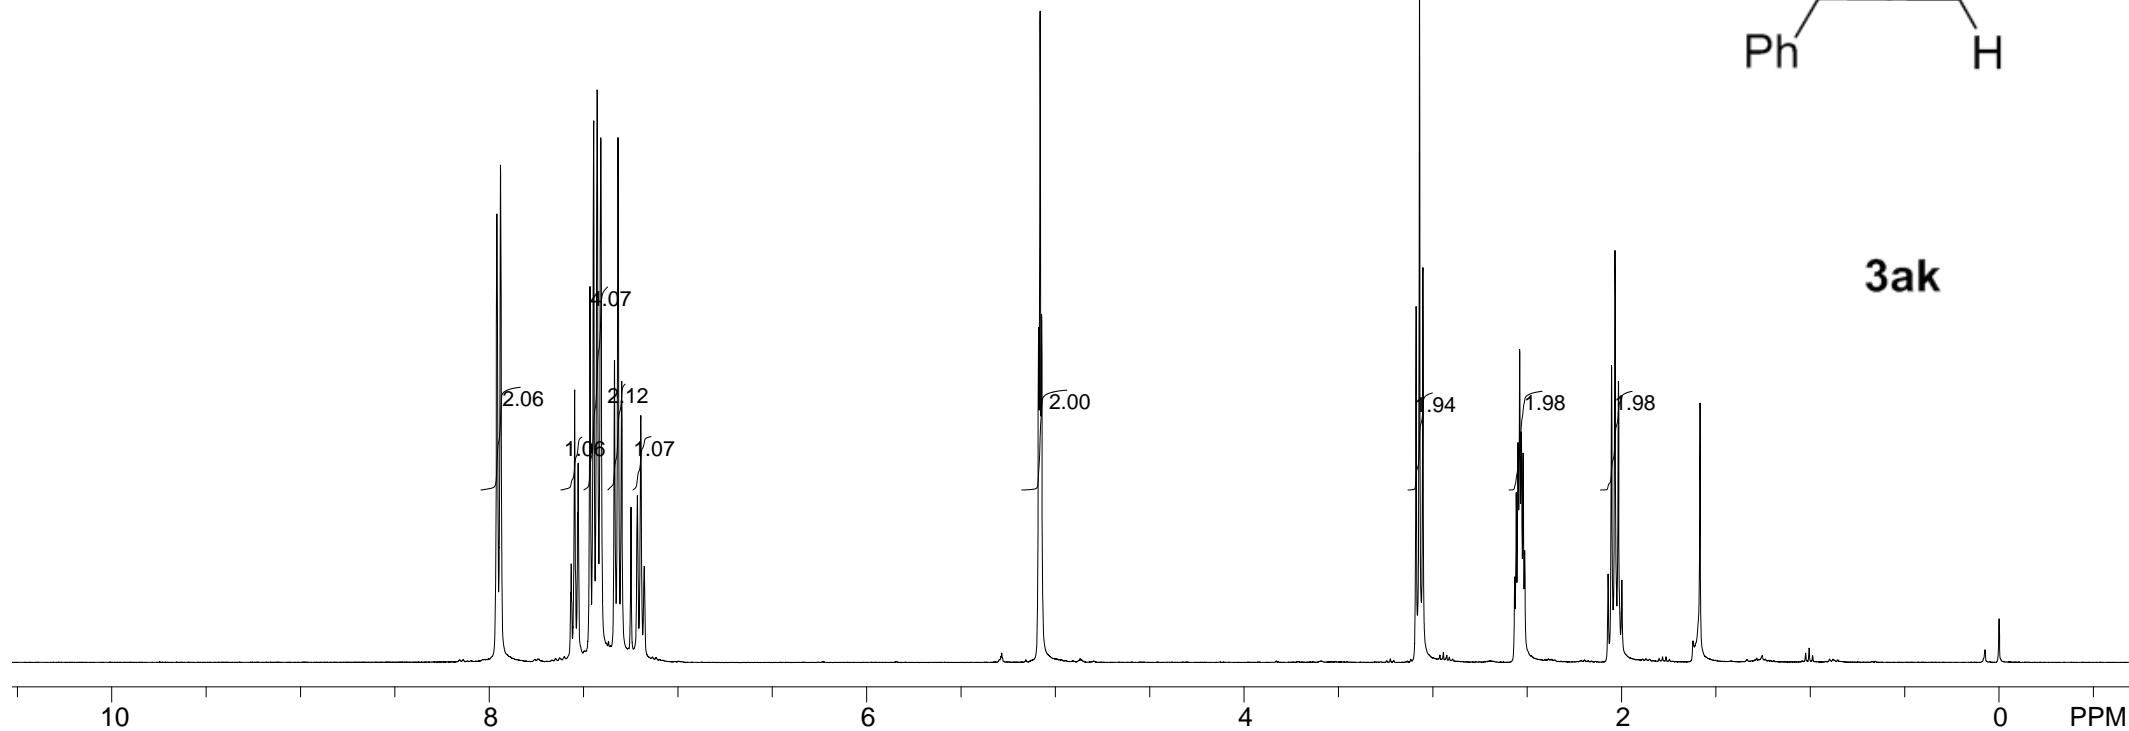

wpl-4-182C  
Pulse length = 10.000 usec  
Recycle delay = 1.000 sec  
NA = 512  
Solvent = CDCl3  
PTS1d = 32768  
F1 = 100.612770 MHz  
F2 = 1.000000 MHz

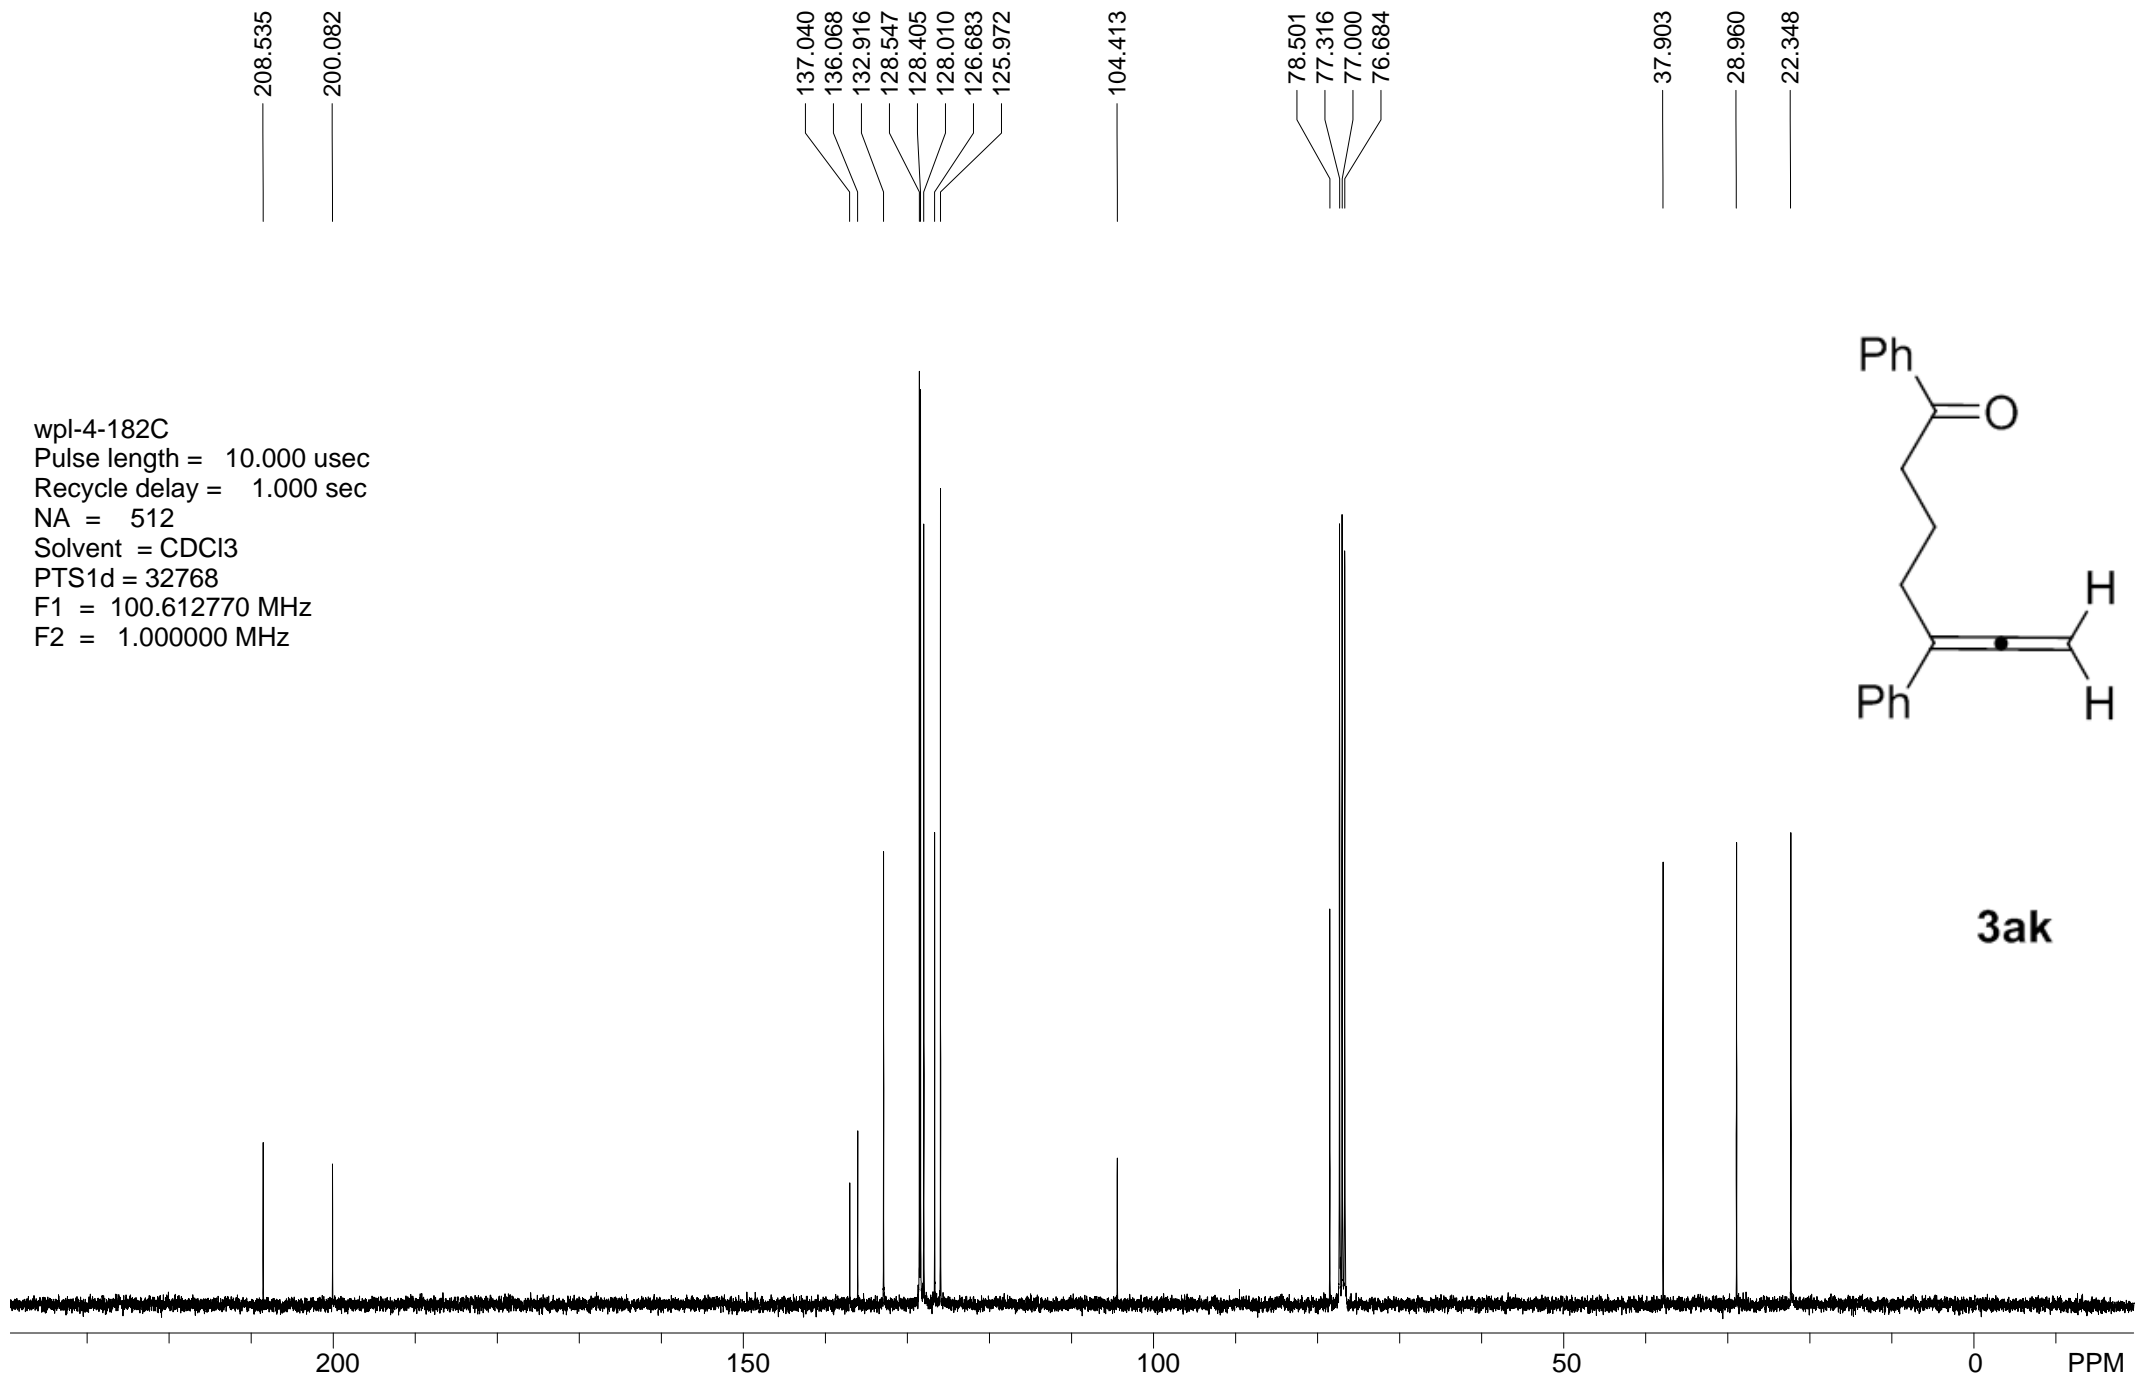

7.858  
7.839  
7.534  
7.516  
7.498  
7.455  
7.436  
7.412  
7.393  
7.374  
7.334  
7.315  
7.296  
7.234  
7.221  
7.203  
6.511  
6.504  
6.497  
3.059  
3.041  
3.024  
2.705  
2.697  
2.686  
2.679  
2.667  
2.648  
2.093  
2.075  
2.069  
2.057  
2.051  
2.033  
1.668  
-0.000

wpl-2-117H  
Pulse length = 10.000 usec  
Recycle delay = 5.000 sec  
NA = 4  
Solvent = CDCl3  
PTS1d = 65536  
F1 = 400.130035 MHz  
F2 = 1.000000 MHz

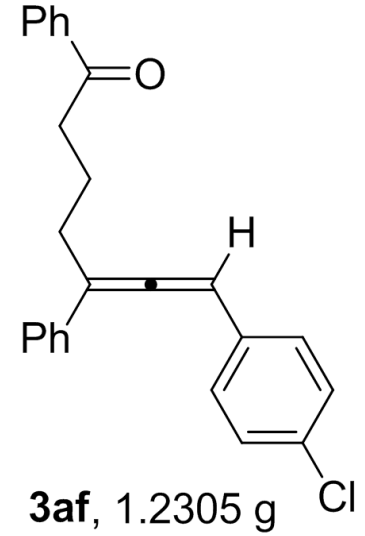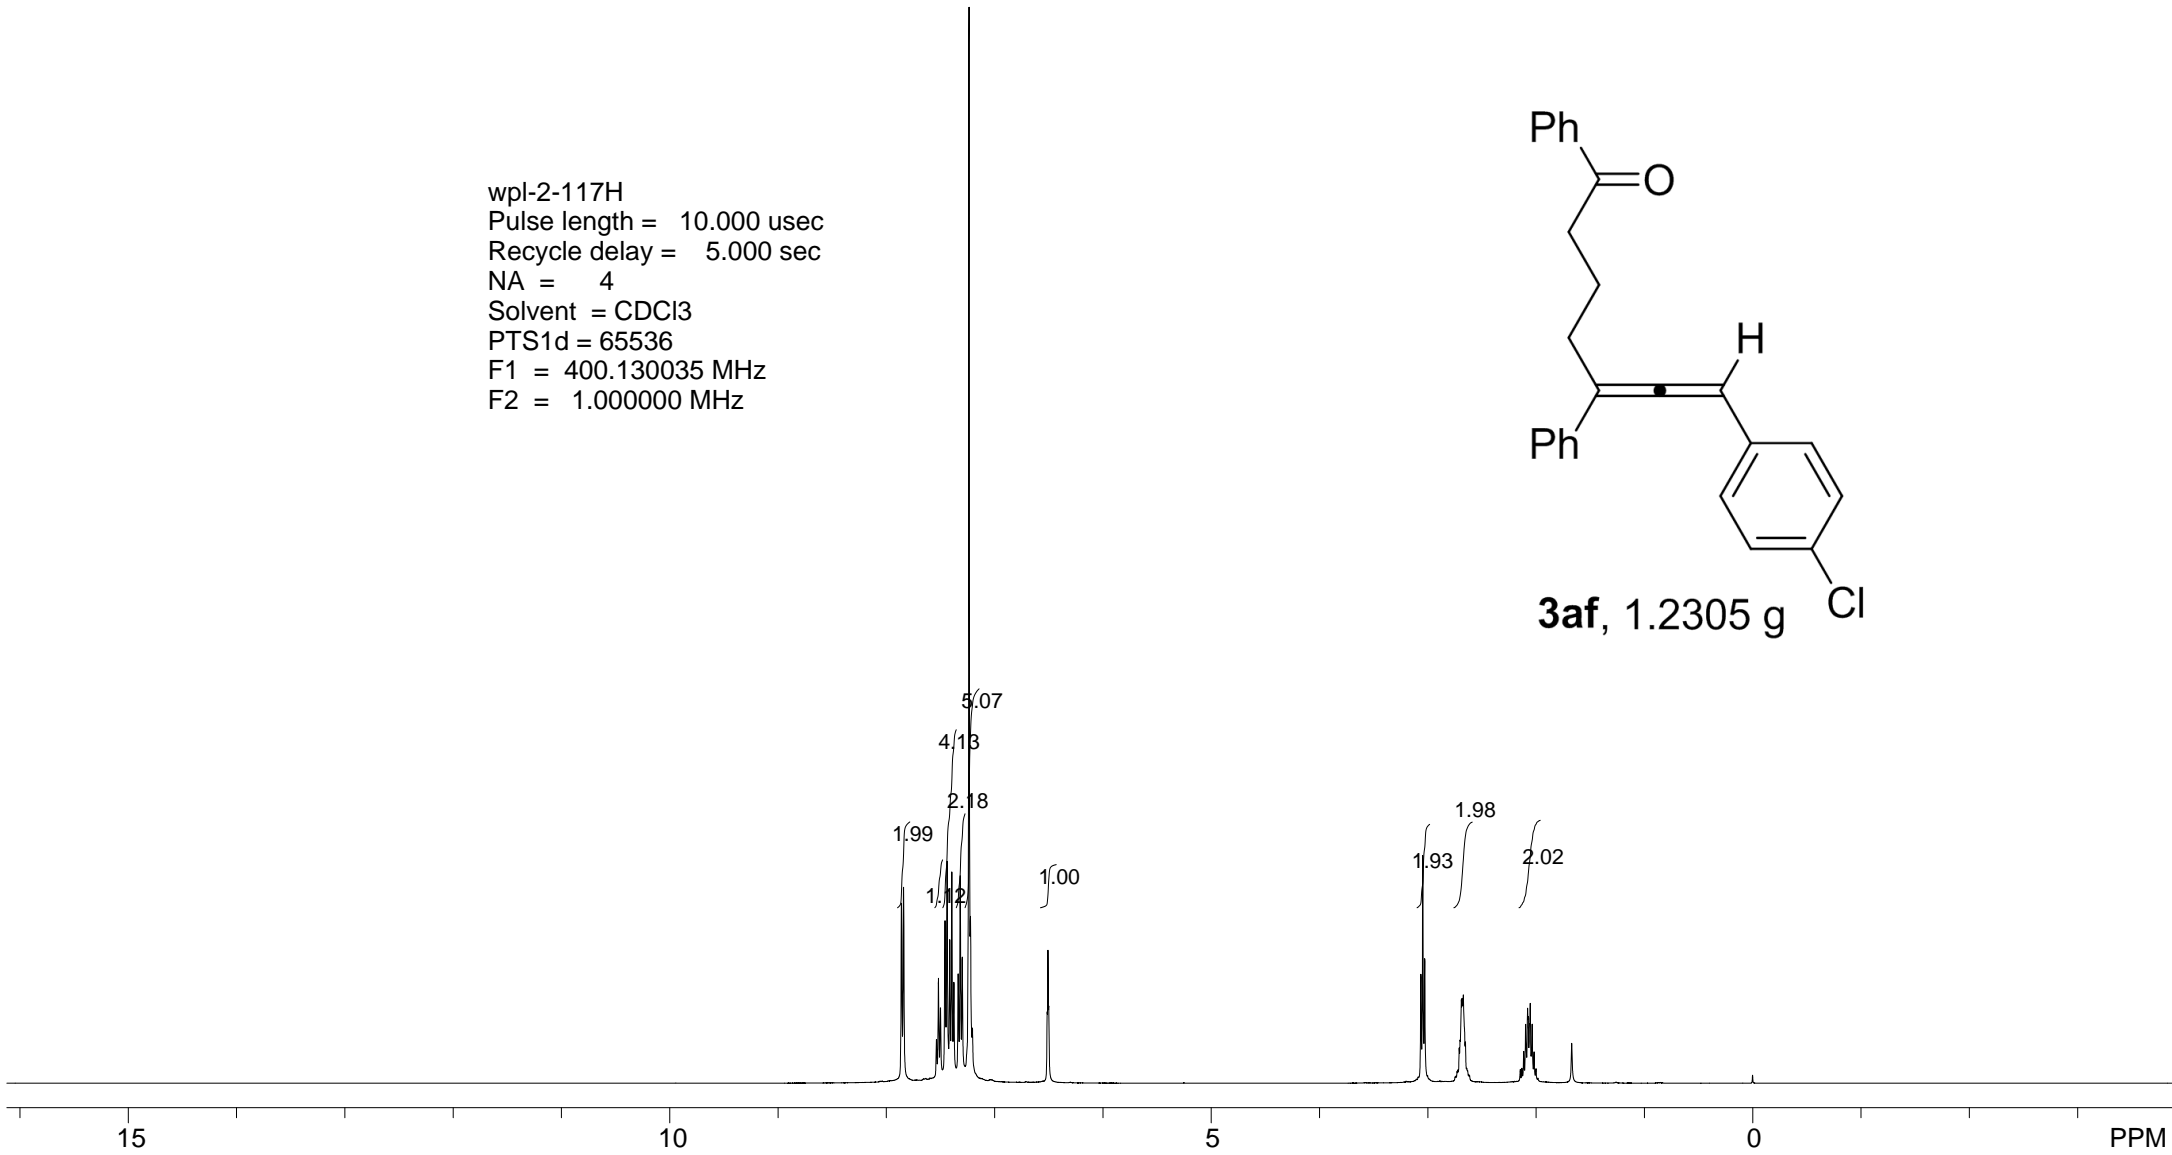

206.528

199.726

136.842

135.389

132.900

132.632

128.856

128.563

128.468

127.884

127.307

126.043

109.738

97.342

77.316

77.000

76.676

37.840

29.505

22.095

wpl-2-117C  
Pulse length = 10.000 usec  
Recycle delay = 21.000 sec  
NA = 512  
Solvent = CDCl<sub>3</sub>  
PTS1d = 32768  
F1 = 100.612770 MHz  
F2 = 1.000000 MHz

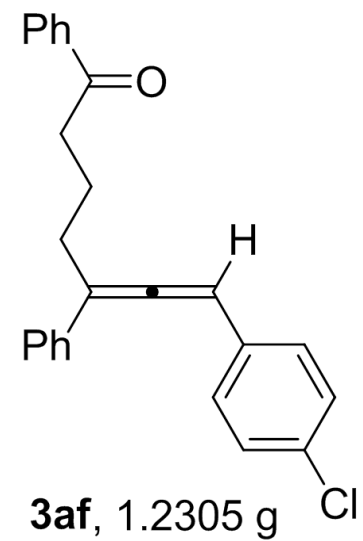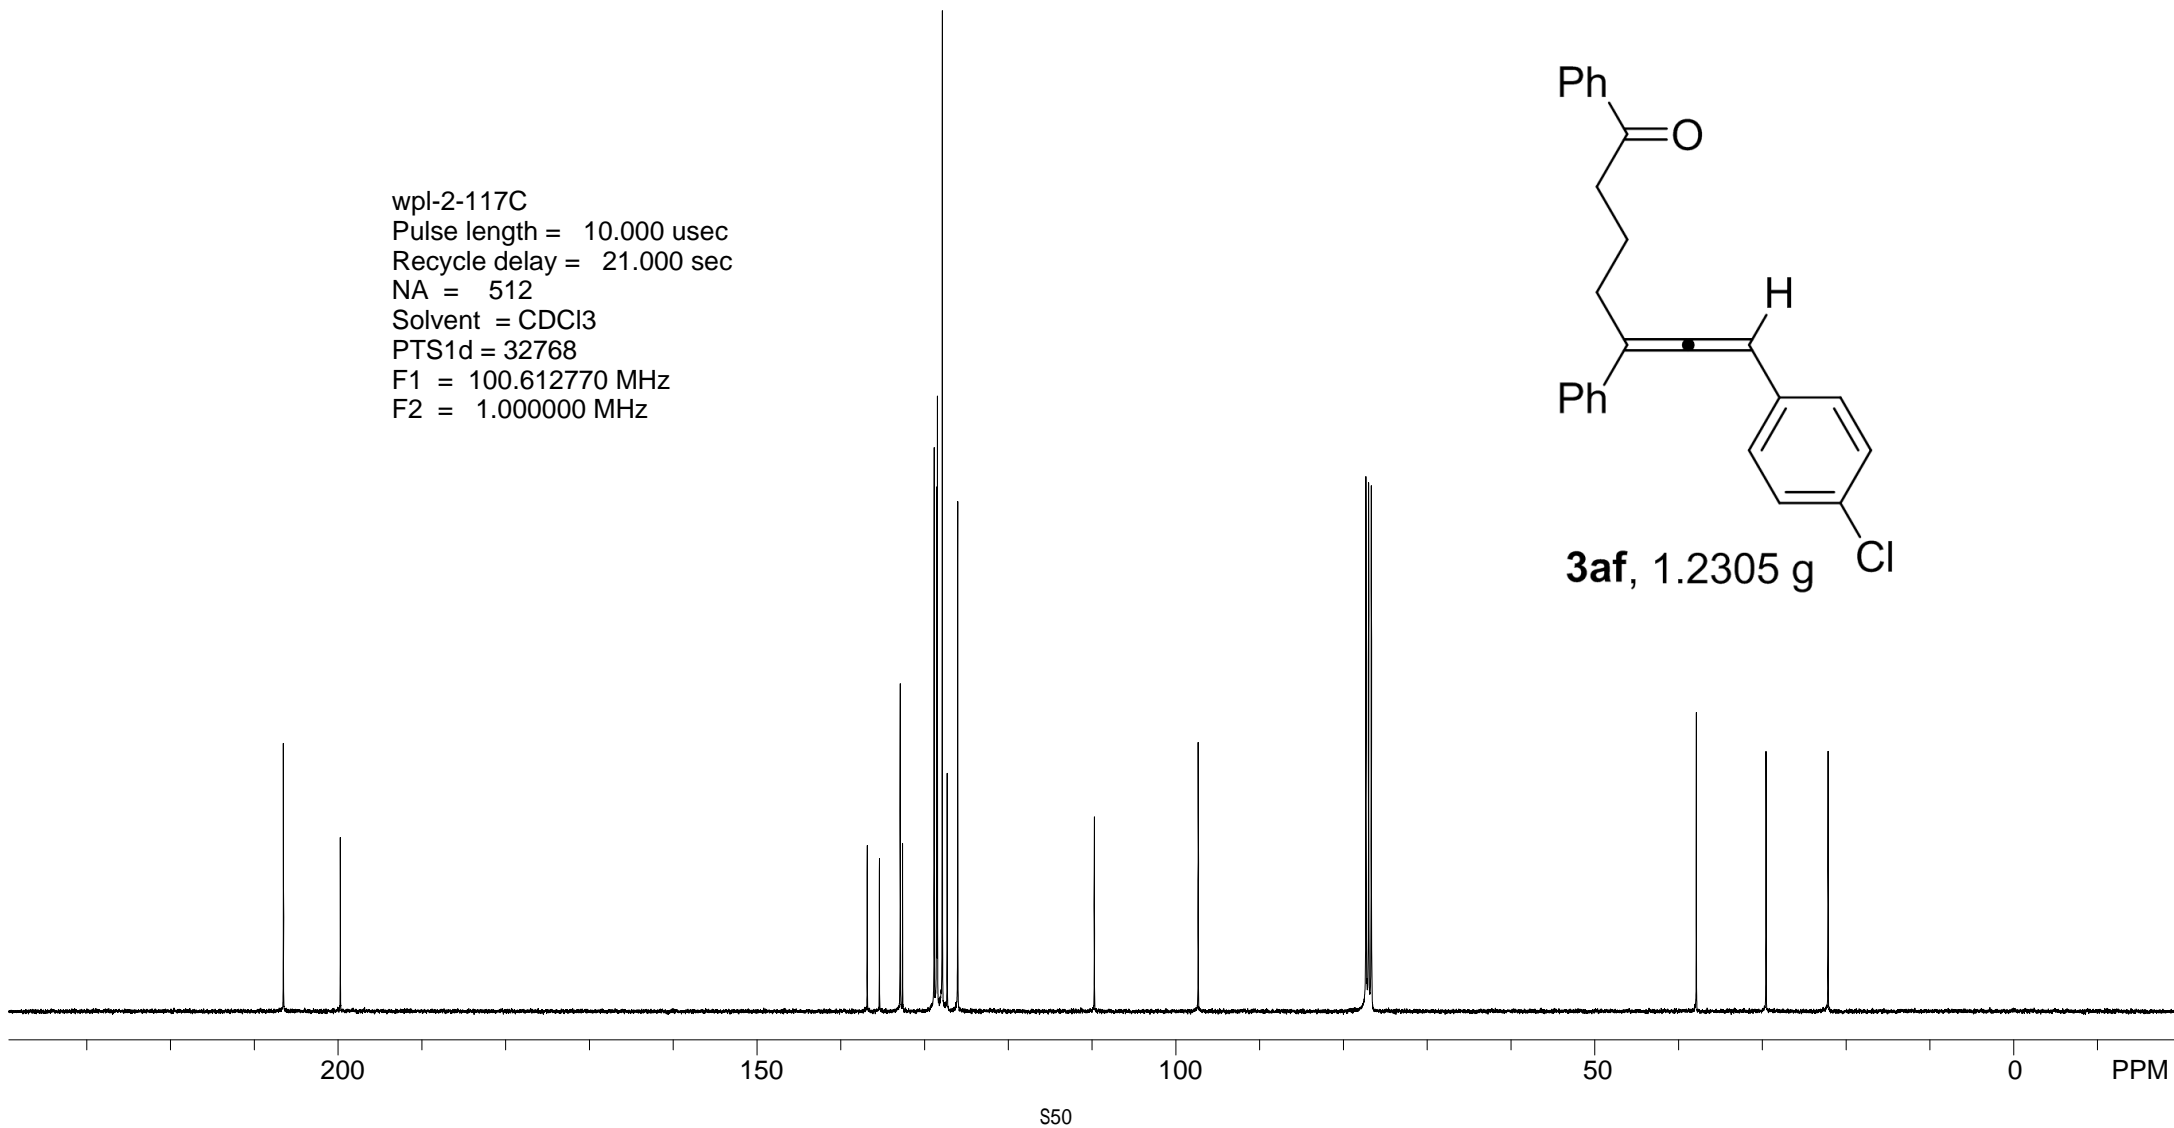

206.488  
199.619

136.789  
135.338  
132.880  
132.851  
132.574  
128.811  
128.534  
128.417  
127.856  
127.834  
127.265  
126.004  
109.706  
97.309

77.321  
77.000  
76.686

37.782  
29.447  
22.046

wpl-2-26C d1  
Pulse length = 10.000 usec  
Recycle delay = 25.000 sec  
NA = 300  
Solvent = CDCl3  
PTS1d = 32768  
F1 = 100.612770 MHz  
F2 = 1.000000 MHz

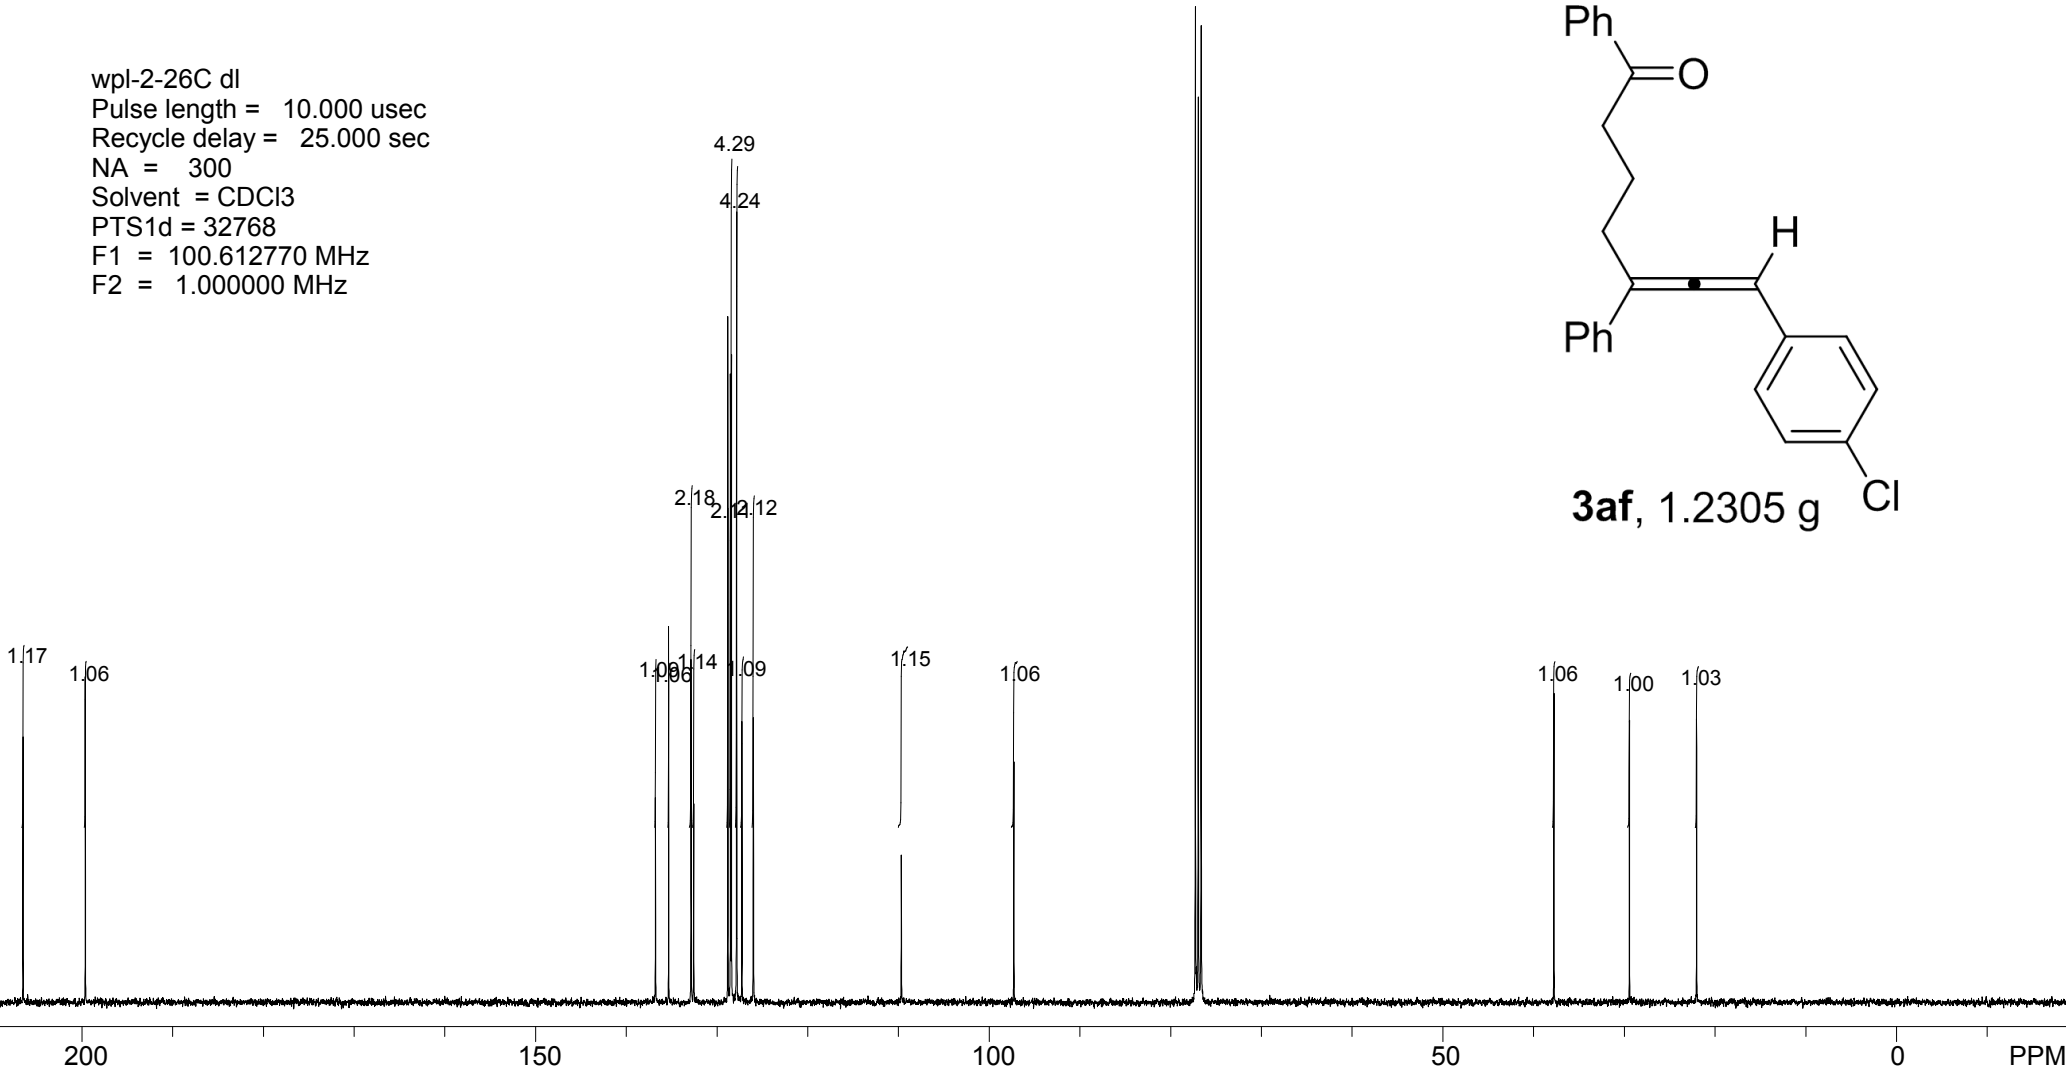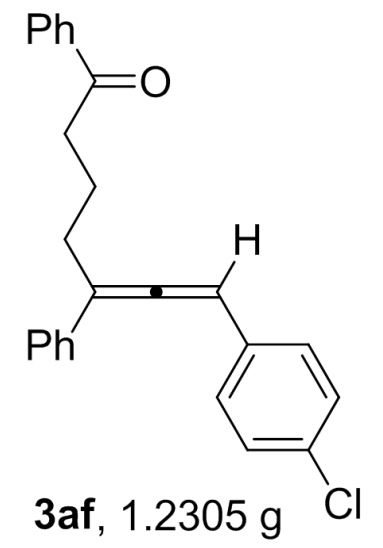

wpl-2-26C dl  
Pulse length = 10.000 usec  
Recycle delay = 25.000 sec  
NA = 300  
Solvent = CDCl3  
PTS1d = 32768  
F1 = 100.612770 MHz  
F2 = 1.000000 MHz

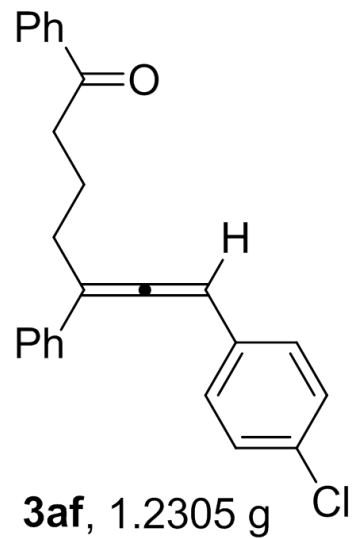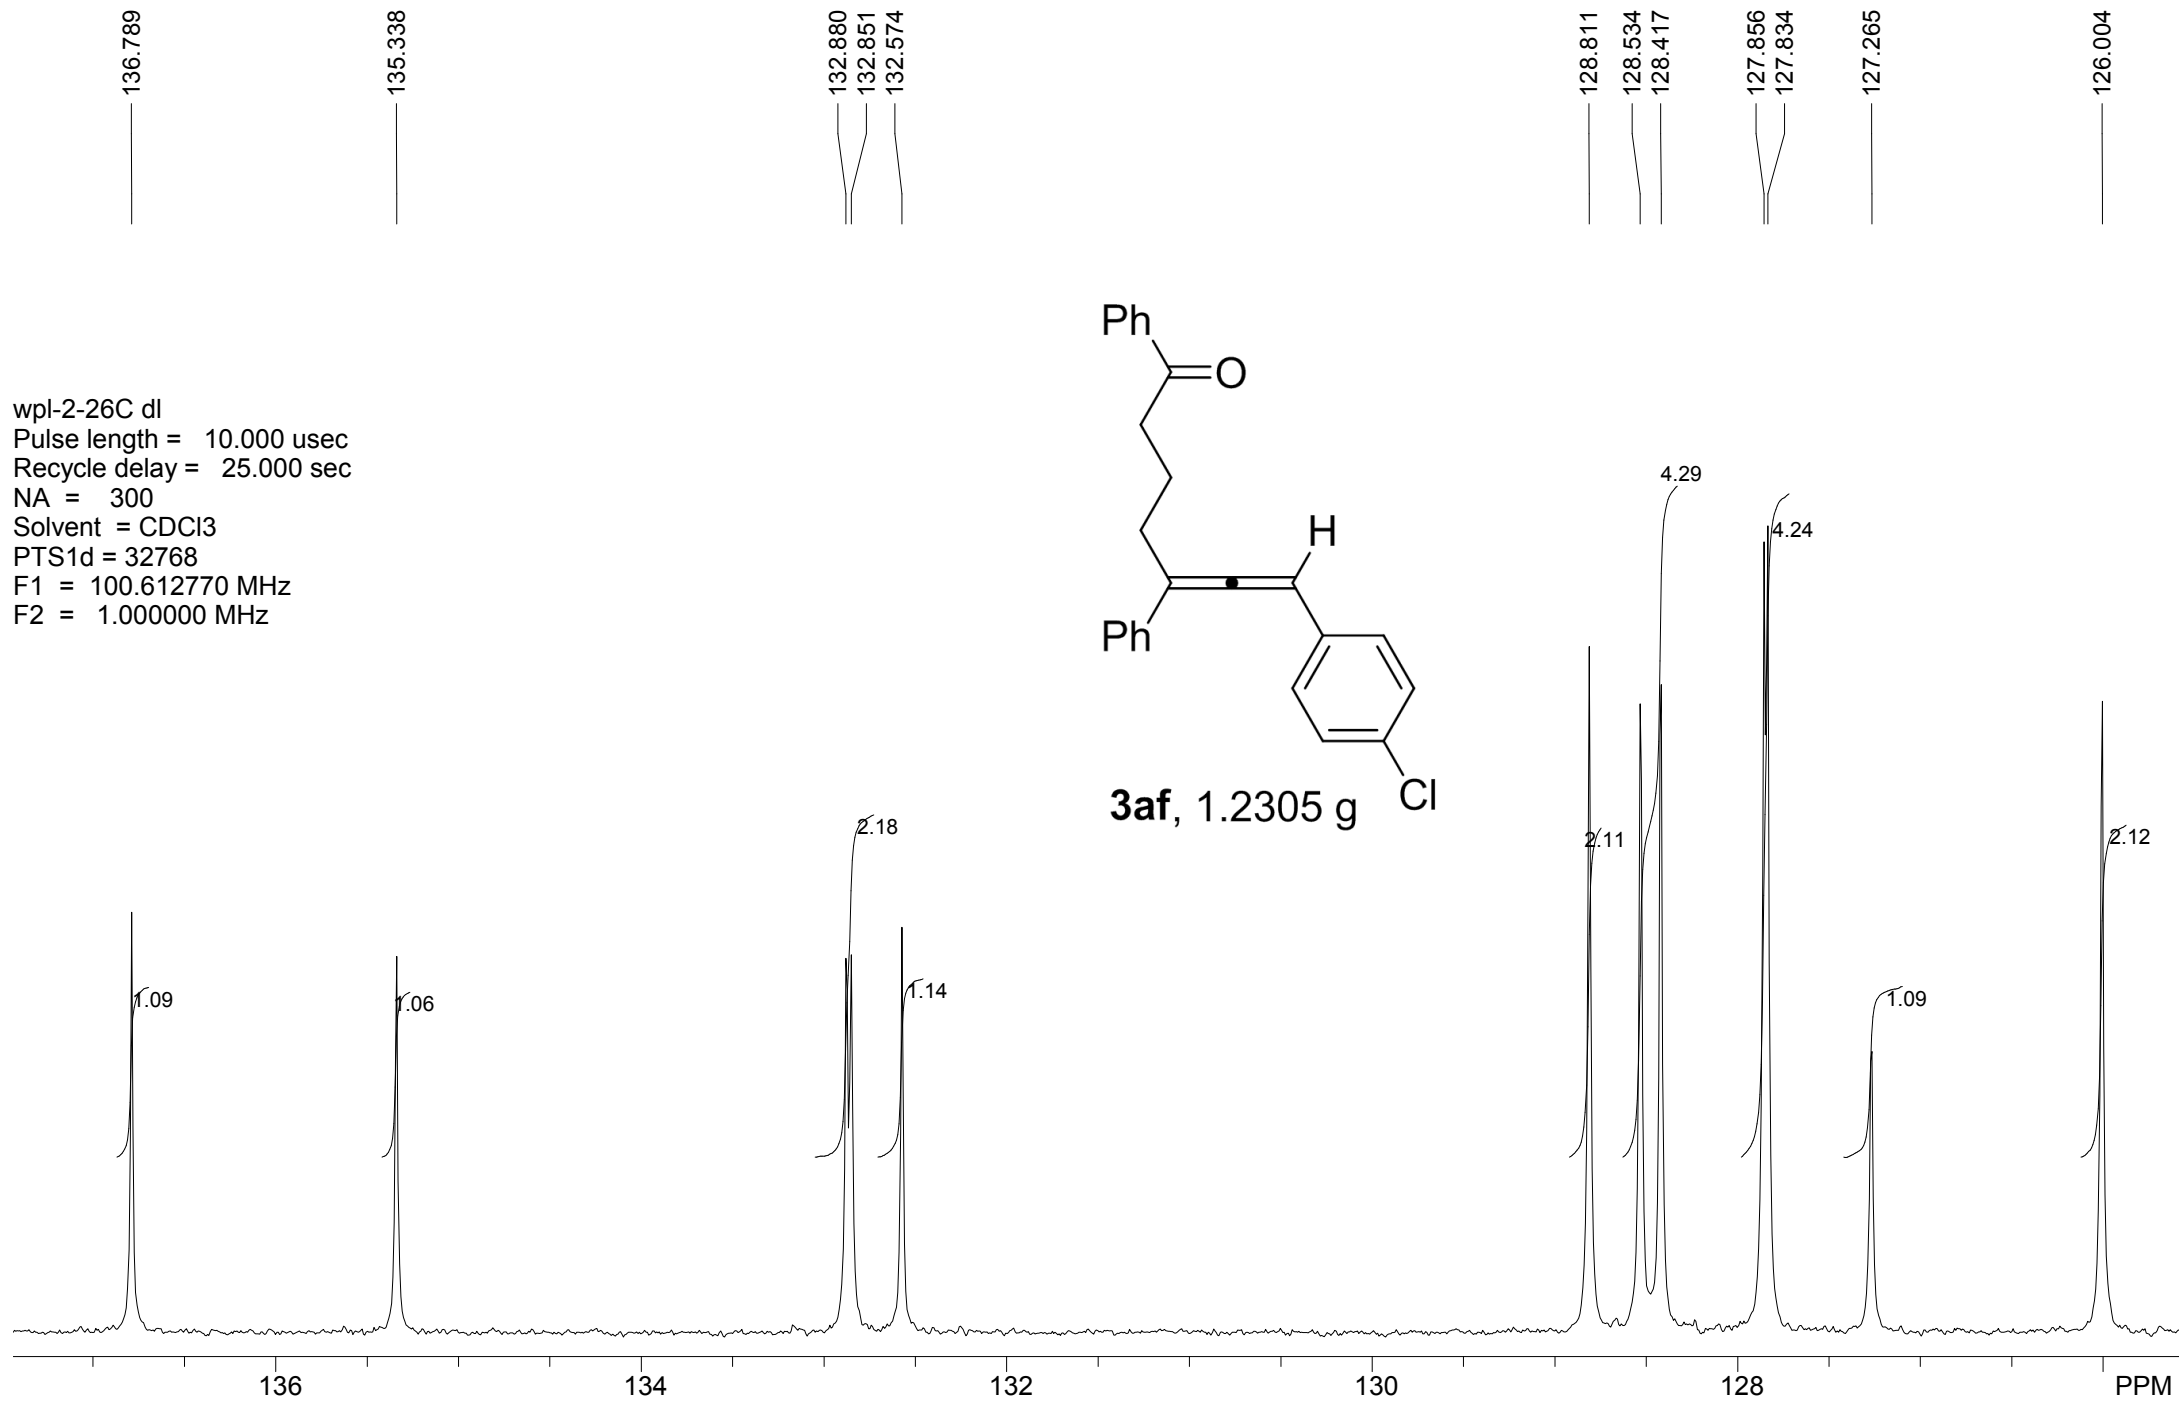

wpl-3-157H  
Pulse length = 10.000 usec  
Recycle delay = 1.000 sec  
NA = 4  
Solvent = CDCl3  
PTS1d = 65536  
F1 = 400.130035 MHz  
F2 = 1.000000 MHz

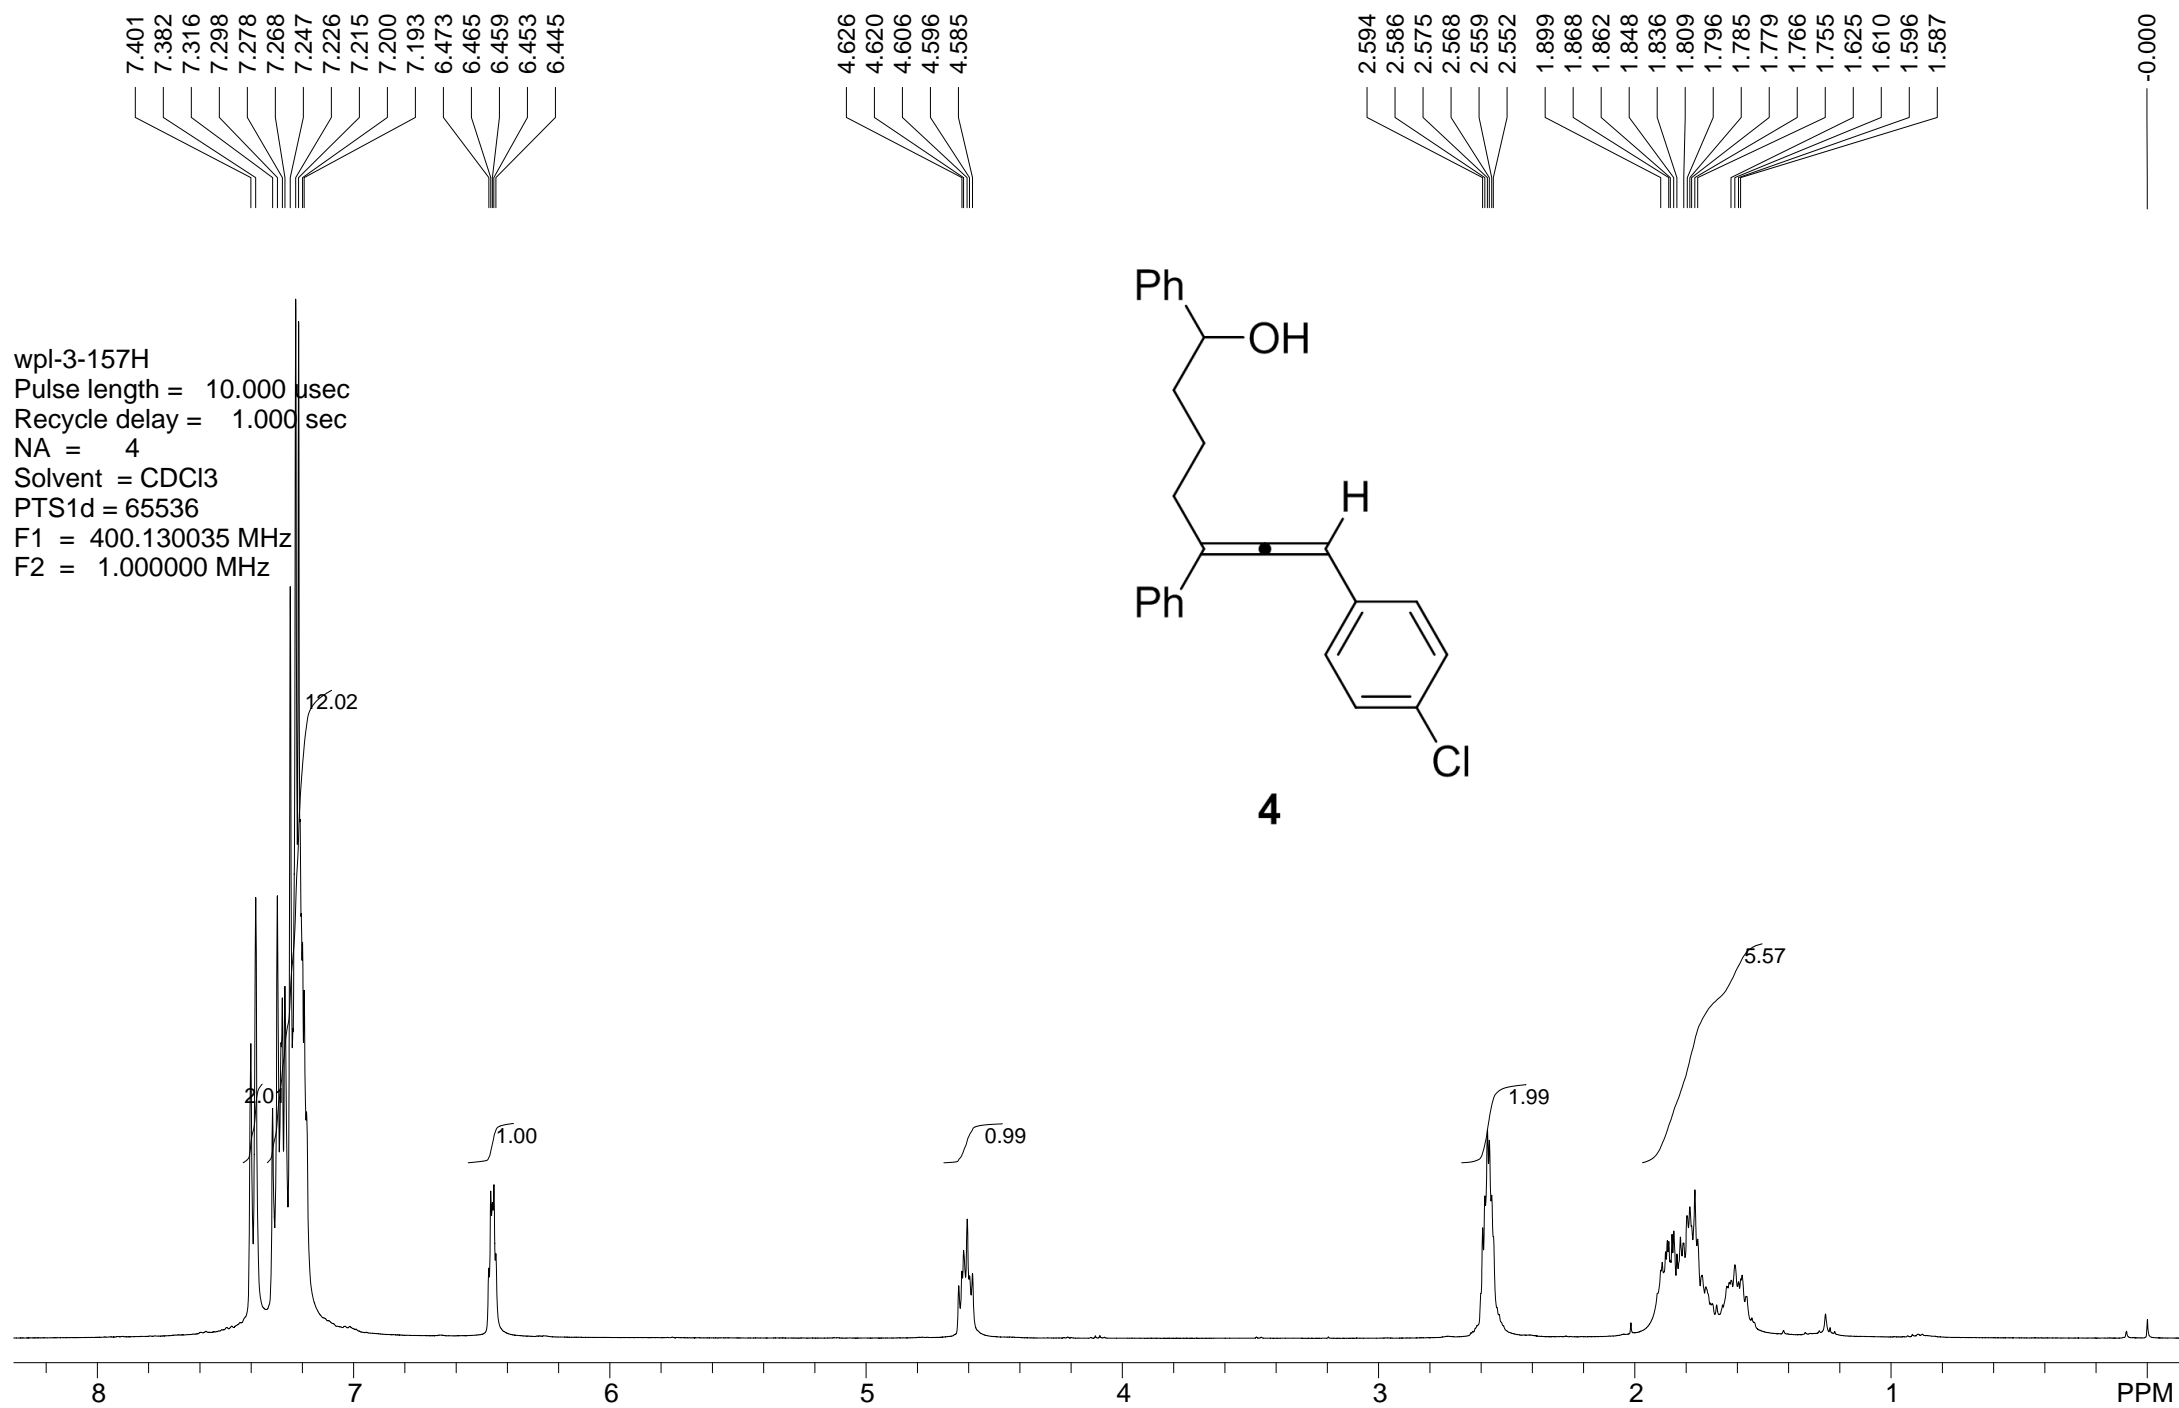



wpl-3-157C  
Pulse length = 10.000 usec  
Recycle delay = 2.000 sec  
NA = 1024  
Solvent = CDCl3  
PTS1d = 32768  
F1 = 100.612770 MHz  
F2 = 1.000000 MHz

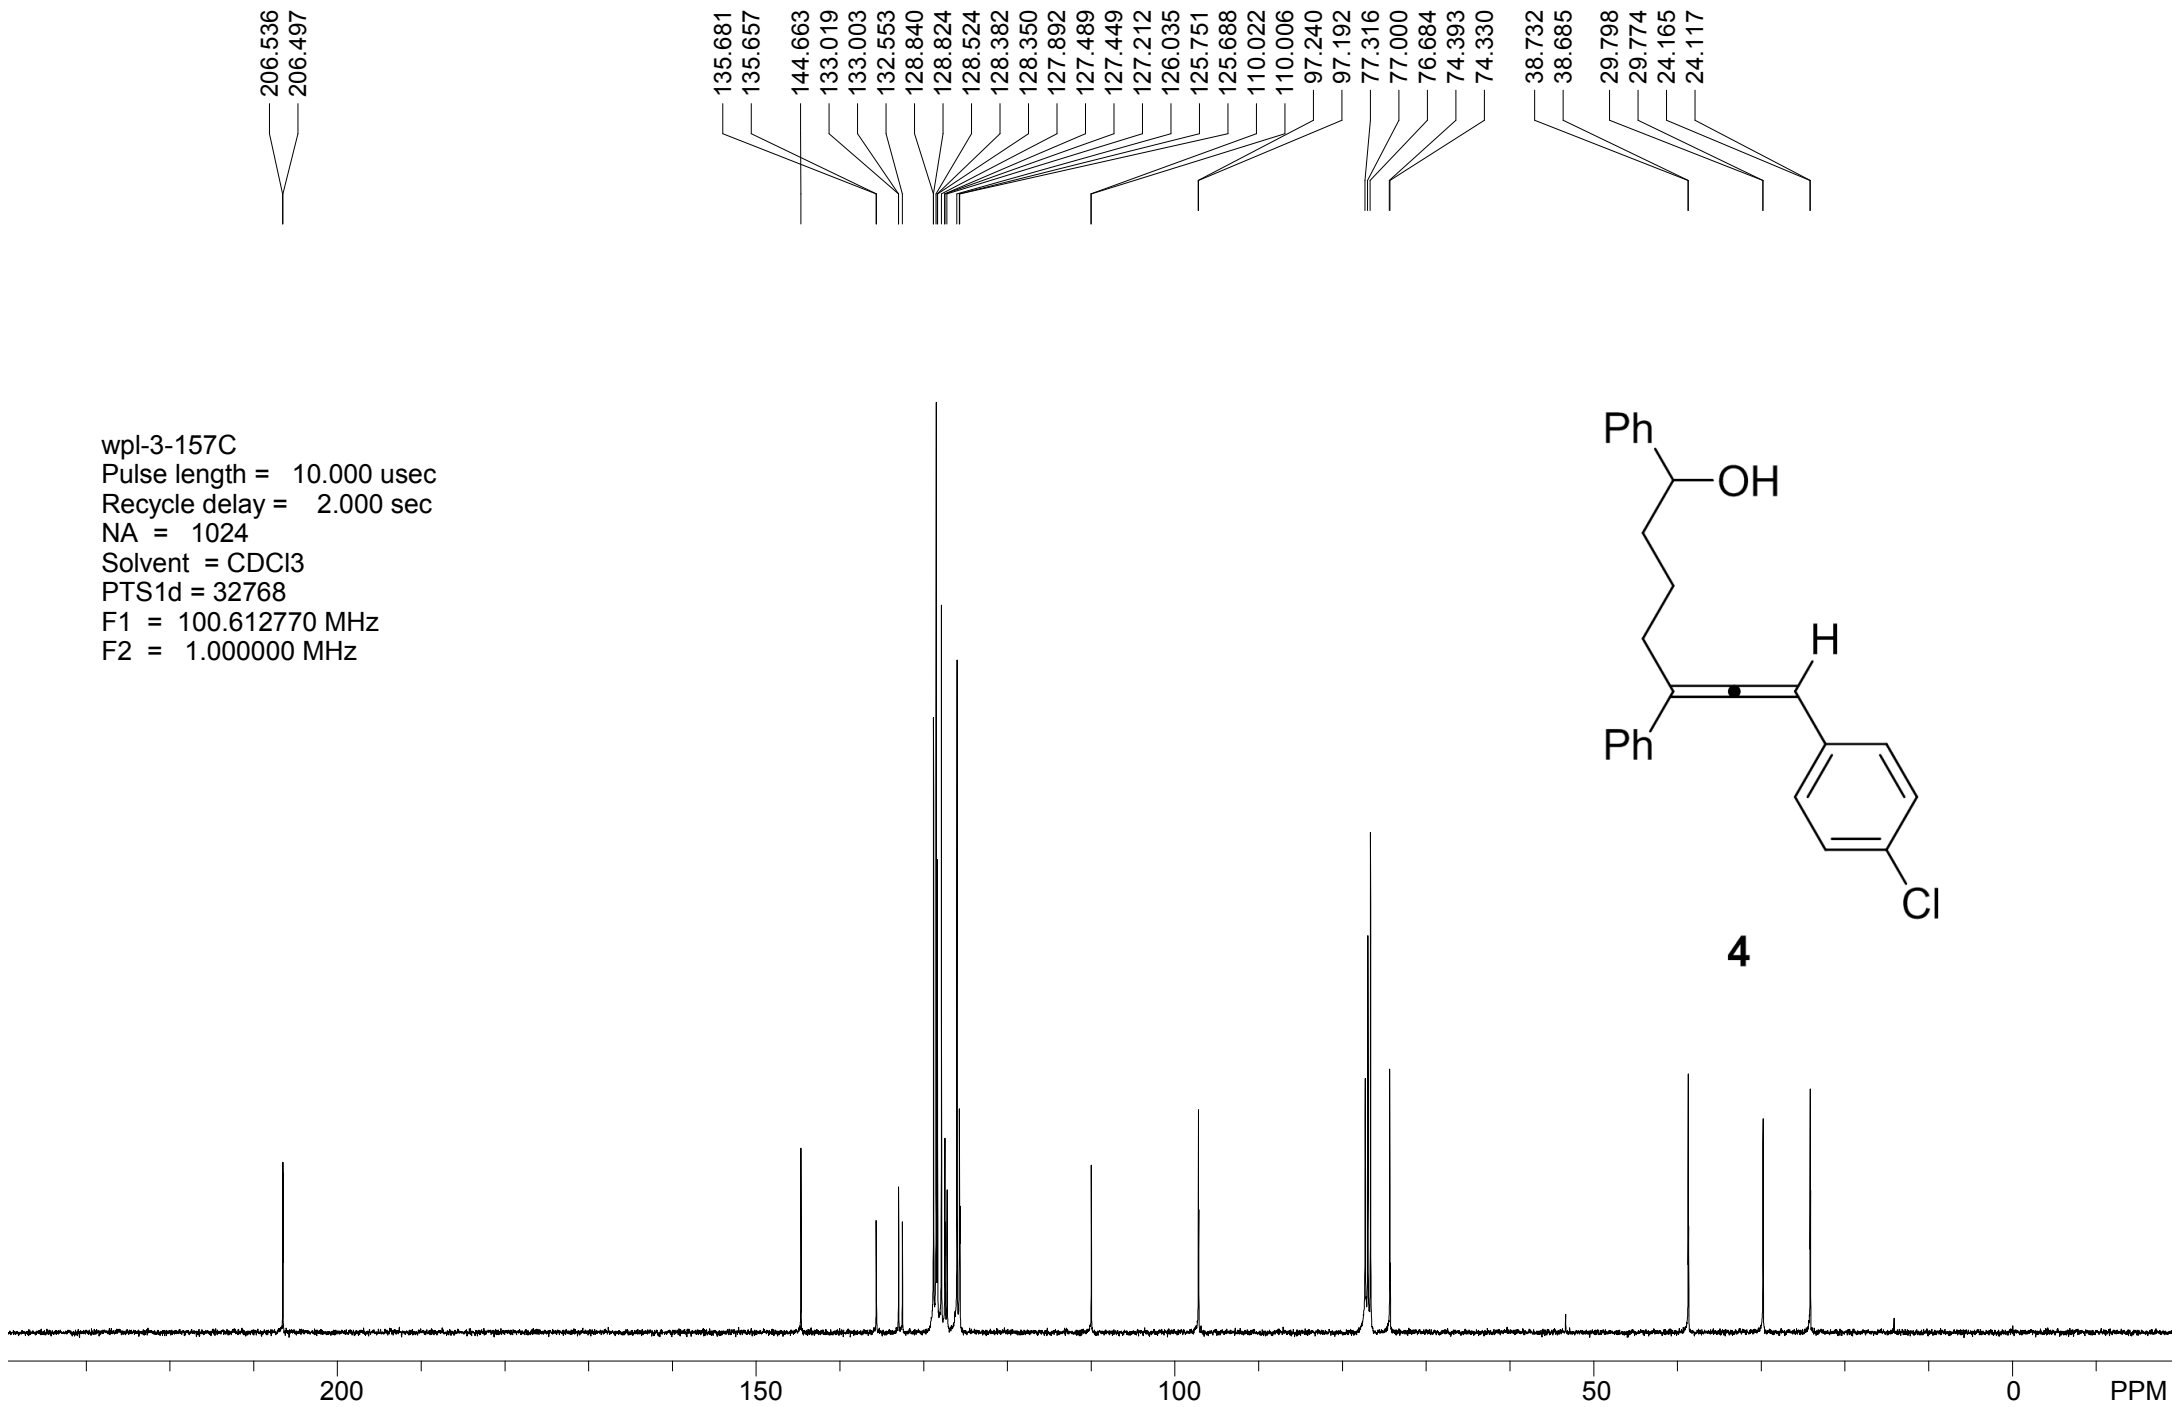

206.495  
206.459

135.637  
144.621  
135.608  
132.975  
132.961  
132.501  
128.804  
128.789  
128.490  
128.323  
128.286  
127.863  
127.418  
127.375  
127.178  
126.004  
125.727  
125.654  
109.990  
109.975  
97.207  
97.156  
77.314  
77.000  
76.679  
74.302  
74.236

38.679  
38.628  
29.746  
29.724  
24.117  
24.066

wpl-3-157C  
Pulse length = 10.000 usec  
Recycle delay = 25.000 sec  
NA = 512  
Solvent = CDCl3  
PTS1d = 32768  
F1 = 100.612770 MHz  
F2 = 1.000000 MHz

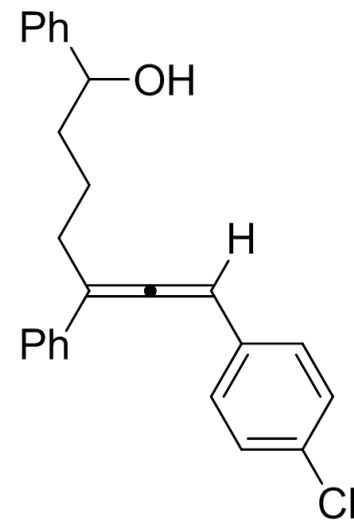

4

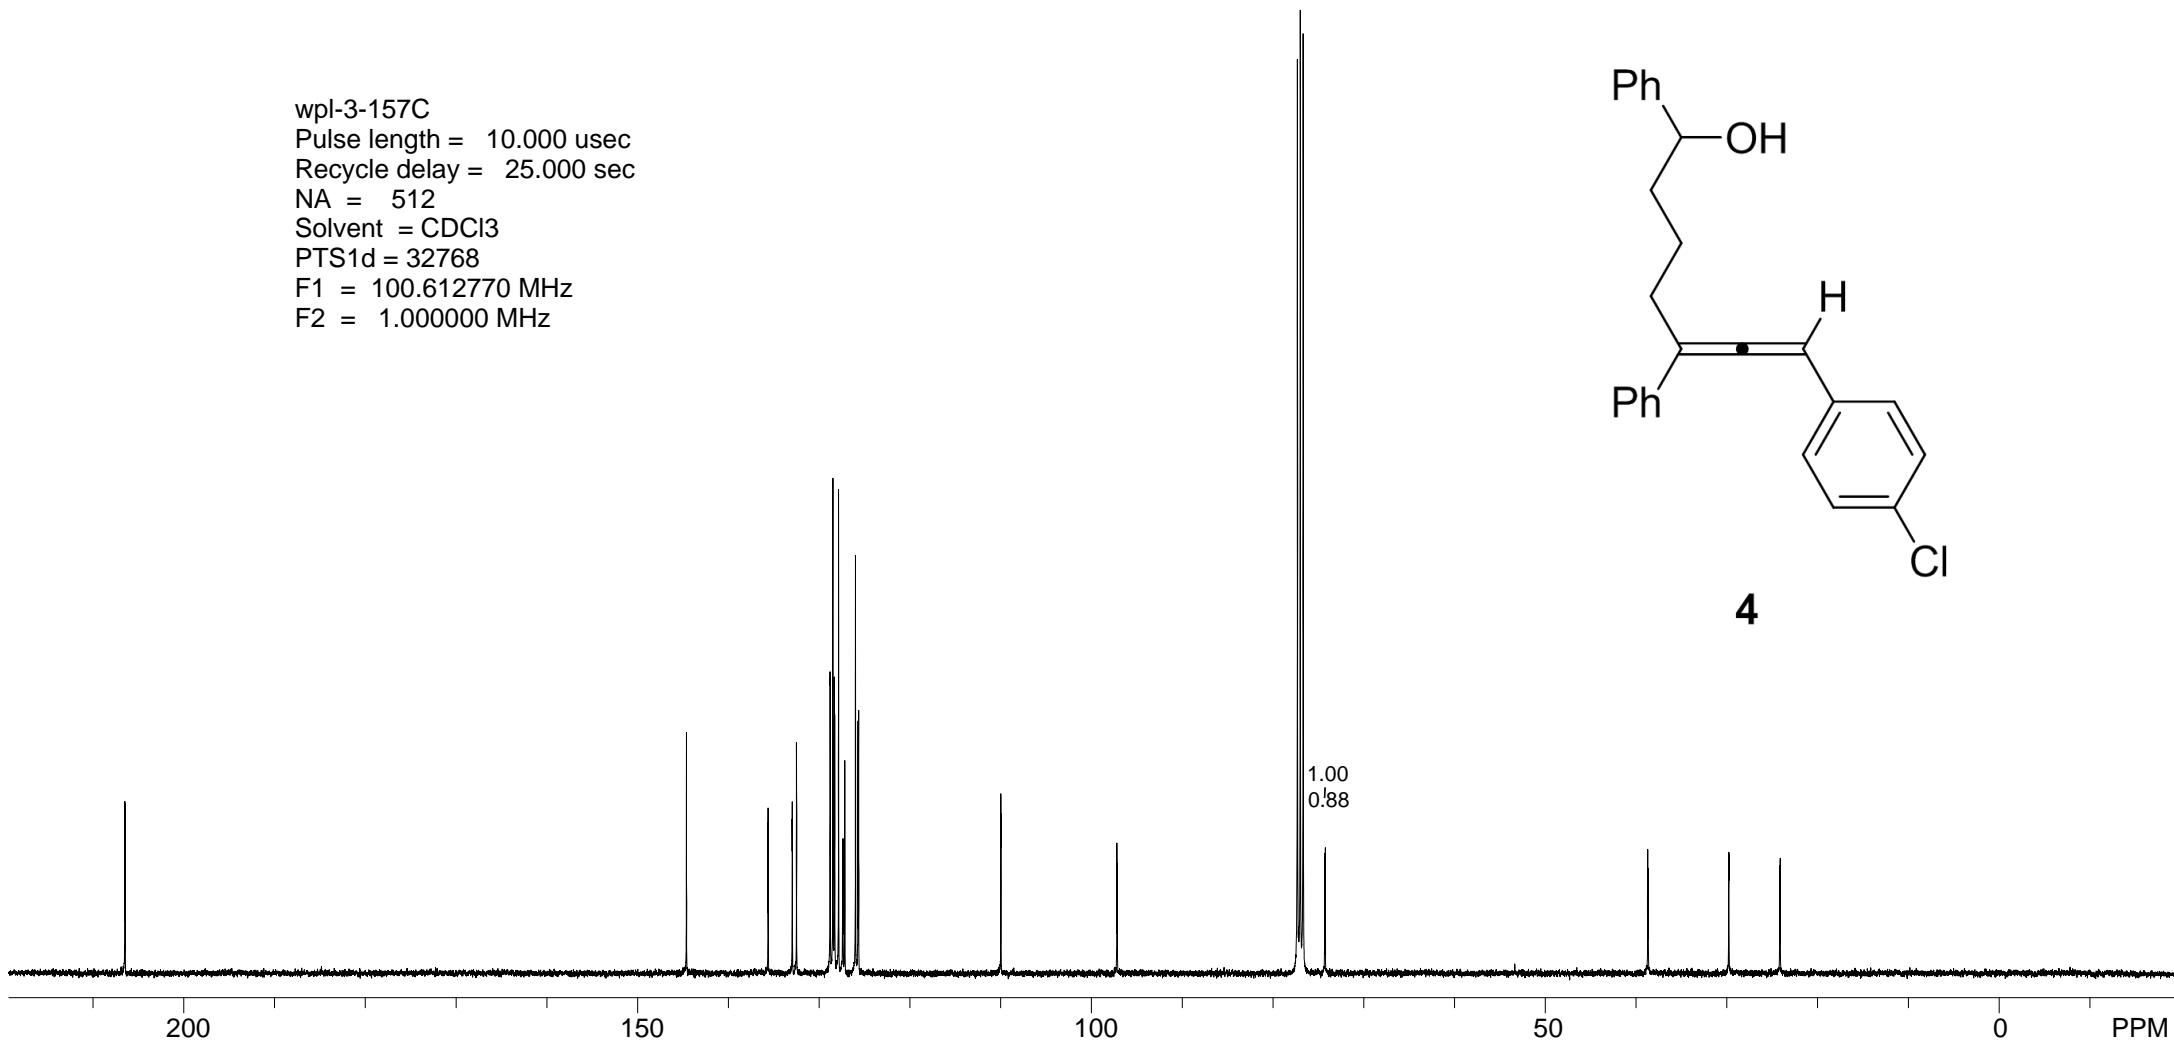

wpl-3-157C  
Pulse length = 10.000 usec  
Recycle delay = 25.000 sec  
NA = 512  
Solvent = CDCl3  
PTS1d = 32768  
F1 = 100.612770 MHz  
F2 = 1.000000 MHz

74.302

74.236

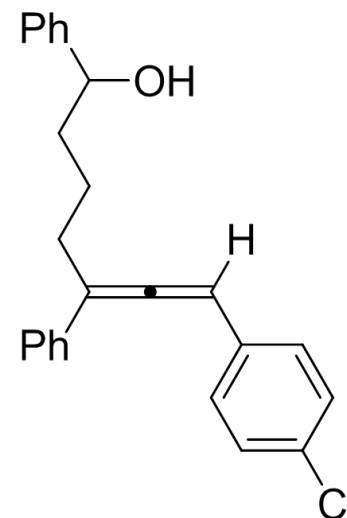

4

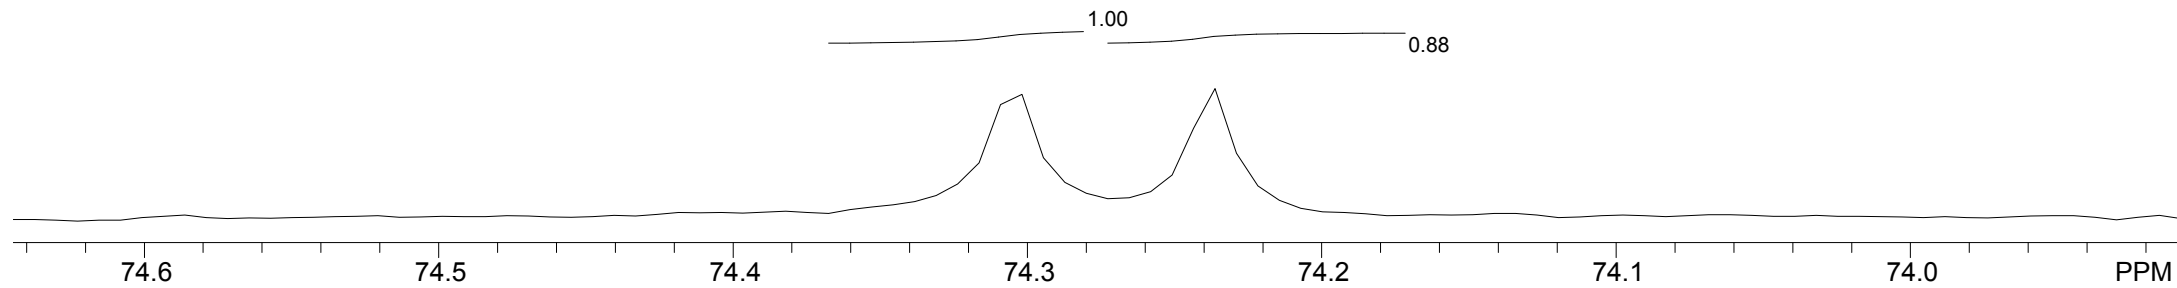

S54

wpl-2-174  
Jan 20 2018  
Pulse length = 3.400 usec  
Recycle delay = 20.000 sec  
NA = 4  
Solvent = cdcl3  
FID PTS1d = 16384  
PTS1d = 16384  
F1 = 399.749542 MHz  
F2 = 100.526031 MHz

7.374  
7.355  
7.348  
7.331  
7.328  
7.291  
7.284  
7.274  
7.263  
7.258  
7.254  
7.244  
7.238  
7.215  
7.204  
7.189  
7.182  
7.172  
7.156  
6.452  
6.445  
6.439  
5.265  
5.028  
2.617  
2.600  
2.579  
2.558  
2.551  
1.782  
1.774  
1.765  
1.755  
1.746  
1.736

-0.000

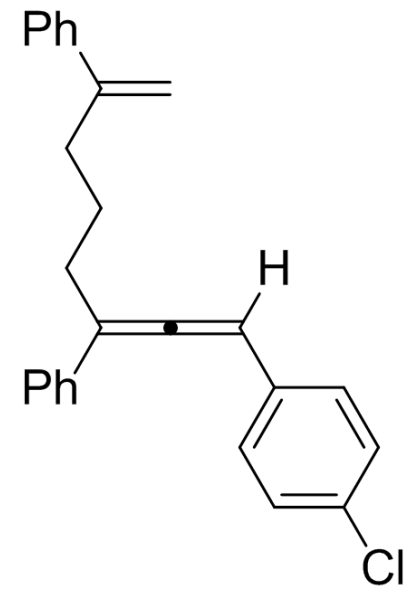

5

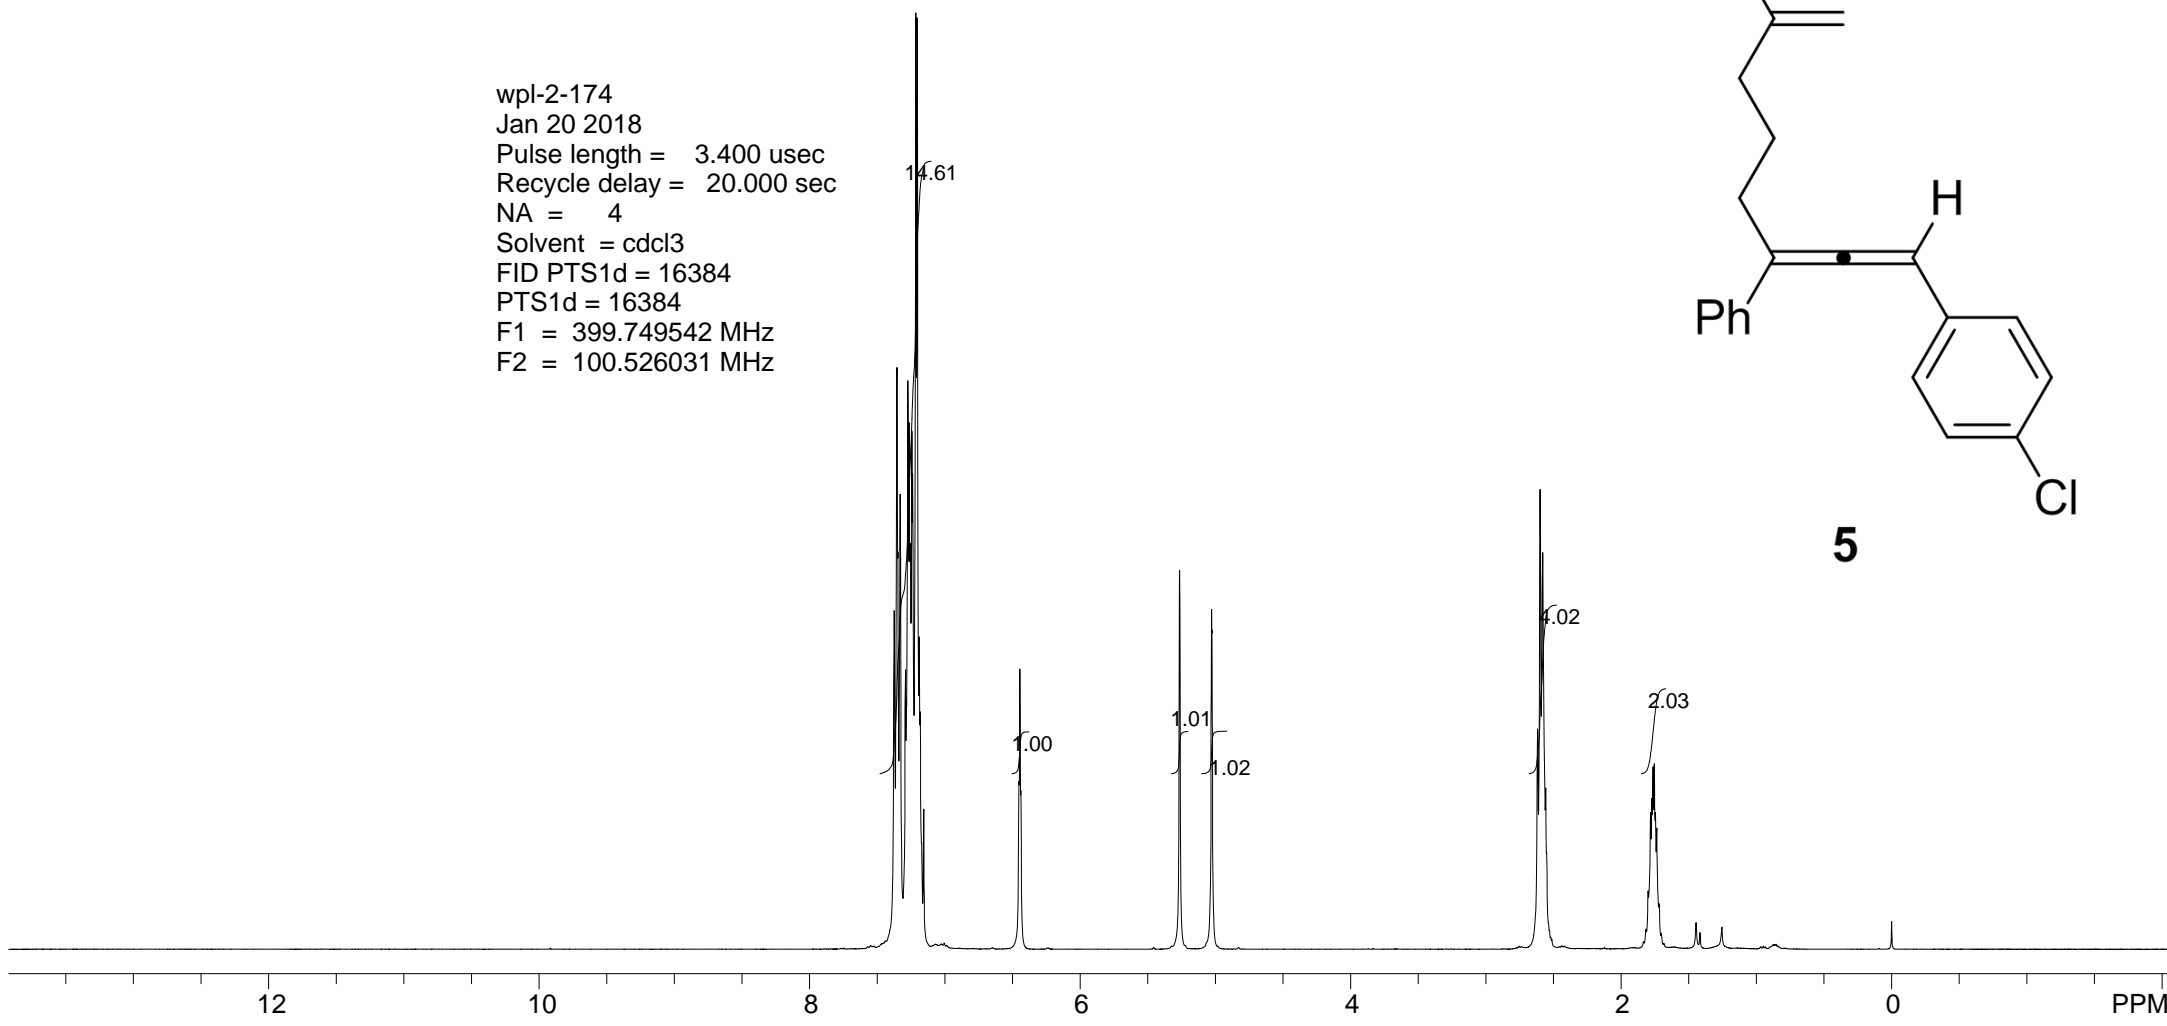

wpl-2-174  
Jan 20 2018  
Pulse length = 4.000 usec  
Recycle delay = 1.000 sec  
NA = 512  
Solvent = cdcl3  
FID PTS1d = 32768  
PTS1d = 32768  
F1 = 100.527557 MHz  
F2 = 399.749146 MHz

206.500

147.910

140.972

135.613

133.017

132.524

128.827

128.509

128.228

127.863

127.309

127.180

126.072

126.034

112.607

109.965

97.099

77.319

77.000

76.681

34.866

29.461

26.197

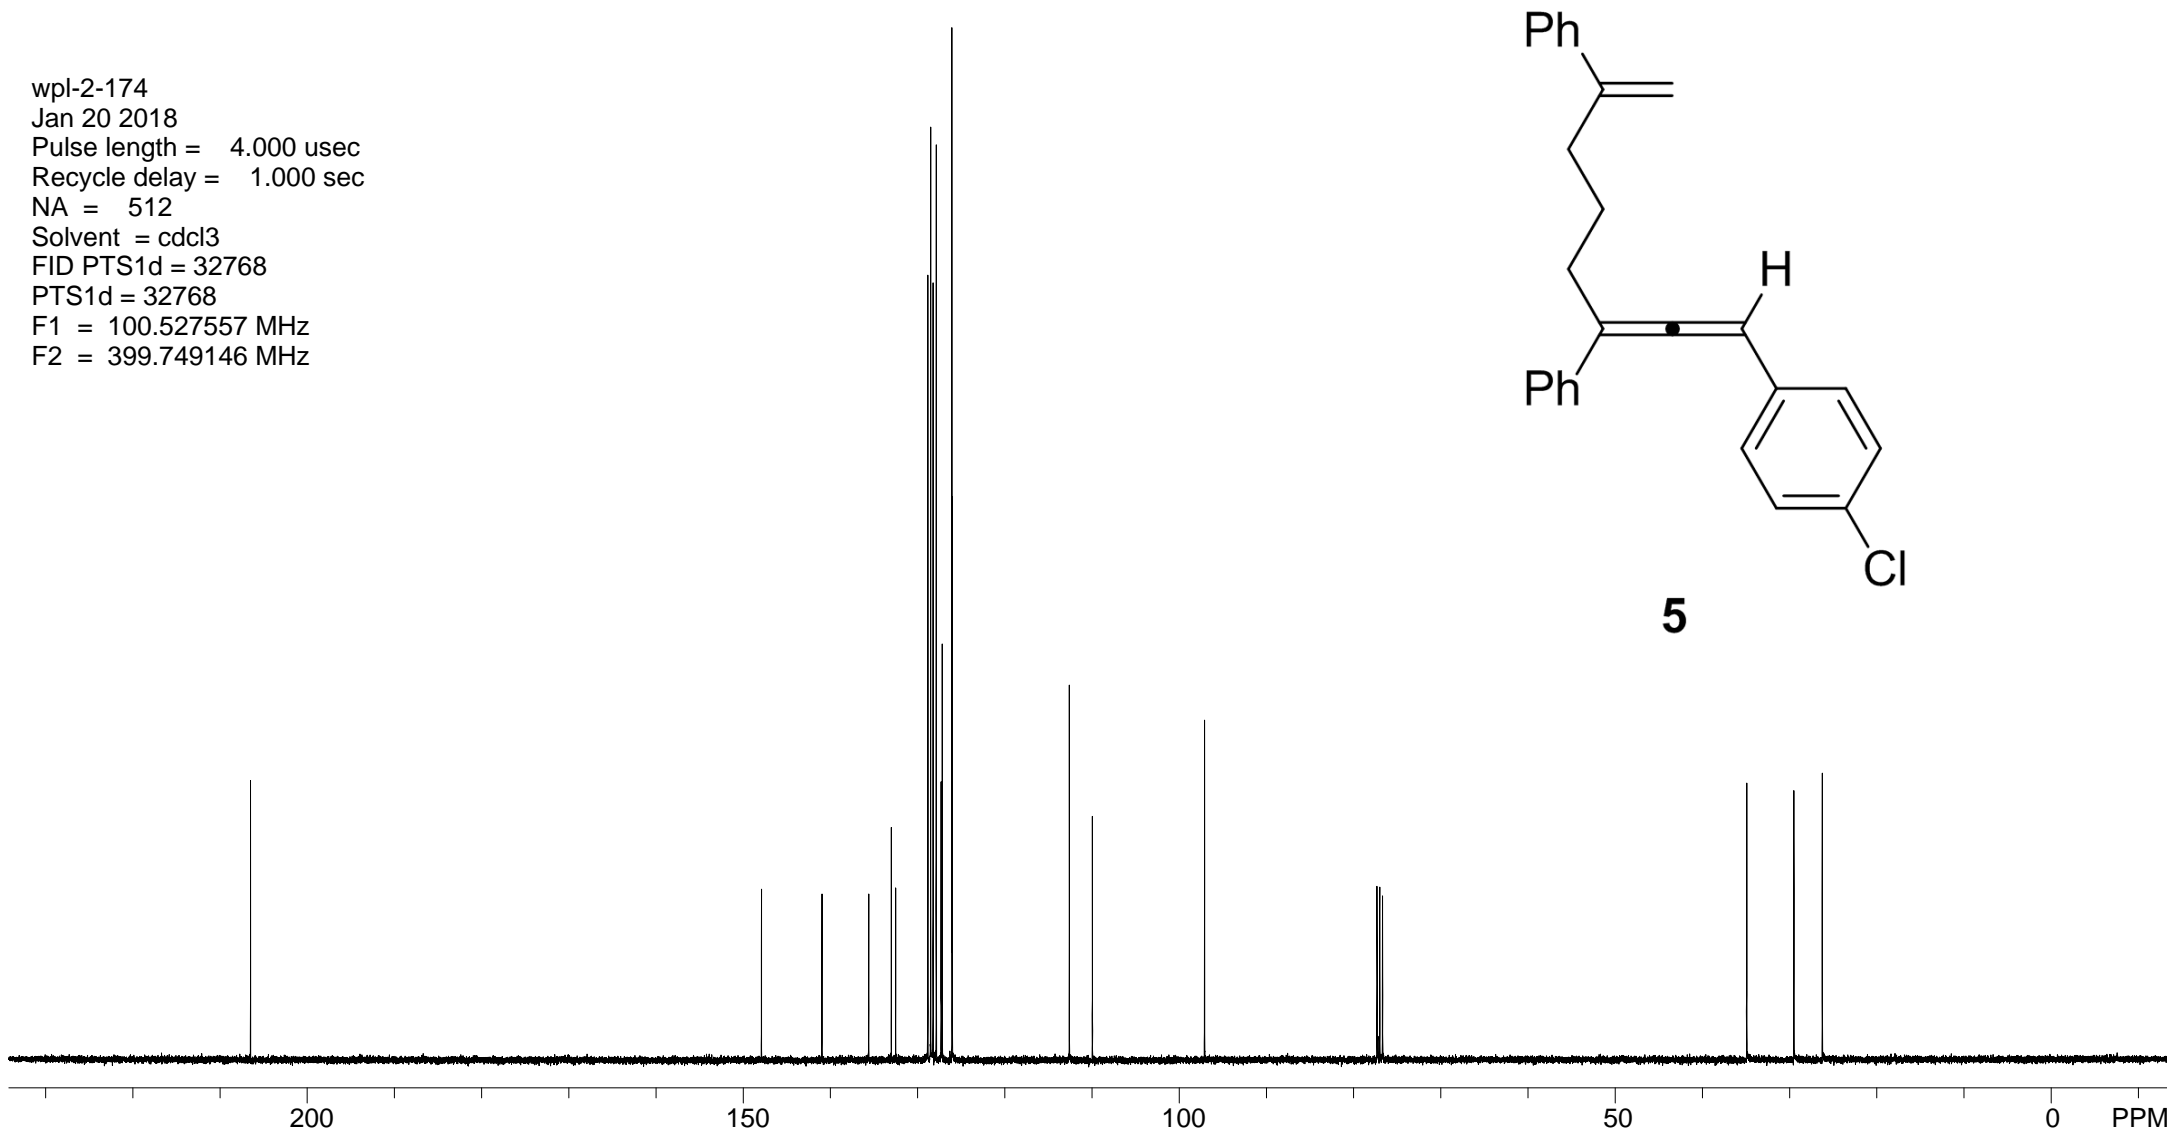

S56

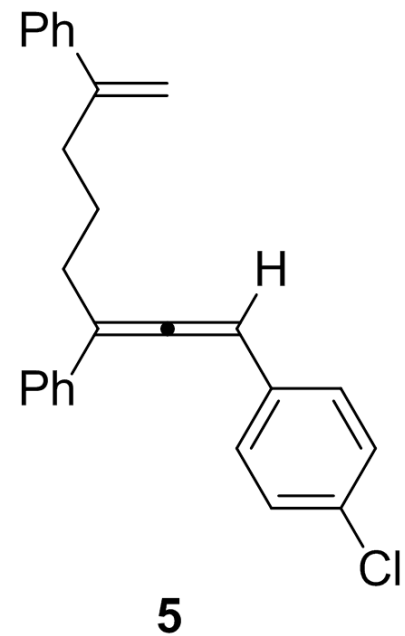

Supplement: c9qo00192a1.pdf [file c9qo00192a1.pdf]
